# Supplementary material
Source: publisher figshare collection journal article supplement (https://gsajournals.figshare.com/ndownloader/files/16251959)
Supplement: Supplementary file 1 [file 16251959]

## Sheet: filtered_data
VarID	2% xylose	2% starch	C. source absent	BPS 300 uM	BPS 500 uM	Congo Red 250 ug/ml	Congo Red 350 ug/ml	Caffeine 30 mM	CFW 15 uM	CFW 20 uM	Caspofungin 0.3 ug/ml	SDS 0.04 %	SDS 0.08 %	CdCl2 0.1 mM	CdCl2 0.3 mM	CoCl2 4 mM	Fluconazole 8 ug/ml	Fluconazole 10 ug/ml	Ketoconazole 0.1 ug/ml	Ketoconazole 0.2 ug/ml	Ketoconazole 0.5 ug/ml	Nystatin 14 ug/ml	Sample:GT	chr	start	end	width	ref	alt	impact	consequence	gene	cpar	calb	scer	scername	hgvsc	hgvsp	cdspos	aapos	LOF	GeneInfo	phenotype	domains	GO
1_57028_T_TAGTCAATGGAATCAAAAATACGAAGTTGATACCCAAGGCAAAGAAGATACCCCAGACAGGAGTTTGTGCTGGATACACCTTGACACACAAGATGGCCAAAACAAGCGAAATG	0	0	0	0	0	0.447214	0.288675	0	1	0.267261	0	0	0	0.301511	0.208514	0	0	0	0	0	0	0	Sample_435:0/1	1	57028	57028	1	T	TAGTCAATGGAATCAAAAATACGAAGTTGATACCCAAGGCAAAGAAGATACCCCAGACAGGAGTTTGTGCTGGATACACCTTGACACACAAGATGGCCAAAACAAGCGAAATG	frameshift_variant	HIGH	CORT_0A00350	CPAR2_800240	orf19.3746	---		c.1275_1276insCATTTCGCTTGTTTTGGCCATCTTGTGTGTCAAGGTGTATCCAGCACAAACTCCTGTCTGGGGTATCTTCTTTGCCTTGGGTATCAACTTCGTATTTTTGATTCCATTGACT	p.Thr426fs	1275/2109	425/702	(CORT_0A00350|CORT_0A00350|1|1.00)	putative oligopeptide transporter	NA	NULL|Oligopeptide transporter OPT superfamily	|Biological Process: transmembrane transport (GO:0055085)
1_492619_A_T	0	0.2	0.632456	0	0	0.4	0.258199	0	0	0.239046	0.258199	0	0	0	0.373002	0	0.894427	0.894427	0.447214	0.676123	0.456435	0	Sample_425:0/1;Sample_426:0/1;Sample_436:0/1;Sample_504:0/1;Sample_831:0/1	1	492619	492619	1	A	T	stop_gained	HIGH	CORT_0A02170	CPAR2_802120	orf19.4395	YMR092C	AIP1,	c.10A>T	p.Lys4*	10/1845	4/614	character(0)	putative actin cytoskeleton component	;viable;	WD40-repeat-containing domain|WD40/YVTN repeat-like-containing domain|NULL|WD40 repeat	Molecular Function: protein binding (GO:0005515)|
1_1461470_C_CA	0	0	0.353553	0	0	0.447214	0.288675	0	0	0.267261	0	0	0	0	0.208514	0	0.5	0.5	1	0.377964	0.204124	0	Sample_425:1/1	1	1461470	1461470	1	C	CA	frameshift_variant	HIGH	CORT_0A06610	CPAR2_207270	---	---		c.1447dupA	p.Ile483fs	1448/1578	483/525	(CORT_0A06610|CORT_0A06610|1|1.00)	hypothetical protein	NA	NULL|Major facilitator superfamily|Major facilitator superfamily domain, general substrate transporter	|Cellular Component: integral to membrane (GO:0016021), Biological Process: transmembrane transport (GO:0055085)
1_1576437_CA_C	0	0	0.353553	0	0	0.447214	0.288675	0	0	0.267261	0	0	0	0	0.208514	0	0.5	0.5	1	0.377964	0.204124	0	Sample_425:0/1	1	1576437	1576438	2	CA	C	frameshift_variant	HIGH	CORT_0A07120	---	---	---		c.1149delT	p.Ala384fs	1149/1242	383/413	(CORT_0A07120|CORT_0A07120|1|1.00)	hypothetical protein	NA	LicD
1_2068231_T_TATCAA	0	0	0	0	0	0.447214	0.288675	0	1	0.267261	0	0	0	0.301511	0.208514	0	0	0	0	0	0	0	Sample_435:0/1	1	2068231	2068231	1	T	TATCAA	frameshift_variant	HIGH	CORT_0A09370	CPAR2_210110	---	---		c.605_606insATCAA	p.Leu204fs	606/2241	202/746	(CORT_0A09370|CORT_0A09370|1|1.00)	hypothetical protein	NA	Riboflavin synthase-like beta-barrel|Ferredoxin reductase-type FAD-binding domain|Ferric reductase, NAD binding|NULL|Ferric reductase transmembrane component-like domain|FAD-binding 8	Molecular Function: oxidoreductase activity (GO:0016491), Biological Process: oxidation-reduction process (GO:0055114)|
1_2133377_CTTTT_CTT	0.57735	0.894427	0.53033	0.5	0.5	0	0	0	0	0	0	0.707107	0.866025	0.603023	0.417029	0	0	0	0	0.188982	0.306186	0	Sample_1799:0/1;Sample_423:0/1;Sample_428:1/1;Sample_434:0/1	1	2133377	2133381	5	CTTTT	CTT	frameshift_variant	HIGH	CORT_0A09660	CPAR2_210345	orf19.1482	---		c.48_49delAA	p.Lys17fs	49/435	16/144	(CORT_0A09660|CORT_0A09660|1|1.00)	putative subunit of the Dam1 (DASH) complex, which acts in chromosome segregation by coupling kinetochores to spindle microtubules	NA	Protein of unknown function DUF1721, fungi
1_2212025_C_CTT	0.57735	0.447214	0	1	1	0	0	0	0	0	0	0	0.57735	0.301511	0.208514	0	0	0	0	0	0.204124	0	Sample_423:0/1	1	2212025	2212025	1	C	CTT	frameshift_variant	HIGH	CORT_0A10050	CPAR2_210750	orf19.1584	---		c.1275_1276insTT	p.Thr426fs	1276/1626	426/541	(CORT_0A10050|CORT_0A10050|1|1.00)	predicted membrane transporter, member of the monocarboxylate porter (MCP) family, major facilitator superfamily (MFS)	;viable;|;invasive growth: decreased;	Major facilitator superfamily|NULL|Major facilitator superfamily domain|Major facilitator superfamily domain, general substrate transporter	Cellular Component: integral to membrane (GO:0016021), Biological Process: transmembrane transport (GO:0055085)|
1_2377614_GT_G	0	0	0	0	0	0.447214	0.288675	0	1	0.267261	0	0	0	0.301511	0.208514	0	0	0	0	0	0	0	Sample_435:0/1	1	2377614	2377615	2	GT	G	frameshift_variant	HIGH	CORT_0A10840	CPAR2_211500	orf19.875	---		c.444delA	p.Lys148fs	444/1200	148/399	(CORT_0A10840|CORT_0A10840|1|1.00)	protein required for respiratory growth in C. albicans	glycerol;respiratory growth: absent;|;viable;	NA	NA
1_2467666_A_AGG	0	0	0.353553	0	0	0.447214	0.288675	0	0	0.267261	0	0	0	0	0.208514	0	0.5	0.5	1	0.377964	0.204124	0	Sample_425:0/1	1	2467666	2467666	1	A	AGG	frameshift_variant	HIGH	CORT_0A11230	CPAR2_211890	orf19.886	YIR006C	PAN1,PAN1	c.4081_4082dupCC	p.Pro1362fs	4082/4233	1361/1410	character(0)	essential protein involved in endocytosis and polarized growth	;cell shape: abnormal;round and swollen cells upon depletion|;inviable;homozygous null mutant strain could not be recovered, suggesting that the gene is essential under the selection conditions|;endocytosis: decreased;strong defect in uptake of FM4-64|;viable;	Calcium-binding EF-hand|Actin cytoskeleton-regulatory complex protein PAN1|EPS15 homology (EH)|WH2 domain|NULL|EF-hand-like domain|Domain of unknown function DUF1720|EF-HAND 2	Molecular Function: calcium ion binding (GO:0005509)|Biological Process: endocytosis (GO:0006897)|Molecular Function: protein binding (GO:0005515)|Molecular Function: actin binding (GO:0003779)|
1_2844173_A_AACCCCCCCCC	0	0	0	0	0	0.447214	0.288675	0	1	0.267261	0	0	0	0.301511	0.208514	0	0	0	0	0	0	0	Sample_435:0/1	1	2844173	2844173	1	A	AACCCCCCCCC	frameshift_variant	HIGH	CORT_0A13080	---	---	---		c.157_158insGGGGGGGGGT	p.Val53fs	157/162	53/53	character(0)	hypothetical protein	NA	NA	NA
2_679657_C_CCAATGGTGAATCGATACAAGAG	0	0	0.353553	0	0	0.447214	0.288675	0	0	0.267261	0	0	0	0	0.208514	0	0.5	0.5	1	0.377964	0.204124	0	Sample_425:1/1	2	679657	679657	1	C	CCAATGGTGAATCGATACAAGAG	frameshift_variant	HIGH	CORT_0B03170	CPAR2_101870	---	---		c.945_946insAATGGTGAATCGATACAAGAGC	p.???316fs	946/2004	316/667	(CORT_0B03170|CORT_0B03170|1|1.00)	gene extends across a gap in the genome sequence; similar to C. parapsilosis CPAR2_101870; hypothetical protein	NA	NULL|Mg2+ transporter protein, CorA-like/Zinc transport protein ZntB	|Cellular Component: membrane (GO:0016020), Biological Process: metal ion transport (GO:0030001), Molecular Function: metal ion transmembrane transporter activity (GO:0046873), Biological Process: transmembrane transport (GO:0055085)
2_733600_T_C	0	0	0	0	0	0	0	1	0	0	0.57735	0	0	0	0.208514	0.707107	0	0	0	0.377964	0.204124	1	Sample_185:0/1	2	733600	733600	1	T	C	start_lost	HIGH	CORT_0B03390	CPAR2_102080	orf19.260	---	SLD1	c.1A>G	p.Met1?	1/1725	1/574	(CORT_0B03390|CORT_0B03390|1|1.00)	sphingolipid delta-8 desaturase, catalyzes desaturation at carbon-8 in the long-chain base moiety of ceramides during glucosylceramide synthesis, which is important for virulence	;hyphal growth: decreased;|;viable;|;viable;|sodium dodecyl sulfate;resistance to chemicals: decreased;|fluconazole;resistance to chemicals: decreased;|;colony appearance: normal;Morphology (M) score represents relative sizes of central and peripheral regions of colony|;vegetative growth: normal rate;|;virulence: decreased;|glucosylceramide;chemical compound accumulation: absent;mature glucosylce…	NULL|Cytochrome b5|Fatty acid desaturase, type 1|Fatty acid/sphingolipid desaturase	|Molecular Function: heme binding (GO:0020037)|Biological Process: lipid metabolic process (GO:0006629)|Molecular Function: iron ion binding (GO:0005506), Biological Process: fatty acid biosynthetic process (GO:0006633), Molecular Function: oxidoreductase activity, acting on paired donors, with oxidation of a pair of donors resulting in the reduction of molecular oxygen to two molecules of water …
2_862565_G_A	0	0	0	0	0	0	0	1	0	0	0.57735	0	0	0	0.208514	0.707107	0	0	0	0.377964	0.204124	1	Sample_185:0/1	2	862565	862565	1	G	A	stop_gained	HIGH	CORT_0B03950	CPAR2_102700	orf19.323	---		c.544C>T	p.Arg182*	544/4560	182/1519	character(0)	putative haloacid dehalogenase	NA	ATPase, P-type, phospholipid-translocating, flippase|ATPase, P-type, cytoplasmic transduction domain A|NULL|Phospholipid-transporting ATPase DNF-type|ATPase, cation-transporting, domain N|HAD-like domain|ATPase, P-type, K/Mg/Cd/Cu/Zn/Na/Ca/Na/H-transporter|ATPase, P-type, cytoplasmic domain N|ATPase, P-type, ATPase-associated domain|ATPase, P-type phosphorylation site	Molecular Function: magnesium ion binding (GO:0000287), Molecular Function: phospholipid-translocating ATPase activity (GO:0004012), Molecular Function: ATP binding (GO:0005524), Biological Process: phospholipid transport (GO:0015914), Cellular Component: integral to membrane (GO:0016021)||Molecular Function: phospholipid-translocating ATPase activity (GO:0004012)|Molecular Function: hydrolase ac…
2_913085_CT_C	0	0	0	0	0	0.447214	0.288675	0	1	0.267261	0	0	0	0.301511	0.208514	0	0	0	0	0	0	0	Sample_435:0/1	2	913085	913086	2	CT	C	frameshift_variant	HIGH	CORT_0B04230	CPAR2_102960	---	YBR223C	,TDP1	c.198delA	p.Glu67fs	198/1602	66/533	(CORT_0B04230|CORT_0B04230|1|1.00)	hypothetical protein	NA	Tyrosyl-DNA phosphodiesterase|NULL	Cellular Component: nucleus (GO:0005634), Biological Process: DNA repair (GO:0006281), Molecular Function: phosphoric diester hydrolase activity (GO:0008081)|
2_1302958_G_T	0	0	0	0	0	0.447214	0.288675	0	1	0.267261	0	0	0	0.301511	0.208514	0	0	0	0	0	0	0	Sample_435:0/1	2	1302958	1302958	1	G	T	stop_gained	HIGH	CORT_0B06120	CPAR2_104920	orf19.2194	YOL062C	APM4,APM4	c.60C>A	p.Tyr20*	60/1371	20/456	character(0)	phosphorylated protein of unknown function	;viable;|;viable;|;hyphal growth: decreased;|;invasive growth: decreased;	NULL|Longin-like domain|Clathrin adaptor, mu subunit|Clathrin adaptor, mu subunit, C-terminal|Clathrin coat associated protein AP-50|Clathrin adaptor, mu subunit, conserved site	|Biological Process: transport (GO:0006810)|Biological Process: intracellular protein transport (GO:0006886), Biological Process: vesicle-mediated transport (GO:0016192), Cellular Component: clathrin adaptor complex (GO:0030131)|Molecular Function: protein binding (GO:0005515), Biological Process: intracellular protein transport (GO:0006886), Biological Process: vesicle-mediated transport (GO:001…
2_1447211_A_AG	0	0	0.474342	0	0	0.4	0.387298	0	0	0.358569	0.258199	0	0	0	0.373002	0	0.894427	0.894427	0.447214	0.845154	0.456435	0	Sample_425:0/1;Sample_436:0/1;Sample_504:0/1;Sample_831:0/1;Sample_B-8323:0/1	2	1447211	1447211	1	A	AG	frameshift_variant	HIGH	CORT_0B06810	CPAR2_105590	orf19.761	YPL180W	TCO89,TCO89	c.488dupG	p.Gly164fs	489/2109	163/702	(CORT_0B06810|CORT_0B06810|1|1.00)	similar to C. parapsilosis CPAR2_105590 and C. albicans TCO89similar to S. cerevisiae Tco89p, which is a component of the TOR C1 complex that is involved in the regulation of growth and cell wall integrity	lithium(1+);resistance to chemicals: decreased;|;flocculation: increased;|rapamycin;resistance to chemicals: decreased;|rapamycin;resistance to chemicals: decreased;|;viable;	TORC1 complex, subunit TCO89
2_1470693_C_CTTCCAGGTAAGGACTACAACTTCACTCAATATTACAAGAACCTTGATCCATTTATCGACACATTTGACTTTTCTTTCTACCCAGATGCTCACTATGACGAAAACAATCAGTATGTGAAAGGTGA	0	0	0	0	0	0	0	1	0	0	0.57735	0	0	0	0.208514	0.707107	0	0	0	0.377964	0.204124	1	Sample_185:0/1	2	1470693	1470693	1	C	CTTCCAGGTAAGGACTACAACTTCACTCAATATTACAAGAACCTTGATCCATTTATCGACACATTTGACTTTTCTTTCTACCCAGATGCTCACTATGACGAAAACAATCAGTATGTGAAAGGTGA	frameshift_variant	HIGH	CORT_0B06930	CPAR2_105710	---	---		c.768_769insCCAGGTAAGGACTACAACTTCACTCAATATTACAAGAACCTTGATCCATTTATCGACACATTTGACTTTTCTTTCTACCCAGATGCTCACTATGACGAAAACAATCAGTATGTGAAAGGTGATT	p.???257fs	769/2133	257/710	(CORT_0B06930|CORT_0B06930|1|1.00)	gene extends across a gap in the genome sequence; similar to C. parapsilosis CPAR2_105710; hypothetical protein	NA	NULL|Metallophosphoesterase domain	|Molecular Function: hydrolase activity (GO:0016787)
2_1570472_A_AAATTAAAGATAATGCGGTTCAGG	0	0	0.353553	0	0	0.447214	0.288675	0	0	0.267261	0	0	0	0	0.208514	0	0.5	0.5	1	0.377964	0.204124	0	Sample_425:0/1	2	1570472	1570472	1	A	AAATTAAAGATAATGCGGTTCAGG	frameshift_variant	HIGH	CORT_0B07470	CPAR2_106230	orf19.3681	YLR347C	KAP95,	c.272_273insAATTAAAGATAATGCGGTTCAGG	p.Ser103fs	273/2628	91/875	(CORT_0B07470|CORT_0B07470|1|1.00)	S. cerevisiae homolog KAP95 has role in phosphatidylcholine biosynthetic process, protein targeting to membrane, nuclear pore complex assembly, protein import into nucleus	;viable;	NULL|Importin-beta, N-terminal|Armadillo-type fold|Armadillo-like helical	|Cellular Component: nuclear pore (GO:0005643), Biological Process: intracellular protein transport (GO:0006886), Molecular Function: protein transporter activity (GO:0008565)|Molecular Function: binding (GO:0005488)
2_1759300_C_CCAAA	0	0	0.353553	0	0	0.447214	0.288675	0	0	0.267261	0	0	0	0	0.208514	0	0.5	0.5	1	0.377964	0.204124	0	Sample_425:0/1	2	1759300	1759300	1	C	CCAAA	frameshift_variant	HIGH	CORT_0B08500	CPAR2_107290	orf19.2455	YBR281C	,DUG2	c.2525_2528dupCAAA	p.Asn844fs	2529/2973	843/990	(CORT_0B08500|CORT_0B08500|1|1.00)	S. cerevisiae homolog DUG2 has omega peptidase activity, has role in glutathione catabolic process and localizes to cytoplasm, nucleus	NA	NULL|WD40-repeat-containing domain|WD40 repeat|Peptidase M20|WD40/YVTN repeat-like-containing domain|Peptidase M20, dimerisation|Glutathione degradosome, DUG2	|Molecular Function: protein binding (GO:0005515)|Biological Process: metabolic process (GO:0008152), Molecular Function: hydrolase activity (GO:0016787)|Molecular Function: hydrolase activity (GO:0016787)
2_2336508_A_G	0.57735	0.894427	0.53033	0.5	0.5	0	0	0	0	0	0	0.707107	0.866025	0.603023	0.417029	0	0	0	0	0.188982	0.306186	0	Sample_1799:1/1;Sample_423:1/1;Sample_428:1/1;Sample_434:1/1	2	2336508	2336508	1	A	G	start_lost	HIGH	CORT_0B11130	CPAR2_110020	orf19.6012	YOR296W	YOR296W,	c.2T>C	p.Met1?	3753-02-01	1/1250	(CORT_0B11130|CORT_0B11130|1|1.00)	hypothetical protein	;viable;	C2 calcium-dependent membrane targeting|Mammalian uncoordinated homology 13, domain 2|NULL|Mammalian uncoordinated homology 13, subgroup, domain 2|C2 membrane targeting protein|C2 calcium/lipid-binding domain, CaLB|Munc13 homology 1	Molecular Function: protein binding (GO:0005515)|
2_2353996_G_A	0.57735	0.894427	0.53033	0.5	0.5	0	0	0	0	0	0	0.707107	0.866025	0.603023	0.417029	0	0	0	0	0.188982	0.306186	0	Sample_1799:1/1;Sample_423:1/1;Sample_428:1/1;Sample_434:1/1	2	2353996	2353996	1	G	A	stop_gained	HIGH	CORT_0B11240	CPAR2_110130	orf19.3296	---		c.6G>A	p.Trp2*	6/1530	2/509	character(0)	hypothetical protein	NA	NULL
3_241809_GCAAATACGCAACCAGCAAATACGCAACCA_G	0.57735	0.894427	0.53033	0.5	0.5	0	0	0	0	0	0	0.707107	0.866025	0.603023	0.417029	0	0	0	0	0.188982	0.306186	0	Sample_1799:1/1;Sample_423:1/1;Sample_428:1/1;Sample_434:1/1	3	241809	241838	30	GCAAATACGCAACCAGCAAATACGCAACCA	G	frameshift_variant	HIGH	CORT_0C01140	CPAR2_808010	orf19.6171	YIL115C	NUP159,NUP159	c.1220_1248delCAAATACGCAACCAGCAAATACGCAACCA	p.Ala407fs	1220/3465	407/1154	(CORT_0C01140|CORT_0C01140|1|1.00)	hypothetical protein	;viable;	WD40/YVTN repeat-like-containing domain|NULL	Molecular Function: protein binding (GO:0005515)|
3_298488_C_A	0	0	0.353553	0	0	0.447214	0.288675	0	0	0.267261	0	0	0	0	0.208514	0	0.5	0.5	1	0.377964	0.204124	0	Sample_425:0/1	3	298488	298488	1	C	A	stop_gained	HIGH	CORT_0C01460	CPAR2_807670	orf19.1648	YNL250W	RAD50,RAD50	c.1797C>A	p.Tyr599*	1797/3909	599/1302	character(0)	putative DNA double-strand break repair factor	;UV resistance: decreased;|;vegetative growth: decreased rate;|;viable;|;viable;|hydrogen peroxide;oxidative stress resistance: decreased;|;chromosome segregation: abnormal;increased chromosome instability|tert-butyl hydroperoxide;oxidative stress resistance: decreased;|ethyl methanesulfonate;resistance to chemicals: decreased;|methyl methanesulfonate;resistance to chemicals: decreased;|camptothe…	NULL|Recombination/repair protein Rad50	|Molecular Function: ATP binding (GO:0005524), Biological Process: DNA repair (GO:0006281), Cellular Component: Mre11 complex (GO:0030870)
3_551074_TA_T	0	0	0.408248	0	0	0.258199	0.166667	0	0	0.154303	0.333333	0	0	0	0.240772	0	0.866025	0.866025	0	0.654654	0.353553	0	Sample_436:0/1;Sample_504:0/1;Sample_831:0/1	3	551074	551075	2	TA	T	frameshift_variant	HIGH	CORT_0C02530	CPAR2_806650	orf19.1375	---	LEU42	c.942delA	p.Glu315fs	942/1731	314/576	(CORT_0C02530|CORT_0C02530|1|1.00)	putative alpha-isopropylmalate synthase	;viable;	Pyruvate carboxyltransferase|Alpha-isopropylmalate/homocitrate synthase, conserved site|2-isopropylmalate synthase LeuA, allosteric (dimerisation) domain|NULL|2-isopropylmalate synthase|Aldolase-type TIM barrel	Molecular Function: catalytic activity (GO:0003824)|Biological Process: carboxylic acid metabolic process (GO:0019752), Molecular Function: transferase activity, transferring acyl groups, acyl groups converted into alkyl on transfer (GO:0046912)|Molecular Function: 2-isopropylmalate synthase activity (GO:0003852), Biological Process: leucine biosynthetic process (GO:0009098)|
3_971303_T_A	0	0	0	0	0	0	0	1	0	0	0.57735	0	0	0	0.208514	0.707107	0	0	0	0.377964	0.204124	1	Sample_185:1/1	3	971303	971303	1	T	A	stop_gained	HIGH	CORT_0C04260	CPAR2_404840	orf19.7417	YML028W	TSA1,TSA1	c.404T>A	p.Leu135*	404/591	135/196	character(0)	TSA/alkyl hydroperoxide peroxidase C (AhPC) family protein	Calcofluor White;resistance to chemicals: decreased;|;viable;|;viable;|;viable;|;viable;|hydrogen peroxide;hyphal growth: abnormal;increased induction of hyphal growth in response to H2O2|;inviable;|Congo Red;resistance to chemicals: decreased;	Thioredoxin-like fold|NULL|Peroxiredoxin, C-terminal|Alkyl hydroperoxide reductase subunit C/ Thiol specific antioxidant|Peroxiredoxin, AhpC-type	|Molecular Function: peroxiredoxin activity (GO:0051920), Biological Process: oxidation-reduction process (GO:0055114)|Molecular Function: antioxidant activity (GO:0016209), Molecular Function: oxidoreductase activity (GO:0016491), Biological Process: oxidation-reduction process (GO:0055114)
3_1016479_C_CAACAACAACAACAACAACAACAACAACAACA	0	0	0.474342	0	0	0.6	0.387298	0	0.447214	0.358569	0.258199	0	0	0.13484	0.373002	0	0.894427	0.894427	0.447214	0.676123	0.365148	0	Sample_425:0/1;Sample_435:0/1;Sample_436:0/1;Sample_504:0/1;Sample_831:0/1	3	1016479	1016479	1	C	CAACAACAACAACAACAACAACAACAACAACA	frameshift_variant	HIGH	CORT_0C04500	CPAR2_405090	orf19.1630	YML017W	,PSP2	c.1130_1131insACAACAACAACAACAACAACAACAACAACAA	p.Ser380fs	1131/2409	377/802	(CORT_0C04500|CORT_0C04500|1|1.00)	similar to C. parapsilosis CPAR2_405090 and C. albicans orf19.1630; hypothetical protein	NA	NULL|Nucleotide-binding, alpha-beta plait|RNA recognition motif domain	|Molecular Function: nucleotide binding (GO:0000166)|Molecular Function: nucleic acid binding (GO:0003676)
3_1062774_G_GATCTCCATTTTTGAACAATCGTTCTCCAAGTGACAATCAAATATTGCTTCCAAAGTGGAGCAGCGTAAGTGAACTTAGCCTCAGGATCTTCGTCTCTTGGGAGTTTGGACAATTCGGCTTCC	0	0	0.353553	0	0	0.447214	0.288675	0	0	0.267261	0	0	0	0	0.208514	0	0.5	0.5	1	0.377964	0.204124	0	Sample_425:1/1	3	1062774	1062774	1	G	GATCTCCATTTTTGAACAATCGTTCTCCAAGTGACAATCAAATATTGCTTCCAAAGTGGAGCAGCGTAAGTGAACTTAGCCTCAGGATCTTCGTCTCTTGGGAGTTTGGACAATTCGGCTTCC	frameshift_variant&stop_gained	HIGH	CORT_0C04700	CPAR2_405290	orf19.6000	YOR153W	CDR1,PDR5,CDR1	c.7_8insGGAAGCCGAATTGTCCAAACTCCCAAGAGACGAAGATCCTGAGGCTAAGTTCACTTACGCTGCTCCACTTTGGAAGCAATATTTGATTGTCACTTGGAGAACGATTGTTCAAAAATGGAGAT	p.Ser3fs	7/942	3/313	character(0)	gene extends across a gap in the genome sequence; similar to C. parapsilosis CPAR2_405290 and C. albicans CDR1; multidrug transporter of ATP-binding cassette (ABC) superfamily	brefeldin A;resistance to chemicals: decreased;|brefeldin A;resistance to chemicals: decreased;|brefeldin A;resistance to chemicals: increased;overexpression causes resistance to drugs including azoles, terbinafine, cerulenin, nigericin, and brefeldin A (but not polyene antibiotic drugs)|brefeldin A;resistance to chemicals: decreased;|ketoconazole;resistance to chemicals: decreased;D327N, D327A, …	NULL|ABC-2 type transporter	|Cellular Component: membrane (GO:0016020)
3_1158978_CTT_C	0	0	0.353553	0	0	0.447214	0.288675	0	0	0.267261	0	0	0	0	0.208514	0	0.5	0.5	1	0.377964	0.204124	0	Sample_425:0/1	3	1158978	1158980	3	CTT	C	frameshift_variant	HIGH	CORT_0C05050	CPAR2_405650	orf19.5954	YGR225W	,AMA1	c.1187_1188delAA	p.Lys396fs	1188/1500	396/499	(CORT_0C05050|CORT_0C05050|1|1.00)	S. cerevisiae homolog AMA1 has enzyme activator activity, has role in meiosis I, ascospore wall assembly, protein catabolic process and localizes to anaphase-promoting complex	NA	NULL|WD40-repeat-containing domain|WD40 repeat|WD40/YVTN repeat-like-containing domain	|Molecular Function: protein binding (GO:0005515)
3_1381308_T_TTTAAATAAGGA	0	0	0	0	0	0	0	1	0	0	0.57735	0	0	0	0.208514	0.707107	0	0	0	0.377964	0.204124	1	Sample_185:0/1	3	1381308	1381308	1	T	TTTAAATAAGGA	frameshift_variant&stop_gained	HIGH	CORT_0C06110	CPAR2_406690	orf19.2252	---		c.601_602insTCCTTATTTAA	p.Tyr201fs	601/1503	201/500	(CORT_0C06110|CORT_0C06110|1|1.00)	hypothetical protein	NA	Protein of unknown function DUF3112|NULL
3_1483172_G_GAAGTTTTAATGACAGCTGTTCAGATTTGAAAGAGGTTTCAGCGCGGCGAAGTTCAATTTATTCCCGCACATCCCAGTAAAGATATTTTTCAACACTTTTTAGAGAGTGA	0.57735	0.447214	0	1	1	0	0	0	0	0	0	0	0.57735	0.301511	0.208514	0	0	0	0	0	0.204124	0	Sample_423:0/1	3	1483172	1483172	1	G	GAAGTTTTAATGACAGCTGTTCAGATTTGAAAGAGGTTTCAGCGCGGCGAAGTTCAATTTATTCCCGCACATCCCAGTAAAGATATTTTTCAACACTTTTTAGAGAGTGA	frameshift_variant&stop_gained	HIGH	CORT_0C06620	CPAR2_407250	---	---		c.316_317insTCACTCTCTAAAAAGTGTTGAAAAATATCTTTACTGGGATGTGCGGGAATAAATTGAACTTCGCCGCGCTGAAACCTCTTTCAAATCTGAACAGCTGTCATTAAAACTT	p.Ala106fs	316/393	106/130	(CORT_0C06620|CORT_0C06620|1|1.00)	member of Jen family, homolog of C. albicans JEN1	NA	NA	NA
4_105897_GTA_G	0	0	0	0	0	0	0	1	0	0	0.57735	0	0	0	0.208514	0.707107	0	0	0	0.377964	0.204124	1	Sample_185:1/1	4	105897	105899	3	GTA	G	frameshift_variant	HIGH	CORT_0D00770	---	---	---		c.143_144delTA	p.Val48fs	144/210	48/69	(CORT_0D00770|CORT_0D00770|1|1.00)	hypothetical protein	NA	NA	NA
4_143813_T_TAAA	0	0	0.474342	0	0	0.4	0.387298	0	0	0.358569	0.258199	0	0	0	0.373002	0	0.894427	0.894427	0.447214	0.845154	0.456435	0	Sample_425:0/1;Sample_436:1/1;Sample_504:0/1;Sample_831:0/1;Sample_B-8323:0/1	4	143813	143813	1	T	TAAA	start_lost&disruptive_inframe_insertion	HIGH	CORT_0D00930	CPAR2_200840	orf19.6602	YLR201C	COQ9,	c.2_3insAAA	p.Met1delinsIleLys	3/855	1/284	(CORT_0D00930|CORT_0D00930|1|1.00)	S. cerevisiae homolog COQ9 has role in aerobic respiration, ubiquinone biosynthetic process and localizes to mitochondrial inner membrane	;viable;|;invasive growth: decreased;	Ubiquinone biosynthesis protein COQ9|COQ9|NULL	Biological Process: ubiquinone biosynthetic process (GO:0006744)|
4_245829_A_T	0	0	0.353553	0	0	0.447214	0.288675	0	0	0.267261	0	0	0	0	0.208514	0	0.5	0.5	1	0.377964	0.204124	0	Sample_425:0/1	4	245829	245829	1	A	T	stop_gained	HIGH	CORT_0D01450	CPAR2_201410	orf19.6349	---	RVS162	c.168T>A	p.Tyr56*	168/858	56/285	character(0)	protein containing a BAR domain, which is found in proteins involved in membrane curvature	;viable;|;viable;	BAR domain|NULL	Molecular Function: protein binding (GO:0005515), Cellular Component: cytoplasm (GO:0005737)|
4_804914_C_CT	0.57735	0.894427	0.53033	0.5	0.5	0	0	0	0	0	0	0.707107	0.866025	0.603023	0.417029	0	0	0	0	0.188982	0.306186	0	Sample_1799:0/1;Sample_423:0/1;Sample_428:1/1;Sample_434:0/1	4	804914	804914	1	C	CT	frameshift_variant	HIGH	CORT_0D04160	CPAR2_204060	orf19.6316.4	YLR363W-A	,YLR363W-A	c.61dupA	p.Ser21fs	61/381	21/126	(CORT_0D04160|CORT_0D04160|1|1.00)	putative nuclear protein	NA	Uncharacterised protein family UPF0390
4_1214063_G_A	0	0	0.353553	0	0	0.447214	0.288675	0	0	0.267261	0	0	0	0	0.208514	0	0.5	0.5	1	0.377964	0.204124	0	Sample_425:0/1	4	1214063	1214063	1	G	A	stop_gained	HIGH	CORT_0D06060	CPAR2_205920	orf19.730	YFL047W	,RGD2	c.1741C>T	p.Gln581*	1741/2553	581/850	character(0)	S. cerevisiae homolog RGD2 has Rho GTPase activator activity, has role in small GTPase mediated signal transduction and localizes to cytoplasm, cellular bud neck	NA	Rho GTPase activation protein|NULL|Rho GTPase-activating protein domain|DEP domain|Winged helix-turn-helix transcription repressor DNA-binding|Fps/Fes/Fer/CIP4 homology	Cellular Component: intracellular (GO:0005622), Biological Process: signal transduction (GO:0007165)||Biological Process: intracellular signal transduction (GO:0035556)
4_1295047_TAACA_T	0	0	0.353553	0	0	0.447214	0.288675	0	0	0.267261	0	0	0	0	0.208514	0	0.5	0.5	1	0.377964	0.204124	0	Sample_425:0/1	4	1295047	1295051	5	TAACA	T	frameshift_variant	HIGH	CORT_0D06340	CPAR2_502850	orf19.6923.1	---		c.96_99delTGTT	p.Val33fs	99/291	32/96	(CORT_0D06340|CORT_0D06340|1|1.00)	hypothetical protein	NA	NULL
4_1409415_AC_A	0	0	0	0	0	0.447214	0.288675	0	1	0.267261	0	0	0	0.301511	0.208514	0	0	0	0	0	0	0	Sample_435:0/1	4	1409415	1409416	2	AC	A	frameshift_variant	HIGH	CORT_0D06760	CPAR2_503290	orf19.6936	YPL153C	RAD53,RAD53	c.1877delC	p.Thr626fs	1877/2136	626/711	(CORT_0D06760|CORT_0D06760|1|1.00)	putative component of cell cycle checkpoint	;vegetative growth: decreased rate;|;viable;|;viable;|;hyphal growth: decreased;|methyl methanesulfonate;resistance to chemicals: decreased;|hydroxyurea;resistance to chemicals: decreased;	Serine/threonine-protein kinase, active site|Forkhead-associated (FHA) domain|NULL|Protein kinase-like domain|Protein kinase, catalytic domain|Protein kinase, ATP binding site|Serine/threonine- / dual-specificity protein kinase, catalytic domain|SMAD/FHA domain	Molecular Function: protein serine/threonine kinase activity (GO:0004674), Biological Process: protein phosphorylation (GO:0006468)|Molecular Function: protein binding (GO:0005515)||Molecular Function: transferase activity, transferring phosphorus-containing groups (GO:0016772)|Molecular Function: protein kinase activity (GO:0004672), Molecular Function: ATP binding (GO:0005524), Biological Proce…
5_116860_T_TGGAAATTGTGTCTTTTAAA	0	0	0	0	0	0.447214	0.288675	0	1	0.267261	0	0	0	0.301511	0.208514	0	0	0	0	0	0	0	Sample_435:0/1	5	116860	116860	1	T	TGGAAATTGTGTCTTTTAAA	frameshift_variant	HIGH	CORT_0E00570	CPAR2_400440	orf19.4595	---		c.1508_1509insGGAAATTGTGTCTTTTAAA	p.Ser504fs	1509/1515	503/504	character(0)	hypothetical protein	NA	NULL
5_343567_CA_C	0.57735	0.894427	0.53033	0.5	0.5	0	0	0	0	0	0	0.707107	0.866025	0.603023	0.417029	0	0	0	0	0.188982	0.306186	0	Sample_1799:0/1;Sample_423:0/1;Sample_428:1/1;Sample_434:0/1	5	343567	343568	2	CA	C	frameshift_variant	HIGH	CORT_0E01590	CPAR2_401540	orf19.2686	YJL172W	CPS1,	c.408delT	p.Glu137fs	408/1299	136/432	(CORT_0E01590|CORT_0E01590|1|1.00)	gene starts within a gap in the genome sequence; similar to C. parapsilosis CPAR2_401540 and C. albicans orf19.2686; S. cerevisiae homolog CPS1 has carboxypeptidase activity, has role in proteolysis involved in cellular protein catabolic process, nitrogen compound metabolic process and localizes to fungal-type vacuole lumen	;competitive fitness: normal;R\I score is the median log2(R/I) value representing abundance of the mutant in recovered pool relative to inoculum|;colony appearance: normal;Morphology (M) score represents relative sizes of central and peripheral regions of colony|;vegetative growth: normal rate;|;viable;	NULL|Peptidase M20, dimerisation|Peptidase M20|ArgE/DapE/ACY1/CPG2/YscS, conserved site	|Molecular Function: hydrolase activity (GO:0016787)|Biological Process: metabolic process (GO:0008152), Molecular Function: hydrolase activity (GO:0016787)|Biological Process: proteolysis (GO:0006508), Molecular Function: metallopeptidase activity (GO:0008237)
5_343750_T_TG	0.57735	0.894427	0.53033	0.5	0.5	0	0	0	0	0	0	0.707107	0.866025	0.603023	0.417029	0	0	0	0	0.188982	0.306186	0	Sample_1799:0/1;Sample_423:0/1;Sample_428:1/1;Sample_434:0/1	5	343750	343750	1	T	TG	frameshift_variant	HIGH	CORT_0E01590	CPAR2_401540	orf19.2686	YJL172W	CPS1,	c.225_226insC	p.Arg76fs	225/1299	75/432	(CORT_0E01590|CORT_0E01590|1|1.00)	gene starts within a gap in the genome sequence; similar to C. parapsilosis CPAR2_401540 and C. albicans orf19.2686; S. cerevisiae homolog CPS1 has carboxypeptidase activity, has role in proteolysis involved in cellular protein catabolic process, nitrogen compound metabolic process and localizes to fungal-type vacuole lumen	;competitive fitness: normal;R\I score is the median log2(R/I) value representing abundance of the mutant in recovered pool relative to inoculum|;colony appearance: normal;Morphology (M) score represents relative sizes of central and peripheral regions of colony|;vegetative growth: normal rate;|;viable;	NULL|Peptidase M20, dimerisation|Peptidase M20|ArgE/DapE/ACY1/CPG2/YscS, conserved site	|Molecular Function: hydrolase activity (GO:0016787)|Biological Process: metabolic process (GO:0008152), Molecular Function: hydrolase activity (GO:0016787)|Biological Process: proteolysis (GO:0006508), Molecular Function: metallopeptidase activity (GO:0008237)
5_418684_T_A	0.57735	0.894427	0.53033	0.5	0.5	0	0	0	0	0	0	0.707107	0.866025	0.603023	0.417029	0	0	0	0	0.188982	0.306186	0	Sample_1799:0/1;Sample_423:0/1;Sample_428:1/1;Sample_434:0/1	5	418684	418684	1	T	A	stop_gained	HIGH	CORT_0E01950	CPAR2_401900	orf19.2916	---		c.643A>T	p.Lys215*	643/648	215/215	character(0)	hypothetical protein	clotrimazole (75 uM);resistance to chemicals: decreased;confirmation of mutant phenotypes for heterozygous transposon insertion strains showing sensitivity in a large-scale assay	NULL
5_420192_G_A	0	0	0	0	0	0	0	1	0	0	0.57735	0	0	0	0.208514	0.707107	0	0	0	0.377964	0.204124	1	Sample_185:0/1	5	420192	420192	1	G	A	stop_gained	HIGH	CORT_0E01960	CPAR2_401910	orf19.2915	YER005W	YND1,	c.1366C>T	p.Gln456*	1366/2064	456/687	character(0)	S. cerevisiae homolog YND1 has nucleoside-diphosphatase activity, nucleoside-triphosphatase activity, has role in protein glycosylation and localizes to microsome, COPI-coated vesicle, Golgi apparatus, membrane	;viable;	Nucleoside phosphatase GDA1/CD39|NULL	Molecular Function: hydrolase activity (GO:0016787)|
5_696030_T_A	0	0	0.353553	0	0	0.447214	0.288675	0	0	0.267261	0	0	0	0	0.208514	0	0.5	0.5	1	0.377964	0.204124	0	Sample_425:0/1	5	696030	696030	1	T	A	stop_gained	HIGH	CORT_0E03200	CPAR2_403160	---	---		c.95T>A	p.Leu32*	95/540	32/179	character(0)	hypothetical protein	NA	NA	NA
5_966829_C_CAGGGAAACCAATAACTCGAGATCGCGACGTTTAT	0	0	0.353553	0	0	0.447214	0.288675	0	0	0.267261	0	0	0	0	0.208514	0	0.5	0.5	1	0.377964	0.204124	0	Sample_425:1/1	5	966829	966829	1	C	CAGGGAAACCAATAACTCGAGATCGCGACGTTTAT	frameshift_variant&stop_gained	HIGH	CORT_0E04330	---	---	---		c.8_9insATAAACGTCGCGATCTCGAGTTATTGGTTTCCCT	p.Ser4fs	8/240	1979-03-01	character(0)	gene starts within a gap in the genome sequence	NA	NULL
5_976199_ATCGC_A	0	0	0.408248	0	0	0.258199	0.166667	0	0	0.154303	0.333333	0	0	0	0.240772	0	0.866025	0.866025	0.57735	0.654654	0.353553	0	Sample_425:0/1;Sample_504:0/1;Sample_831:0/1	5	976199	976203	5	ATCGC	A	frameshift_variant	HIGH	CORT_0E04360	---	---	---		c.325_328delTCGC	p.Ser109fs	325/1263	109/420	(CORT_0E04360|CORT_0E04360|1|1.00)	hypothetical protein	NA	NA	NA
5_976302_A_T	0.57735	0.447214	0	1	1	0	0	0	0	0	0	0	0.57735	0.301511	0.208514	0	0	0	0	0	0.204124	0	Sample_423:0/1	5	976302	976302	1	A	T	stop_gained	HIGH	CORT_0E04360	---	---	---		c.427A>T	p.Arg143*	427/1263	143/420	character(0)	hypothetical protein	NA	NA	NA
6_201071_G_A	0	0	0	0	0	0	0	1	0	0	0.57735	0	0	0	0.208514	0.707107	0	0	0	0.377964	0.204124	1	Sample_185:0/1	6	201071	201071	1	G	A	stop_gained	HIGH	CORT_0F01150	CPAR2_101060	orf19.3969	YGR249W	MGA1,SFL2	c.865C>T	p.Gln289*	865/3054	289/1017	character(0)	probable transcription factor	;viable;|;viable;|;invasive growth: absent;|;colony shape: abnormal;colonies are smooth|;vegetative growth: normal rate;|;virulence: normal;|;invasive growth: decreased;|;colony shape: abnormal;colonies are wrinkled, like wild-type, but lack the peripheral fringe of hyphae|;filamentous growth: increased;filaments are formed under conditions normally promoting only yeast-form growth|;germ tube for…	Heat shock factor (HSF)-type, DNA-binding|NULL|Winged helix-turn-helix transcription repressor DNA-binding	Molecular Function: sequence-specific DNA binding transcription factor activity (GO:0003700), Cellular Component: nucleus (GO:0005634), Biological Process: regulation of transcription, DNA-dependent (GO:0006355), Molecular Function: sequence-specific DNA binding (GO:0043565)|
6_250009_ATT_A	0	0	0	0	0	0.447214	0.288675	0	1	0.267261	0	0	0	0.301511	0.208514	0	0	0	0	0	0	0	Sample_435:0/1	6	250009	250011	3	ATT	A	frameshift_variant	HIGH	CORT_0F01350	CPAR2_101260	orf19.4279	---	MNN1	c.889_890delAA	p.Asn297fs	890/2565	297/854	(CORT_0F01350|CORT_0F01350|1|1.00)	putative alpha-1,3-mannosyltransferase, a component of mannosyltransferase complex	;viable;	Alpha-mannosyltransferase|NULL	Biological Process: protein glycosylation (GO:0006486)|
6_439073_A_ACCAC	0	0.2	0.632456	0	0	0.4	0.258199	0	0	0.239046	0.258199	0	0	0	0.373002	0	0.894427	0.894427	0.447214	0.676123	0.456435	0	Sample_425:1/1;Sample_426:0/1;Sample_436:1/1;Sample_504:1/1;Sample_831:1/1	6	439073	439073	1	A	ACCAC	frameshift_variant	HIGH	CORT_0F02080	CPAR2_601080	orf19.1093	YER109C	FLO8,FLO8	c.1150_1151insCACC	p.Gln384fs	1151/3081	384/1026	(CORT_0F02080|CORT_0F02080|1|1.00)	putative transcription factor, similar to S. cerevisiae Flo8p	;hyphal growth: absent;deletion of entire gene or of LUFS domain|;hyphal growth: decreased;partial defect|;viable;|;viable;|;viable;|;filamentous growth: increased;exhibits microaerophilic growth|;virulence: decreased;|;virulence: absent;|;filamentous growth: absent;|;filamentous growth: absent;|;virulence: decreased;	LisH dimerisation motif, subgroup|LisH dimerisation motif	|Molecular Function: protein binding (GO:0005515)
7_11933_ATAACCTC_A	0	0	0.408248	0	0	0.258199	0.166667	0	0	0.154303	0.333333	0	0	0	0.240772	0	0.866025	0.866025	0	0.654654	0.353553	0	Sample_436:0/1;Sample_504:0/1;Sample_831:0/1	7	11933	11940	8	ATAACCTC	A	frameshift_variant	HIGH	CORT_0G00140	CPAR2_700030	---	---		c.1362_1368delTAACCTC	p.Asp454fs	1362/4437	454/1478	(CORT_0G00140|CORT_0G00140|1|1.00)	hypothetical protein	NA	ABC transporter-like|NULL|ABC transporter, conserved site|AAA+ ATPase domain|CDR ABC transporter|Pleiotropic drug resistance protein PDR|ABC-2 type transporter	Molecular Function: ATP binding (GO:0005524), Molecular Function: ATPase activity (GO:0016887)||Molecular Function: nucleotide binding (GO:0000166), Molecular Function: nucleoside-triphosphatase activity (GO:0017111)|Molecular Function: ATP binding (GO:0005524), Biological Process: transport (GO:0006810), Cellular Component: integral to membrane (GO:0016021), Molecular Function: ATPase activity, …
7_11948_A_AT	0	0	0.408248	0	0	0.258199	0.166667	0	0	0.154303	0.333333	0	0	0	0.240772	0	0.866025	0.866025	0	0.654654	0.353553	0	Sample_436:0/1;Sample_504:0/1;Sample_831:0/1	7	11948	11948	1	A	AT	frameshift_variant	HIGH	CORT_0G00140	CPAR2_700030	---	---		c.1376_1377insT	p.Lys459fs	1377/4437	459/1478	(CORT_0G00140|CORT_0G00140|1|1.00)	hypothetical protein	NA	ABC transporter-like|NULL|ABC transporter, conserved site|AAA+ ATPase domain|CDR ABC transporter|Pleiotropic drug resistance protein PDR|ABC-2 type transporter	Molecular Function: ATP binding (GO:0005524), Molecular Function: ATPase activity (GO:0016887)||Molecular Function: nucleotide binding (GO:0000166), Molecular Function: nucleoside-triphosphatase activity (GO:0017111)|Molecular Function: ATP binding (GO:0005524), Biological Process: transport (GO:0006810), Cellular Component: integral to membrane (GO:0016021), Molecular Function: ATPase activity, …
7_11991_T_TCC	0.57735	0.447214	0	1	1	0	0	0	0	0	0	0	0.57735	0.301511	0.208514	0	0	0	0	0	0.204124	0	Sample_423:0/1	7	11991	11991	1	T	TCC	frameshift_variant	HIGH	CORT_0G00140	CPAR2_700030	---	---		c.1419_1420insCC	p.Val474fs	1420/4437	474/1478	(CORT_0G00140|CORT_0G00140|1|1.00)	hypothetical protein	NA	ABC transporter-like|NULL|ABC transporter, conserved site|AAA+ ATPase domain|CDR ABC transporter|Pleiotropic drug resistance protein PDR|ABC-2 type transporter	Molecular Function: ATP binding (GO:0005524), Molecular Function: ATPase activity (GO:0016887)||Molecular Function: nucleotide binding (GO:0000166), Molecular Function: nucleoside-triphosphatase activity (GO:0017111)|Molecular Function: ATP binding (GO:0005524), Biological Process: transport (GO:0006810), Cellular Component: integral to membrane (GO:0016021), Molecular Function: ATPase activity, …
7_48231_T_TAATACCGATCACAAAGAGTATAGTTGTGTAGAATTAGA	0	0	0	0	0	0.447214	0.288675	0	1	0.267261	0	0	0	0.301511	0.208514	0	0	0	0	0	0	0	Sample_435:0/1	7	48231	48231	1	T	TAATACCGATCACAAAGAGTATAGTTGTGTAGAATTAGA	frameshift_variant	HIGH	CORT_0G00350	CPAR2_700250	orf19.5030	YDR068W	,DOS2	c.242_243insTCTAATTCTACACAACTATACTCTTTGTGATCGGTATT	p.Gln81fs	242/744	81/247	(CORT_0G00350|CORT_0G00350|1|1.00)	hypothetical protein	NA	NA	NA
7_606336_AAATG_A	0	0	0.353553	0	0	0.447214	0.288675	0	0	0.267261	0	0	0	0	0.208514	0	0.5	0.5	1	0.377964	0.204124	0	Sample_425:0/1	7	606336	606340	5	AAATG	A	frameshift_variant	HIGH	CORT_0G03020	CPAR2_702910	orf19.7159	YMR185W	,RTP1	c.1624_1627delAATG	p.Asn542fs	1624/2895	542/964	(CORT_0G03020|CORT_0G03020|1|1.00)	hypothetical protein	NA	NULL|Domain of unknown function DUF2411|Armadillo-type fold|Armadillo-like helical	|Molecular Function: binding (GO:0005488)
7_609043_TTC_T	0	0	0	0	0	0	0	1	0	0	0.57735	0	0	0	0.208514	0.707107	0	0	0	0.377964	0.204124	1	Sample_185:0/1	7	609043	609045	3	TTC	T	frameshift_variant	HIGH	CORT_0G03030	CPAR2_702920	---	---		c.253_254delGA	p.Glu85fs	254/1674	85/557	(CORT_0G03030|CORT_0G03030|1|1.00)	hypothetical protein	NA	NULL|Major facilitator superfamily domain, general substrate transporter
7_777244_T_TACCTCAGCTTCCATCAAGTGCTTACATTCTACCCCACCGATTTCATTTTGGAGAACCTATTCTCATCATCGGCAGTTAGCATCTTGTGTCTAAGGATATTGACCTTGAATGTGCATCAATCAGAGACGCG	0	0	0	0	0	0.447214	0.288675	0	1	0.267261	0	0	0	0.301511	0.208514	0	0	0	0	0	0	0	Sample_435:1/1	7	777244	777244	1	T	TACCTCAGCTTCCATCAAGTGCTTACATTCTACCCCACCGATTTCATTTTGGAGAACCTATTCTCATCATCGGCAGTTAGCATCTTGTGTCTAAGGATATTGACCTTGAATGTGCATCAATCAGAGACGCG	frameshift_variant	HIGH	CORT_0G03775	---	---	---		c.242_243insCCTCAGCTTCCATCAAGTGCTTACATTCTACCCCACCGATTTCATTTTGGAGAACCTATTCTCATCATCGGCAGTTAGCATCTTGTGTCTAAGGATATTGACCTTGAATGTGCATCAATCAGAGACGCGA	p.???82fs	243/249	81/82	character(0)	gene ends within a gap in the genome sequence	NA	NA	NA
7_899426_C_T	0	0	0	0	0	0	0	1	0	0	0.57735	0	0	0	0.208514	0.707107	0	0	0	0.377964	0.204124	1	Sample_185:1/1	7	899426	899426	1	C	T	stop_gained	HIGH	CORT_0G04310	CPAR2_704130	orf19.5133	---	ZCF29	c.2440C>T	p.Gln814*	2440/3111	814/1036	character(0)	predicted zinc-finger protein	fenpropimorph;resistance to chemicals: increased;strongly resistant|rapamycin;resistance to chemicals: decreased;strongly sensitive|caffeine;resistance to chemicals: decreased;severely sensitive|menadione;oxidative stress resistance: decreased;strongly sensitive|;viable;|;colony appearance: abnormal;decreased colony wrinkling|;hyphal growth: decreased;	Zn(2)-C6 fungal-type DNA-binding domain|NULL	Molecular Function: sequence-specific DNA binding RNA polymerase II transcription factor activity (GO:0000981), Cellular Component: nucleus (GO:0005634), Biological Process: regulation of transcription, DNA-dependent (GO:0006355), Molecular Function: zinc ion binding (GO:0008270)|
8_19953_C_A	0	0	0	0	0	0.447214	0.288675	0	1	0.267261	0	0	0	0.301511	0.208514	0	0	0	0	0	0	0	Sample_435:0/1	8	19953	19953	1	C	A	stop_gained	HIGH	CORT_0H00190	CPAR2_300130	orf19.7112	---	FRP2	c.1619C>A	p.Ser540*	1619/2016	540/671	character(0)	putative ferric reductase	;viable;|;competitive fitness: normal;R\I score is the median log2(R/I) value representing abundance of the mutant in recovered pool relative to inoculum|;colony appearance: normal;Morphology (M) score represents relative sizes of central and peripheral regions of colony|;vegetative growth: normal rate;|;viable;	NULL|Ferric reductase, NAD binding|Ferric reductase transmembrane component-like domain|FAD-binding 8	|Molecular Function: oxidoreductase activity (GO:0016491), Biological Process: oxidation-reduction process (GO:0055114)
8_120093_TTC_T	0	0	0	0	0	0	0	1	0	0	0.57735	0	0	0	0.208514	0.707107	0	0	0	0.377964	0.204124	1	Sample_185:0/1	8	120093	120095	3	TTC	T	frameshift_variant	HIGH	CORT_0H00760	CPAR2_300730	orf19.6577	YLL028W	TPO1,FLU1	c.478_479delGA	p.Glu160fs	479/1743	160/580	(CORT_0H00760|CORT_0H00760|1|1.00)	multidrug efflux pump of the plasma membrane	;viable;|;viable;|;viable;|mycophenolic acid;resistance to chemicals: decreased;|;toxin resistance: decreased;human salivary histatin 5|spermidine;chemical compound excretion: decreased;	NULL|Major facilitator superfamily|Major facilitator superfamily domain|Major facilitator superfamily domain, general substrate transporter	|Cellular Component: integral to membrane (GO:0016021), Biological Process: transmembrane transport (GO:0055085)
8_123785_A_AAT	0	0	0.353553	0	0	0.447214	0.288675	0	0	0.267261	0	0	0	0	0.208514	0	0.5	0.5	1	0.377964	0.204124	0	Sample_425:0/1	8	123785	123785	1	A	AAT	frameshift_variant	HIGH	CORT_0H00770	CPAR2_300760	---	---		c.522_523insAT	p.Leu175fs	522/1854	174/617	(CORT_0H00770|CORT_0H00770|1|1.00)	hypothetical protein	NA	NULL|Major facilitator superfamily|Major facilitator superfamily domain|Major facilitator superfamily domain, general substrate transporter	|Cellular Component: integral to membrane (GO:0016021), Biological Process: transmembrane transport (GO:0055085)
8_268957_G_A	0	0	0.353553	0	0	0.447214	0.288675	0	0	0.267261	0	0	0	0	0.208514	0	0.5	0.5	1	0.377964	0.204124	0	Sample_425:0/1	8	268957	268957	1	G	A	stop_gained	HIGH	CORT_0H01350	CPAR2_301350	orf19.6579	---		c.864G>A	p.Trp288*	864/1263	288/420	character(0)	hypothetical protein	NA	NA	NA
8_407509_ACTACATT_A	0.57735	0.447214	0	1	1	0	0	0	0	0	0	0	0.57735	0.301511	0.208514	0	0	0	0	0	0.204124	0	Sample_423:0/1	8	407509	407516	8	ACTACATT	A	frameshift_variant	HIGH	CORT_0H01970	---	---	---		c.54_60delCTACATT	p.Asp18fs	54/198	18/65	(CORT_0H01970|CORT_0H01970|1|1.00)	hypothetical protein	NA	NA	NA
8_427294_T_TA	0.235702	0.365148	0.433013	0.204124	0.204124	0.273861	0.53033	0.204124	0	0.600099	0.353553	0.144338	0.235702	0.492366	0.808694	0.144338	0.306186	0.306186	0.204124	0.46291	0.916667	0.204124	Sample_151:0/1;Sample_1540:0/1;Sample_1799:1/1;Sample_1825:0/1;Sample_185:0/1;Sample_282:1/1;Sample_320:1/1;Sample_421:0/1;Sample_422:0/1;Sample_423:1/1;Sample_424:1/1;Sample_425:1/1;Sample_426:1/1;Sample_427:1/1;Sample_433:0/1;Sample_434:1/1;Sample_437:0/1;Sample_498:0/1;Sample_504:1/1;Sample_599:0/1;Sample_748:1/1;Sample_831:1/1;Sample_B-8274:0/1;Sample_B-8323:1/1	8	427294	427294	1	T	TA	frameshift_variant	HIGH	CORT_0H02030	---	---	---		c.76dupT	p.Tyr26fs	76/1380	26/459	(CORT_0H02030|CORT_0H02030|1|1.00)	hypothetical protein	NA	NULL
8_541603_C_T	0	0	0	0	0	0	0	1	0	0	0.57735	0	0	0	0.208514	0.707107	0	0	0	0.377964	0.204124	1	Sample_185:0/1	8	541603	541603	1	C	T	stop_gained	HIGH	CORT_0H02450	CPAR2_600340	orf19.1084	YCR093W	CDC39,CDC39	c.3580C>T	p.Gln1194*	3580/5886	1194/1961	character(0)	protein similar to S. cerevisiae Cdc39p, which is part of the CCR4-NOT transcription regulatory complex	;hyphal growth: absent;|;colony appearance: abnormal;colonies are smooth|;filamentous growth: decreased;heterozygous transposon insertion|;viable;|;invasive growth: decreased;	NULL|CCR4-Not complex, Not1 subunit, domain of unknown function DUF3819|CCR4-Not complex component, Not1, C-terminal
8_556075_AC_A	0	0	0.474342	0	0	0.4	0.387298	0	0	0.358569	0.258199	0	0	0	0.373002	0	0.894427	0.894427	0.447214	0.845154	0.456435	0	Sample_425:0/1;Sample_436:0/1;Sample_504:0/1;Sample_831:0/1;Sample_B-8323:0/1	8	556075	556076	2	AC	A	frameshift_variant	HIGH	CORT_0H02530	---	---	---		c.79delG	p.Val27fs	79/450	27/149	(CORT_0H02530|CORT_0H02530|1|1.00)	CDS	NA	NULL

## Sheet: raw_data
VarID	2% xylose	2% starch	C. source absent	BPS 300 uM	BPS 500 uM	Congo Red 250 ug/ml	Congo Red 350 ug/ml	Caffeine 30 mM	CFW 15 uM	CFW 20 uM	Caspofungin 0.3 ug/ml	SDS 0.04 %	SDS 0.08 %	CdCl2 0.1 mM	CdCl2 0.3 mM	CoCl2 4 mM	Fluconazole 8 ug/ml	Fluconazole 10 ug/ml	Ketoconazole 0.1 ug/ml	Ketoconazole 0.2 ug/ml	Ketoconazole 0.5 ug/ml	Nystatin 14 ug/ml	SampleInfo	chr	start	end	width	ref	alt	impact	consequence	gene	cpar	calb	scer	scername	hgvsc	hgvsp	cdspos	aapos	LOF	GeneInfo	phenotype	domains	GO	Proximity Filter
1_14922_T_TG	0.235702	0.365148	0.505181	0.204124	0.204124	0.365148	0.53033	0.204124	0.204124	0.654654	0.353553	0.144338	0.235702	0.492366	0.808694	0.144338	0.408248	0.408248	0.204124	0.540062	0.875	0.204124	Sample_151:1/1;Sample_1540:1/1;Sample_1799:1/1;Sample_1825:1/1;Sample_185:1/1;Sample_282:1/1;Sample_320:1/1;Sample_421:1/1;Sample_422:1/1;Sample_423:1/1;Sample_425:1/1;Sample_426:1/1;Sample_427:1/1;Sample_433:1/1;Sample_434:1/1;Sample_435:1/1;Sample_436:1/1;Sample_437:1/1;Sample_498:0/1;Sample_504:1/1;Sample_599:1/1;Sample_831:1/1;Sample_B-8274:1/1;Sample_B-8323:1/1	1	14922	14922	1	T	TG	frameshift_variant	HIGH	CORT_0A00180	CPAR2_800070	orf19.5144	---		c.30dupC	p.Lys11fs	30/720	10/239	character(0)	protein similar to S. cerevisiae Wsc2p, which has roles in stress- and cell-wall-related processes	NA	NULL		FALSE
1_56476_GAA_G	0.34641	0.447214	0.565685	0.2	0.2	0.357771	0.519615	0.2	0.2	0.641427	0.34641	0.282843	0.34641	0.54272	0.834058	0.141421	0.4	0.4	0.2	0.52915	0.898146	0.2	Sample_151:1/1;Sample_1540:1/1;Sample_1799:1/1;Sample_1825:1/1;Sample_185:1/1;Sample_282:1/1;Sample_320:1/1;Sample_421:1/1;Sample_422:1/1;Sample_423:1/1;Sample_425:1/1;Sample_426:1/1;Sample_427:1/1;Sample_428:1/1;Sample_433:1/1;Sample_434:1/1;Sample_435:1/1;Sample_436:1/1;Sample_437:1/1;Sample_498:0/1;Sample_504:1/1;Sample_599:1/1;Sample_831:1/1;Sample_B-8274:1/1;Sample_B-8323:1/1	1	56476	56478	3	GAA	G	frameshift_variant	HIGH	CORT_0A00350	CPAR2_800240	orf19.3746	---		c.1826_1827delTT	p.Leu609fs	1827/2109	609/702	(CORT_0A00350|CORT_0A00350|1|1.00)	putative oligopeptide transporter	NA	NULL|Oligopeptide transporter OPT superfamily	|Biological Process: transmembrane transport (GO:0055085)	TRUE
1_56480_A_ATG	0.34641	0.447214	0.565685	0.2	0.2	0.357771	0.519615	0.2	0.2	0.641427	0.34641	0.282843	0.34641	0.54272	0.834058	0.141421	0.4	0.4	0.2	0.52915	0.898146	0.2	Sample_151:1/1;Sample_1540:1/1;Sample_1799:1/1;Sample_1825:1/1;Sample_185:1/1;Sample_282:1/1;Sample_320:1/1;Sample_421:1/1;Sample_422:1/1;Sample_423:1/1;Sample_425:1/1;Sample_426:1/1;Sample_427:1/1;Sample_428:1/1;Sample_433:1/1;Sample_434:1/1;Sample_435:1/1;Sample_436:1/1;Sample_437:1/1;Sample_498:0/1;Sample_504:1/1;Sample_599:1/1;Sample_831:1/1;Sample_B-8274:1/1;Sample_B-8323:1/1	1	56480	56480	1	A	ATG	frameshift_variant	HIGH	CORT_0A00350	CPAR2_800240	orf19.3746	---		c.1823_1824insCA	p.Leu609fs	1823/2109	608/702	(CORT_0A00350|CORT_0A00350|1|1.00)	putative oligopeptide transporter	NA	NULL|Oligopeptide transporter OPT superfamily	|Biological Process: transmembrane transport (GO:0055085)	TRUE
1_57028_T_TAGTCAATGGAATCAAAAATACGAAGTTGATACCCAAGGCAAAGAAGATACCCCAGACAGGAGTTTGTGCTGGATACACCTTGACACACAAGATGGCCAAAACAAGCGAAATG	0	0	0	0	0	0.447214	0.288675	0	1	0.267261	0	0	0	0.301511	0.208514	0	0	0	0	0	0	0	Sample_435:0/1	1	57028	57028	1	T	TAGTCAATGGAATCAAAAATACGAAGTTGATACCCAAGGCAAAGAAGATACCCCAGACAGGAGTTTGTGCTGGATACACCTTGACACACAAGATGGCCAAAACAAGCGAAATG	frameshift_variant	HIGH	CORT_0A00350	CPAR2_800240	orf19.3746	---		c.1275_1276insCATTTCGCTTGTTTTGGCCATCTTGTGTGTCAAGGTGTATCCAGCACAAACTCCTGTCTGGGGTATCTTCTTTGCCTTGGGTATCAACTTCGTATTTTTGATTCCATTGACT	p.Thr426fs	1275/2109	425/702	(CORT_0A00350|CORT_0A00350|1|1.00)	putative oligopeptide transporter	NA	NULL|Oligopeptide transporter OPT superfamily	|Biological Process: transmembrane transport (GO:0055085)	FALSE
1_74048_GCCAC_G	0.235702	0.365148	0.505181	0.204124	0.204124	0.365148	0.53033	0.204124	0.204124	0.654654	0.353553	0.144338	0.235702	0.492366	0.808694	0.144338	0.408248	0.408248	0.204124	0.540062	0.875	0.204124	Sample_151:1/1;Sample_1540:1/1;Sample_1799:1/1;Sample_1825:1/1;Sample_185:1/1;Sample_282:1/1;Sample_320:1/1;Sample_421:1/1;Sample_422:1/1;Sample_423:1/1;Sample_425:0/1;Sample_426:0/1;Sample_427:0/1;Sample_433:1/1;Sample_434:1/1;Sample_435:0/1;Sample_436:0/1;Sample_437:1/1;Sample_498:0/1;Sample_504:1/1;Sample_599:1/1;Sample_831:1/1;Sample_B-8274:1/1;Sample_B-8323:0/1	1	74048	74052	5	GCCAC	G	frameshift_variant	HIGH	CORT_0A00400	CPAR2_800290	orf19.7495	---		c.63_66delCCAC	p.Ser21fs	63/1335	21/444	character(0)	hypothetical protein	;viable;	NULL|NADH:flavin oxidoreductase/NADH oxidase, N-terminal|Aldolase-type TIM barrel	|Molecular Function: FMN binding (GO:0010181), Molecular Function: oxidoreductase activity (GO:0016491), Biological Process: oxidation-reduction process (GO:0055114)|Molecular Function: catalytic activity (GO:0003824)	TRUE
1_74052_C_CTAGT	0.235702	0.365148	0.505181	0.204124	0.204124	0.365148	0.53033	0.204124	0.204124	0.654654	0.353553	0.144338	0.235702	0.492366	0.808694	0.144338	0.408248	0.408248	0.204124	0.540062	0.875	0.204124	Sample_151:1/1;Sample_1540:1/1;Sample_1799:1/1;Sample_1825:1/1;Sample_185:1/1;Sample_282:1/1;Sample_320:1/1;Sample_421:1/1;Sample_422:1/1;Sample_423:1/1;Sample_425:0/1;Sample_426:0/1;Sample_427:0/1;Sample_433:1/1;Sample_434:1/1;Sample_435:0/1;Sample_436:0/1;Sample_437:1/1;Sample_498:0/1;Sample_504:1/1;Sample_599:1/1;Sample_831:1/1;Sample_B-8274:1/1;Sample_B-8323:0/1	1	74052	74052	1	C	CTAGT	frameshift_variant&stop_gained	HIGH	CORT_0A00400	CPAR2_800290	orf19.7495	---		c.66_67insTAGT	p.Arg23fs	67/1335	23/444	character(0)	hypothetical protein	;viable;	NULL|NADH:flavin oxidoreductase/NADH oxidase, N-terminal|Aldolase-type TIM barrel	|Molecular Function: FMN binding (GO:0010181), Molecular Function: oxidoreductase activity (GO:0016491), Biological Process: oxidation-reduction process (GO:0055114)|Molecular Function: catalytic activity (GO:0003824)	TRUE
1_74905_AAC_A	0.235702	0.365148	0.505181	0.204124	0.204124	0.365148	0.53033	0.204124	0.204124	0.654654	0.353553	0.144338	0.235702	0.492366	0.808694	0.144338	0.408248	0.408248	0.204124	0.540062	0.875	0.204124	Sample_151:1/1;Sample_1540:1/1;Sample_1799:1/1;Sample_1825:1/1;Sample_185:1/1;Sample_282:1/1;Sample_320:1/1;Sample_421:1/1;Sample_422:1/1;Sample_423:1/1;Sample_425:0/1;Sample_426:0/1;Sample_427:0/1;Sample_433:1/1;Sample_434:1/1;Sample_435:0/1;Sample_436:0/1;Sample_437:1/1;Sample_498:0/1;Sample_504:1/1;Sample_599:1/1;Sample_831:1/1;Sample_B-8274:1/1;Sample_B-8323:0/1	1	74905	74907	3	AAC	A	frameshift_variant	HIGH	CORT_0A00400	CPAR2_800290	orf19.7495	---		c.922_923delAC	p.Thr308fs	922/1335	308/444	(CORT_0A00400|CORT_0A00400|1|1.00)	hypothetical protein	;viable;	NULL|NADH:flavin oxidoreductase/NADH oxidase, N-terminal|Aldolase-type TIM barrel	|Molecular Function: FMN binding (GO:0010181), Molecular Function: oxidoreductase activity (GO:0016491), Biological Process: oxidation-reduction process (GO:0055114)|Molecular Function: catalytic activity (GO:0003824)	TRUE
1_74910_T_TTA	0.235702	0.365148	0.505181	0.204124	0.204124	0.365148	0.53033	0.204124	0.204124	0.654654	0.353553	0.144338	0.235702	0.492366	0.808694	0.144338	0.408248	0.408248	0.204124	0.540062	0.875	0.204124	Sample_151:1/1;Sample_1540:1/1;Sample_1799:1/1;Sample_1825:1/1;Sample_185:1/1;Sample_282:1/1;Sample_320:1/1;Sample_421:1/1;Sample_422:1/1;Sample_423:1/1;Sample_425:0/1;Sample_426:0/1;Sample_427:0/1;Sample_433:1/1;Sample_434:1/1;Sample_435:0/1;Sample_436:0/1;Sample_437:1/1;Sample_498:0/1;Sample_504:1/1;Sample_599:1/1;Sample_831:1/1;Sample_B-8274:1/1;Sample_B-8323:0/1	1	74910	74910	1	T	TTA	frameshift_variant	HIGH	CORT_0A00400	CPAR2_800290	orf19.7495	---		c.925_926insAT	p.Ser309fs	926/1335	309/444	(CORT_0A00400|CORT_0A00400|1|1.00)	hypothetical protein	;viable;	NULL|NADH:flavin oxidoreductase/NADH oxidase, N-terminal|Aldolase-type TIM barrel	|Molecular Function: FMN binding (GO:0010181), Molecular Function: oxidoreductase activity (GO:0016491), Biological Process: oxidation-reduction process (GO:0055114)|Molecular Function: catalytic activity (GO:0003824)	TRUE
1_80335_GAC_G	0.240772	0.373002	0.516047	0.208514	0.208514	0.373002	0.481543	0.208514	0.208514	0.668734	0.361158	0.147442	0.240772	0.502956	0.826087	0.147442	0.417029	0.417029	0.208514	0.551677	0.851257	0.208514	Sample_151:1/1;Sample_1540:1/1;Sample_1799:1/1;Sample_1825:1/1;Sample_185:1/1;Sample_282:1/1;Sample_320:1/1;Sample_421:1/1;Sample_422:1/1;Sample_423:1/1;Sample_425:0/1;Sample_426:0/1;Sample_427:0/1;Sample_433:1/1;Sample_434:1/1;Sample_435:0/1;Sample_436:0/1;Sample_437:1/1;Sample_504:1/1;Sample_599:1/1;Sample_831:1/1;Sample_B-8274:1/1;Sample_B-8323:0/1	1	80335	80337	3	GAC	G	frameshift_variant	HIGH	CORT_0A00410	CPAR2_800300	orf19.7494	---		c.4635_4636delCA	p.Ile1546fs	4635/4764	1545/1587	character(0)	hypothetical protein	NA	Methyl methanesulphonate-sensitivity protein 22		TRUE
1_80339_T_TCC	0.240772	0.373002	0.516047	0.208514	0.208514	0.373002	0.481543	0.208514	0.208514	0.668734	0.361158	0.147442	0.240772	0.502956	0.826087	0.147442	0.417029	0.417029	0.208514	0.551677	0.851257	0.208514	Sample_151:1/1;Sample_1540:1/1;Sample_1799:1/1;Sample_1825:1/1;Sample_185:1/1;Sample_282:1/1;Sample_320:1/1;Sample_421:1/1;Sample_422:1/1;Sample_423:1/1;Sample_425:0/1;Sample_426:0/1;Sample_427:0/1;Sample_433:1/1;Sample_434:1/1;Sample_435:0/1;Sample_436:0/1;Sample_437:1/1;Sample_504:1/1;Sample_599:1/1;Sample_831:1/1;Sample_B-8274:1/1;Sample_B-8323:0/1	1	80339	80339	1	T	TCC	frameshift_variant	HIGH	CORT_0A00410	CPAR2_800300	orf19.7494	---		c.4637_4638insCC	p.Glu1547fs	4638/4764	1546/1587	character(0)	hypothetical protein	NA	Methyl methanesulphonate-sensitivity protein 22		TRUE
1_81635_CG_C	0.240772	0.373002	0.516047	0.208514	0.208514	0.373002	0.481543	0.208514	0.208514	0.668734	0.361158	0.147442	0.240772	0.502956	0.826087	0.147442	0.417029	0.417029	0.208514	0.551677	0.851257	0.208514	Sample_151:1/1;Sample_1540:1/1;Sample_1799:1/1;Sample_1825:1/1;Sample_185:1/1;Sample_282:1/1;Sample_320:1/1;Sample_421:1/1;Sample_422:1/1;Sample_423:1/1;Sample_425:0/1;Sample_426:0/1;Sample_427:0/1;Sample_433:1/1;Sample_434:1/1;Sample_435:0/1;Sample_436:0/1;Sample_437:1/1;Sample_504:0/1;Sample_599:1/1;Sample_831:0/1;Sample_B-8274:1/1;Sample_B-8323:0/1	1	81635	81636	2	CG	C	frameshift_variant	HIGH	CORT_0A00420	CPAR2_800310	orf19.7492	YGR002C	SWC4,SWC4	c.495delC	p.Asp165fs	495/1650	165/549	(CORT_0A00420|CORT_0A00420|1|1.00)	putative subunit of the NuA4 histone acetyltransferase complex	;viable;	NULL|Homeodomain-like|SANT/Myb domain	|Molecular Function: DNA binding (GO:0003677)|Molecular Function: chromatin binding (GO:0003682)	TRUE
1_81639_C_CT	0.240772	0.373002	0.516047	0.208514	0.208514	0.373002	0.481543	0.208514	0.208514	0.668734	0.361158	0.147442	0.240772	0.502956	0.826087	0.147442	0.417029	0.417029	0.208514	0.551677	0.851257	0.208514	Sample_151:1/1;Sample_1540:1/1;Sample_1799:1/1;Sample_1825:1/1;Sample_185:1/1;Sample_282:1/1;Sample_320:1/1;Sample_421:1/1;Sample_422:1/1;Sample_423:1/1;Sample_425:0/1;Sample_426:0/1;Sample_427:0/1;Sample_433:1/1;Sample_434:1/1;Sample_435:0/1;Sample_436:0/1;Sample_437:1/1;Sample_504:0/1;Sample_599:1/1;Sample_831:0/1;Sample_B-8274:1/1;Sample_B-8323:0/1	1	81639	81639	1	C	CT	frameshift_variant	HIGH	CORT_0A00420	CPAR2_800310	orf19.7492	YGR002C	SWC4,SWC4	c.491dupA	p.Asp165fs	491/1650	164/549	(CORT_0A00420|CORT_0A00420|1|1.00)	putative subunit of the NuA4 histone acetyltransferase complex	;viable;	NULL|Homeodomain-like|SANT/Myb domain	|Molecular Function: DNA binding (GO:0003677)|Molecular Function: chromatin binding (GO:0003682)	TRUE
1_93963_CA_C	0.235702	0.365148	0.505181	0.204124	0.204124	0.365148	0.53033	0.204124	0.204124	0.654654	0.353553	0.144338	0.235702	0.492366	0.808694	0.144338	0.408248	0.408248	0.204124	0.540062	0.875	0.204124	Sample_151:1/1;Sample_1540:1/1;Sample_1799:1/1;Sample_1825:1/1;Sample_185:1/1;Sample_282:1/1;Sample_320:1/1;Sample_421:1/1;Sample_422:1/1;Sample_423:1/1;Sample_425:0/1;Sample_426:0/1;Sample_427:1/1;Sample_433:1/1;Sample_434:1/1;Sample_435:1/1;Sample_436:0/1;Sample_437:1/1;Sample_498:1/1;Sample_504:0/1;Sample_599:1/1;Sample_831:0/1;Sample_B-8274:1/1;Sample_B-8323:0/1	1	93963	93964	2	CA	C	frameshift_variant	HIGH	CORT_0A00460	CPAR2_800380	orf19.7499.1	---		c.67delA	p.Ile23fs	67/255	23/84	(CORT_0A00460|CORT_0A00460|1|1.00)	hypothetical protein	NA	NA	NA	FALSE
1_105855_G_GGA	0.235702	0.365148	0.505181	0.204124	0.204124	0.365148	0.53033	0.204124	0.204124	0.654654	0.353553	0.144338	0.235702	0.492366	0.808694	0.144338	0.408248	0.408248	0.204124	0.540062	0.875	0.204124	Sample_151:1/1;Sample_1540:1/1;Sample_1799:1/1;Sample_1825:1/1;Sample_185:1/1;Sample_282:1/1;Sample_320:1/1;Sample_421:1/1;Sample_422:1/1;Sample_423:1/1;Sample_425:1/1;Sample_426:1/1;Sample_427:1/1;Sample_433:1/1;Sample_434:1/1;Sample_435:1/1;Sample_436:1/1;Sample_437:1/1;Sample_498:0/1;Sample_504:1/1;Sample_599:1/1;Sample_831:1/1;Sample_B-8274:1/1;Sample_B-8323:1/1	1	105855	105855	1	G	GGA	frameshift_variant	HIGH	CORT_0A00510	CPAR2_800430	orf19.7491	YLL002W	RTT109,RTT109	c.857_858insTC	p.Ser287fs	857/1425	286/474	(CORT_0A00510|CORT_0A00510|1|1.00)	putative histone acetyltransferase	;viable;|;colony appearance: abnormal;wrinkled colonies|;filamentous growth: increased;large proportion of filamentous cells|campthotecin;resistance to chemicals: decreased;|methyl methanesulfonate;resistance to chemicals: decreased;|hydrogen peroxide;resistance to chemicals: decreased;|flucytosine;resistance to chemicals: decreased;|;virulence: decreased;|;virulence: decreased;|;induction of hos…	Histone H3-K56 acetyltransferase, RTT109		TRUE
1_105859_CCT_C	0.235702	0.365148	0.505181	0.204124	0.204124	0.365148	0.53033	0.204124	0.204124	0.654654	0.353553	0.144338	0.235702	0.492366	0.808694	0.144338	0.408248	0.408248	0.204124	0.540062	0.875	0.204124	Sample_151:1/1;Sample_1540:1/1;Sample_1799:1/1;Sample_1825:1/1;Sample_185:1/1;Sample_282:1/1;Sample_320:1/1;Sample_421:1/1;Sample_422:1/1;Sample_423:1/1;Sample_425:1/1;Sample_426:1/1;Sample_427:1/1;Sample_433:1/1;Sample_434:1/1;Sample_435:1/1;Sample_436:1/1;Sample_437:1/1;Sample_498:0/1;Sample_504:1/1;Sample_599:1/1;Sample_831:1/1;Sample_B-8274:1/1;Sample_B-8323:1/1	1	105859	105861	3	CCT	C	frameshift_variant	HIGH	CORT_0A00510	CPAR2_800430	orf19.7491	YLL002W	RTT109,RTT109	c.852_853delAG	p.Gly285fs	853/1425	284/474	(CORT_0A00510|CORT_0A00510|1|1.00)	putative histone acetyltransferase	;viable;|;colony appearance: abnormal;wrinkled colonies|;filamentous growth: increased;large proportion of filamentous cells|campthotecin;resistance to chemicals: decreased;|methyl methanesulfonate;resistance to chemicals: decreased;|hydrogen peroxide;resistance to chemicals: decreased;|flucytosine;resistance to chemicals: decreased;|;virulence: decreased;|;virulence: decreased;|;induction of hos…	Histone H3-K56 acetyltransferase, RTT109		TRUE
1_109895_GAA_G	0.235702	0.365148	0.505181	0.204124	0.204124	0.365148	0.53033	0.204124	0.204124	0.654654	0.353553	0.144338	0.235702	0.492366	0.808694	0.144338	0.408248	0.408248	0.204124	0.540062	0.875	0.204124	Sample_151:1/1;Sample_1540:1/1;Sample_1799:1/1;Sample_1825:1/1;Sample_185:1/1;Sample_282:1/1;Sample_320:1/1;Sample_421:1/1;Sample_422:1/1;Sample_423:1/1;Sample_425:1/1;Sample_426:1/1;Sample_427:1/1;Sample_433:1/1;Sample_434:1/1;Sample_435:1/1;Sample_436:1/1;Sample_437:1/1;Sample_498:0/1;Sample_504:1/1;Sample_599:1/1;Sample_831:1/1;Sample_B-8274:1/1;Sample_B-8323:1/1	1	109895	109897	3	GAA	G	frameshift_variant	HIGH	CORT_0A00530	CPAR2_800440	orf19.7539	---	INO2	c.443_444delAA	p.Glu148fs	443/1635	148/544	(CORT_0A00530|CORT_0A00530|1|1.00)	putative transcriptional activator, likely regulates genes involved in phosphatidylcholine and phosphatidylinositol biosynthesis	;inviable;homozygous null mutant strain could not be recovered, suggesting that the gene is essential under the selection conditions	NA	NA	FALSE
1_115281_G_C	0.235702	0.365148	0.505181	0.204124	0.204124	0.365148	0.53033	0.204124	0.204124	0.654654	0.353553	0.144338	0.235702	0.492366	0.808694	0.144338	0.408248	0.408248	0.204124	0.540062	0.875	0.204124	Sample_151:1/1;Sample_1540:1/1;Sample_1799:1/1;Sample_1825:1/1;Sample_185:1/1;Sample_282:1/1;Sample_320:1/1;Sample_421:1/1;Sample_422:1/1;Sample_423:1/1;Sample_425:1/1;Sample_426:1/1;Sample_427:1/1;Sample_433:1/1;Sample_434:1/1;Sample_435:1/1;Sample_436:1/1;Sample_437:1/1;Sample_498:0/1;Sample_504:1/1;Sample_599:1/1;Sample_831:1/1;Sample_B-8274:1/1;Sample_B-8323:1/1	1	115281	115281	1	G	C	stop_gained	HIGH	CORT_0A00550	CPAR2_800460	orf19.7510	YLR096W	KIN2,KIN2	c.1860C>G	p.Tyr620*	1860/4074	620/1357	character(0)	protein with similarity to S. cerevisiae Kin2p	;viable;|;competitive fitness: normal;R\I score is the median log2(R/I) value representing abundance of the mutant in recovered pool relative to inoculum|;colony appearance: normal;Morphology (M) score represents relative sizes of central and peripheral regions of colony|;vegetative growth: normal rate;|;viable;	Kinase-associated KA1|Serine/threonine-protein kinase, active site|NULL|Protein kinase-like domain|Protein kinase, catalytic domain|Protein kinase, ATP binding site|Serine/threonine- / dual-specificity protein kinase, catalytic domain	Molecular Function: protein serine/threonine kinase activity (GO:0004674), Molecular Function: ATP binding (GO:0005524), Biological Process: protein phosphorylation (GO:0006468)|Molecular Function: protein serine/threonine kinase activity (GO:0004674), Biological Process: protein phosphorylation (GO:0006468)||Molecular Function: transferase activity, transferring phosphorus-containing groups (GO:…	FALSE
1_135789_T_C	0.235702	0.365148	0.505181	0.204124	0.204124	0.365148	0.53033	0.204124	0.204124	0.654654	0.353553	0.144338	0.235702	0.492366	0.808694	0.144338	0.408248	0.408248	0.204124	0.540062	0.875	0.204124	Sample_151:1/1;Sample_1540:1/1;Sample_1799:1/1;Sample_1825:1/1;Sample_185:1/1;Sample_282:1/1;Sample_320:1/1;Sample_421:1/1;Sample_422:1/1;Sample_423:1/1;Sample_425:0/1;Sample_426:0/1;Sample_427:0/1;Sample_433:1/1;Sample_434:1/1;Sample_435:0/1;Sample_436:0/1;Sample_437:1/1;Sample_498:0/1;Sample_504:0/1;Sample_599:1/1;Sample_831:0/1;Sample_B-8274:1/1;Sample_B-8323:1/1	1	135789	135789	1	T	C	stop_lost&splice_region_variant	HIGH	CORT_0A00620	CPAR2_800540	orf19.7516	---		c.2831A>G	p.Ter944Trpext*?	2831/2832	944/943	character(0)	hypothetical protein	;viable;|;competitive fitness: normal;R\I score is the median log2(R/I) value representing abundance of the mutant in recovered pool relative to inoculum|;colony appearance: normal;Morphology (M) score represents relative sizes of central and peripheral regions of colony|;vegetative growth: normal rate;|;viable;	NULL|Glycoside hydrolase, family 3, N-terminal|Acyl-CoA N-acyltransferase|Glycoside hydrolase, superfamily	|Molecular Function: hydrolase activity, hydrolyzing O-glycosyl compounds (GO:0004553), Biological Process: carbohydrate metabolic process (GO:0005975)	FALSE
1_184806_AGG_A	0.235702	0.365148	0.505181	0.204124	0.204124	0.365148	0.53033	0.204124	0.204124	0.654654	0.353553	0.144338	0.235702	0.492366	0.808694	0.144338	0.408248	0.408248	0.204124	0.540062	0.875	0.204124	Sample_151:1/1;Sample_1540:1/1;Sample_1799:1/1;Sample_1825:1/1;Sample_185:1/1;Sample_282:1/1;Sample_320:1/1;Sample_421:1/1;Sample_422:1/1;Sample_423:1/1;Sample_425:1/1;Sample_426:1/1;Sample_427:1/1;Sample_433:1/1;Sample_434:1/1;Sample_435:1/1;Sample_436:1/1;Sample_437:1/1;Sample_498:0/1;Sample_504:1/1;Sample_599:1/1;Sample_831:1/1;Sample_B-8274:1/1;Sample_B-8323:1/1	1	184806	184808	3	AGG	A	frameshift_variant	HIGH	CORT_0A00830	CPAR2_800750	orf19.3260	YKL088W	,CAB3	c.1344_1345delGG	p.Glu449fs	1344/1692	448/563	(CORT_0A00830|CORT_0A00830|1|1.00)	hypothetical protein	NA	NULL|Flavoprotein	|Molecular Function: catalytic activity (GO:0003824)	TRUE
1_184809_AG_A	0.235702	0.365148	0.505181	0.204124	0.204124	0.365148	0.53033	0.204124	0.204124	0.654654	0.353553	0.144338	0.235702	0.492366	0.808694	0.144338	0.408248	0.408248	0.204124	0.540062	0.875	0.204124	Sample_151:1/1;Sample_1540:1/1;Sample_1799:1/1;Sample_1825:1/1;Sample_185:1/1;Sample_282:1/1;Sample_320:1/1;Sample_421:1/1;Sample_422:1/1;Sample_423:1/1;Sample_425:1/1;Sample_426:1/1;Sample_427:1/1;Sample_433:1/1;Sample_434:1/1;Sample_435:1/1;Sample_436:1/1;Sample_437:1/1;Sample_498:0/1;Sample_504:1/1;Sample_599:1/1;Sample_831:1/1;Sample_B-8274:1/1;Sample_B-8323:1/1	1	184809	184810	2	AG	A	frameshift_variant	HIGH	CORT_0A00830	CPAR2_800750	orf19.3260	YKL088W	,CAB3	c.1348delG	p.Glu450fs	1348/1692	450/563	(CORT_0A00830|CORT_0A00830|1|1.00)	hypothetical protein	NA	NULL|Flavoprotein	|Molecular Function: catalytic activity (GO:0003824)	TRUE
1_184841_G_GAA	0.235702	0.365148	0.505181	0.204124	0.204124	0.365148	0.53033	0.204124	0.204124	0.654654	0.353553	0.144338	0.235702	0.492366	0.808694	0.144338	0.408248	0.408248	0.204124	0.540062	0.875	0.204124	Sample_151:1/1;Sample_1540:1/1;Sample_1799:1/1;Sample_1825:1/1;Sample_185:1/1;Sample_282:1/1;Sample_320:1/1;Sample_421:1/1;Sample_422:1/1;Sample_423:1/1;Sample_425:1/1;Sample_426:1/1;Sample_427:1/1;Sample_433:1/1;Sample_434:1/1;Sample_435:1/1;Sample_436:1/1;Sample_437:1/1;Sample_498:0/1;Sample_504:1/1;Sample_599:1/1;Sample_831:1/1;Sample_B-8274:1/1;Sample_B-8323:1/1	1	184841	184841	1	G	GAA	frameshift_variant	HIGH	CORT_0A00830	CPAR2_800750	orf19.3260	YKL088W	,CAB3	c.1378_1379insAA	p.Gly460fs	1379/1692	460/563	(CORT_0A00830|CORT_0A00830|1|1.00)	hypothetical protein	NA	NULL|Flavoprotein	|Molecular Function: catalytic activity (GO:0003824)	TRUE
1_184844_G_GGACGACA	0.235702	0.365148	0.505181	0.204124	0.204124	0.365148	0.53033	0.204124	0.204124	0.654654	0.353553	0.144338	0.235702	0.492366	0.808694	0.144338	0.408248	0.408248	0.204124	0.540062	0.875	0.204124	Sample_151:1/1;Sample_1540:1/1;Sample_1799:1/1;Sample_1825:1/1;Sample_185:1/1;Sample_282:1/1;Sample_320:1/1;Sample_421:1/1;Sample_422:1/1;Sample_423:1/1;Sample_425:1/1;Sample_426:1/1;Sample_427:1/1;Sample_433:1/1;Sample_434:1/1;Sample_435:1/1;Sample_436:1/1;Sample_437:1/1;Sample_498:0/1;Sample_504:1/1;Sample_599:1/1;Sample_831:1/1;Sample_B-8274:1/1;Sample_B-8323:1/1	1	184844	184844	1	G	GGACGACA	frameshift_variant	HIGH	CORT_0A00830	CPAR2_800750	orf19.3260	YKL088W	,CAB3	c.1381_1382insGACGACA	p.Asp461fs	1382/1692	461/563	(CORT_0A00830|CORT_0A00830|1|1.00)	hypothetical protein	NA	NULL|Flavoprotein	|Molecular Function: catalytic activity (GO:0003824)	TRUE
1_189877_GGCTCACTATCAGA_G	0.235702	0.365148	0.505181	0.204124	0.204124	0.365148	0.53033	0.204124	0.204124	0.654654	0.353553	0.144338	0.235702	0.492366	0.808694	0.144338	0.408248	0.408248	0.204124	0.540062	0.875	0.204124	Sample_151:1/1;Sample_1540:1/1;Sample_1799:1/1;Sample_1825:1/1;Sample_185:1/1;Sample_282:1/1;Sample_320:1/1;Sample_421:1/1;Sample_422:1/1;Sample_423:1/1;Sample_425:1/1;Sample_426:1/1;Sample_427:1/1;Sample_433:1/1;Sample_434:1/1;Sample_435:1/1;Sample_436:1/1;Sample_437:1/1;Sample_498:0/1;Sample_504:1/1;Sample_599:1/1;Sample_831:1/1;Sample_B-8274:1/1;Sample_B-8323:1/1	1	189877	189890	14	GGCTCACTATCAGA	G	frameshift_variant	HIGH	CORT_0A00840	CPAR2_800770	orf19.2582	YPL009C	RQC2,	c.415_427delTCTGATAGTGAGC	p.Ser139fs	427/1965	139/654	(CORT_0A00840|CORT_0A00840|1|1.00)	hypothetical protein	;viable;	NULL|Protein of unknown function DUF3441|Domain of unknown function DUF814		FALSE
1_189892_G_GT	0.235702	0.365148	0.505181	0.204124	0.204124	0.365148	0.53033	0.204124	0.204124	0.654654	0.353553	0.144338	0.235702	0.492366	0.808694	0.144338	0.408248	0.408248	0.204124	0.540062	0.875	0.204124	Sample_151:1/1;Sample_1540:1/1;Sample_1799:1/1;Sample_1825:1/1;Sample_185:1/1;Sample_282:1/1;Sample_320:1/1;Sample_421:1/1;Sample_422:1/1;Sample_423:1/1;Sample_425:1/1;Sample_426:1/1;Sample_427:1/1;Sample_433:1/1;Sample_434:1/1;Sample_435:1/1;Sample_436:1/1;Sample_437:1/1;Sample_498:0/1;Sample_504:1/1;Sample_599:1/1;Sample_831:1/1;Sample_B-8274:1/1;Sample_B-8323:1/1	1	189892	189892	1	G	GT	frameshift_variant	HIGH	CORT_0A00840	CPAR2_800770	orf19.2582	YPL009C	RQC2,	c.412dupA	p.Thr138fs	412/1965	138/654	(CORT_0A00840|CORT_0A00840|1|1.00)	hypothetical protein	;viable;	NULL|Protein of unknown function DUF3441|Domain of unknown function DUF814		FALSE
1_191967_TCA_T	0.235702	0.365148	0.505181	0.204124	0.204124	0.365148	0.53033	0.204124	0.204124	0.654654	0.353553	0.144338	0.235702	0.492366	0.808694	0.144338	0.408248	0.408248	0.204124	0.540062	0.875	0.204124	Sample_151:1/1;Sample_1540:1/1;Sample_1799:1/1;Sample_1825:1/1;Sample_185:1/1;Sample_282:1/1;Sample_320:1/1;Sample_421:1/1;Sample_422:1/1;Sample_423:1/1;Sample_425:0/1;Sample_426:0/1;Sample_427:0/1;Sample_433:1/1;Sample_434:1/1;Sample_435:0/1;Sample_436:0/1;Sample_437:1/1;Sample_498:0/1;Sample_504:0/1;Sample_599:1/1;Sample_831:0/1;Sample_B-8274:1/1;Sample_B-8323:0/1	1	191967	191969	3	TCA	T	frameshift_variant	HIGH	CORT_0A00860	CPAR2_800790	orf19.2579	YFL003C	,MSH4	c.495_496delCA	p.Lys166fs	495/2364	165/787	(CORT_0A00860|CORT_0A00860|1|1.00)	S. cerevisiae homolog MSH4 has DNA binding, has role in reciprocal meiotic recombination and localizes to nuclear chromosome	NA	DNA mismatch repair protein MutS, connector|DNA mismatch repair protein MutS, C-terminal|DNA mismatch repair protein MutS, core|NULL|DNA mismatch repair protein MutS, clamp	Molecular Function: ATP binding (GO:0005524), Biological Process: mismatch repair (GO:0006298), Molecular Function: mismatched DNA binding (GO:0030983)|	TRUE
1_191971_A_ATG	0.235702	0.365148	0.505181	0.204124	0.204124	0.365148	0.53033	0.204124	0.204124	0.654654	0.353553	0.144338	0.235702	0.492366	0.808694	0.144338	0.408248	0.408248	0.204124	0.540062	0.875	0.204124	Sample_151:1/1;Sample_1540:1/1;Sample_1799:1/1;Sample_1825:1/1;Sample_185:1/1;Sample_282:1/1;Sample_320:1/1;Sample_421:1/1;Sample_422:1/1;Sample_423:1/1;Sample_425:0/1;Sample_426:0/1;Sample_427:0/1;Sample_433:1/1;Sample_434:1/1;Sample_435:0/1;Sample_436:0/1;Sample_437:1/1;Sample_498:0/1;Sample_504:0/1;Sample_599:1/1;Sample_831:0/1;Sample_B-8274:1/1;Sample_B-8323:0/1	1	191971	191971	1	A	ATG	frameshift_variant	HIGH	CORT_0A00860	CPAR2_800790	orf19.2579	YFL003C	,MSH4	c.498_499insTG	p.Pro167fs	499/2364	167/787	(CORT_0A00860|CORT_0A00860|1|1.00)	S. cerevisiae homolog MSH4 has DNA binding, has role in reciprocal meiotic recombination and localizes to nuclear chromosome	NA	DNA mismatch repair protein MutS, connector|DNA mismatch repair protein MutS, C-terminal|DNA mismatch repair protein MutS, core|NULL|DNA mismatch repair protein MutS, clamp	Molecular Function: ATP binding (GO:0005524), Biological Process: mismatch repair (GO:0006298), Molecular Function: mismatched DNA binding (GO:0030983)|	TRUE
1_200519_G_GAA	0.251976	0.29277	0.46291	0.218218	0.218218	0.29277	0.503953	0.218218	0	0.583212	0.377964	0.154303	0.251976	0.460566	0.728025	0.154303	0.436436	0.436436	0.218218	0.57735	0.890871	0.218218	Sample_151:1/1;Sample_1540:1/1;Sample_1799:1/1;Sample_1825:1/1;Sample_185:1/1;Sample_282:1/1;Sample_320:1/1;Sample_421:1/1;Sample_422:1/1;Sample_423:1/1;Sample_425:0/1;Sample_433:1/1;Sample_434:1/1;Sample_436:0/1;Sample_437:1/1;Sample_498:0/1;Sample_504:0/1;Sample_599:1/1;Sample_831:0/1;Sample_B-8274:1/1;Sample_B-8323:0/1	1	200519	200519	1	G	GAA	frameshift_variant	HIGH	CORT_0A00890	CPAR2_800820	orf19.2574	YFL034W	YFL034W,	c.200_201insAA	p.Asp67fs	201/2640	67/879	(CORT_0A00890|CORT_0A00890|1|1.00)	similar to C. parapsilosis CPAR2_800820 and C. albicans orf19.2574similar to S. cerevisiae YFL034W	;viable;	Protein of unknown function DUF726|NULL		TRUE
1_200521_TTC_T	0.251976	0.29277	0.46291	0.218218	0.218218	0.29277	0.503953	0.218218	0	0.583212	0.377964	0.154303	0.251976	0.460566	0.728025	0.154303	0.436436	0.436436	0.218218	0.57735	0.890871	0.218218	Sample_151:1/1;Sample_1540:1/1;Sample_1799:1/1;Sample_1825:1/1;Sample_185:1/1;Sample_282:1/1;Sample_320:1/1;Sample_421:1/1;Sample_422:1/1;Sample_423:1/1;Sample_425:0/1;Sample_433:1/1;Sample_434:1/1;Sample_436:0/1;Sample_437:1/1;Sample_498:0/1;Sample_504:0/1;Sample_599:1/1;Sample_831:0/1;Sample_B-8274:1/1;Sample_B-8323:0/1	1	200521	200523	3	TTC	T	frameshift_variant	HIGH	CORT_0A00890	CPAR2_800820	orf19.2574	YFL034W	YFL034W,	c.202_203delTC	p.Ser68fs	202/2640	68/879	(CORT_0A00890|CORT_0A00890|1|1.00)	similar to C. parapsilosis CPAR2_800820 and C. albicans orf19.2574similar to S. cerevisiae YFL034W	;viable;	Protein of unknown function DUF726|NULL		TRUE
1_208224_G_A	0.240772	0.373002	0.516047	0.208514	0.208514	0.373002	0.541736	0.208514	0.208514	0.613006	0.361158	0.147442	0.240772	0.502956	0.782609	0.147442	0.417029	0.417029	0.208514	0.551677	0.893819	0.208514	Sample_151:1/1;Sample_1540:1/1;Sample_1799:1/1;Sample_1825:1/1;Sample_185:1/1;Sample_282:1/1;Sample_320:1/1;Sample_421:1/1;Sample_422:1/1;Sample_423:1/1;Sample_425:0/1;Sample_426:0/1;Sample_433:1/1;Sample_434:1/1;Sample_435:0/1;Sample_436:0/1;Sample_437:1/1;Sample_498:0/1;Sample_504:1/1;Sample_599:1/1;Sample_831:1/1;Sample_B-8274:1/1;Sample_B-8323:0/1	1	208224	208224	1	G	A	start_lost	HIGH	CORT_0A00940	CPAR2_800870	orf19.3250	YKL012W	PRP40,	c.3G>A	p.Met1?	3/1527	1/508	(CORT_0A00940|CORT_0A00940|1|1.00)	S. cerevisiae homolog PRP40 has RNA binding, has role in nuclear mRNA splicing, via spliceosome and localizes to U1 snRNP, U2-type prespliceosome	;viable;	WW/Rsp5/WWP|FF domain|NULL	Molecular Function: protein binding (GO:0005515)|	FALSE
1_213902_C_G	0.240772	0.373002	0.516047	0.208514	0.208514	0.373002	0.541736	0.208514	0.208514	0.613006	0.361158	0.147442	0.240772	0.502956	0.782609	0.147442	0.417029	0.417029	0.208514	0.551677	0.893819	0.208514	Sample_151:1/1;Sample_1540:1/1;Sample_1799:1/1;Sample_1825:1/1;Sample_185:1/1;Sample_282:1/1;Sample_320:1/1;Sample_421:1/1;Sample_422:1/1;Sample_423:1/1;Sample_425:0/1;Sample_426:0/1;Sample_433:1/1;Sample_434:1/1;Sample_435:0/1;Sample_436:0/1;Sample_437:1/1;Sample_498:0/1;Sample_504:0/1;Sample_599:1/1;Sample_831:0/1;Sample_B-8274:1/1;Sample_B-8323:0/1	1	213902	213902	1	C	G	stop_lost&splice_region_variant	HIGH	CORT_0A00970	CPAR2_800900	orf19.3267	YDR126W	SWF1,	c.1080G>C	p.Ter360Tyrext*?	1080/1080	360/359	character(0)	S. cerevisiae homolog SWF1 has protein-cysteine S-palmitoleyltransferase activity and has role in protein palmitoylation, vacuole fusion, non-autophagic, ascospore wall assembly, exocytosis, establishment of cell polarity	;viable;|;haploinsufficient;|;invasive growth: decreased;	Zinc finger, DHHC-type, palmitoyltransferase|NULL	Molecular Function: zinc ion binding (GO:0008270)|	FALSE
1_216507_GA_G	0.240772	0.373002	0.516047	0.208514	0.208514	0.373002	0.541736	0.208514	0.208514	0.613006	0.361158	0.147442	0.240772	0.502956	0.782609	0.147442	0.417029	0.417029	0.208514	0.551677	0.893819	0.208514	Sample_151:1/1;Sample_1540:1/1;Sample_1799:1/1;Sample_1825:1/1;Sample_185:1/1;Sample_282:1/1;Sample_320:1/1;Sample_421:1/1;Sample_422:1/1;Sample_423:1/1;Sample_425:0/1;Sample_426:1/1;Sample_433:1/1;Sample_434:1/1;Sample_435:0/1;Sample_436:0/1;Sample_437:1/1;Sample_498:0/1;Sample_504:0/1;Sample_599:1/1;Sample_831:0/1;Sample_B-8274:1/1;Sample_B-8323:0/1	1	216507	216508	2	GA	G	frameshift_variant	HIGH	CORT_0A01000	CPAR2_800930	orf19.3255	---	TEN1	c.13delA	p.Ile5fs	13/453	5/150	character(0)	protein involved in telomere maintenance	;viable;|;vegetative growth: decreased rate;|;filamentous growth: increased;increased abundance of filamentous cells in liquid cultures|;telomere length: increased;extremely long and heterogeneous telomeres	Telomere length regulation/capping, TEN1		FALSE
1_216532_A_T	0.240772	0.373002	0.516047	0.208514	0.208514	0.373002	0.541736	0.208514	0.208514	0.613006	0.361158	0.147442	0.240772	0.502956	0.782609	0.147442	0.417029	0.417029	0.208514	0.551677	0.893819	0.208514	Sample_151:1/1;Sample_1540:1/1;Sample_1799:1/1;Sample_1825:1/1;Sample_185:1/1;Sample_282:1/1;Sample_320:1/1;Sample_421:1/1;Sample_422:1/1;Sample_423:1/1;Sample_425:0/1;Sample_426:1/1;Sample_433:1/1;Sample_434:1/1;Sample_435:0/1;Sample_436:0/1;Sample_437:1/1;Sample_498:0/1;Sample_504:0/1;Sample_599:1/1;Sample_831:0/1;Sample_B-8274:1/1;Sample_B-8323:0/1	1	216532	216532	1	A	T	stop_gained	HIGH	CORT_0A01000	CPAR2_800930	orf19.3255	---	TEN1	c.37A>T	p.Arg13*	37/453	13/150	character(0)	protein involved in telomere maintenance	;viable;|;vegetative growth: decreased rate;|;filamentous growth: increased;increased abundance of filamentous cells in liquid cultures|;telomere length: increased;extremely long and heterogeneous telomeres	Telomere length regulation/capping, TEN1		FALSE
1_220853_GA_G	0.235702	0.365148	0.505181	0.204124	0.204124	0.365148	0.53033	0.204124	0.204124	0.654654	0.353553	0.144338	0.235702	0.492366	0.808694	0.144338	0.408248	0.408248	0.204124	0.540062	0.875	0.204124	Sample_151:1/1;Sample_1540:1/1;Sample_1799:1/1;Sample_1825:1/1;Sample_185:1/1;Sample_282:1/1;Sample_320:1/1;Sample_421:1/1;Sample_422:1/1;Sample_423:1/1;Sample_425:0/1;Sample_426:1/1;Sample_427:0/1;Sample_433:1/1;Sample_434:1/1;Sample_435:0/1;Sample_436:1/1;Sample_437:1/1;Sample_498:0/1;Sample_504:0/1;Sample_599:1/1;Sample_831:0/1;Sample_B-8274:1/1;Sample_B-8323:0/1	1	220853	220854	2	GA	G	frameshift_variant	HIGH	CORT_0A01015	CPAR2_800950	orf19.3264.1	---		c.136delT	p.Ser46fs	136/228	46/75	(CORT_0A01015|CORT_0A01015|1|1.00)	hypothetical protein	NA	NULL		TRUE
1_220856_GTA_G	0.235702	0.365148	0.505181	0.204124	0.204124	0.365148	0.53033	0.204124	0.204124	0.654654	0.353553	0.144338	0.235702	0.492366	0.808694	0.144338	0.408248	0.408248	0.204124	0.540062	0.875	0.204124	Sample_151:1/1;Sample_1540:1/1;Sample_1799:1/1;Sample_1825:1/1;Sample_185:1/1;Sample_282:1/1;Sample_320:1/1;Sample_421:1/1;Sample_422:1/1;Sample_423:1/1;Sample_425:0/1;Sample_426:1/1;Sample_427:0/1;Sample_433:1/1;Sample_434:1/1;Sample_435:0/1;Sample_436:1/1;Sample_437:1/1;Sample_498:0/1;Sample_504:0/1;Sample_599:1/1;Sample_831:0/1;Sample_B-8274:1/1;Sample_B-8323:0/1	1	220856	220858	3	GTA	G	frameshift_variant	HIGH	CORT_0A01015	CPAR2_800950	orf19.3264.1	---		c.132_133delTA	p.Thr45fs	133/228	44/75	(CORT_0A01015|CORT_0A01015|1|1.00)	hypothetical protein	NA	NULL		TRUE
1_223401_CA_C	0.235702	0.365148	0.505181	0.204124	0.204124	0.365148	0.53033	0.204124	0.204124	0.654654	0.353553	0.144338	0.235702	0.492366	0.808694	0.144338	0.408248	0.408248	0.204124	0.540062	0.875	0.204124	Sample_151:1/1;Sample_1540:1/1;Sample_1799:1/1;Sample_1825:1/1;Sample_185:1/1;Sample_282:1/1;Sample_320:1/1;Sample_421:1/1;Sample_422:1/1;Sample_423:1/1;Sample_425:0/1;Sample_426:1/1;Sample_427:1/1;Sample_433:1/1;Sample_434:1/1;Sample_435:0/1;Sample_436:0/1;Sample_437:1/1;Sample_498:0/1;Sample_504:0/1;Sample_599:1/1;Sample_831:0/1;Sample_B-8274:1/1;Sample_B-8323:0/1	1	223401	223402	2	CA	C	frameshift_variant	HIGH	CORT_0A01020	CPAR2_800960	orf19.3264	YKL011C	CCE1,CCE1	c.241delA	p.Thr81fs	241/969	81/322	(CORT_0A01020|CORT_0A01020|1|1.00)	putative Holliday junction resolving enzyme	;invasive growth: decreased;	Ribonuclease H-like domain|NULL|Mitochondrial resolvase Ydc2, catalytic	Molecular Function: nucleic acid binding (GO:0003676)|	TRUE
1_223404_CAA_C	0.235702	0.365148	0.505181	0.204124	0.204124	0.365148	0.53033	0.204124	0.204124	0.654654	0.353553	0.144338	0.235702	0.492366	0.808694	0.144338	0.408248	0.408248	0.204124	0.540062	0.875	0.204124	Sample_151:1/1;Sample_1540:1/1;Sample_1799:1/1;Sample_1825:1/1;Sample_185:1/1;Sample_282:1/1;Sample_320:1/1;Sample_421:1/1;Sample_422:1/1;Sample_423:1/1;Sample_425:0/1;Sample_426:1/1;Sample_427:1/1;Sample_433:1/1;Sample_434:1/1;Sample_435:0/1;Sample_436:0/1;Sample_437:1/1;Sample_498:0/1;Sample_504:0/1;Sample_599:1/1;Sample_831:0/1;Sample_B-8274:1/1;Sample_B-8323:0/1	1	223404	223406	3	CAA	C	frameshift_variant	HIGH	CORT_0A01020	CPAR2_800960	orf19.3264	YKL011C	CCE1,CCE1	c.243_244delAA	p.Ile82fs	243/969	81/322	(CORT_0A01020|CORT_0A01020|1|1.00)	putative Holliday junction resolving enzyme	;invasive growth: decreased;	Ribonuclease H-like domain|NULL|Mitochondrial resolvase Ydc2, catalytic	Molecular Function: nucleic acid binding (GO:0003676)|	TRUE
1_237839_G_GTT	0.240772	0.373002	0.516047	0.208514	0.208514	0.279751	0.481543	0.208514	0	0.613006	0.361158	0.147442	0.240772	0.440086	0.782609	0.147442	0.417029	0.417029	0.208514	0.551677	0.893819	0.208514	Sample_151:1/1;Sample_1540:1/1;Sample_1799:1/1;Sample_1825:1/1;Sample_185:1/1;Sample_282:1/1;Sample_320:1/1;Sample_421:1/1;Sample_422:1/1;Sample_423:1/1;Sample_425:0/1;Sample_426:0/1;Sample_427:0/1;Sample_433:1/1;Sample_434:1/1;Sample_436:0/1;Sample_437:1/1;Sample_498:0/1;Sample_504:0/1;Sample_599:1/1;Sample_831:0/1;Sample_B-8274:1/1;Sample_B-8323:0/1	1	237839	237839	1	G	GTT	frameshift_variant	HIGH	CORT_0A01100	CPAR2_801050	orf19.2859	YKR092C	SRP40,SRP40	c.524_525insTT	p.Ser177fs	525/1011	175/336	(CORT_0A01100|CORT_0A01100|1|1.00)	putative chaperone of small nucleolar ribonucleoprotein particles	;viable;	NULL|SRP40, C-terminal		TRUE
1_237843_C_CATCTTTAGAT	0.240772	0.373002	0.516047	0.208514	0.208514	0.279751	0.481543	0.208514	0	0.613006	0.361158	0.147442	0.240772	0.440086	0.782609	0.147442	0.417029	0.417029	0.208514	0.551677	0.893819	0.208514	Sample_151:1/1;Sample_1540:1/1;Sample_1799:1/1;Sample_1825:1/1;Sample_185:1/1;Sample_282:1/1;Sample_320:1/1;Sample_421:1/1;Sample_422:1/1;Sample_423:1/1;Sample_425:0/1;Sample_426:0/1;Sample_427:0/1;Sample_433:1/1;Sample_434:1/1;Sample_436:0/1;Sample_437:1/1;Sample_498:0/1;Sample_504:0/1;Sample_599:1/1;Sample_831:0/1;Sample_B-8274:1/1;Sample_B-8323:0/1	1	237843	237843	1	C	CATCTTTAGAT	frameshift_variant	HIGH	CORT_0A01100	CPAR2_801050	orf19.2859	YKR092C	SRP40,SRP40	c.528_529insATCTTTAGAT	p.Ser177fs	529/1011	177/336	(CORT_0A01100|CORT_0A01100|1|1.00)	putative chaperone of small nucleolar ribonucleoprotein particles	;viable;	NULL|SRP40, C-terminal		TRUE
1_238073_CTG_C	0.240772	0.373002	0.516047	0.208514	0.208514	0.279751	0.481543	0.208514	0	0.613006	0.361158	0.147442	0.240772	0.440086	0.782609	0.147442	0.417029	0.417029	0.208514	0.551677	0.893819	0.208514	Sample_151:1/1;Sample_1540:1/1;Sample_1799:1/1;Sample_1825:1/1;Sample_185:1/1;Sample_282:1/1;Sample_320:1/1;Sample_421:1/1;Sample_422:1/1;Sample_423:1/1;Sample_425:0/1;Sample_426:0/1;Sample_427:0/1;Sample_433:1/1;Sample_434:1/1;Sample_436:0/1;Sample_437:1/1;Sample_498:0/1;Sample_504:0/1;Sample_599:1/1;Sample_831:0/1;Sample_B-8274:1/1;Sample_B-8323:0/1	1	238073	238075	3	CTG	C	frameshift_variant	HIGH	CORT_0A01100	CPAR2_801050	orf19.2859	YKR092C	SRP40,SRP40	c.759_760delTG	p.Glu254fs	759/1011	253/336	(CORT_0A01100|CORT_0A01100|1|1.00)	putative chaperone of small nucleolar ribonucleoprotein particles	;viable;	NULL|SRP40, C-terminal		TRUE
1_238076_AATCT_A	0.240772	0.373002	0.516047	0.208514	0.208514	0.279751	0.481543	0.208514	0	0.613006	0.361158	0.147442	0.240772	0.440086	0.782609	0.147442	0.417029	0.417029	0.208514	0.551677	0.893819	0.208514	Sample_151:1/1;Sample_1540:1/1;Sample_1799:1/1;Sample_1825:1/1;Sample_185:1/1;Sample_282:1/1;Sample_320:1/1;Sample_421:1/1;Sample_422:1/1;Sample_423:1/1;Sample_425:0/1;Sample_426:0/1;Sample_427:0/1;Sample_433:1/1;Sample_434:1/1;Sample_436:0/1;Sample_437:1/1;Sample_498:0/1;Sample_504:0/1;Sample_599:1/1;Sample_831:0/1;Sample_B-8274:1/1;Sample_B-8323:0/1	1	238076	238080	5	AATCT	A	frameshift_variant	HIGH	CORT_0A01100	CPAR2_801050	orf19.2859	YKR092C	SRP40,SRP40	c.762_765delATCT	p.Ser255fs	762/1011	254/336	(CORT_0A01100|CORT_0A01100|1|1.00)	putative chaperone of small nucleolar ribonucleoprotein particles	;viable;	NULL|SRP40, C-terminal		TRUE
1_244310_G_GCT	0.129099	0.1	0.395285	0	0	0.3	0.516398	0.223607	0	0.657376	0.387298	0	0	0.26968	0.699379	0.158114	0.447214	0.447214	0.223607	0.507093	0.867227	0.223607	Sample_151:1/1;Sample_1540:1/1;Sample_1825:1/1;Sample_185:1/1;Sample_282:1/1;Sample_320:1/1;Sample_421:1/1;Sample_422:1/1;Sample_425:0/1;Sample_426:0/1;Sample_427:0/1;Sample_433:1/1;Sample_436:0/1;Sample_437:1/1;Sample_498:1/1;Sample_504:0/1;Sample_599:1/1;Sample_831:0/1;Sample_B-8274:1/1;Sample_B-8323:0/1	1	244310	244310	1	G	GCT	frameshift_variant	HIGH	CORT_0A01130	CPAR2_801080	orf19.2600	YNL126W	SPC98,SPC98	c.334_335insAG	p.Thr112fs	334/2349	112/782	(CORT_0A01130|CORT_0A01130|1|1.00)	putative component of the microtubule-nucleating Tub4p (gamma-tubulin) complex	;viable;	Spc97/Spc98|Spindle pole body component 98p	Biological Process: microtubule cytoskeleton organization (GO:0000226), Cellular Component: spindle pole (GO:0000922), Cellular Component: microtubule organizing center (GO:0005815)|	TRUE
1_244312_GTC_G	0.129099	0.1	0.395285	0	0	0.3	0.516398	0.223607	0	0.657376	0.387298	0	0	0.26968	0.699379	0.158114	0.447214	0.447214	0.223607	0.507093	0.867227	0.223607	Sample_151:1/1;Sample_1540:1/1;Sample_1825:1/1;Sample_185:1/1;Sample_282:1/1;Sample_320:1/1;Sample_421:1/1;Sample_422:1/1;Sample_425:0/1;Sample_426:0/1;Sample_427:0/1;Sample_433:1/1;Sample_436:0/1;Sample_437:1/1;Sample_498:1/1;Sample_504:0/1;Sample_599:1/1;Sample_831:0/1;Sample_B-8274:1/1;Sample_B-8323:0/1	1	244312	244314	3	GTC	G	frameshift_variant	HIGH	CORT_0A01130	CPAR2_801080	orf19.2600	YNL126W	SPC98,SPC98	c.331_332delGA	p.Asp111fs	332/2349	111/782	(CORT_0A01130|CORT_0A01130|1|1.00)	putative component of the microtubule-nucleating Tub4p (gamma-tubulin) complex	;viable;	Spc97/Spc98|Spindle pole body component 98p	Biological Process: microtubule cytoskeleton organization (GO:0000226), Cellular Component: spindle pole (GO:0000922), Cellular Component: microtubule organizing center (GO:0005815)|	TRUE
1_252957_AGC_A	0.240772	0.373002	0.516047	0.208514	0.208514	0.279751	0.481543	0.208514	0	0.613006	0.361158	0.147442	0.240772	0.440086	0.782609	0.147442	0.417029	0.417029	0.208514	0.551677	0.893819	0.208514	Sample_151:1/1;Sample_1540:1/1;Sample_1799:1/1;Sample_1825:1/1;Sample_185:1/1;Sample_282:1/1;Sample_320:1/1;Sample_421:1/1;Sample_422:1/1;Sample_423:1/1;Sample_425:0/1;Sample_426:0/1;Sample_427:0/1;Sample_433:1/1;Sample_434:1/1;Sample_436:0/1;Sample_437:1/1;Sample_498:1/1;Sample_504:0/1;Sample_599:1/1;Sample_831:0/1;Sample_B-8274:1/1;Sample_B-8323:0/1	1	252957	252959	3	AGC	A	frameshift_variant	HIGH	CORT_0A01160	CPAR2_801100	orf19.2823	YPR065W	ROX1,RFG1	c.675_676delGC	p.Gln226fs	675/1437	225/478	(CORT_0A01160|CORT_0A01160|1|1.00)	putative ranscriptional regulator	;viable;heterozygous deletion|;viable;|;viable;|;viable;|;viable;|;interaction with host/environment: normal;wild-type response to farnesol|;filamentous growth: increased;heterozygous deletion|;filamentous growth: increased;transposon insertion proximal to, but not within, the ORF|;filamentous growth: abnormal;constitutive filamentous growth|;filamentous growth: increased;growth is exclusively fi…	High mobility group, superfamily|NULL	Molecular Function: protein binding (GO:0005515)|	TRUE
1_252960_AG_A	0.240772	0.373002	0.516047	0.208514	0.208514	0.279751	0.481543	0.208514	0	0.613006	0.361158	0.147442	0.240772	0.440086	0.782609	0.147442	0.417029	0.417029	0.208514	0.551677	0.893819	0.208514	Sample_151:1/1;Sample_1540:1/1;Sample_1799:1/1;Sample_1825:1/1;Sample_185:1/1;Sample_282:1/1;Sample_320:1/1;Sample_421:1/1;Sample_422:1/1;Sample_423:1/1;Sample_425:0/1;Sample_426:0/1;Sample_427:0/1;Sample_433:1/1;Sample_434:1/1;Sample_436:0/1;Sample_437:1/1;Sample_498:1/1;Sample_504:0/1;Sample_599:1/1;Sample_831:0/1;Sample_B-8274:1/1;Sample_B-8323:0/1	1	252960	252961	2	AG	A	frameshift_variant	HIGH	CORT_0A01160	CPAR2_801100	orf19.2823	YPR065W	ROX1,RFG1	c.678delG	p.Gln226fs	678/1437	226/478	(CORT_0A01160|CORT_0A01160|1|1.00)	putative ranscriptional regulator	;viable;heterozygous deletion|;viable;|;viable;|;viable;|;viable;|;interaction with host/environment: normal;wild-type response to farnesol|;filamentous growth: increased;heterozygous deletion|;filamentous growth: increased;transposon insertion proximal to, but not within, the ORF|;filamentous growth: abnormal;constitutive filamentous growth|;filamentous growth: increased;growth is exclusively fi…	High mobility group, superfamily|NULL	Molecular Function: protein binding (GO:0005515)|	TRUE
1_252996_AGC_A	0.240772	0.373002	0.516047	0.208514	0.208514	0.279751	0.481543	0.208514	0	0.613006	0.361158	0.147442	0.240772	0.440086	0.782609	0.147442	0.417029	0.417029	0.208514	0.551677	0.893819	0.208514	Sample_151:1/1;Sample_1540:1/1;Sample_1799:1/1;Sample_1825:1/1;Sample_185:1/1;Sample_282:1/1;Sample_320:1/1;Sample_421:1/1;Sample_422:1/1;Sample_423:1/1;Sample_425:0/1;Sample_426:0/1;Sample_427:0/1;Sample_433:1/1;Sample_434:1/1;Sample_436:0/1;Sample_437:1/1;Sample_498:1/1;Sample_504:0/1;Sample_599:1/1;Sample_831:0/1;Sample_B-8274:1/1;Sample_B-8323:0/1	1	252996	252998	3	AGC	A	frameshift_variant	HIGH	CORT_0A01160	CPAR2_801100	orf19.2823	YPR065W	ROX1,RFG1	c.714_715delGC	p.Gln239fs	714/1437	238/478	(CORT_0A01160|CORT_0A01160|1|1.00)	putative ranscriptional regulator	;viable;heterozygous deletion|;viable;|;viable;|;viable;|;viable;|;interaction with host/environment: normal;wild-type response to farnesol|;filamentous growth: increased;heterozygous deletion|;filamentous growth: increased;transposon insertion proximal to, but not within, the ORF|;filamentous growth: abnormal;constitutive filamentous growth|;filamentous growth: increased;growth is exclusively fi…	High mobility group, superfamily|NULL	Molecular Function: protein binding (GO:0005515)|	TRUE
1_252999_AG_A	0.240772	0.373002	0.516047	0.208514	0.208514	0.279751	0.481543	0.208514	0	0.613006	0.361158	0.147442	0.240772	0.440086	0.782609	0.147442	0.417029	0.417029	0.208514	0.551677	0.893819	0.208514	Sample_151:1/1;Sample_1540:1/1;Sample_1799:1/1;Sample_1825:1/1;Sample_185:1/1;Sample_282:1/1;Sample_320:1/1;Sample_421:1/1;Sample_422:1/1;Sample_423:1/1;Sample_425:0/1;Sample_426:0/1;Sample_427:0/1;Sample_433:1/1;Sample_434:1/1;Sample_436:0/1;Sample_437:1/1;Sample_498:1/1;Sample_504:0/1;Sample_599:1/1;Sample_831:0/1;Sample_B-8274:1/1;Sample_B-8323:0/1	1	252999	253000	2	AG	A	frameshift_variant	HIGH	CORT_0A01160	CPAR2_801100	orf19.2823	YPR065W	ROX1,RFG1	c.717delG	p.Gln239fs	717/1437	239/478	(CORT_0A01160|CORT_0A01160|1|1.00)	putative ranscriptional regulator	;viable;heterozygous deletion|;viable;|;viable;|;viable;|;viable;|;interaction with host/environment: normal;wild-type response to farnesol|;filamentous growth: increased;heterozygous deletion|;filamentous growth: increased;transposon insertion proximal to, but not within, the ORF|;filamentous growth: abnormal;constitutive filamentous growth|;filamentous growth: increased;growth is exclusively fi…	High mobility group, superfamily|NULL	Molecular Function: protein binding (GO:0005515)|	TRUE
1_253506_C_CTA	0.240772	0.373002	0.516047	0.208514	0.208514	0.279751	0.481543	0.208514	0	0.613006	0.361158	0.147442	0.240772	0.440086	0.782609	0.147442	0.417029	0.417029	0.208514	0.551677	0.893819	0.208514	Sample_151:1/1;Sample_1540:1/1;Sample_1799:1/1;Sample_1825:1/1;Sample_185:1/1;Sample_282:1/1;Sample_320:1/1;Sample_421:1/1;Sample_422:1/1;Sample_423:1/1;Sample_425:0/1;Sample_426:0/1;Sample_427:0/1;Sample_433:1/1;Sample_434:1/1;Sample_436:0/1;Sample_437:1/1;Sample_498:1/1;Sample_504:0/1;Sample_599:1/1;Sample_831:0/1;Sample_B-8274:1/1;Sample_B-8323:0/1	1	253506	253506	1	C	CTA	frameshift_variant	HIGH	CORT_0A01160	CPAR2_801100	orf19.2823	YPR065W	ROX1,RFG1	c.1223_1224insTA	p.Ala409fs	1224/1437	408/478	(CORT_0A01160|CORT_0A01160|1|1.00)	putative ranscriptional regulator	;viable;heterozygous deletion|;viable;|;viable;|;viable;|;viable;|;interaction with host/environment: normal;wild-type response to farnesol|;filamentous growth: increased;heterozygous deletion|;filamentous growth: increased;transposon insertion proximal to, but not within, the ORF|;filamentous growth: abnormal;constitutive filamentous growth|;filamentous growth: increased;growth is exclusively fi…	High mobility group, superfamily|NULL	Molecular Function: protein binding (GO:0005515)|	TRUE
1_253510_GGGTGGTGC_G	0.240772	0.373002	0.516047	0.208514	0.208514	0.279751	0.481543	0.208514	0	0.613006	0.361158	0.147442	0.240772	0.440086	0.782609	0.147442	0.417029	0.417029	0.208514	0.551677	0.893819	0.208514	Sample_151:1/1;Sample_1540:1/1;Sample_1799:1/1;Sample_1825:1/1;Sample_185:1/1;Sample_282:1/1;Sample_320:1/1;Sample_421:1/1;Sample_422:1/1;Sample_423:1/1;Sample_425:0/1;Sample_426:0/1;Sample_427:0/1;Sample_433:1/1;Sample_434:1/1;Sample_436:0/1;Sample_437:1/1;Sample_498:1/1;Sample_504:0/1;Sample_599:1/1;Sample_831:0/1;Sample_B-8274:1/1;Sample_B-8323:0/1	1	253510	253518	9	GGGTGGTGC	G	frameshift_variant	HIGH	CORT_0A01160	CPAR2_801100	orf19.2823	YPR065W	ROX1,RFG1	c.1228_1235delGGTGGTGC	p.Gly410fs	1228/1437	410/478	(CORT_0A01160|CORT_0A01160|1|1.00)	putative ranscriptional regulator	;viable;heterozygous deletion|;viable;|;viable;|;viable;|;viable;|;interaction with host/environment: normal;wild-type response to farnesol|;filamentous growth: increased;heterozygous deletion|;filamentous growth: increased;transposon insertion proximal to, but not within, the ORF|;filamentous growth: abnormal;constitutive filamentous growth|;filamentous growth: increased;growth is exclusively fi…	High mobility group, superfamily|NULL	Molecular Function: protein binding (GO:0005515)|	TRUE
1_283029_T_TTG	0.125988	0.09759	0.308607	0	0	0.29277	0.566947	0.218218	0	0.641533	0.377964	0	0	0.328976	0.728025	0.154303	0.327327	0.327327	0.218218	0.412393	0.890871	0.218218	Sample_151:1/1;Sample_1540:1/1;Sample_1825:1/1;Sample_185:1/1;Sample_282:1/1;Sample_320:1/1;Sample_421:1/1;Sample_422:1/1;Sample_424:0/1;Sample_425:0/1;Sample_426:0/1;Sample_427:0/1;Sample_433:1/1;Sample_437:1/1;Sample_498:0/1;Sample_504:0/1;Sample_599:1/1;Sample_748:1/1;Sample_831:0/1;Sample_B-8274:1/1;Sample_B-8323:0/1	1	283029	283029	1	T	TTG	frameshift_variant	HIGH	CORT_0A01310	CPAR2_801250	orf19.3733	YLR174W	,IDP2	c.1219_1220insCA	p.Lys407fs	1219/1245	407/414	character(0)	isocitrate dehydrogenase	NA	Isocitrate dehydrogenase NADP-dependent|NULL|Isocitrate/isopropylmalate dehydrogenase, conserved site|Isopropylmalate dehydrogenase-like domain	Molecular Function: isocitrate dehydrogenase (NADP+) activity (GO:0004450), Biological Process: isocitrate metabolic process (GO:0006102), Biological Process: oxidation-reduction process (GO:0055114)||Molecular Function: magnesium ion binding (GO:0000287), Molecular Function: oxidoreductase activity, acting on the CH-OH group of donors, NAD or NADP as acceptor (GO:0016616), Molecular Function: NA…	TRUE
1_283032_CTT_C	0.125988	0.09759	0.308607	0	0	0.29277	0.566947	0.218218	0	0.641533	0.377964	0	0	0.328976	0.728025	0.154303	0.327327	0.327327	0.218218	0.412393	0.890871	0.218218	Sample_151:1/1;Sample_1540:1/1;Sample_1825:1/1;Sample_185:1/1;Sample_282:1/1;Sample_320:1/1;Sample_421:1/1;Sample_422:1/1;Sample_424:0/1;Sample_425:0/1;Sample_426:0/1;Sample_427:0/1;Sample_433:1/1;Sample_437:1/1;Sample_498:0/1;Sample_504:0/1;Sample_599:1/1;Sample_748:1/1;Sample_831:0/1;Sample_B-8274:1/1;Sample_B-8323:0/1	1	283032	283034	3	CTT	C	frameshift_variant	HIGH	CORT_0A01310	CPAR2_801250	orf19.3733	YLR174W	,IDP2	c.1215_1216delAA	p.Arg406fs	1216/1245	405/414	character(0)	isocitrate dehydrogenase	NA	Isocitrate dehydrogenase NADP-dependent|NULL|Isocitrate/isopropylmalate dehydrogenase, conserved site|Isopropylmalate dehydrogenase-like domain	Molecular Function: isocitrate dehydrogenase (NADP+) activity (GO:0004450), Biological Process: isocitrate metabolic process (GO:0006102), Biological Process: oxidation-reduction process (GO:0055114)||Molecular Function: magnesium ion binding (GO:0000287), Molecular Function: oxidoreductase activity, acting on the CH-OH group of donors, NAD or NADP as acceptor (GO:0016616), Molecular Function: NA…	TRUE
1_286733_A_AGT	0.123091	0.0953463	0.376889	0	0	0.381385	0.615457	0.213201	0	0.683763	0.369274	0	0	0.321412	0.755742	0.150756	0.426401	0.426401	0.213201	0.483494	0.913908	0.213201	Sample_151:1/1;Sample_1540:1/1;Sample_1825:1/1;Sample_185:1/1;Sample_282:1/1;Sample_320:1/1;Sample_421:1/1;Sample_422:1/1;Sample_424:0/1;Sample_425:0/1;Sample_426:1/1;Sample_427:0/1;Sample_433:1/1;Sample_436:0/1;Sample_437:1/1;Sample_498:0/1;Sample_504:0/1;Sample_599:1/1;Sample_748:1/1;Sample_831:0/1;Sample_B-8274:1/1;Sample_B-8323:1/1	1	286733	286733	1	A	AGT	frameshift_variant	HIGH	CORT_0A01320	CPAR2_801260	orf19.3734	---	GEF2	c.290_291insGT	p.Ser98fs	291/3018	97/1005	(CORT_0A01320|CORT_0A01320|1|1.00)	member of the voltage chloride channel family	;viable;	Chloride channel, core|NULL|Chloride channel, voltage gated	Molecular Function: ion channel activity (GO:0005216), Biological Process: transmembrane transport (GO:0055085)||Molecular Function: voltage-gated chloride channel activity (GO:0005247), Biological Process: chloride transport (GO:0006821), Cellular Component: membrane (GO:0016020), Biological Process: transmembrane transport (GO:0055085)	TRUE
1_286736_CTT_C	0.123091	0.0953463	0.376889	0	0	0.381385	0.615457	0.213201	0	0.683763	0.369274	0	0	0.321412	0.755742	0.150756	0.426401	0.426401	0.213201	0.483494	0.913908	0.213201	Sample_151:1/1;Sample_1540:1/1;Sample_1825:1/1;Sample_185:1/1;Sample_282:1/1;Sample_320:1/1;Sample_421:1/1;Sample_422:1/1;Sample_424:0/1;Sample_425:0/1;Sample_426:1/1;Sample_427:0/1;Sample_433:1/1;Sample_436:0/1;Sample_437:1/1;Sample_498:0/1;Sample_504:0/1;Sample_599:1/1;Sample_748:1/1;Sample_831:0/1;Sample_B-8274:1/1;Sample_B-8323:1/1	1	286736	286738	3	CTT	C	frameshift_variant	HIGH	CORT_0A01320	CPAR2_801260	orf19.3734	---	GEF2	c.296_297delTT	p.Phe99fs	296/3018	99/1005	(CORT_0A01320|CORT_0A01320|1|1.00)	member of the voltage chloride channel family	;viable;	Chloride channel, core|NULL|Chloride channel, voltage gated	Molecular Function: ion channel activity (GO:0005216), Biological Process: transmembrane transport (GO:0055085)||Molecular Function: voltage-gated chloride channel activity (GO:0005247), Biological Process: chloride transport (GO:0006821), Cellular Component: membrane (GO:0016020), Biological Process: transmembrane transport (GO:0055085)	TRUE
1_289456_G_T	0.123091	0.0953463	0.376889	0	0	0.381385	0.615457	0.213201	0	0.683763	0.369274	0	0	0.321412	0.755742	0.150756	0.426401	0.426401	0.213201	0.483494	0.913908	0.213201	Sample_151:1/1;Sample_1540:1/1;Sample_1825:1/1;Sample_185:1/1;Sample_282:1/1;Sample_320:1/1;Sample_421:1/1;Sample_422:1/1;Sample_424:0/1;Sample_425:0/1;Sample_426:1/1;Sample_427:0/1;Sample_433:1/1;Sample_436:0/1;Sample_437:1/1;Sample_498:0/1;Sample_504:0/1;Sample_599:1/1;Sample_748:1/1;Sample_831:0/1;Sample_B-8274:1/1;Sample_B-8323:0/1	1	289456	289456	1	G	T	stop_gained	HIGH	CORT_0A01320	CPAR2_801260	orf19.3734	---	GEF2	c.3013G>T	p.Glu1005*	3013/3018	1005/1005	character(0)	member of the voltage chloride channel family	;viable;	Chloride channel, core|NULL|Chloride channel, voltage gated	Molecular Function: ion channel activity (GO:0005216), Biological Process: transmembrane transport (GO:0055085)||Molecular Function: voltage-gated chloride channel activity (GO:0005247), Biological Process: chloride transport (GO:0006821), Cellular Component: membrane (GO:0016020), Biological Process: transmembrane transport (GO:0055085)	FALSE
1_290001_A_ATT	0.125988	0.09759	0.385758	0	0	0.39036	0.566947	0.218218	0	0.699854	0.377964	0	0	0.328976	0.773527	0.154303	0.436436	0.436436	0.218218	0.494872	0.890871	0.218218	Sample_151:1/1;Sample_1540:1/1;Sample_1825:1/1;Sample_185:1/1;Sample_282:1/1;Sample_320:1/1;Sample_421:1/1;Sample_422:1/1;Sample_424:0/1;Sample_425:0/1;Sample_426:0/1;Sample_427:0/1;Sample_433:1/1;Sample_436:0/1;Sample_437:1/1;Sample_504:0/1;Sample_599:1/1;Sample_748:1/1;Sample_831:0/1;Sample_B-8274:1/1;Sample_B-8323:0/1	1	290001	290001	1	A	ATT	frameshift_variant	HIGH	CORT_0A01330	CPAR2_801270	orf19.3735	---		c.1222_1223insAA	p.Leu408fs	1222/1671	408/556	(CORT_0A01330|CORT_0A01330|1|1.00)	hypothetical protein	NA	NA	NA	TRUE
1_290003_CGT_C	0.125988	0.09759	0.385758	0	0	0.39036	0.566947	0.218218	0	0.699854	0.377964	0	0	0.328976	0.773527	0.154303	0.436436	0.436436	0.218218	0.494872	0.890871	0.218218	Sample_151:1/1;Sample_1540:1/1;Sample_1825:1/1;Sample_185:1/1;Sample_282:1/1;Sample_320:1/1;Sample_421:1/1;Sample_422:1/1;Sample_424:0/1;Sample_425:0/1;Sample_426:0/1;Sample_427:0/1;Sample_433:1/1;Sample_436:0/1;Sample_437:1/1;Sample_504:0/1;Sample_599:1/1;Sample_748:1/1;Sample_831:0/1;Sample_B-8274:1/1;Sample_B-8323:0/1	1	290003	290005	3	CGT	C	frameshift_variant	HIGH	CORT_0A01330	CPAR2_801270	orf19.3735	---		c.1219_1220delAC	p.Thr407fs	1220/1671	407/556	(CORT_0A01330|CORT_0A01330|1|1.00)	hypothetical protein	NA	NA	NA	TRUE
1_290147_G_T	0.125988	0.09759	0.385758	0	0	0.39036	0.566947	0.218218	0	0.699854	0.377964	0	0	0.328976	0.773527	0.154303	0.436436	0.436436	0.218218	0.494872	0.890871	0.218218	Sample_151:1/1;Sample_1540:1/1;Sample_1825:1/1;Sample_185:1/1;Sample_282:1/1;Sample_320:1/1;Sample_421:1/1;Sample_422:1/1;Sample_424:0/1;Sample_425:0/1;Sample_426:0/1;Sample_427:0/1;Sample_433:1/1;Sample_436:0/1;Sample_437:1/1;Sample_504:0/1;Sample_599:1/1;Sample_748:1/1;Sample_831:0/1;Sample_B-8274:1/1;Sample_B-8323:0/1	1	290147	290147	1	G	T	stop_gained	HIGH	CORT_0A01330	CPAR2_801270	orf19.3735	---		c.1077C>A	p.Tyr359*	1077/1671	359/556	character(0)	hypothetical protein	NA	NA	NA	FALSE
1_300679_GTAAA_G	0.125988	0.09759	0.385758	0	0	0.39036	0.566947	0.218218	0	0.699854	0.377964	0	0	0.328976	0.773527	0.154303	0.436436	0.436436	0.218218	0.494872	0.890871	0.218218	Sample_151:1/1;Sample_1540:1/1;Sample_1825:1/1;Sample_185:1/1;Sample_282:1/1;Sample_320:1/1;Sample_421:1/1;Sample_422:1/1;Sample_424:0/1;Sample_425:0/1;Sample_426:1/1;Sample_427:0/1;Sample_433:1/1;Sample_436:0/1;Sample_437:1/1;Sample_504:0/1;Sample_599:1/1;Sample_748:1/1;Sample_831:0/1;Sample_B-8274:1/1;Sample_B-8323:0/1	1	300679	300683	5	GTAAA	G	stop_lost&splice_region_variant&conservative_inframe_deletion	HIGH	CORT_0A01380	CPAR2_801330	orf19.2615	YLR188W	MDL1,MDL1	c.2083_*1delTAAA	p.Ter695del	2083/2085	695/694	character(0)	putative mitochondrial, half-size MDR-subfamily ABC transporter	;viable;	NULL|ABC transporter, integral membrane type 1|ABC transporter-like|ABC transporter, conserved site|AAA+ ATPase domain|ABC transporter, transmembrane domain, type 1|ABC transporter, transmembrane domain	|Molecular Function: ATP binding (GO:0005524), Molecular Function: ATPase activity (GO:0016887)|Molecular Function: nucleotide binding (GO:0000166), Molecular Function: nucleoside-triphosphatase activity (GO:0017111)|Molecular Function: ATP binding (GO:0005524), Biological Process: transport (GO:0006810), Cellular Component: integral to membrane (GO:0016021), Molecular Function: ATPase activity, …	FALSE
1_303594_A_AG	0.125988	0.09759	0.385758	0	0	0.39036	0.566947	0.218218	0	0.699854	0.377964	0	0	0.328976	0.773527	0.154303	0.436436	0.436436	0.218218	0.494872	0.890871	0.218218	Sample_151:1/1;Sample_1540:1/1;Sample_1825:1/1;Sample_185:1/1;Sample_282:1/1;Sample_320:1/1;Sample_421:1/1;Sample_422:1/1;Sample_424:0/1;Sample_425:0/1;Sample_426:0/1;Sample_427:0/1;Sample_433:1/1;Sample_436:0/1;Sample_437:1/1;Sample_504:0/1;Sample_599:1/1;Sample_748:1/1;Sample_831:0/1;Sample_B-8274:1/1;Sample_B-8323:0/1	1	303594	303594	1	A	AG	frameshift_variant	HIGH	CORT_0A01390	CPAR2_801340	orf19.2616	YLR189C	,ATG26	c.1971_1972insG	p.Ser658fs	1972/4821	658/1606	(CORT_0A01390|CORT_0A01390|1|1.00)	putative UDP-glucose:sterol glucosyltransferase	NA	NULL|UDP-glucuronosyl/UDP-glucosyltransferase|Glycosyl transferase, family 28|GRAM|Pleckstrin homology domain|Pleckstrin homology-like domain	|Biological Process: metabolic process (GO:0008152), Molecular Function: transferase activity, transferring hexosyl groups (GO:0016758)|Biological Process: carbohydrate metabolic process (GO:0005975), Molecular Function: transferase activity, transferring hexosyl groups (GO:0016758), Biological Process: lipid glycosylation (GO:0030259)|Molecular Function: protein binding (GO:0005515), Molecular F…	TRUE
1_303595_A_AAG	0.125988	0.09759	0.385758	0	0	0.39036	0.566947	0.218218	0	0.699854	0.377964	0	0	0.328976	0.773527	0.154303	0.436436	0.436436	0.218218	0.494872	0.890871	0.218218	Sample_151:1/1;Sample_1540:1/1;Sample_1825:1/1;Sample_185:1/1;Sample_282:1/1;Sample_320:1/1;Sample_421:1/1;Sample_422:1/1;Sample_424:0/1;Sample_425:0/1;Sample_426:0/1;Sample_427:0/1;Sample_433:1/1;Sample_436:0/1;Sample_437:1/1;Sample_504:0/1;Sample_599:1/1;Sample_748:1/1;Sample_831:0/1;Sample_B-8274:1/1;Sample_B-8323:0/1	1	303595	303595	1	A	AAG	frameshift_variant	HIGH	CORT_0A01390	CPAR2_801340	orf19.2616	YLR189C	,ATG26	c.1972_1973insAG	p.Ser658fs	1973/4821	658/1606	(CORT_0A01390|CORT_0A01390|1|1.00)	putative UDP-glucose:sterol glucosyltransferase	NA	NULL|UDP-glucuronosyl/UDP-glucosyltransferase|Glycosyl transferase, family 28|GRAM|Pleckstrin homology domain|Pleckstrin homology-like domain	|Biological Process: metabolic process (GO:0008152), Molecular Function: transferase activity, transferring hexosyl groups (GO:0016758)|Biological Process: carbohydrate metabolic process (GO:0005975), Molecular Function: transferase activity, transferring hexosyl groups (GO:0016758), Biological Process: lipid glycosylation (GO:0030259)|Molecular Function: protein binding (GO:0005515), Molecular F…	TRUE
1_333092_GAC_G	0.125988	0	0.308607	0	0	0.39036	0.629941	0.218218	0	0.699854	0.377964	0	0	0.328976	0.728025	0.154303	0.436436	0.436436	0.218218	0.494872	0.890871	0.218218	Sample_151:1/1;Sample_1540:1/1;Sample_1825:1/1;Sample_185:1/1;Sample_282:1/1;Sample_320:1/1;Sample_421:1/1;Sample_422:1/1;Sample_424:0/1;Sample_425:0/1;Sample_427:0/1;Sample_433:1/1;Sample_436:1/1;Sample_437:1/1;Sample_498:0/1;Sample_504:0/1;Sample_599:1/1;Sample_748:1/1;Sample_831:0/1;Sample_B-8274:1/1;Sample_B-8323:0/1	1	333092	333094	3	GAC	G	frameshift_variant	HIGH	CORT_0A01500	CPAR2_801440	orf19.2611	YGL201C	MCM6,MCM6	c.2318_2319delAC	p.Asp773fs	2318/2742	773/913	(CORT_0A01500|CORT_0A01500|1|1.00)	putative MCM DNA replication initiation complex component	;viable;	Mini-chromosome maintenance, DNA-dependent ATPase|Mini-chromosome maintenance, conserved site|NULL|Nucleic acid-binding, OB-fold|Nucleic acid-binding, OB-fold-like|Mini-chromosome maintenance complex protein 6	Molecular Function: DNA binding (GO:0003677), Molecular Function: ATP binding (GO:0005524), Biological Process: DNA replication (GO:0006260)||Molecular Function: DNA binding (GO:0003677), Molecular Function: ATP binding (GO:0005524), Cellular Component: nucleus (GO:0005634), Biological Process: DNA replication initiation (GO:0006270)	TRUE
1_333095_G_GTA	0.125988	0	0.308607	0	0	0.39036	0.629941	0.218218	0	0.699854	0.377964	0	0	0.328976	0.728025	0.154303	0.436436	0.436436	0.218218	0.494872	0.890871	0.218218	Sample_151:1/1;Sample_1540:1/1;Sample_1825:1/1;Sample_185:1/1;Sample_282:1/1;Sample_320:1/1;Sample_421:1/1;Sample_422:1/1;Sample_424:0/1;Sample_425:0/1;Sample_427:0/1;Sample_433:1/1;Sample_436:1/1;Sample_437:1/1;Sample_498:0/1;Sample_504:0/1;Sample_599:1/1;Sample_748:1/1;Sample_831:0/1;Sample_B-8274:1/1;Sample_B-8323:0/1	1	333095	333095	1	G	GTA	frameshift_variant	HIGH	CORT_0A01500	CPAR2_801440	orf19.2611	YGL201C	MCM6,MCM6	c.2320_2321insTA	p.Ala774fs	2321/2742	774/913	(CORT_0A01500|CORT_0A01500|1|1.00)	putative MCM DNA replication initiation complex component	;viable;	Mini-chromosome maintenance, DNA-dependent ATPase|Mini-chromosome maintenance, conserved site|NULL|Nucleic acid-binding, OB-fold|Nucleic acid-binding, OB-fold-like|Mini-chromosome maintenance complex protein 6	Molecular Function: DNA binding (GO:0003677), Molecular Function: ATP binding (GO:0005524), Biological Process: DNA replication (GO:0006260)||Molecular Function: DNA binding (GO:0003677), Molecular Function: ATP binding (GO:0005524), Cellular Component: nucleus (GO:0005634), Biological Process: DNA replication initiation (GO:0006270)	TRUE
1_334339_TG_T	0.129099	0	0.316228	0	0	0.3	0.580948	0.223607	0	0.657376	0.387298	0	0	0.26968	0.699379	0.158114	0.447214	0.447214	0.223607	0.507093	0.867227	0.223607	Sample_151:1/1;Sample_1540:1/1;Sample_1825:1/1;Sample_185:1/1;Sample_282:1/1;Sample_320:1/1;Sample_421:1/1;Sample_422:1/1;Sample_424:0/1;Sample_425:0/1;Sample_427:0/1;Sample_433:1/1;Sample_436:1/1;Sample_437:1/1;Sample_498:0/1;Sample_504:0/1;Sample_599:1/1;Sample_831:0/1;Sample_B-8274:1/1;Sample_B-8323:0/1	1	334339	334340	2	TG	T	frameshift_variant	HIGH	CORT_0A01510	CPAR2_801450	orf19.2612	---		c.369delC	p.Asn123fs	369/1110	123/369	(CORT_0A01510|CORT_0A01510|1|1.00)	putative zinc finger DNA-binding transcription factor	;survival rate in stationary phase: decreased;|;viable;|;biofilm formation: normal;|;competitive fitness: normal;R\I score is the median log2(R/I) value representing abundance of the mutant in recovered pool relative to inoculum|;colony appearance: normal;Morphology (M) score represents relative sizes of central and peripheral regions of colony|;vegetative growth: normal rate;|;viable;	Zinc finger C2H2-type/integrase DNA-binding domain|Zinc finger, C2H2|Zinc finger, C2H2-like|NULL	Molecular Function: nucleic acid binding (GO:0003676)|Molecular Function: zinc ion binding (GO:0008270)|Cellular Component: intracellular (GO:0005622), Molecular Function: zinc ion binding (GO:0008270)|	TRUE
1_334345_TCC_T	0.129099	0	0.316228	0	0	0.3	0.580948	0.223607	0	0.657376	0.387298	0	0	0.26968	0.699379	0.158114	0.447214	0.447214	0.223607	0.507093	0.867227	0.223607	Sample_151:1/1;Sample_1540:1/1;Sample_1825:1/1;Sample_185:1/1;Sample_282:1/1;Sample_320:1/1;Sample_421:1/1;Sample_422:1/1;Sample_424:0/1;Sample_425:0/1;Sample_427:0/1;Sample_433:1/1;Sample_436:1/1;Sample_437:1/1;Sample_498:0/1;Sample_504:0/1;Sample_599:1/1;Sample_831:0/1;Sample_B-8274:1/1;Sample_B-8323:0/1	1	334345	334347	3	TCC	T	frameshift_variant	HIGH	CORT_0A01510	CPAR2_801450	orf19.2612	---		c.362_363delGG	p.Gly121fs	363/1110	121/369	(CORT_0A01510|CORT_0A01510|1|1.00)	putative zinc finger DNA-binding transcription factor	;survival rate in stationary phase: decreased;|;viable;|;biofilm formation: normal;|;competitive fitness: normal;R\I score is the median log2(R/I) value representing abundance of the mutant in recovered pool relative to inoculum|;colony appearance: normal;Morphology (M) score represents relative sizes of central and peripheral regions of colony|;vegetative growth: normal rate;|;viable;	Zinc finger C2H2-type/integrase DNA-binding domain|Zinc finger, C2H2|Zinc finger, C2H2-like|NULL	Molecular Function: nucleic acid binding (GO:0003676)|Molecular Function: zinc ion binding (GO:0008270)|Cellular Component: intracellular (GO:0005622), Molecular Function: zinc ion binding (GO:0008270)|	TRUE
1_344050_GAA_G	0.129099	0.1	0.395285	0	0	0.3	0.516398	0.223607	0	0.657376	0.387298	0	0	0.26968	0.699379	0.158114	0.447214	0.447214	0.223607	0.507093	0.867227	0.223607	Sample_151:1/1;Sample_1540:1/1;Sample_1825:1/1;Sample_185:1/1;Sample_282:1/1;Sample_320:1/1;Sample_421:1/1;Sample_422:1/1;Sample_425:0/1;Sample_426:0/1;Sample_427:0/1;Sample_433:1/1;Sample_436:0/1;Sample_437:1/1;Sample_498:0/1;Sample_504:0/1;Sample_599:1/1;Sample_831:0/1;Sample_B-8274:1/1;Sample_B-8323:0/1	1	344050	344052	3	GAA	G	frameshift_variant	HIGH	CORT_0A01550	CPAR2_801480	orf19.5720	---		c.122_123delTT	p.Leu41fs	123/1539	41/512	(CORT_0A01550|CORT_0A01550|1|1.00)	predicted membrane transporter, member of the monocarboxylate porter (MCP) family, major facilitator superfamily (MFS)	;viable;	Major facilitator superfamily|NULL|Major facilitator superfamily domain|Major facilitator superfamily domain, general substrate transporter	Cellular Component: integral to membrane (GO:0016021), Biological Process: transmembrane transport (GO:0055085)|	TRUE
1_344053_G_GGA	0.129099	0.1	0.395285	0	0	0.3	0.516398	0.223607	0	0.657376	0.387298	0	0	0.26968	0.699379	0.158114	0.447214	0.447214	0.223607	0.507093	0.867227	0.223607	Sample_151:1/1;Sample_1540:1/1;Sample_1825:1/1;Sample_185:1/1;Sample_282:1/1;Sample_320:1/1;Sample_421:1/1;Sample_422:1/1;Sample_425:0/1;Sample_426:0/1;Sample_427:0/1;Sample_433:1/1;Sample_436:0/1;Sample_437:1/1;Sample_498:0/1;Sample_504:0/1;Sample_599:1/1;Sample_831:0/1;Sample_B-8274:1/1;Sample_B-8323:0/1	1	344053	344053	1	G	GGA	frameshift_variant	HIGH	CORT_0A01550	CPAR2_801480	orf19.5720	---		c.120_121insTC	p.Leu41fs	120/1539	40/512	(CORT_0A01550|CORT_0A01550|1|1.00)	predicted membrane transporter, member of the monocarboxylate porter (MCP) family, major facilitator superfamily (MFS)	;viable;	Major facilitator superfamily|NULL|Major facilitator superfamily domain|Major facilitator superfamily domain, general substrate transporter	Cellular Component: integral to membrane (GO:0016021), Biological Process: transmembrane transport (GO:0055085)|	TRUE
1_386168_A_AGC	0.240772	0.279751	0.368605	0.208514	0.208514	0.466252	0.662122	0.208514	0.208514	0.724462	0.240772	0.147442	0.240772	0.565825	0.826087	0.147442	0.208514	0.208514	0.208514	0.394055	0.851257	0.208514	Sample_151:1/1;Sample_1540:1/1;Sample_1799:1/1;Sample_1825:1/1;Sample_185:1/1;Sample_282:1/1;Sample_320:1/1;Sample_421:1/1;Sample_422:1/1;Sample_423:1/1;Sample_424:0/1;Sample_425:0/1;Sample_427:0/1;Sample_433:1/1;Sample_434:1/1;Sample_435:0/1;Sample_436:0/1;Sample_437:1/1;Sample_498:0/1;Sample_599:1/1;Sample_748:0/1;Sample_B-8274:1/1;Sample_B-8323:0/1	1	386168	386168	1	A	AGC	frameshift_variant	HIGH	CORT_0A01740	CPAR2_801660	orf19.4923	---		c.359_360insGC	p.Arg121fs	360/1149	120/382	(CORT_0A01740|CORT_0A01740|1|1.00)	predicted membrane transporter, member of the sugar porter (SP) family, major facilitator superfamily (MFS)	;viable;	Sugar transporter, conserved site|General substrate transporter|Major facilitator superfamily domain|Major facilitator superfamily domain, general substrate transporter|NULL	Molecular Function: transporter activity (GO:0005215), Biological Process: transport (GO:0006810), Cellular Component: membrane (GO:0016020), Biological Process: transmembrane transport (GO:0055085)|Cellular Component: integral to membrane (GO:0016021), Molecular Function: transmembrane transporter activity (GO:0022857), Biological Process: transmembrane transport (GO:0055085)|	TRUE
1_386170_CGT_C	0.240772	0.279751	0.368605	0.208514	0.208514	0.466252	0.662122	0.208514	0.208514	0.724462	0.240772	0.147442	0.240772	0.565825	0.826087	0.147442	0.208514	0.208514	0.208514	0.394055	0.851257	0.208514	Sample_151:1/1;Sample_1540:1/1;Sample_1799:1/1;Sample_1825:1/1;Sample_185:1/1;Sample_282:1/1;Sample_320:1/1;Sample_421:1/1;Sample_422:1/1;Sample_423:1/1;Sample_424:0/1;Sample_425:0/1;Sample_427:0/1;Sample_433:1/1;Sample_434:1/1;Sample_435:0/1;Sample_436:0/1;Sample_437:1/1;Sample_498:0/1;Sample_599:1/1;Sample_748:0/1;Sample_B-8274:1/1;Sample_B-8323:0/1	1	386170	386172	3	CGT	C	frameshift_variant	HIGH	CORT_0A01740	CPAR2_801660	orf19.4923	---		c.363_364delTG	p.Arg123fs	363/1149	121/382	(CORT_0A01740|CORT_0A01740|1|1.00)	predicted membrane transporter, member of the sugar porter (SP) family, major facilitator superfamily (MFS)	;viable;	Sugar transporter, conserved site|General substrate transporter|Major facilitator superfamily domain|Major facilitator superfamily domain, general substrate transporter|NULL	Molecular Function: transporter activity (GO:0005215), Biological Process: transport (GO:0006810), Cellular Component: membrane (GO:0016020), Biological Process: transmembrane transport (GO:0055085)|Cellular Component: integral to membrane (GO:0016021), Molecular Function: transmembrane transporter activity (GO:0022857), Biological Process: transmembrane transport (GO:0055085)|	TRUE
1_393356_T_G	0.23094	0.268328	0.424264	0.2	0.2	0.447214	0.635085	0.2	0.2	0.694879	0.34641	0.141421	0.23094	0.54272	0.834058	0.141421	0.4	0.4	0.2	0.52915	0.898146	0.2	Sample_151:1/1;Sample_1540:1/1;Sample_1799:1/1;Sample_1825:1/1;Sample_185:1/1;Sample_282:1/1;Sample_320:1/1;Sample_421:1/1;Sample_422:1/1;Sample_423:1/1;Sample_424:1/1;Sample_425:0/1;Sample_427:0/1;Sample_433:1/1;Sample_434:1/1;Sample_435:0/1;Sample_436:0/1;Sample_437:1/1;Sample_498:0/1;Sample_504:0/1;Sample_599:1/1;Sample_748:0/1;Sample_831:0/1;Sample_B-8274:1/1;Sample_B-8323:0/1	1	393356	393356	1	T	G	stop_gained	HIGH	CORT_0A01770	CPAR2_801690	orf19.4368	---		c.458T>G	p.Leu153*	458/2178	153/725	character(0)	hypothetical protein	;viable;	NULL|Peptidase M24, structural domain|Creatinase	|Biological Process: cellular process (GO:0009987)|Molecular Function: hydrolase activity (GO:0016787)	FALSE
1_488668_CCA_C	0.226455	0.350823	0.485363	0.196116	0.196116	0.438529	0.622752	0.196116	0.196116	0.681385	0.339683	0.138675	0.226455	0.532181	0.858754	0.138675	0.392232	0.392232	0.196116	0.518875	0.920737	0.196116	Sample_151:1/1;Sample_1540:1/1;Sample_1799:1/1;Sample_1825:1/1;Sample_185:1/1;Sample_282:1/1;Sample_320:1/1;Sample_421:1/1;Sample_422:1/1;Sample_423:1/1;Sample_424:0/1;Sample_425:0/1;Sample_426:1/1;Sample_427:0/1;Sample_433:1/1;Sample_434:1/1;Sample_435:0/1;Sample_436:0/1;Sample_437:1/1;Sample_498:0/1;Sample_504:0/1;Sample_599:1/1;Sample_748:0/1;Sample_831:0/1;Sample_B-8274:1/1;Sample_B-8323:0/1	1	488668	488670	3	CCA	C	frameshift_variant	HIGH	CORT_0A02140	CPAR2_802090	orf19.4400	---		c.368_369delTG	p.Met123fs	369/855	123/284	(CORT_0A02140|CORT_0A02140|1|1.00)	hypothetical protein	;invasive growth: decreased;	Anaphase-promoting complex, subunit 15/MND2	Cellular Component: anaphase-promoting complex (GO:0005680), Biological Process: regulation of mitotic metaphase/anaphase transition (GO:0030071), Biological Process: anaphase-promoting complex-dependent proteasomal ubiquitin-dependent protein catabolic process (GO:0031145)	TRUE
1_488671_T_TGC	0.226455	0.350823	0.485363	0.196116	0.196116	0.438529	0.622752	0.196116	0.196116	0.681385	0.339683	0.138675	0.226455	0.532181	0.858754	0.138675	0.392232	0.392232	0.196116	0.518875	0.920737	0.196116	Sample_151:1/1;Sample_1540:1/1;Sample_1799:1/1;Sample_1825:1/1;Sample_185:1/1;Sample_282:1/1;Sample_320:1/1;Sample_421:1/1;Sample_422:1/1;Sample_423:1/1;Sample_424:0/1;Sample_425:0/1;Sample_426:1/1;Sample_427:0/1;Sample_433:1/1;Sample_434:1/1;Sample_435:0/1;Sample_436:0/1;Sample_437:1/1;Sample_498:0/1;Sample_504:0/1;Sample_599:1/1;Sample_748:0/1;Sample_831:0/1;Sample_B-8274:1/1;Sample_B-8323:0/1	1	488671	488671	1	T	TGC	frameshift_variant	HIGH	CORT_0A02140	CPAR2_802090	orf19.4400	---		c.366_367insGC	p.Met123fs	366/855	122/284	(CORT_0A02140|CORT_0A02140|1|1.00)	hypothetical protein	;invasive growth: decreased;	Anaphase-promoting complex, subunit 15/MND2	Cellular Component: anaphase-promoting complex (GO:0005680), Biological Process: regulation of mitotic metaphase/anaphase transition (GO:0030071), Biological Process: anaphase-promoting complex-dependent proteasomal ubiquitin-dependent protein catabolic process (GO:0031145)	TRUE
1_490130_TAG_T	0.23094	0.268328	0.424264	0.2	0.2	0.447214	0.635085	0.2	0.2	0.694879	0.34641	0.141421	0.23094	0.54272	0.834058	0.141421	0.4	0.4	0.2	0.52915	0.898146	0.2	Sample_151:1/1;Sample_1540:1/1;Sample_1799:1/1;Sample_1825:1/1;Sample_185:1/1;Sample_282:1/1;Sample_320:1/1;Sample_421:1/1;Sample_422:1/1;Sample_423:1/1;Sample_424:0/1;Sample_425:0/1;Sample_427:0/1;Sample_433:1/1;Sample_434:1/1;Sample_435:0/1;Sample_436:0/1;Sample_437:1/1;Sample_498:0/1;Sample_504:0/1;Sample_599:1/1;Sample_748:0/1;Sample_831:0/1;Sample_B-8274:1/1;Sample_B-8323:0/1	1	490130	490132	3	TAG	T	frameshift_variant	HIGH	CORT_0A02150	CPAR2_802100	orf19.4399	YNL119W	,NCS2	c.385_386delCT	p.Leu129fs	386/1344	129/447	(CORT_0A02150|CORT_0A02150|1|1.00)	S. cerevisiae homolog NCS2 has role in protein urmylation, invasive growth in response to glucose limitation, tRNA wobble position uridine thiolation, pseudohyphal growth and localizes to cytoplasm	NA	Rossmann-like alpha/beta/alpha sandwich fold|NULL|Thiouridylase, cytoplasmic, subunit 2		TRUE
1_490135_G_GAT	0.23094	0.268328	0.424264	0.2	0.2	0.447214	0.635085	0.2	0.2	0.694879	0.34641	0.141421	0.23094	0.54272	0.834058	0.141421	0.4	0.4	0.2	0.52915	0.898146	0.2	Sample_151:1/1;Sample_1540:1/1;Sample_1799:1/1;Sample_1825:1/1;Sample_185:1/1;Sample_282:1/1;Sample_320:1/1;Sample_421:1/1;Sample_422:1/1;Sample_423:1/1;Sample_424:0/1;Sample_425:0/1;Sample_427:0/1;Sample_433:1/1;Sample_434:1/1;Sample_435:0/1;Sample_436:0/1;Sample_437:1/1;Sample_498:0/1;Sample_504:0/1;Sample_599:1/1;Sample_748:0/1;Sample_831:0/1;Sample_B-8274:1/1;Sample_B-8323:0/1	1	490135	490135	1	G	GAT	frameshift_variant	HIGH	CORT_0A02150	CPAR2_802100	orf19.4399	YNL119W	,NCS2	c.381_382insAT	p.Leu128fs	381/1344	127/447	(CORT_0A02150|CORT_0A02150|1|1.00)	S. cerevisiae homolog NCS2 has role in protein urmylation, invasive growth in response to glucose limitation, tRNA wobble position uridine thiolation, pseudohyphal growth and localizes to cytoplasm	NA	Rossmann-like alpha/beta/alpha sandwich fold|NULL|Thiouridylase, cytoplasmic, subunit 2		TRUE
1_492619_A_T	0	0.2	0.632456	0	0	0.4	0.258199	0	0	0.239046	0.258199	0	0	0	0.373002	0	0.894427	0.894427	0.447214	0.676123	0.456435	0	Sample_425:0/1;Sample_426:0/1;Sample_436:0/1;Sample_504:0/1;Sample_831:0/1	1	492619	492619	1	A	T	stop_gained	HIGH	CORT_0A02170	CPAR2_802120	orf19.4395	YMR092C	AIP1,	c.10A>T	p.Lys4*	10/1845	4/614	character(0)	putative actin cytoskeleton component	;viable;	WD40-repeat-containing domain|WD40/YVTN repeat-like-containing domain|NULL|WD40 repeat	Molecular Function: protein binding (GO:0005515)|	FALSE
1_497552_GAA_G	0.23094	0.357771	0.494975	0.2	0.2	0.447214	0.57735	0.2	0.2	0.694879	0.34641	0.141421	0.23094	0.54272	0.875761	0.141421	0.4	0.4	0.2	0.52915	0.898146	0.2	Sample_151:1/1;Sample_1540:1/1;Sample_1799:1/1;Sample_1825:1/1;Sample_185:1/1;Sample_282:1/1;Sample_320:1/1;Sample_421:1/1;Sample_422:1/1;Sample_423:1/1;Sample_424:0/1;Sample_425:0/1;Sample_426:0/1;Sample_427:1/1;Sample_433:1/1;Sample_434:1/1;Sample_435:1/1;Sample_436:0/1;Sample_437:1/1;Sample_504:0/1;Sample_599:1/1;Sample_748:0/1;Sample_831:0/1;Sample_B-8274:1/1;Sample_B-8323:0/1	1	497552	497554	3	GAA	G	frameshift_variant	HIGH	CORT_0A02190	CPAR2_802140	orf19.2384	YMR097C	MTG1,MTG1	c.4_5delTT	p.Phe2fs	5/1158	2/385	character(0)	S. cerevisiae homolog MTG1 has role in mitochondrial translation and localizes to mitochondrial inner membrane	;viable;	NULL|GTP binding domain|GTP-binding protein, orthogonal bundle domain	|Molecular Function: GTP binding (GO:0005525)	FALSE
1_503638_ACC_A	0.240772	0.373002	0.368605	0.208514	0.208514	0.373002	0.601929	0.208514	0.208514	0.668734	0.240772	0.147442	0.240772	0.565825	0.826087	0.147442	0.104257	0.104257	0.208514	0.315244	0.851257	0.208514	Sample_151:1/1;Sample_1540:1/1;Sample_1799:1/1;Sample_1825:1/1;Sample_185:1/1;Sample_282:1/1;Sample_320:1/1;Sample_421:1/1;Sample_422:1/1;Sample_423:1/1;Sample_424:0/1;Sample_425:0/1;Sample_426:0/1;Sample_427:1/1;Sample_433:1/1;Sample_434:1/1;Sample_435:1/1;Sample_437:1/1;Sample_498:0/1;Sample_599:1/1;Sample_748:0/1;Sample_B-8274:1/1;Sample_B-8323:0/1	1	503638	503640	3	ACC	A	frameshift_variant	HIGH	CORT_0A02250	CPAR2_802200	orf19.2393	---		c.250_251delCC	p.Pro84fs	250/1359	84/452	(CORT_0A02250|CORT_0A02250|1|1.00)	similar to C. parapsilosis CPAR2_802200 and C. albicans orf19.2393; putative transcription factor with zinc finger DNA-binding motif	;viable;|;biofilm formation: normal;	Zinc finger, CCCH-type|NULL	Molecular Function: nucleic acid binding (GO:0003676), Molecular Function: zinc ion binding (GO:0008270)|	TRUE
1_503642_C_CCG	0.240772	0.373002	0.368605	0.208514	0.208514	0.373002	0.601929	0.208514	0.208514	0.668734	0.240772	0.147442	0.240772	0.565825	0.826087	0.147442	0.104257	0.104257	0.208514	0.315244	0.851257	0.208514	Sample_151:1/1;Sample_1540:1/1;Sample_1799:1/1;Sample_1825:1/1;Sample_185:1/1;Sample_282:1/1;Sample_320:1/1;Sample_421:1/1;Sample_422:1/1;Sample_423:1/1;Sample_424:0/1;Sample_425:0/1;Sample_426:0/1;Sample_427:1/1;Sample_433:1/1;Sample_434:1/1;Sample_435:1/1;Sample_437:1/1;Sample_498:0/1;Sample_599:1/1;Sample_748:0/1;Sample_B-8274:1/1;Sample_B-8323:0/1	1	503642	503642	1	C	CCG	frameshift_variant	HIGH	CORT_0A02250	CPAR2_802200	orf19.2393	---		c.253_254insCG	p.Gln85fs	254/1359	85/452	(CORT_0A02250|CORT_0A02250|1|1.00)	similar to C. parapsilosis CPAR2_802200 and C. albicans orf19.2393; putative transcription factor with zinc finger DNA-binding motif	;viable;|;biofilm formation: normal;	Zinc finger, CCCH-type|NULL	Molecular Function: nucleic acid binding (GO:0003676), Molecular Function: zinc ion binding (GO:0008270)|	TRUE
1_513789_T_A	0.246183	0.381385	0.452267	0.213201	0.213201	0.381385	0.615457	0.213201	0	0.626783	0.246183	0.150756	0.246183	0.514259	0.800198	0.150756	0.213201	0.213201	0.213201	0.402911	0.913908	0.213201	Sample_151:1/1;Sample_1540:1/1;Sample_1799:1/1;Sample_1825:1/1;Sample_185:1/1;Sample_282:1/1;Sample_320:1/1;Sample_421:1/1;Sample_422:1/1;Sample_423:1/1;Sample_424:0/1;Sample_425:1/1;Sample_426:0/1;Sample_433:1/1;Sample_434:1/1;Sample_436:0/1;Sample_437:1/1;Sample_498:0/1;Sample_599:1/1;Sample_748:0/1;Sample_B-8274:1/1;Sample_B-8323:0/1	1	513789	513789	1	T	A	stop_gained	HIGH	CORT_0A02310	CPAR2_802260	orf19.2908	---		c.639T>A	p.Tyr213*	639/1083	213/360	character(0)	hypothetical protein	;viable;	NULL|NAD(P)-binding domain|Alcohol dehydrogenase, C-terminal|GroES-like|Alcohol dehydrogenase superfamily, zinc-type|Alcohol dehydrogenase GroES-like	|Molecular Function: nucleotide binding (GO:0000166)|Molecular Function: zinc ion binding (GO:0008270), Molecular Function: oxidoreductase activity (GO:0016491), Biological Process: oxidation-reduction process (GO:0055114)|Molecular Function: oxidoreductase activity (GO:0016491), Biological Process: oxidation-reduction process (GO:0055114)	FALSE
1_516483_GT_G	0.226455	0.350823	0.485363	0.196116	0.196116	0.438529	0.622752	0.196116	0.196116	0.681385	0.339683	0.138675	0.226455	0.532181	0.858754	0.138675	0.392232	0.392232	0.196116	0.518875	0.920737	0.196116	Sample_151:1/1;Sample_1540:1/1;Sample_1799:1/1;Sample_1825:1/1;Sample_185:1/1;Sample_282:1/1;Sample_320:1/1;Sample_421:1/1;Sample_422:1/1;Sample_423:1/1;Sample_424:0/1;Sample_425:1/1;Sample_426:1/1;Sample_427:1/1;Sample_433:1/1;Sample_434:1/1;Sample_435:1/1;Sample_436:1/1;Sample_437:1/1;Sample_498:0/1;Sample_504:1/1;Sample_599:1/1;Sample_748:0/1;Sample_831:1/1;Sample_B-8274:1/1;Sample_B-8323:1/1	1	516483	516484	2	GT	G	frameshift_variant	HIGH	CORT_0A02320	CPAR2_802270	orf19.2398	---		c.410delT	p.Phe137fs	410/2499	137/832	(CORT_0A02320|CORT_0A02320|1|1.00)	hypothetical protein	NA	Protein of unknown function DUF1752, fungi		TRUE
1_516490_T_TGG	0.226455	0.350823	0.485363	0.196116	0.196116	0.438529	0.622752	0.196116	0.196116	0.681385	0.339683	0.138675	0.226455	0.532181	0.858754	0.138675	0.392232	0.392232	0.196116	0.518875	0.920737	0.196116	Sample_151:1/1;Sample_1540:1/1;Sample_1799:1/1;Sample_1825:1/1;Sample_185:1/1;Sample_282:1/1;Sample_320:1/1;Sample_421:1/1;Sample_422:1/1;Sample_423:1/1;Sample_424:0/1;Sample_425:1/1;Sample_426:1/1;Sample_427:1/1;Sample_433:1/1;Sample_434:1/1;Sample_435:1/1;Sample_436:1/1;Sample_437:1/1;Sample_498:0/1;Sample_504:1/1;Sample_599:1/1;Sample_748:0/1;Sample_831:1/1;Sample_B-8274:1/1;Sample_B-8323:1/1	1	516490	516490	1	T	TGG	frameshift_variant	HIGH	CORT_0A02320	CPAR2_802270	orf19.2398	---		c.415_416insGG	p.Ser139fs	416/2499	139/832	(CORT_0A02320|CORT_0A02320|1|1.00)	hypothetical protein	NA	Protein of unknown function DUF1752, fungi		TRUE
1_516491_CTTTA_C	0.226455	0.350823	0.485363	0.196116	0.196116	0.438529	0.622752	0.196116	0.196116	0.681385	0.339683	0.138675	0.226455	0.532181	0.858754	0.138675	0.392232	0.392232	0.196116	0.518875	0.920737	0.196116	Sample_151:1/1;Sample_1540:1/1;Sample_1799:1/1;Sample_1825:1/1;Sample_185:1/1;Sample_282:1/1;Sample_320:1/1;Sample_421:1/1;Sample_422:1/1;Sample_423:1/1;Sample_424:0/1;Sample_425:1/1;Sample_426:1/1;Sample_427:1/1;Sample_433:1/1;Sample_434:1/1;Sample_435:1/1;Sample_436:1/1;Sample_437:1/1;Sample_498:0/1;Sample_504:1/1;Sample_599:1/1;Sample_748:0/1;Sample_831:1/1;Sample_B-8274:1/1;Sample_B-8323:1/1	1	516491	516495	5	CTTTA	C	frameshift_variant	HIGH	CORT_0A02320	CPAR2_802270	orf19.2398	---		c.417_420delTTTA	p.Leu140fs	417/2499	139/832	(CORT_0A02320|CORT_0A02320|1|1.00)	hypothetical protein	NA	Protein of unknown function DUF1752, fungi		TRUE
1_516570_T_TGAGGAAGA	0.226455	0.350823	0.485363	0.196116	0.196116	0.438529	0.622752	0.196116	0.196116	0.681385	0.339683	0.138675	0.226455	0.532181	0.858754	0.138675	0.392232	0.392232	0.196116	0.518875	0.920737	0.196116	Sample_151:1/1;Sample_1540:1/1;Sample_1799:1/1;Sample_1825:1/1;Sample_185:1/1;Sample_282:1/1;Sample_320:1/1;Sample_421:1/1;Sample_422:1/1;Sample_423:1/1;Sample_424:0/1;Sample_425:1/1;Sample_426:1/1;Sample_427:1/1;Sample_433:1/1;Sample_434:1/1;Sample_435:1/1;Sample_436:1/1;Sample_437:1/1;Sample_498:0/1;Sample_504:1/1;Sample_599:1/1;Sample_748:0/1;Sample_831:1/1;Sample_B-8274:1/1;Sample_B-8323:1/1	1	516570	516570	1	T	TGAGGAAGA	frameshift_variant	HIGH	CORT_0A02320	CPAR2_802270	orf19.2398	---		c.495_496insGAGGAAGA	p.Tyr166fs	496/2499	166/832	(CORT_0A02320|CORT_0A02320|1|1.00)	hypothetical protein	NA	Protein of unknown function DUF1752, fungi		TRUE
1_516571_T_TG	0.226455	0.350823	0.485363	0.196116	0.196116	0.438529	0.622752	0.196116	0.196116	0.681385	0.339683	0.138675	0.226455	0.532181	0.858754	0.138675	0.392232	0.392232	0.196116	0.518875	0.920737	0.196116	Sample_151:1/1;Sample_1540:1/1;Sample_1799:1/1;Sample_1825:1/1;Sample_185:1/1;Sample_282:1/1;Sample_320:1/1;Sample_421:1/1;Sample_422:1/1;Sample_423:1/1;Sample_424:0/1;Sample_425:1/1;Sample_426:1/1;Sample_427:1/1;Sample_433:1/1;Sample_434:1/1;Sample_435:1/1;Sample_436:1/1;Sample_437:1/1;Sample_498:0/1;Sample_504:1/1;Sample_599:1/1;Sample_748:0/1;Sample_831:1/1;Sample_B-8274:1/1;Sample_B-8323:1/1	1	516571	516571	1	T	TG	frameshift_variant&stop_gained	HIGH	CORT_0A02320	CPAR2_802270	orf19.2398	---		c.496_497insG	p.Tyr166fs	497/2499	166/832	(CORT_0A02320|CORT_0A02320|1|1.00)	hypothetical protein	NA	Protein of unknown function DUF1752, fungi		TRUE
1_516948_TTC_T	0.226455	0.350823	0.485363	0.196116	0.196116	0.438529	0.622752	0.196116	0.196116	0.681385	0.339683	0.138675	0.226455	0.532181	0.858754	0.138675	0.392232	0.392232	0.196116	0.518875	0.920737	0.196116	Sample_151:1/1;Sample_1540:1/1;Sample_1799:1/1;Sample_1825:1/1;Sample_185:1/1;Sample_282:1/1;Sample_320:1/1;Sample_421:1/1;Sample_422:1/1;Sample_423:1/1;Sample_424:0/1;Sample_425:1/1;Sample_426:1/1;Sample_427:1/1;Sample_433:1/1;Sample_434:1/1;Sample_435:1/1;Sample_436:1/1;Sample_437:1/1;Sample_498:0/1;Sample_504:1/1;Sample_599:1/1;Sample_748:0/1;Sample_831:1/1;Sample_B-8274:1/1;Sample_B-8323:1/1	1	516948	516950	3	TTC	T	frameshift_variant	HIGH	CORT_0A02320	CPAR2_802270	orf19.2398	---		c.874_875delTC	p.Ser292fs	874/2499	292/832	(CORT_0A02320|CORT_0A02320|1|1.00)	hypothetical protein	NA	Protein of unknown function DUF1752, fungi		TRUE
1_516952_T_TTC	0.226455	0.350823	0.485363	0.196116	0.196116	0.438529	0.622752	0.196116	0.196116	0.681385	0.339683	0.138675	0.226455	0.532181	0.858754	0.138675	0.392232	0.392232	0.196116	0.518875	0.920737	0.196116	Sample_151:1/1;Sample_1540:1/1;Sample_1799:1/1;Sample_1825:1/1;Sample_185:1/1;Sample_282:1/1;Sample_320:1/1;Sample_421:1/1;Sample_422:1/1;Sample_423:1/1;Sample_424:0/1;Sample_425:1/1;Sample_426:1/1;Sample_427:1/1;Sample_433:1/1;Sample_434:1/1;Sample_435:1/1;Sample_436:1/1;Sample_437:1/1;Sample_498:0/1;Sample_504:1/1;Sample_599:1/1;Sample_748:0/1;Sample_831:1/1;Sample_B-8274:1/1;Sample_B-8323:1/1	1	516952	516952	1	T	TTC	frameshift_variant	HIGH	CORT_0A02320	CPAR2_802270	orf19.2398	---		c.877_878insTC	p.Ser293fs	878/2499	293/832	(CORT_0A02320|CORT_0A02320|1|1.00)	hypothetical protein	NA	Protein of unknown function DUF1752, fungi		TRUE
1_520607_C_CT	0.226455	0.350823	0.485363	0.196116	0.196116	0.438529	0.622752	0.196116	0.196116	0.681385	0.339683	0.138675	0.226455	0.532181	0.858754	0.138675	0.392232	0.392232	0.196116	0.518875	0.920737	0.196116	Sample_151:1/1;Sample_1540:1/1;Sample_1799:1/1;Sample_1825:1/1;Sample_185:1/1;Sample_282:1/1;Sample_320:1/1;Sample_421:1/1;Sample_422:1/1;Sample_423:1/1;Sample_424:0/1;Sample_425:1/1;Sample_426:1/1;Sample_427:1/1;Sample_433:1/1;Sample_434:1/1;Sample_435:1/1;Sample_436:1/1;Sample_437:1/1;Sample_498:0/1;Sample_504:1/1;Sample_599:1/1;Sample_748:0/1;Sample_831:1/1;Sample_B-8274:1/1;Sample_B-8323:1/1	1	520607	520607	1	C	CT	frameshift_variant	HIGH	CORT_0A02330	CPAR2_802280	orf19.2399	YNL227C	JJJ1,	c.1794dupT	p.Pro599fs	1795/1842	599/613	character(0)	putative transcription factor with zinc finger DNA-binding motif	;viable;|;biofilm formation: normal;	NULL|Zinc finger, double-stranded RNA binding|Heat shock protein DnaJ, N-terminal|Zinc finger, C2H2|Zinc finger, C2H2-like|Heat shock protein DnaJ|Heat shock protein DnaJ, conserved site	|Molecular Function: heat shock protein binding (GO:0031072)|Molecular Function: zinc ion binding (GO:0008270)|Cellular Component: intracellular (GO:0005622), Molecular Function: zinc ion binding (GO:0008270)|Biological Process: protein folding (GO:0006457), Molecular Function: heat shock protein binding (GO:0031072), Molecular Function: unfolded protein binding (GO:0051082)	TRUE
1_520609_C_CATCTTTGGCATCAT	0.226455	0.350823	0.485363	0.196116	0.196116	0.438529	0.622752	0.196116	0.196116	0.681385	0.339683	0.138675	0.226455	0.532181	0.858754	0.138675	0.392232	0.392232	0.196116	0.518875	0.920737	0.196116	Sample_151:1/1;Sample_1540:1/1;Sample_1799:1/1;Sample_1825:1/1;Sample_185:1/1;Sample_282:1/1;Sample_320:1/1;Sample_421:1/1;Sample_422:1/1;Sample_423:1/1;Sample_424:0/1;Sample_425:1/1;Sample_426:1/1;Sample_427:1/1;Sample_433:1/1;Sample_434:1/1;Sample_435:1/1;Sample_436:1/1;Sample_437:1/1;Sample_498:0/1;Sample_504:1/1;Sample_599:1/1;Sample_748:0/1;Sample_831:1/1;Sample_B-8274:1/1;Sample_B-8323:1/1	1	520609	520609	1	C	CATCTTTGGCATCAT	frameshift_variant	HIGH	CORT_0A02330	CPAR2_802280	orf19.2399	YNL227C	JJJ1,	c.1795_1796insATCTTTGGCATCAT	p.Pro599fs	1796/1842	599/613	character(0)	putative transcription factor with zinc finger DNA-binding motif	;viable;|;biofilm formation: normal;	NULL|Zinc finger, double-stranded RNA binding|Heat shock protein DnaJ, N-terminal|Zinc finger, C2H2|Zinc finger, C2H2-like|Heat shock protein DnaJ|Heat shock protein DnaJ, conserved site	|Molecular Function: heat shock protein binding (GO:0031072)|Molecular Function: zinc ion binding (GO:0008270)|Cellular Component: intracellular (GO:0005622), Molecular Function: zinc ion binding (GO:0008270)|Biological Process: protein folding (GO:0006457), Molecular Function: heat shock protein binding (GO:0031072), Molecular Function: unfolded protein binding (GO:0051082)	TRUE
1_530148_TAG_T	0.226455	0.350823	0.485363	0.196116	0.196116	0.438529	0.622752	0.196116	0.196116	0.681385	0.339683	0.138675	0.226455	0.532181	0.858754	0.138675	0.392232	0.392232	0.196116	0.518875	0.920737	0.196116	Sample_151:1/1;Sample_1540:1/1;Sample_1799:1/1;Sample_1825:1/1;Sample_185:1/1;Sample_282:1/1;Sample_320:1/1;Sample_421:1/1;Sample_422:1/1;Sample_423:1/1;Sample_424:0/1;Sample_425:1/1;Sample_426:1/1;Sample_427:1/1;Sample_433:1/1;Sample_434:1/1;Sample_435:1/1;Sample_436:1/1;Sample_437:1/1;Sample_498:0/1;Sample_504:1/1;Sample_599:1/1;Sample_748:0/1;Sample_831:1/1;Sample_B-8274:1/1;Sample_B-8323:1/1	1	530148	530150	3	TAG	T	frameshift_variant	HIGH	CORT_0A02390	CPAR2_802340	orf19.2415	YOL033W	MSE1,	c.1495_1496delCT	p.Leu499fs	1496/1551	499/516	character(0)	S. cerevisiae homolog MSE1 has role in mitochondrial translation and localizes to mitochondrion	;viable;	Glutamyl/glutaminyl-tRNA synthetase, class Ib, catalytic domain|Glutamyl/glutaminyl-tRNA synthetase, class Ib|Glutamate-tRNA ligase, class Ib, bacterial/mitochondrial|Aminoacyl-tRNA synthetase, class I, anticodon-binding|NULL|Rossmann-like alpha/beta/alpha sandwich fold|Aminoacyl-tRNA synthetase, class I, anticodon-binding domain, subdomain 2|Glutamyl/glutaminyl-tRNA synthetase, class Ib, alpha-b…	Molecular Function: nucleotide binding (GO:0000166), Molecular Function: ATP binding (GO:0005524), Cellular Component: cytoplasm (GO:0005737), Molecular Function: ligase activity, forming aminoacyl-tRNA and related compounds (GO:0016876), Biological Process: tRNA aminoacylation (GO:0043039)|Molecular Function: nucleotide binding (GO:0000166), Molecular Function: glutamate-tRNA ligase activity (GO…	TRUE
1_530152_A_AGT	0.226455	0.350823	0.485363	0.196116	0.196116	0.438529	0.622752	0.196116	0.196116	0.681385	0.339683	0.138675	0.226455	0.532181	0.858754	0.138675	0.392232	0.392232	0.196116	0.518875	0.920737	0.196116	Sample_151:1/1;Sample_1540:1/1;Sample_1799:1/1;Sample_1825:1/1;Sample_185:1/1;Sample_282:1/1;Sample_320:1/1;Sample_421:1/1;Sample_422:1/1;Sample_423:1/1;Sample_424:0/1;Sample_425:1/1;Sample_426:1/1;Sample_427:1/1;Sample_433:1/1;Sample_434:1/1;Sample_435:1/1;Sample_436:1/1;Sample_437:1/1;Sample_498:0/1;Sample_504:1/1;Sample_599:1/1;Sample_748:0/1;Sample_831:1/1;Sample_B-8274:1/1;Sample_B-8323:1/1	1	530152	530152	1	A	AGT	frameshift_variant	HIGH	CORT_0A02390	CPAR2_802340	orf19.2415	YOL033W	MSE1,	c.1492_1493insAC	p.Leu498fs	1492/1551	498/516	character(0)	S. cerevisiae homolog MSE1 has role in mitochondrial translation and localizes to mitochondrion	;viable;	Glutamyl/glutaminyl-tRNA synthetase, class Ib, catalytic domain|Glutamyl/glutaminyl-tRNA synthetase, class Ib|Glutamate-tRNA ligase, class Ib, bacterial/mitochondrial|Aminoacyl-tRNA synthetase, class I, anticodon-binding|NULL|Rossmann-like alpha/beta/alpha sandwich fold|Aminoacyl-tRNA synthetase, class I, anticodon-binding domain, subdomain 2|Glutamyl/glutaminyl-tRNA synthetase, class Ib, alpha-b…	Molecular Function: nucleotide binding (GO:0000166), Molecular Function: ATP binding (GO:0005524), Cellular Component: cytoplasm (GO:0005737), Molecular Function: ligase activity, forming aminoacyl-tRNA and related compounds (GO:0016876), Biological Process: tRNA aminoacylation (GO:0043039)|Molecular Function: nucleotide binding (GO:0000166), Molecular Function: glutamate-tRNA ligase activity (GO…	TRUE
1_555953_G_A	0.353553	0.365148	0.505181	0.204124	0.204124	0.456435	0.589256	0.204124	0.204124	0.600099	0.353553	0.288675	0.353553	0.615457	0.808694	0.144338	0.408248	0.408248	0.204124	0.46291	0.916667	0.204124	Sample_151:1/1;Sample_1540:1/1;Sample_1799:1/1;Sample_1825:1/1;Sample_185:1/1;Sample_282:1/1;Sample_320:1/1;Sample_421:1/1;Sample_422:1/1;Sample_423:1/1;Sample_424:0/1;Sample_425:0/1;Sample_428:1/1;Sample_433:1/1;Sample_434:1/1;Sample_435:0/1;Sample_436:0/1;Sample_437:1/1;Sample_498:0/1;Sample_504:1/1;Sample_599:1/1;Sample_748:0/1;Sample_831:1/1;Sample_B-8274:1/1	1	555953	555953	1	G	A	stop_gained	HIGH	CORT_0A02510	CPAR2_802460	orf19.3268	YKL056C	TMA19,TMA19	c.76C>T	p.Arg26*	76/621	26/206	character(0)	putative cell wall protein, similar to S. cerevisiae Tma19p (Ykl065cp)	;invasive growth: decreased;	Mss4/translationally controlled tumour-associated TCTP|Translationally controlled tumour protein|Translationally controlled tumour protein, conserved site|NULL|Mss4-like		FALSE
1_688603_AGGAGAGGAAGAAGAAGAAGAAGAT_AGAGAGGAAGAAGAAGAAGAAGAT	0.123091	0.0953463	0.376889	0	0	0.381385	0.615457	0.213201	0.213201	0.683763	0.369274	0	0	0.321412	0.755742	0.150756	0.426401	0.426401	0.213201	0.483494	0.870388	0.213201	Sample_151:1/1;Sample_1540:1/1;Sample_1825:1/1;Sample_185:1/1;Sample_282:1/1;Sample_320:1/1;Sample_421:1/1;Sample_422:1/1;Sample_424:0/1;Sample_425:0/1;Sample_426:1/1;Sample_427:0/1;Sample_433:1/1;Sample_435:1/1;Sample_436:0/1;Sample_437:1/1;Sample_498:0/1;Sample_504:0/1;Sample_599:1/1;Sample_831:0/1;Sample_B-8274:1/1;Sample_B-8323:0/1	1	688603	688627	25	AGGAGAGGAAGAAGAAGAAGAAGAT	AGAGAGGAAGAAGAAGAAGAAGAT	frameshift_variant	HIGH	CORT_0A03200	CPAR2_803260	orf19.3237	YKL010C	UFD4,	c.311delG	p.Gly104fs	311/5223	104/1740	(CORT_0A03200|CORT_0A03200|1|1.00)	S. cerevisiae homolog UFD4 localizes to mitochondrion	;viable;|;competitive fitness: normal;R\I score is the median log2(R/I) value representing abundance of the mutant in recovered pool relative to inoculum|;colony appearance: normal;Morphology (M) score represents relative sizes of central and peripheral regions of colony|;vegetative growth: normal rate;|;viable;	NULL|Armadillo-type fold|HECT|Armadillo-like helical	|Molecular Function: binding (GO:0005488)|Molecular Function: ubiquitin-protein ligase activity (GO:0004842), Cellular Component: intracellular (GO:0005622), Biological Process: cellular protein modification process (GO:0006464)	TRUE
1_688607_GAGGAAGAAGAA_G	0.123091	0.0953463	0.376889	0	0	0.381385	0.615457	0.213201	0.213201	0.683763	0.369274	0	0	0.321412	0.755742	0.150756	0.426401	0.426401	0.213201	0.483494	0.870388	0.213201	Sample_151:1/1;Sample_1540:1/1;Sample_1825:1/1;Sample_185:1/1;Sample_282:1/1;Sample_320:1/1;Sample_421:1/1;Sample_422:1/1;Sample_424:0/1;Sample_425:0/1;Sample_426:1/1;Sample_427:0/1;Sample_433:1/1;Sample_435:1/1;Sample_436:0/1;Sample_437:1/1;Sample_498:0/1;Sample_504:0/1;Sample_599:1/1;Sample_831:0/1;Sample_B-8274:1/1;Sample_B-8323:0/1	1	688607	688618	12	GAGGAAGAAGAA	G	frameshift_variant	HIGH	CORT_0A03200	CPAR2_803260	orf19.3237	YKL010C	UFD4,	c.314_324delAGGAAGAAGAA	p.Glu105fs	314/5223	105/1740	(CORT_0A03200|CORT_0A03200|1|1.00)	S. cerevisiae homolog UFD4 localizes to mitochondrion	;viable;|;competitive fitness: normal;R\I score is the median log2(R/I) value representing abundance of the mutant in recovered pool relative to inoculum|;colony appearance: normal;Morphology (M) score represents relative sizes of central and peripheral regions of colony|;vegetative growth: normal rate;|;viable;	NULL|Armadillo-type fold|HECT|Armadillo-like helical	|Molecular Function: binding (GO:0005488)|Molecular Function: ubiquitin-protein ligase activity (GO:0004842), Cellular Component: intracellular (GO:0005622), Biological Process: cellular protein modification process (GO:0006464)	TRUE
1_690640_T_TA	0.23094	0.357771	0.494975	0.2	0.2	0.357771	0.57735	0.2	0.2	0.641427	0.34641	0.141421	0.23094	0.482418	0.834058	0.141421	0.4	0.4	0.2	0.52915	0.898146	0.2	Sample_151:1/1;Sample_1540:1/1;Sample_1799:1/1;Sample_1825:1/1;Sample_185:1/1;Sample_282:1/1;Sample_320:1/1;Sample_421:1/1;Sample_422:1/1;Sample_423:0/1;Sample_424:0/1;Sample_425:0/1;Sample_426:1/1;Sample_427:0/1;Sample_433:1/1;Sample_434:1/1;Sample_435:1/1;Sample_436:0/1;Sample_437:1/1;Sample_498:0/1;Sample_504:0/1;Sample_599:1/1;Sample_831:0/1;Sample_B-8274:1/1;Sample_B-8323:0/1	1	690640	690640	1	T	TA	frameshift_variant	HIGH	CORT_0A03200	CPAR2_803260	orf19.3237	YKL010C	UFD4,	c.2346_2347insA	p.Ala783fs	2347/5223	783/1740	(CORT_0A03200|CORT_0A03200|1|1.00)	S. cerevisiae homolog UFD4 localizes to mitochondrion	;viable;|;competitive fitness: normal;R\I score is the median log2(R/I) value representing abundance of the mutant in recovered pool relative to inoculum|;colony appearance: normal;Morphology (M) score represents relative sizes of central and peripheral regions of colony|;vegetative growth: normal rate;|;viable;	NULL|Armadillo-type fold|HECT|Armadillo-like helical	|Molecular Function: binding (GO:0005488)|Molecular Function: ubiquitin-protein ligase activity (GO:0004842), Cellular Component: intracellular (GO:0005622), Biological Process: cellular protein modification process (GO:0006464)	FALSE
1_703836_TGC_T	0.23094	0.357771	0.494975	0.2	0.2	0.357771	0.57735	0.2	0.2	0.641427	0.34641	0.141421	0.23094	0.482418	0.834058	0.141421	0.4	0.4	0.2	0.52915	0.898146	0.2	Sample_151:1/1;Sample_1540:1/1;Sample_1799:1/1;Sample_1825:1/1;Sample_185:1/1;Sample_282:1/1;Sample_320:1/1;Sample_421:1/1;Sample_422:1/1;Sample_423:0/1;Sample_424:0/1;Sample_425:1/1;Sample_426:1/1;Sample_427:1/1;Sample_433:1/1;Sample_434:0/1;Sample_435:1/1;Sample_436:1/1;Sample_437:1/1;Sample_498:0/1;Sample_504:1/1;Sample_599:1/1;Sample_831:1/1;Sample_B-8274:1/1;Sample_B-8323:1/1	1	703836	703838	3	TGC	T	frameshift_variant	HIGH	CORT_0A03260	CPAR2_803210	orf19.3247	YJL207C	LAA1,	c.3331_3332delGC	p.Ala1111fs	3331/6396	1111/2131	(CORT_0A03260|CORT_0A03260|1|1.00)	similar to C. parapsilosis CPAR2_803210 and C. albicans orf19.3247similar to S. cerevisiae Laa1p	;viable;|;inviable;homozygous null mutant strain could not be recovered, suggesting that the gene is essential under the selection conditions	NULL|Armadillo-type fold	|Molecular Function: binding (GO:0005488)	TRUE
1_703842_T_TTC	0.23094	0.357771	0.494975	0.2	0.2	0.357771	0.57735	0.2	0.2	0.641427	0.34641	0.141421	0.23094	0.482418	0.834058	0.141421	0.4	0.4	0.2	0.52915	0.898146	0.2	Sample_151:1/1;Sample_1540:1/1;Sample_1799:1/1;Sample_1825:1/1;Sample_185:1/1;Sample_282:1/1;Sample_320:1/1;Sample_421:1/1;Sample_422:1/1;Sample_423:0/1;Sample_424:0/1;Sample_425:1/1;Sample_426:1/1;Sample_427:1/1;Sample_433:1/1;Sample_434:0/1;Sample_435:1/1;Sample_436:1/1;Sample_437:1/1;Sample_498:0/1;Sample_504:1/1;Sample_599:1/1;Sample_831:1/1;Sample_B-8274:1/1;Sample_B-8323:1/1	1	703842	703842	1	T	TTC	frameshift_variant	HIGH	CORT_0A03260	CPAR2_803210	orf19.3247	YJL207C	LAA1,	c.3336_3337insTC	p.Leu1113fs	3337/6396	1113/2131	(CORT_0A03260|CORT_0A03260|1|1.00)	similar to C. parapsilosis CPAR2_803210 and C. albicans orf19.3247similar to S. cerevisiae Laa1p	;viable;|;inviable;homozygous null mutant strain could not be recovered, suggesting that the gene is essential under the selection conditions	NULL|Armadillo-type fold	|Molecular Function: binding (GO:0005488)	TRUE
1_710778_A_T	0.226455	0.350823	0.485363	0.196116	0.196116	0.438529	0.622752	0.196116	0.196116	0.681385	0.339683	0.138675	0.226455	0.532181	0.858754	0.138675	0.392232	0.392232	0.196116	0.518875	0.920737	0.196116	Sample_151:1/1;Sample_1540:1/1;Sample_1799:1/1;Sample_1825:1/1;Sample_185:1/1;Sample_282:1/1;Sample_320:1/1;Sample_421:1/1;Sample_422:1/1;Sample_423:0/1;Sample_424:0/1;Sample_425:0/1;Sample_426:0/1;Sample_427:0/1;Sample_433:1/1;Sample_434:0/1;Sample_435:0/1;Sample_436:0/1;Sample_437:1/1;Sample_498:0/1;Sample_504:0/1;Sample_599:1/1;Sample_748:0/1;Sample_831:0/1;Sample_B-8274:1/1;Sample_B-8323:1/1	1	710778	710778	1	A	T	stop_gained	HIGH	CORT_0A03280	CPAR2_803190	---	---		c.455T>A	p.Leu152*	455/1590	152/529	character(0)	hypothetical protein	NA	NA	NA	TRUE
1_710785_AGT_A	0.226455	0.350823	0.485363	0.196116	0.196116	0.438529	0.622752	0.196116	0.196116	0.681385	0.339683	0.138675	0.226455	0.532181	0.858754	0.138675	0.392232	0.392232	0.196116	0.518875	0.920737	0.196116	Sample_151:1/1;Sample_1540:1/1;Sample_1799:1/1;Sample_1825:1/1;Sample_185:1/1;Sample_282:1/1;Sample_320:1/1;Sample_421:1/1;Sample_422:1/1;Sample_423:0/1;Sample_424:0/1;Sample_425:0/1;Sample_426:0/1;Sample_427:0/1;Sample_433:1/1;Sample_434:0/1;Sample_435:0/1;Sample_436:0/1;Sample_437:1/1;Sample_498:0/1;Sample_504:0/1;Sample_599:1/1;Sample_748:0/1;Sample_831:0/1;Sample_B-8274:1/1;Sample_B-8323:1/1	1	710785	710787	3	AGT	A	frameshift_variant	HIGH	CORT_0A03280	CPAR2_803190	---	---		c.446_447delAC	p.Asp149fs	447/1590	149/529	(CORT_0A03280|CORT_0A03280|1|1.00)	hypothetical protein	NA	NA	NA	TRUE
1_710788_C_CCT	0.226455	0.350823	0.485363	0.196116	0.196116	0.438529	0.622752	0.196116	0.196116	0.681385	0.339683	0.138675	0.226455	0.532181	0.858754	0.138675	0.392232	0.392232	0.196116	0.518875	0.920737	0.196116	Sample_151:1/1;Sample_1540:1/1;Sample_1799:1/1;Sample_1825:1/1;Sample_185:1/1;Sample_282:1/1;Sample_320:1/1;Sample_421:1/1;Sample_422:1/1;Sample_423:0/1;Sample_424:0/1;Sample_425:0/1;Sample_426:0/1;Sample_427:0/1;Sample_433:1/1;Sample_434:0/1;Sample_435:0/1;Sample_436:0/1;Sample_437:1/1;Sample_498:0/1;Sample_504:0/1;Sample_599:1/1;Sample_748:0/1;Sample_831:0/1;Sample_B-8274:1/1;Sample_B-8323:1/1	1	710788	710788	1	C	CCT	frameshift_variant	HIGH	CORT_0A03280	CPAR2_803190	---	---		c.444_445insAG	p.Asp149fs	444/1590	148/529	(CORT_0A03280|CORT_0A03280|1|1.00)	hypothetical protein	NA	NA	NA	TRUE
1_712033_CA_C	0.226455	0.350823	0.485363	0.196116	0.196116	0.438529	0.622752	0.196116	0.196116	0.681385	0.339683	0.138675	0.226455	0.532181	0.858754	0.138675	0.392232	0.392232	0.196116	0.518875	0.920737	0.196116	Sample_151:1/1;Sample_1540:1/1;Sample_1799:1/1;Sample_1825:1/1;Sample_185:1/1;Sample_282:1/1;Sample_320:1/1;Sample_421:1/1;Sample_422:1/1;Sample_423:0/1;Sample_424:0/1;Sample_425:0/1;Sample_426:0/1;Sample_427:0/1;Sample_433:1/1;Sample_434:0/1;Sample_435:0/1;Sample_436:0/1;Sample_437:1/1;Sample_498:0/1;Sample_504:0/1;Sample_599:1/1;Sample_748:0/1;Sample_831:0/1;Sample_B-8274:1/1;Sample_B-8323:1/1	1	712033	712034	2	CA	C	frameshift_variant	HIGH	CORT_0A03290	CPAR2_803270	orf19.2319	YDR365C	ESF1,	c.1551delT	p.Gly518fs	1551/1971	517/656	(CORT_0A03290|CORT_0A03290|1|1.00)	putative nucleolar protein with a predicted role in pre-rRNA processing	;viable;	NULL|NUC153	|Cellular Component: nucleus (GO:0005634)	TRUE
1_712038_TCC_T	0.226455	0.350823	0.485363	0.196116	0.196116	0.438529	0.622752	0.196116	0.196116	0.681385	0.339683	0.138675	0.226455	0.532181	0.858754	0.138675	0.392232	0.392232	0.196116	0.518875	0.920737	0.196116	Sample_151:1/1;Sample_1540:1/1;Sample_1799:1/1;Sample_1825:1/1;Sample_185:1/1;Sample_282:1/1;Sample_320:1/1;Sample_421:1/1;Sample_422:1/1;Sample_423:0/1;Sample_424:0/1;Sample_425:0/1;Sample_426:0/1;Sample_427:0/1;Sample_433:1/1;Sample_434:0/1;Sample_435:0/1;Sample_436:0/1;Sample_437:1/1;Sample_498:0/1;Sample_504:0/1;Sample_599:1/1;Sample_748:0/1;Sample_831:0/1;Sample_B-8274:1/1;Sample_B-8323:1/1	1	712038	712040	3	TCC	T	frameshift_variant	HIGH	CORT_0A03290	CPAR2_803270	orf19.2319	YDR365C	ESF1,	c.1545_1546delGG	p.Glu516fs	1546/1971	515/656	(CORT_0A03290|CORT_0A03290|1|1.00)	putative nucleolar protein with a predicted role in pre-rRNA processing	;viable;	NULL|NUC153	|Cellular Component: nucleus (GO:0005634)	TRUE
1_737265_TTGAA_T	0.132453	0.102598	0.405554	0	0	0.410391	0.662266	0.229416	0	0.674453	0.39736	0	0	0.345857	0.669711	0.162221	0.458831	0.458831	0.229416	0.520266	0.889757	0.229416	Sample_151:1/1;Sample_1540:1/1;Sample_1825:1/1;Sample_185:1/1;Sample_421:1/1;Sample_422:1/1;Sample_424:0/1;Sample_425:0/1;Sample_426:0/1;Sample_433:1/1;Sample_436:0/1;Sample_437:1/1;Sample_498:0/1;Sample_504:0/1;Sample_599:1/1;Sample_748:0/1;Sample_831:0/1;Sample_B-8274:1/1;Sample_B-8323:0/1	1	737265	737269	5	TTGAA	T	frameshift_variant	HIGH	CORT_0A03410	CPAR2_803390	orf19.6266	---		c.956_959delTTCA	p.Phe319fs	959/2775	319/924	(CORT_0A03410|CORT_0A03410|1|1.00)	hypothetical protein	NA	NA	NA	TRUE
1_737271_G_GGGCA	0.132453	0.102598	0.405554	0	0	0.410391	0.662266	0.229416	0	0.674453	0.39736	0	0	0.345857	0.669711	0.162221	0.458831	0.458831	0.229416	0.520266	0.889757	0.229416	Sample_151:1/1;Sample_1540:1/1;Sample_1825:1/1;Sample_185:1/1;Sample_421:1/1;Sample_422:1/1;Sample_424:0/1;Sample_425:0/1;Sample_426:0/1;Sample_433:1/1;Sample_436:0/1;Sample_437:1/1;Sample_498:0/1;Sample_504:0/1;Sample_599:1/1;Sample_748:0/1;Sample_831:0/1;Sample_B-8274:1/1;Sample_B-8323:0/1	1	737271	737271	1	G	GGGCA	frameshift_variant	HIGH	CORT_0A03410	CPAR2_803390	orf19.6266	---		c.953_954insTGCC	p.Phe319fs	953/2775	318/924	(CORT_0A03410|CORT_0A03410|1|1.00)	hypothetical protein	NA	NA	NA	TRUE
1_744747_C_CTTGTT	0.132453	0.102598	0.405554	0	0	0.410391	0.662266	0.229416	0	0.674453	0.39736	0	0	0.345857	0.669711	0.162221	0.458831	0.458831	0.229416	0.520266	0.889757	0.229416	Sample_151:1/1;Sample_1540:1/1;Sample_1825:1/1;Sample_185:1/1;Sample_421:1/1;Sample_422:1/1;Sample_424:0/1;Sample_425:0/1;Sample_426:1/1;Sample_433:1/1;Sample_436:0/1;Sample_437:1/1;Sample_498:0/1;Sample_504:0/1;Sample_599:1/1;Sample_748:0/1;Sample_831:0/1;Sample_B-8274:1/1;Sample_B-8323:0/1	1	744747	744747	1	C	CTTGTT	frameshift_variant	HIGH	CORT_0A03470	CPAR2_803450	orf19.4850	YPL260W	YPL260W,	c.1725_1726insAACAA	p.Glu576fs	1725/2076	575/691	(CORT_0A03470|CORT_0A03470|1|1.00)	hypothetical protein	;viable;	Uncharacterised protein family UPF0662		FALSE
1_746396_GGGGT_G	0.136083	0	0.333333	0	0	0.421637	0.680414	0.235702	0	0.692935	0.408248	0	0	0.355335	0.638915	0.166667	0.471405	0.471405	0.235702	0.534522	0.866025	0.235702	Sample_151:1/1;Sample_1540:1/1;Sample_1825:1/1;Sample_185:1/1;Sample_421:1/1;Sample_422:1/1;Sample_424:0/1;Sample_425:0/1;Sample_433:1/1;Sample_436:0/1;Sample_437:1/1;Sample_498:0/1;Sample_504:0/1;Sample_599:1/1;Sample_748:0/1;Sample_831:0/1;Sample_B-8274:1/1;Sample_B-8323:0/1	1	746396	746400	5	GGGGT	G	frameshift_variant	HIGH	CORT_0A03470	CPAR2_803450	orf19.4850	YPL260W	YPL260W,	c.73_76delACCC	p.Thr25fs	76/2076	25/691	character(0)	hypothetical protein	;viable;	Uncharacterised protein family UPF0662		TRUE
1_746402_A_AT	0.136083	0	0.333333	0	0	0.421637	0.680414	0.235702	0	0.692935	0.408248	0	0	0.355335	0.638915	0.166667	0.471405	0.471405	0.235702	0.534522	0.866025	0.235702	Sample_151:1/1;Sample_1540:1/1;Sample_1825:1/1;Sample_185:1/1;Sample_421:1/1;Sample_422:1/1;Sample_424:0/1;Sample_425:0/1;Sample_433:1/1;Sample_436:0/1;Sample_437:1/1;Sample_498:0/1;Sample_504:0/1;Sample_599:1/1;Sample_748:0/1;Sample_831:0/1;Sample_B-8274:1/1;Sample_B-8323:0/1	1	746402	746402	1	A	AT	frameshift_variant	HIGH	CORT_0A03470	CPAR2_803450	orf19.4850	YPL260W	YPL260W,	c.70dupA	p.Ile24fs	70/2076	24/691	character(0)	hypothetical protein	;viable;	Uncharacterised protein family UPF0662		TRUE
1_791944_TC_T	0.23094	0.357771	0.424264	0.2	0.2	0.357771	0.57735	0.2	0.2	0.641427	0.34641	0.141421	0.23094	0.54272	0.834058	0.141421	0.3	0.3	0.2	0.453557	0.898146	0.2	Sample_151:1/1;Sample_1540:1/1;Sample_1799:1/1;Sample_1825:1/1;Sample_185:1/1;Sample_282:0/1;Sample_320:0/1;Sample_421:1/1;Sample_422:1/1;Sample_423:0/1;Sample_424:0/1;Sample_425:0/1;Sample_426:1/1;Sample_427:1/1;Sample_433:1/1;Sample_434:0/1;Sample_435:1/1;Sample_437:1/1;Sample_498:0/1;Sample_504:0/1;Sample_599:1/1;Sample_748:0/1;Sample_831:0/1;Sample_B-8274:1/1;Sample_B-8323:0/1	1	791944	791945	2	TC	T	frameshift_variant	HIGH	CORT_0A03670	CPAR2_803650	orf19.4829	YKL213C	DOA1,DOA1	c.30delC	p.Leu12fs	30/2514	10/837	character(0)	protein similar to S. cerevisiae Doa1p, which is involved in ubiquitin-mediated protein degradation	isoflurane;resistance to chemicals: decreased;|itraconazole;resistance to chemicals: decreased;|propranolol;resistance to chemicals: decreased;|sodium dodecyl sulfate;resistance to chemicals: decreased;|;viable;|;viable;|;protein activity: decreased;|caffeine;resistance to chemicals: decreased;|butan-1-ol;resistance to chemicals: decreased;|;filamentous growth: abnormal;mixture of pseudohyphae an…	WD40-repeat-containing domain|G-protein beta WD-40 repeat|PUL|WD40 repeat|PLAA family ubiquitin binding, PFU|NULL|WD40/YVTN repeat-like-containing domain|WD40 repeat, conserved site	Molecular Function: protein binding (GO:0005515)|	FALSE
1_791956_CCG_C	0.23094	0.357771	0.424264	0.2	0.2	0.357771	0.57735	0.2	0.2	0.641427	0.34641	0.141421	0.23094	0.54272	0.834058	0.141421	0.3	0.3	0.2	0.453557	0.898146	0.2	Sample_151:1/1;Sample_1540:1/1;Sample_1799:1/1;Sample_1825:1/1;Sample_185:1/1;Sample_282:0/1;Sample_320:0/1;Sample_421:1/1;Sample_422:1/1;Sample_423:0/1;Sample_424:0/1;Sample_425:0/1;Sample_426:1/1;Sample_427:1/1;Sample_433:1/1;Sample_434:0/1;Sample_435:1/1;Sample_437:1/1;Sample_498:0/1;Sample_504:0/1;Sample_599:1/1;Sample_748:0/1;Sample_831:0/1;Sample_B-8274:1/1;Sample_B-8323:0/1	1	791956	791958	3	CCG	C	frameshift_variant	HIGH	CORT_0A03670	CPAR2_803650	orf19.4829	YKL213C	DOA1,DOA1	c.43_44delGC	p.Ala15fs	43/2514	15/837	character(0)	protein similar to S. cerevisiae Doa1p, which is involved in ubiquitin-mediated protein degradation	isoflurane;resistance to chemicals: decreased;|itraconazole;resistance to chemicals: decreased;|propranolol;resistance to chemicals: decreased;|sodium dodecyl sulfate;resistance to chemicals: decreased;|;viable;|;viable;|;protein activity: decreased;|caffeine;resistance to chemicals: decreased;|butan-1-ol;resistance to chemicals: decreased;|;filamentous growth: abnormal;mixture of pseudohyphae an…	WD40-repeat-containing domain|G-protein beta WD-40 repeat|PUL|WD40 repeat|PLAA family ubiquitin binding, PFU|NULL|WD40/YVTN repeat-like-containing domain|WD40 repeat, conserved site	Molecular Function: protein binding (GO:0005515)|	TRUE
1_791962_T_TTTG	0.23094	0.357771	0.424264	0.2	0.2	0.357771	0.57735	0.2	0.2	0.641427	0.34641	0.141421	0.23094	0.54272	0.834058	0.141421	0.3	0.3	0.2	0.453557	0.898146	0.2	Sample_151:1/1;Sample_1540:1/1;Sample_1799:1/1;Sample_1825:1/1;Sample_185:1/1;Sample_282:0/1;Sample_320:0/1;Sample_421:1/1;Sample_422:1/1;Sample_423:0/1;Sample_424:0/1;Sample_425:0/1;Sample_426:1/1;Sample_427:1/1;Sample_433:1/1;Sample_434:0/1;Sample_435:1/1;Sample_437:1/1;Sample_498:0/1;Sample_504:0/1;Sample_599:1/1;Sample_748:0/1;Sample_831:0/1;Sample_B-8274:1/1;Sample_B-8323:0/1	1	791962	791962	1	T	TTTG	stop_gained&disruptive_inframe_insertion	HIGH	CORT_0A03670	CPAR2_803650	orf19.4829	YKL213C	DOA1,DOA1	c.47_48insTTG	p.Val16_Leu17insTer	48/2514	16/837	character(0)	protein similar to S. cerevisiae Doa1p, which is involved in ubiquitin-mediated protein degradation	isoflurane;resistance to chemicals: decreased;|itraconazole;resistance to chemicals: decreased;|propranolol;resistance to chemicals: decreased;|sodium dodecyl sulfate;resistance to chemicals: decreased;|;viable;|;viable;|;protein activity: decreased;|caffeine;resistance to chemicals: decreased;|butan-1-ol;resistance to chemicals: decreased;|;filamentous growth: abnormal;mixture of pseudohyphae an…	WD40-repeat-containing domain|G-protein beta WD-40 repeat|PUL|WD40 repeat|PLAA family ubiquitin binding, PFU|NULL|WD40/YVTN repeat-like-containing domain|WD40 repeat, conserved site	Molecular Function: protein binding (GO:0005515)|	TRUE
1_840848_GCT_G	0.120386	0.0932505	0.368605	0	0	0.466252	0.662122	0.208514	0.208514	0.724462	0.361158	0	0	0.377217	0.782609	0.147442	0.417029	0.417029	0.208514	0.472866	0.893819	0.208514	Sample_151:1/1;Sample_1540:1/1;Sample_1825:1/1;Sample_185:1/1;Sample_282:0/1;Sample_320:0/1;Sample_421:1/1;Sample_422:1/1;Sample_424:0/1;Sample_425:1/1;Sample_426:1/1;Sample_427:1/1;Sample_433:1/1;Sample_435:1/1;Sample_436:1/1;Sample_437:1/1;Sample_498:0/1;Sample_504:1/1;Sample_599:1/1;Sample_748:0/1;Sample_831:1/1;Sample_B-8274:1/1;Sample_B-8323:1/1	1	840848	840850	3	GCT	G	frameshift_variant	HIGH	CORT_0A03850	CPAR2_803830	orf19.177	---		c.1812_1813delCT	p.Phe605fs	1812/2157	604/718	(CORT_0A03850|CORT_0A03850|1|1.00)	hypothetical protein	NA	Phox homologous domain|Src homology-3 domain|NULL	Molecular Function: protein binding (GO:0005515), Biological Process: cell communication (GO:0007154), Molecular Function: phosphatidylinositol binding (GO:0035091)|Molecular Function: protein binding (GO:0005515)|	TRUE
1_840852_C_CCT	0.120386	0.0932505	0.368605	0	0	0.466252	0.662122	0.208514	0.208514	0.724462	0.361158	0	0	0.377217	0.782609	0.147442	0.417029	0.417029	0.208514	0.472866	0.893819	0.208514	Sample_151:1/1;Sample_1540:1/1;Sample_1825:1/1;Sample_185:1/1;Sample_282:0/1;Sample_320:0/1;Sample_421:1/1;Sample_422:1/1;Sample_424:0/1;Sample_425:1/1;Sample_426:1/1;Sample_427:1/1;Sample_433:1/1;Sample_435:1/1;Sample_436:1/1;Sample_437:1/1;Sample_498:0/1;Sample_504:1/1;Sample_599:1/1;Sample_748:0/1;Sample_831:1/1;Sample_B-8274:1/1;Sample_B-8323:1/1	1	840852	840852	1	C	CCT	frameshift_variant	HIGH	CORT_0A03850	CPAR2_803830	orf19.177	---		c.1815_1816insCT	p.Asn606fs	1816/2157	606/718	(CORT_0A03850|CORT_0A03850|1|1.00)	hypothetical protein	NA	Phox homologous domain|Src homology-3 domain|NULL	Molecular Function: protein binding (GO:0005515), Biological Process: cell communication (GO:0007154), Molecular Function: phosphatidylinositol binding (GO:0035091)|Molecular Function: protein binding (GO:0005515)|	TRUE
1_852805_T_C	0.333333	0.430331	0.544331	0.19245	0.19245	0.430331	0.611111	0.19245	0.19245	0.668648	0.333333	0.272166	0.333333	0.580259	0.88283	0.136083	0.3849	0.3849	0.19245	0.509175	0.942809	0.19245	Sample_151:1/1;Sample_1540:1/1;Sample_1799:1/1;Sample_1825:1/1;Sample_185:1/1;Sample_282:0/1;Sample_320:0/1;Sample_421:1/1;Sample_422:1/1;Sample_423:1/1;Sample_424:0/1;Sample_425:1/1;Sample_426:1/1;Sample_427:1/1;Sample_428:1/1;Sample_433:1/1;Sample_434:1/1;Sample_435:1/1;Sample_436:1/1;Sample_437:1/1;Sample_498:1/1;Sample_504:1/1;Sample_599:1/1;Sample_748:0/1;Sample_831:1/1;Sample_B-8274:1/1;Sam…	1	852805	852805	1	T	C	stop_lost&splice_region_variant	HIGH	CORT_0A03880	CPAR2_803860	orf19.6277	---		c.2428T>C	p.Ter810Glnext*?	2428/2430	810/809	character(0)	hypothetical protein	NA	Src homology-3 domain|NULL	Molecular Function: protein binding (GO:0005515)|	FALSE
1_864067_G_GAT	0.226455	0.350823	0.485363	0.196116	0.196116	0.438529	0.622752	0.196116	0.196116	0.681385	0.339683	0.138675	0.226455	0.532181	0.858754	0.138675	0.392232	0.392232	0.196116	0.518875	0.920737	0.196116	Sample_151:1/1;Sample_1540:1/1;Sample_1799:1/1;Sample_1825:1/1;Sample_185:1/1;Sample_282:0/1;Sample_320:0/1;Sample_421:1/1;Sample_422:1/1;Sample_423:1/1;Sample_424:0/1;Sample_425:0/1;Sample_426:0/1;Sample_427:0/1;Sample_433:1/1;Sample_434:1/1;Sample_435:0/1;Sample_436:0/1;Sample_437:1/1;Sample_498:0/1;Sample_504:0/1;Sample_599:1/1;Sample_748:0/1;Sample_831:0/1;Sample_B-8274:1/1;Sample_B-8323:0/1	1	864067	864067	1	G	GAT	frameshift_variant	HIGH	CORT_0A03930	CPAR2_803900	orf19.4761	YOL068C	HST1,HST1	c.1827_1828insAT	p.Ser610fs	1828/1935	610/644	(CORT_0A03930|CORT_0A03930|1|1.00)	putative histone deacetylase, involved in regulation of white-opaque switching	;viable;|;phenotypic switching: decreased;opaque-to-white switching	NAD-dependent histone deacetylase Sir2, N-terminal|NULL|Sirtuin family|Sirtuin family, catalytic core domain|Sirtuin family, catalytic core small domain	Biological Process: chromatin silencing (GO:0006342), Biological Process: regulation of transcription, DNA-dependent (GO:0006355), Biological Process: protein deacetylation (GO:0006476), Molecular Function: zinc ion binding (GO:0008270), Molecular Function: hydrolase activity, acting on carbon-nitrogen (but not peptide) bonds, in linear amides (GO:0016811), Molecular Function: NAD-dependent histo…	TRUE
1_864068_TCC_T	0.226455	0.350823	0.485363	0.196116	0.196116	0.438529	0.622752	0.196116	0.196116	0.681385	0.339683	0.138675	0.226455	0.532181	0.858754	0.138675	0.392232	0.392232	0.196116	0.518875	0.920737	0.196116	Sample_151:1/1;Sample_1540:1/1;Sample_1799:1/1;Sample_1825:1/1;Sample_185:1/1;Sample_282:0/1;Sample_320:0/1;Sample_421:1/1;Sample_422:1/1;Sample_423:1/1;Sample_424:0/1;Sample_425:0/1;Sample_426:0/1;Sample_427:0/1;Sample_433:1/1;Sample_434:1/1;Sample_435:0/1;Sample_436:0/1;Sample_437:1/1;Sample_498:0/1;Sample_504:0/1;Sample_599:1/1;Sample_748:0/1;Sample_831:0/1;Sample_B-8274:1/1;Sample_B-8323:0/1	1	864068	864070	3	TCC	T	frameshift_variant	HIGH	CORT_0A03930	CPAR2_803900	orf19.4761	YOL068C	HST1,HST1	c.1830_1831delCC	p.Arg611fs	1830/1935	610/644	(CORT_0A03930|CORT_0A03930|1|1.00)	putative histone deacetylase, involved in regulation of white-opaque switching	;viable;|;phenotypic switching: decreased;opaque-to-white switching	NAD-dependent histone deacetylase Sir2, N-terminal|NULL|Sirtuin family|Sirtuin family, catalytic core domain|Sirtuin family, catalytic core small domain	Biological Process: chromatin silencing (GO:0006342), Biological Process: regulation of transcription, DNA-dependent (GO:0006355), Biological Process: protein deacetylation (GO:0006476), Molecular Function: zinc ion binding (GO:0008270), Molecular Function: hydrolase activity, acting on carbon-nitrogen (but not peptide) bonds, in linear amides (GO:0016811), Molecular Function: NAD-dependent histo…	TRUE
1_865763_C_T	0.226455	0.350823	0.485363	0.196116	0.196116	0.438529	0.622752	0.196116	0.196116	0.681385	0.339683	0.138675	0.226455	0.532181	0.858754	0.138675	0.392232	0.392232	0.196116	0.518875	0.920737	0.196116	Sample_151:1/1;Sample_1540:1/1;Sample_1799:1/1;Sample_1825:1/1;Sample_185:1/1;Sample_282:0/1;Sample_320:0/1;Sample_421:1/1;Sample_422:1/1;Sample_423:1/1;Sample_424:0/1;Sample_425:0/1;Sample_426:0/1;Sample_427:0/1;Sample_433:1/1;Sample_434:1/1;Sample_435:0/1;Sample_436:0/1;Sample_437:1/1;Sample_498:0/1;Sample_504:0/1;Sample_599:1/1;Sample_748:0/1;Sample_831:0/1;Sample_B-8274:1/1;Sample_B-8323:0/1	1	865763	865763	1	C	T	stop_gained	HIGH	CORT_0A03940	CPAR2_803910	orf19.4721	YDL044C	,MTF2	c.1324C>T	p.Gln442*	1324/1332	442/443	character(0)	hypothetical protein	NA	NULL		FALSE
1_874231_AG_A	0.235702	0.365148	0.505181	0.204124	0.204124	0.456435	0.648181	0.204124	0.204124	0.709208	0.353553	0.144338	0.235702	0.553912	0.808694	0.144338	0.408248	0.408248	0.204124	0.540062	0.875	0.204124	Sample_151:1/1;Sample_1540:1/1;Sample_1799:1/1;Sample_1825:1/1;Sample_185:1/1;Sample_421:1/1;Sample_422:1/1;Sample_423:1/1;Sample_424:0/1;Sample_425:0/1;Sample_426:0/1;Sample_427:0/1;Sample_433:1/1;Sample_434:1/1;Sample_435:0/1;Sample_436:1/1;Sample_437:1/1;Sample_498:0/1;Sample_504:1/1;Sample_599:1/1;Sample_748:0/1;Sample_831:1/1;Sample_B-8274:1/1;Sample_B-8323:0/1	1	874231	874232	2	AG	A	frameshift_variant	HIGH	CORT_0A04010	CPAR2_803980	orf19.5275	YLR181C	,VTA1	c.1255delG	p.Glu419fs	1255/1266	419/421	character(0)	S. cerevisiae homolog VTA1 has ATPase activator activity and has role in positive regulation of protein oligomerization, late endosome to vacuole transport via multivesicular body sorting pathway	NA	NULL|Vacuolar protein sorting-associate Vta1, N-terminal		TRUE
1_874233_AAG_A	0.235702	0.365148	0.505181	0.204124	0.204124	0.456435	0.648181	0.204124	0.204124	0.709208	0.353553	0.144338	0.235702	0.553912	0.808694	0.144338	0.408248	0.408248	0.204124	0.540062	0.875	0.204124	Sample_151:1/1;Sample_1540:1/1;Sample_1799:1/1;Sample_1825:1/1;Sample_185:1/1;Sample_421:1/1;Sample_422:1/1;Sample_423:1/1;Sample_424:0/1;Sample_425:0/1;Sample_426:0/1;Sample_427:0/1;Sample_433:1/1;Sample_434:1/1;Sample_435:0/1;Sample_436:1/1;Sample_437:1/1;Sample_498:0/1;Sample_504:1/1;Sample_599:1/1;Sample_748:0/1;Sample_831:1/1;Sample_B-8274:1/1;Sample_B-8323:0/1	1	874233	874235	3	AAG	A	frameshift_variant	HIGH	CORT_0A04010	CPAR2_803980	orf19.5275	YLR181C	,VTA1	c.1258_1259delGA	p.Glu420fs	1258/1266	420/421	character(0)	S. cerevisiae homolog VTA1 has ATPase activator activity and has role in positive regulation of protein oligomerization, late endosome to vacuole transport via multivesicular body sorting pathway	NA	NULL|Vacuolar protein sorting-associate Vta1, N-terminal		TRUE
1_874241_TAAA_T	0.235702	0.365148	0.505181	0.204124	0.204124	0.456435	0.648181	0.204124	0.204124	0.709208	0.353553	0.144338	0.235702	0.553912	0.808694	0.144338	0.408248	0.408248	0.204124	0.540062	0.875	0.204124	Sample_151:1/1;Sample_1540:1/1;Sample_1799:1/1;Sample_1825:1/1;Sample_185:1/1;Sample_421:1/1;Sample_422:1/1;Sample_423:1/1;Sample_424:0/1;Sample_425:0/1;Sample_426:0/1;Sample_427:0/1;Sample_433:1/1;Sample_434:1/1;Sample_435:0/1;Sample_436:1/1;Sample_437:1/1;Sample_498:0/1;Sample_504:1/1;Sample_599:1/1;Sample_748:0/1;Sample_831:1/1;Sample_B-8274:1/1;Sample_B-8323:0/1	1	874241	874244	4	TAAA	T	frameshift_variant&stop_lost&splice_region_variant	HIGH	CORT_0A04010	CPAR2_803980	orf19.5275	YLR181C	,VTA1	c.1265_*1delAAA	p.Ter422fs	1265/1266	422/421	character(0)	S. cerevisiae homolog VTA1 has ATPase activator activity and has role in positive regulation of protein oligomerization, late endosome to vacuole transport via multivesicular body sorting pathway	NA	NULL|Vacuolar protein sorting-associate Vta1, N-terminal		TRUE
1_903987_GGA_G	0.235702	0.365148	0.505181	0.204124	0.204124	0.456435	0.648181	0.204124	0.204124	0.709208	0.353553	0.144338	0.235702	0.553912	0.808694	0.144338	0.408248	0.408248	0.204124	0.540062	0.875	0.204124	Sample_151:1/1;Sample_1540:1/1;Sample_1799:1/1;Sample_1825:1/1;Sample_185:1/1;Sample_421:1/1;Sample_422:1/1;Sample_423:1/1;Sample_424:0/1;Sample_425:0/1;Sample_426:0/1;Sample_427:0/1;Sample_433:1/1;Sample_434:1/1;Sample_435:0/1;Sample_436:0/1;Sample_437:1/1;Sample_498:0/1;Sample_504:0/1;Sample_599:1/1;Sample_748:0/1;Sample_831:0/1;Sample_B-8274:1/1;Sample_B-8323:0/1	1	903987	903989	3	GGA	G	frameshift_variant	HIGH	CORT_0A04160	CPAR2_804390	orf19.5074	YDR390C	UBA2,UBA2	c.56_57delGA	p.Gly19fs	56/1812	19/603	character(0)	S. cerevisiae homolog UBA2 has SUMO activating enzyme activity, has role in protein sumoylation and localizes to SUMO activating enzyme complex	;viable;	NAD(P)-binding domain|NULL|Ubiquitin-activating enzyme, E1, active site|Molybdenum cofactor biosynthesis, MoeB|UBA/THIF-type NAD/FAD binding fold|Ubiquitin-activating enzyme|Ubiquitin-activating enzyme repeat|Ubiquitin-like 1 activating enzyme, catalytic cysteine domain	Molecular Function: nucleotide binding (GO:0000166)||Molecular Function: catalytic activity (GO:0003824)|Molecular Function: ATP binding (GO:0005524), Biological Process: cellular protein modification process (GO:0006464), Molecular Function: small protein activating enzyme activity (GO:0008641)	FALSE
1_909076_C_CG	0.23094	0.268328	0.424264	0.2	0.2	0.447214	0.635085	0.2	0.2	0.694879	0.34641	0.141421	0.23094	0.54272	0.834058	0.141421	0.4	0.4	0.2	0.52915	0.898146	0.2	Sample_151:1/1;Sample_1540:1/1;Sample_1799:1/1;Sample_1825:1/1;Sample_185:1/1;Sample_282:0/1;Sample_320:0/1;Sample_421:1/1;Sample_422:1/1;Sample_423:1/1;Sample_424:0/1;Sample_425:0/1;Sample_427:0/1;Sample_433:1/1;Sample_434:1/1;Sample_435:0/1;Sample_436:0/1;Sample_437:1/1;Sample_498:0/1;Sample_504:0/1;Sample_599:1/1;Sample_748:0/1;Sample_831:0/1;Sample_B-8274:1/1;Sample_B-8323:0/1	1	909076	909076	1	C	CG	frameshift_variant	HIGH	CORT_0A04180	CPAR2_804410	orf19.4905	---		c.91dupC	p.Arg31fs	91/1545	31/514	(CORT_0A04180|CORT_0A04180|1|1.00)	hypothetical protein	;viable;|;competitive fitness: decreased;R\I score is the median log2(R/I) value representing abundance of the mutant in recovered pool relative to inoculum|;colony appearance: normal;Morphology (M) score represents relative sizes of central and peripheral regions of colony|;vegetative growth: normal rate;|;viable;	Major facilitator superfamily|Major facilitator superfamily domain|NULL|Major facilitator superfamily domain, general substrate transporter	Cellular Component: integral to membrane (GO:0016021), Biological Process: transmembrane transport (GO:0055085)|	FALSE
1_927186_T_TTG	0.120386	0.0932505	0.368605	0	0	0.466252	0.662122	0.208514	0.208514	0.724462	0.361158	0	0	0.377217	0.782609	0.147442	0.417029	0.417029	0.208514	0.472866	0.893819	0.208514	Sample_151:1/1;Sample_1540:1/1;Sample_1825:1/1;Sample_185:1/1;Sample_282:0/1;Sample_320:0/1;Sample_421:0/1;Sample_422:1/1;Sample_424:0/1;Sample_425:0/1;Sample_426:0/1;Sample_427:0/1;Sample_433:1/1;Sample_435:0/1;Sample_436:0/1;Sample_437:0/1;Sample_498:0/1;Sample_504:0/1;Sample_599:0/1;Sample_748:0/1;Sample_831:0/1;Sample_B-8274:1/1;Sample_B-8323:0/1	1	927186	927186	1	T	TTG	frameshift_variant	HIGH	CORT_0A04310	CPAR2_804430	---	---		c.1563_1564insCA	p.Met522fs	1563/1869	521/622	(CORT_0A04310|CORT_0A04310|1|1.00)	hypothetical protein	NA	NULL|Proton-dependent oligopeptide transporter family|PTR2 family proton/oligopeptide symporter, conserved site|Major facilitator superfamily domain, general substrate transporter	|Molecular Function: transporter activity (GO:0005215), Biological Process: transport (GO:0006810), Cellular Component: membrane (GO:0016020)|Molecular Function: transporter activity (GO:0005215), Biological Process: oligopeptide transport (GO:0006857), Cellular Component: membrane (GO:0016020)	TRUE
1_927188_GAA_G	0.120386	0.0932505	0.368605	0	0	0.466252	0.662122	0.208514	0.208514	0.724462	0.361158	0	0	0.377217	0.782609	0.147442	0.417029	0.417029	0.208514	0.472866	0.893819	0.208514	Sample_151:1/1;Sample_1540:0/1;Sample_1825:1/1;Sample_185:0/1;Sample_282:0/1;Sample_320:0/1;Sample_421:0/1;Sample_422:0/1;Sample_424:0/1;Sample_425:0/1;Sample_426:0/1;Sample_427:0/1;Sample_433:1/1;Sample_435:0/1;Sample_436:0/1;Sample_437:0/1;Sample_498:0/1;Sample_504:0/1;Sample_599:0/1;Sample_748:0/1;Sample_831:0/1;Sample_B-8274:0/1;Sample_B-8323:0/1	1	927188	927190	3	GAA	G	frameshift_variant	HIGH	CORT_0A04310	CPAR2_804430	---	---		c.1560_1561delTT	p.Ser521fs	1561/1869	520/622	(CORT_0A04310|CORT_0A04310|1|1.00)	hypothetical protein	NA	NULL|Proton-dependent oligopeptide transporter family|PTR2 family proton/oligopeptide symporter, conserved site|Major facilitator superfamily domain, general substrate transporter	|Molecular Function: transporter activity (GO:0005215), Biological Process: transport (GO:0006810), Cellular Component: membrane (GO:0016020)|Molecular Function: transporter activity (GO:0005215), Biological Process: oligopeptide transport (GO:0006857), Cellular Component: membrane (GO:0016020)	TRUE
1_927417_G_A	0.369274	0.381385	0.527645	0.213201	0.213201	0.286039	0.492366	0.213201	0	0.569803	0.369274	0.301511	0.369274	0.514259	0.755742	0.150756	0.426401	0.426401	0.213201	0.564076	0.913908	0.213201	Sample_151:0/1;Sample_1540:0/1;Sample_1799:0/1;Sample_1825:0/1;Sample_185:0/1;Sample_282:0/1;Sample_320:0/1;Sample_421:0/1;Sample_422:0/1;Sample_423:0/1;Sample_425:0/1;Sample_428:0/1;Sample_433:0/1;Sample_434:0/1;Sample_436:0/1;Sample_437:0/1;Sample_498:0/1;Sample_504:0/1;Sample_599:0/1;Sample_831:0/1;Sample_B-8274:0/1;Sample_B-8323:0/1	1	927417	927417	1	G	A	stop_gained	HIGH	CORT_0A04310	CPAR2_804430	---	---		c.1333C>T	p.Gln445*	1333/1869	445/622	character(0)	hypothetical protein	NA	NULL|Proton-dependent oligopeptide transporter family|PTR2 family proton/oligopeptide symporter, conserved site|Major facilitator superfamily domain, general substrate transporter	|Molecular Function: transporter activity (GO:0005215), Biological Process: transport (GO:0006810), Cellular Component: membrane (GO:0016020)|Molecular Function: transporter activity (GO:0005215), Biological Process: oligopeptide transport (GO:0006857), Cellular Component: membrane (GO:0016020)	TRUE
1_927425_CT_C	0.369274	0.381385	0.527645	0.213201	0.213201	0.286039	0.492366	0.213201	0	0.569803	0.369274	0.301511	0.369274	0.514259	0.755742	0.150756	0.426401	0.426401	0.213201	0.564076	0.913908	0.213201	Sample_151:0/1;Sample_1540:0/1;Sample_1799:0/1;Sample_1825:0/1;Sample_185:0/1;Sample_282:0/1;Sample_320:0/1;Sample_421:0/1;Sample_422:0/1;Sample_423:0/1;Sample_425:0/1;Sample_428:0/1;Sample_433:0/1;Sample_434:0/1;Sample_436:0/1;Sample_437:0/1;Sample_498:0/1;Sample_504:0/1;Sample_599:0/1;Sample_831:0/1;Sample_B-8274:0/1;Sample_B-8323:0/1	1	927425	927426	2	CT	C	frameshift_variant	HIGH	CORT_0A04310	CPAR2_804430	---	---		c.1324delA	p.Arg442fs	1324/1869	442/622	(CORT_0A04310|CORT_0A04310|1|1.00)	hypothetical protein	NA	NULL|Proton-dependent oligopeptide transporter family|PTR2 family proton/oligopeptide symporter, conserved site|Major facilitator superfamily domain, general substrate transporter	|Molecular Function: transporter activity (GO:0005215), Biological Process: transport (GO:0006810), Cellular Component: membrane (GO:0016020)|Molecular Function: transporter activity (GO:0005215), Biological Process: oligopeptide transport (GO:0006857), Cellular Component: membrane (GO:0016020)	TRUE
1_927430_A_AG	0.369274	0.381385	0.527645	0.213201	0.213201	0.286039	0.492366	0.213201	0	0.569803	0.369274	0.301511	0.369274	0.514259	0.755742	0.150756	0.426401	0.426401	0.213201	0.564076	0.913908	0.213201	Sample_151:0/1;Sample_1540:0/1;Sample_1799:0/1;Sample_1825:0/1;Sample_185:0/1;Sample_282:0/1;Sample_320:0/1;Sample_421:0/1;Sample_422:0/1;Sample_423:0/1;Sample_425:0/1;Sample_428:0/1;Sample_433:0/1;Sample_434:0/1;Sample_436:0/1;Sample_437:0/1;Sample_498:0/1;Sample_504:0/1;Sample_599:0/1;Sample_831:0/1;Sample_B-8274:0/1;Sample_B-8323:0/1	1	927430	927430	1	A	AG	frameshift_variant	HIGH	CORT_0A04310	CPAR2_804430	---	---		c.1319_1320insC	p.Arg442fs	1319/1869	440/622	(CORT_0A04310|CORT_0A04310|1|1.00)	hypothetical protein	NA	NULL|Proton-dependent oligopeptide transporter family|PTR2 family proton/oligopeptide symporter, conserved site|Major facilitator superfamily domain, general substrate transporter	|Molecular Function: transporter activity (GO:0005215), Biological Process: transport (GO:0006810), Cellular Component: membrane (GO:0016020)|Molecular Function: transporter activity (GO:0005215), Biological Process: oligopeptide transport (GO:0006857), Cellular Component: membrane (GO:0016020)	TRUE
1_927566_GTTTC_G	0.251976	0.29277	0.46291	0.218218	0.218218	0.29277	0.503953	0.218218	0	0.583212	0.377964	0.154303	0.251976	0.460566	0.728025	0.154303	0.436436	0.436436	0.218218	0.57735	0.890871	0.218218	Sample_151:0/1;Sample_1540:0/1;Sample_1799:0/1;Sample_1825:0/1;Sample_185:0/1;Sample_282:0/1;Sample_320:0/1;Sample_421:0/1;Sample_422:0/1;Sample_423:0/1;Sample_425:0/1;Sample_433:0/1;Sample_434:0/1;Sample_436:0/1;Sample_437:0/1;Sample_498:0/1;Sample_504:0/1;Sample_599:0/1;Sample_831:0/1;Sample_B-8274:0/1;Sample_B-8323:0/1	1	927566	927570	5	GTTTC	G	frameshift_variant	HIGH	CORT_0A04310	CPAR2_804430	---	---		c.1180_1183delGAAA	p.Glu394fs	1183/1869	394/622	(CORT_0A04310|CORT_0A04310|1|1.00)	hypothetical protein	NA	NULL|Proton-dependent oligopeptide transporter family|PTR2 family proton/oligopeptide symporter, conserved site|Major facilitator superfamily domain, general substrate transporter	|Molecular Function: transporter activity (GO:0005215), Biological Process: transport (GO:0006810), Cellular Component: membrane (GO:0016020)|Molecular Function: transporter activity (GO:0005215), Biological Process: oligopeptide transport (GO:0006857), Cellular Component: membrane (GO:0016020)	TRUE
1_927574_TG_T	0.251976	0.29277	0.46291	0.218218	0.218218	0.29277	0.503953	0.218218	0	0.583212	0.377964	0.154303	0.251976	0.460566	0.728025	0.154303	0.436436	0.436436	0.218218	0.57735	0.890871	0.218218	Sample_151:0/1;Sample_1540:0/1;Sample_1799:0/1;Sample_1825:0/1;Sample_185:0/1;Sample_282:0/1;Sample_320:0/1;Sample_421:0/1;Sample_422:0/1;Sample_423:0/1;Sample_425:0/1;Sample_433:0/1;Sample_434:0/1;Sample_436:0/1;Sample_437:0/1;Sample_498:0/1;Sample_504:0/1;Sample_599:0/1;Sample_831:0/1;Sample_B-8274:0/1;Sample_B-8323:0/1	1	927574	927575	2	TG	T	frameshift_variant	HIGH	CORT_0A04310	CPAR2_804430	---	---		c.1175delC	p.Ser392fs	1175/1869	392/622	(CORT_0A04310|CORT_0A04310|1|1.00)	hypothetical protein	NA	NULL|Proton-dependent oligopeptide transporter family|PTR2 family proton/oligopeptide symporter, conserved site|Major facilitator superfamily domain, general substrate transporter	|Molecular Function: transporter activity (GO:0005215), Biological Process: transport (GO:0006810), Cellular Component: membrane (GO:0016020)|Molecular Function: transporter activity (GO:0005215), Biological Process: oligopeptide transport (GO:0006857), Cellular Component: membrane (GO:0016020)	TRUE
1_927584_CCACT_C	0.251976	0.29277	0.46291	0.218218	0.218218	0.29277	0.503953	0.218218	0	0.583212	0.377964	0.154303	0.251976	0.460566	0.728025	0.154303	0.436436	0.436436	0.218218	0.57735	0.890871	0.218218	Sample_151:0/1;Sample_1540:0/1;Sample_1799:0/1;Sample_1825:0/1;Sample_185:0/1;Sample_282:0/1;Sample_320:0/1;Sample_421:0/1;Sample_422:0/1;Sample_423:0/1;Sample_425:0/1;Sample_433:0/1;Sample_434:0/1;Sample_436:0/1;Sample_437:0/1;Sample_498:0/1;Sample_504:0/1;Sample_599:0/1;Sample_831:0/1;Sample_B-8274:0/1;Sample_B-8323:0/1	1	927584	927588	5	CCACT	C	frameshift_variant	HIGH	CORT_0A04310	CPAR2_804430	---	---		c.1162_1165delAGTG	p.Ser388fs	1165/1869	388/622	(CORT_0A04310|CORT_0A04310|1|1.00)	hypothetical protein	NA	NULL|Proton-dependent oligopeptide transporter family|PTR2 family proton/oligopeptide symporter, conserved site|Major facilitator superfamily domain, general substrate transporter	|Molecular Function: transporter activity (GO:0005215), Biological Process: transport (GO:0006810), Cellular Component: membrane (GO:0016020)|Molecular Function: transporter activity (GO:0005215), Biological Process: oligopeptide transport (GO:0006857), Cellular Component: membrane (GO:0016020)	TRUE
1_927608_A_ATGTAG	0.251976	0.29277	0.46291	0.218218	0.218218	0.29277	0.503953	0.218218	0	0.583212	0.377964	0.154303	0.251976	0.460566	0.728025	0.154303	0.436436	0.436436	0.218218	0.57735	0.890871	0.218218	Sample_151:0/1;Sample_1540:0/1;Sample_1799:0/1;Sample_1825:0/1;Sample_185:0/1;Sample_282:0/1;Sample_320:0/1;Sample_421:0/1;Sample_422:0/1;Sample_423:0/1;Sample_425:0/1;Sample_433:0/1;Sample_434:0/1;Sample_436:0/1;Sample_437:0/1;Sample_498:0/1;Sample_504:0/1;Sample_599:0/1;Sample_831:0/1;Sample_B-8274:0/1;Sample_B-8323:0/1	1	927608	927608	1	A	ATGTAG	frameshift_variant	HIGH	CORT_0A04310	CPAR2_804430	---	---		c.1141_1142insCTACA	p.Ile381fs	1141/1869	381/622	(CORT_0A04310|CORT_0A04310|1|1.00)	hypothetical protein	NA	NULL|Proton-dependent oligopeptide transporter family|PTR2 family proton/oligopeptide symporter, conserved site|Major facilitator superfamily domain, general substrate transporter	|Molecular Function: transporter activity (GO:0005215), Biological Process: transport (GO:0006810), Cellular Component: membrane (GO:0016020)|Molecular Function: transporter activity (GO:0005215), Biological Process: oligopeptide transport (GO:0006857), Cellular Component: membrane (GO:0016020)	TRUE
1_927617_ATG_A	0.251976	0.29277	0.46291	0.218218	0.218218	0.29277	0.503953	0.218218	0	0.583212	0.377964	0.154303	0.251976	0.460566	0.728025	0.154303	0.436436	0.436436	0.218218	0.57735	0.890871	0.218218	Sample_151:0/1;Sample_1540:0/1;Sample_1799:0/1;Sample_1825:0/1;Sample_185:0/1;Sample_282:0/1;Sample_320:0/1;Sample_421:0/1;Sample_422:0/1;Sample_423:0/1;Sample_425:0/1;Sample_433:0/1;Sample_434:0/1;Sample_436:0/1;Sample_437:0/1;Sample_498:0/1;Sample_504:0/1;Sample_599:0/1;Sample_831:0/1;Sample_B-8274:0/1;Sample_B-8323:0/1	1	927617	927619	3	ATG	A	frameshift_variant	HIGH	CORT_0A04310	CPAR2_804430	---	---		c.1131_1132delCA	p.Ile378fs	1132/1869	377/622	(CORT_0A04310|CORT_0A04310|1|1.00)	hypothetical protein	NA	NULL|Proton-dependent oligopeptide transporter family|PTR2 family proton/oligopeptide symporter, conserved site|Major facilitator superfamily domain, general substrate transporter	|Molecular Function: transporter activity (GO:0005215), Biological Process: transport (GO:0006810), Cellular Component: membrane (GO:0016020)|Molecular Function: transporter activity (GO:0005215), Biological Process: oligopeptide transport (GO:0006857), Cellular Component: membrane (GO:0016020)	TRUE
1_927681_T_TA	0.235702	0.365148	0.505181	0.204124	0.204124	0.365148	0.53033	0.204124	0.204124	0.654654	0.353553	0.144338	0.235702	0.492366	0.808694	0.144338	0.408248	0.408248	0.204124	0.540062	0.875	0.204124	Sample_151:1/1;Sample_1540:1/1;Sample_1799:1/1;Sample_1825:1/1;Sample_185:1/1;Sample_282:1/1;Sample_320:1/1;Sample_421:1/1;Sample_422:1/1;Sample_423:1/1;Sample_425:0/1;Sample_426:0/1;Sample_427:0/1;Sample_433:1/1;Sample_434:1/1;Sample_435:0/1;Sample_436:0/1;Sample_437:1/1;Sample_498:0/1;Sample_504:0/1;Sample_599:1/1;Sample_831:0/1;Sample_B-8274:1/1;Sample_B-8323:0/1	1	927681	927681	1	T	TA	frameshift_variant	HIGH	CORT_0A04310	CPAR2_804430	---	---		c.1068_1069insT	p.Ile357fs	1068/1869	356/622	(CORT_0A04310|CORT_0A04310|1|1.00)	hypothetical protein	NA	NULL|Proton-dependent oligopeptide transporter family|PTR2 family proton/oligopeptide symporter, conserved site|Major facilitator superfamily domain, general substrate transporter	|Molecular Function: transporter activity (GO:0005215), Biological Process: transport (GO:0006810), Cellular Component: membrane (GO:0016020)|Molecular Function: transporter activity (GO:0005215), Biological Process: oligopeptide transport (GO:0006857), Cellular Component: membrane (GO:0016020)	TRUE
1_927686_GATCCC_G	0.235702	0.365148	0.505181	0.204124	0.204124	0.365148	0.53033	0.204124	0.204124	0.654654	0.353553	0.144338	0.235702	0.492366	0.808694	0.144338	0.408248	0.408248	0.204124	0.540062	0.875	0.204124	Sample_151:1/1;Sample_1540:1/1;Sample_1799:1/1;Sample_1825:1/1;Sample_185:1/1;Sample_282:1/1;Sample_320:1/1;Sample_421:1/1;Sample_422:1/1;Sample_423:1/1;Sample_425:0/1;Sample_426:0/1;Sample_427:0/1;Sample_433:1/1;Sample_434:1/1;Sample_435:0/1;Sample_436:0/1;Sample_437:1/1;Sample_498:0/1;Sample_504:0/1;Sample_599:1/1;Sample_831:0/1;Sample_B-8274:1/1;Sample_B-8323:0/1	1	927686	927691	6	GATCCC	G	frameshift_variant	HIGH	CORT_0A04310	CPAR2_804430	---	---		c.1059_1063delGGGAT	p.Lys353fs	1063/1869	353/622	(CORT_0A04310|CORT_0A04310|1|1.00)	hypothetical protein	NA	NULL|Proton-dependent oligopeptide transporter family|PTR2 family proton/oligopeptide symporter, conserved site|Major facilitator superfamily domain, general substrate transporter	|Molecular Function: transporter activity (GO:0005215), Biological Process: transport (GO:0006810), Cellular Component: membrane (GO:0016020)|Molecular Function: transporter activity (GO:0005215), Biological Process: oligopeptide transport (GO:0006857), Cellular Component: membrane (GO:0016020)	TRUE
1_927695_C_CTTGGTAT	0.235702	0.365148	0.505181	0.204124	0.204124	0.365148	0.53033	0.204124	0.204124	0.654654	0.353553	0.144338	0.235702	0.492366	0.808694	0.144338	0.408248	0.408248	0.204124	0.540062	0.875	0.204124	Sample_151:1/1;Sample_1540:1/1;Sample_1799:1/1;Sample_1825:1/1;Sample_185:1/1;Sample_282:1/1;Sample_320:1/1;Sample_421:1/1;Sample_422:1/1;Sample_423:1/1;Sample_425:0/1;Sample_426:0/1;Sample_427:0/1;Sample_433:1/1;Sample_434:1/1;Sample_435:0/1;Sample_436:0/1;Sample_437:1/1;Sample_498:0/1;Sample_504:0/1;Sample_599:1/1;Sample_831:0/1;Sample_B-8274:1/1;Sample_B-8323:0/1	1	927695	927695	1	C	CTTGGTAT	frameshift_variant	HIGH	CORT_0A04310	CPAR2_804430	---	---		c.1054_1055insATACCAA	p.Arg352fs	1054/1869	352/622	(CORT_0A04310|CORT_0A04310|1|1.00)	hypothetical protein	NA	NULL|Proton-dependent oligopeptide transporter family|PTR2 family proton/oligopeptide symporter, conserved site|Major facilitator superfamily domain, general substrate transporter	|Molecular Function: transporter activity (GO:0005215), Biological Process: transport (GO:0006810), Cellular Component: membrane (GO:0016020)|Molecular Function: transporter activity (GO:0005215), Biological Process: oligopeptide transport (GO:0006857), Cellular Component: membrane (GO:0016020)	TRUE
1_928123_GAT_G	0.251976	0.29277	0.46291	0.218218	0.218218	0.29277	0.503953	0.218218	0	0.583212	0.377964	0.154303	0.251976	0.460566	0.728025	0.154303	0.436436	0.436436	0.218218	0.57735	0.890871	0.218218	Sample_151:0/1;Sample_1540:0/1;Sample_1799:0/1;Sample_1825:0/1;Sample_185:0/1;Sample_282:0/1;Sample_320:0/1;Sample_421:0/1;Sample_422:0/1;Sample_423:0/1;Sample_425:0/1;Sample_433:0/1;Sample_434:0/1;Sample_436:0/1;Sample_437:0/1;Sample_498:0/1;Sample_504:0/1;Sample_599:0/1;Sample_831:0/1;Sample_B-8274:0/1;Sample_B-8323:0/1	1	928123	928125	3	GAT	G	frameshift_variant	HIGH	CORT_0A04310	CPAR2_804430	---	---		c.625_626delAT	p.Ile209fs	626/1869	209/622	(CORT_0A04310|CORT_0A04310|1|1.00)	hypothetical protein	NA	NULL|Proton-dependent oligopeptide transporter family|PTR2 family proton/oligopeptide symporter, conserved site|Major facilitator superfamily domain, general substrate transporter	|Molecular Function: transporter activity (GO:0005215), Biological Process: transport (GO:0006810), Cellular Component: membrane (GO:0016020)|Molecular Function: transporter activity (GO:0005215), Biological Process: oligopeptide transport (GO:0006857), Cellular Component: membrane (GO:0016020)	TRUE
1_928129_A_ATAAAT	0.251976	0.29277	0.46291	0.218218	0.218218	0.29277	0.503953	0.218218	0	0.583212	0.377964	0.154303	0.251976	0.460566	0.728025	0.154303	0.436436	0.436436	0.218218	0.57735	0.890871	0.218218	Sample_151:0/1;Sample_1540:0/1;Sample_1799:0/1;Sample_1825:0/1;Sample_185:0/1;Sample_282:0/1;Sample_320:0/1;Sample_421:0/1;Sample_422:0/1;Sample_423:0/1;Sample_425:0/1;Sample_433:0/1;Sample_434:0/1;Sample_436:0/1;Sample_437:0/1;Sample_498:0/1;Sample_504:0/1;Sample_599:0/1;Sample_831:0/1;Sample_B-8274:0/1;Sample_B-8323:0/1	1	928129	928129	1	A	ATAAAT	frameshift_variant	HIGH	CORT_0A04310	CPAR2_804430	---	---		c.620_621insATTTA	p.Lys210fs	620/1869	207/622	(CORT_0A04310|CORT_0A04310|1|1.00)	hypothetical protein	NA	NULL|Proton-dependent oligopeptide transporter family|PTR2 family proton/oligopeptide symporter, conserved site|Major facilitator superfamily domain, general substrate transporter	|Molecular Function: transporter activity (GO:0005215), Biological Process: transport (GO:0006810), Cellular Component: membrane (GO:0016020)|Molecular Function: transporter activity (GO:0005215), Biological Process: oligopeptide transport (GO:0006857), Cellular Component: membrane (GO:0016020)	TRUE
1_928322_A_ACG	0.251976	0.29277	0.46291	0.218218	0.218218	0.29277	0.503953	0.218218	0	0.583212	0.377964	0.154303	0.251976	0.460566	0.728025	0.154303	0.436436	0.436436	0.218218	0.57735	0.890871	0.218218	Sample_151:0/1;Sample_1540:0/1;Sample_1799:0/1;Sample_1825:0/1;Sample_185:0/1;Sample_282:0/1;Sample_320:0/1;Sample_421:0/1;Sample_422:0/1;Sample_423:0/1;Sample_425:0/1;Sample_433:0/1;Sample_434:0/1;Sample_436:0/1;Sample_437:0/1;Sample_498:0/1;Sample_504:0/1;Sample_599:0/1;Sample_831:0/1;Sample_B-8274:0/1;Sample_B-8323:0/1	1	928322	928322	1	A	ACG	frameshift_variant	HIGH	CORT_0A04310	CPAR2_804430	---	---		c.427_428insCG	p.Val143fs	427/1869	143/622	(CORT_0A04310|CORT_0A04310|1|1.00)	hypothetical protein	NA	NULL|Proton-dependent oligopeptide transporter family|PTR2 family proton/oligopeptide symporter, conserved site|Major facilitator superfamily domain, general substrate transporter	|Molecular Function: transporter activity (GO:0005215), Biological Process: transport (GO:0006810), Cellular Component: membrane (GO:0016020)|Molecular Function: transporter activity (GO:0005215), Biological Process: oligopeptide transport (GO:0006857), Cellular Component: membrane (GO:0016020)	TRUE
1_928326_AAG_A	0.251976	0.29277	0.46291	0.218218	0.218218	0.29277	0.503953	0.218218	0	0.583212	0.377964	0.154303	0.251976	0.460566	0.728025	0.154303	0.436436	0.436436	0.218218	0.57735	0.890871	0.218218	Sample_151:0/1;Sample_1540:0/1;Sample_1799:0/1;Sample_1825:0/1;Sample_185:0/1;Sample_282:0/1;Sample_320:0/1;Sample_421:0/1;Sample_422:0/1;Sample_423:0/1;Sample_425:0/1;Sample_433:0/1;Sample_434:0/1;Sample_436:0/1;Sample_437:0/1;Sample_498:0/1;Sample_504:0/1;Sample_599:0/1;Sample_831:0/1;Sample_B-8274:0/1;Sample_B-8323:0/1	1	928326	928328	3	AAG	A	frameshift_variant	HIGH	CORT_0A04310	CPAR2_804430	---	---		c.422_423delCT	p.Ala141fs	423/1869	141/622	(CORT_0A04310|CORT_0A04310|1|1.00)	hypothetical protein	NA	NULL|Proton-dependent oligopeptide transporter family|PTR2 family proton/oligopeptide symporter, conserved site|Major facilitator superfamily domain, general substrate transporter	|Molecular Function: transporter activity (GO:0005215), Biological Process: transport (GO:0006810), Cellular Component: membrane (GO:0016020)|Molecular Function: transporter activity (GO:0005215), Biological Process: oligopeptide transport (GO:0006857), Cellular Component: membrane (GO:0016020)	TRUE
1_932864_A_AT	0.120386	0.0932505	0.368605	0	0	0.466252	0.662122	0.208514	0.208514	0.724462	0.361158	0	0	0.377217	0.782609	0.147442	0.417029	0.417029	0.208514	0.472866	0.893819	0.208514	Sample_151:1/1;Sample_1540:1/1;Sample_1825:1/1;Sample_185:1/1;Sample_282:0/1;Sample_320:0/1;Sample_421:1/1;Sample_422:1/1;Sample_424:0/1;Sample_425:0/1;Sample_426:0/1;Sample_427:0/1;Sample_433:1/1;Sample_435:0/1;Sample_436:0/1;Sample_437:1/1;Sample_498:1/1;Sample_504:0/1;Sample_599:1/1;Sample_748:0/1;Sample_831:0/1;Sample_B-8274:1/1;Sample_B-8323:1/1	1	932864	932864	1	A	AT	frameshift_variant&start_lost	HIGH	CORT_0A04330	CPAR2_804130	orf19.5078	---		c.1dupA	p.Met1fs	1/477	1/158	(CORT_0A04330|CORT_0A04330|1|1.00)	hypothetical protein	NA	NULL|Dimeric alpha-beta barrel		FALSE
1_942379_T_TGA	0.226455	0.350823	0.485363	0.196116	0.196116	0.438529	0.622752	0.196116	0.196116	0.681385	0.339683	0.138675	0.226455	0.532181	0.858754	0.138675	0.392232	0.392232	0.196116	0.518875	0.920737	0.196116	Sample_151:1/1;Sample_1540:1/1;Sample_1799:1/1;Sample_1825:1/1;Sample_185:1/1;Sample_282:0/1;Sample_320:0/1;Sample_421:1/1;Sample_422:1/1;Sample_423:0/1;Sample_424:0/1;Sample_425:0/1;Sample_426:0/1;Sample_427:0/1;Sample_433:1/1;Sample_434:0/1;Sample_435:0/1;Sample_436:0/1;Sample_437:1/1;Sample_498:0/1;Sample_504:0/1;Sample_599:1/1;Sample_748:0/1;Sample_831:0/1;Sample_B-8274:1/1;Sample_B-8323:1/1	1	942379	942379	1	T	TGA	frameshift_variant	HIGH	CORT_0A04380	CPAR2_804300	orf19.4732	YIL109C	SEC24,SEC24	c.106_107insTC	p.Gln36fs	106/2754	36/917	character(0)	protein with a possible role in ER to Golgi transport	;viable;	NULL|Zinc finger, Sec23/Sec24-type|Sec23/Sec24, trunk domain|Sec23/Sec24, helical domain|Gelsolin domain|Sec23/Sec24 beta-sandwich	|Biological Process: intracellular protein transport (GO:0006886), Biological Process: ER to Golgi vesicle-mediated transport (GO:0006888), Molecular Function: zinc ion binding (GO:0008270), Cellular Component: COPII vesicle coat (GO:0030127)|Biological Process: intracellular protein transport (GO:0006886), Biological Process: ER to Golgi vesicle-mediated transport (GO:0006888), Cellular Componen…	TRUE
1_942381_GAT_G	0.226455	0.350823	0.485363	0.196116	0.196116	0.438529	0.622752	0.196116	0.196116	0.681385	0.339683	0.138675	0.226455	0.532181	0.858754	0.138675	0.392232	0.392232	0.196116	0.518875	0.920737	0.196116	Sample_151:1/1;Sample_1540:1/1;Sample_1799:1/1;Sample_1825:1/1;Sample_185:1/1;Sample_282:0/1;Sample_320:0/1;Sample_421:1/1;Sample_422:1/1;Sample_423:0/1;Sample_424:0/1;Sample_425:0/1;Sample_426:0/1;Sample_427:0/1;Sample_433:1/1;Sample_434:0/1;Sample_435:0/1;Sample_436:0/1;Sample_437:1/1;Sample_498:0/1;Sample_504:0/1;Sample_599:1/1;Sample_748:0/1;Sample_831:0/1;Sample_B-8274:1/1;Sample_B-8323:1/1	1	942381	942383	3	GAT	G	frameshift_variant	HIGH	CORT_0A04380	CPAR2_804300	orf19.4732	YIL109C	SEC24,SEC24	c.103_104delAT	p.Ile35fs	104/2754	35/917	character(0)	protein with a possible role in ER to Golgi transport	;viable;	NULL|Zinc finger, Sec23/Sec24-type|Sec23/Sec24, trunk domain|Sec23/Sec24, helical domain|Gelsolin domain|Sec23/Sec24 beta-sandwich	|Biological Process: intracellular protein transport (GO:0006886), Biological Process: ER to Golgi vesicle-mediated transport (GO:0006888), Molecular Function: zinc ion binding (GO:0008270), Cellular Component: COPII vesicle coat (GO:0030127)|Biological Process: intracellular protein transport (GO:0006886), Biological Process: ER to Golgi vesicle-mediated transport (GO:0006888), Cellular Componen…	TRUE
1_985572_G_T	0.23094	0.268328	0.424264	0.2	0.2	0.447214	0.635085	0.2	0.2	0.694879	0.34641	0.141421	0.23094	0.54272	0.834058	0.141421	0.4	0.4	0.2	0.52915	0.898146	0.2	Sample_151:1/1;Sample_1540:1/1;Sample_1799:1/1;Sample_1825:1/1;Sample_185:1/1;Sample_282:0/1;Sample_320:0/1;Sample_421:1/1;Sample_422:1/1;Sample_423:0/1;Sample_424:0/1;Sample_425:1/1;Sample_427:0/1;Sample_433:1/1;Sample_434:1/1;Sample_435:0/1;Sample_436:1/1;Sample_437:1/1;Sample_498:0/1;Sample_504:1/1;Sample_599:1/1;Sample_748:0/1;Sample_831:1/1;Sample_B-8274:1/1;Sample_B-8323:1/1	1	985572	985572	1	G	T	stop_gained	HIGH	CORT_0A04570	CPAR2_804580	orf19.1150	---		c.39C>A	p.Tyr13*	39/1923	13/640	character(0)	hypothetical protein	;viable;|;virulence: decreased;mutants have reduced capacity to damage oral epithelial cells	Protein of unknown function DUF1752, fungi|Zinc finger, GATA-type|NULL|Zinc finger, NHR/GATA-type	|Molecular Function: sequence-specific DNA binding transcription factor activity (GO:0003700), Biological Process: regulation of transcription, DNA-dependent (GO:0006355), Molecular Function: zinc ion binding (GO:0008270), Molecular Function: sequence-specific DNA binding (GO:0043565)|Biological Process: regulation of transcription, DNA-dependent (GO:0006355), Molecular Function: zinc ion binding…	FALSE
1_1001513_C_CATA	0.333333	0.430331	0.544331	0.19245	0.19245	0.430331	0.611111	0.19245	0.19245	0.668648	0.333333	0.272166	0.333333	0.580259	0.88283	0.136083	0.3849	0.3849	0.19245	0.509175	0.942809	0.19245	Sample_151:1/1;Sample_1540:1/1;Sample_1799:1/1;Sample_1825:1/1;Sample_185:1/1;Sample_282:0/1;Sample_320:0/1;Sample_421:1/1;Sample_422:1/1;Sample_423:1/1;Sample_424:0/1;Sample_425:1/1;Sample_426:1/1;Sample_427:1/1;Sample_428:1/1;Sample_433:1/1;Sample_434:1/1;Sample_435:1/1;Sample_436:1/1;Sample_437:1/1;Sample_498:1/1;Sample_504:1/1;Sample_599:1/1;Sample_748:0/1;Sample_831:1/1;Sample_B-8274:1/1;Sam…	1	1001513	1001513	1	C	CATA	start_lost&disruptive_inframe_insertion	HIGH	CORT_0A04640	CPAR2_804630	orf19.4889	YNR055C	HOL1,	c.2_3insTAT		2/1773	1/590	(CORT_0A04640|CORT_0A04640|1|1.00)	predicted membrane transporter, member of the drug:proton antiporter (12 spanner) (DHA1) family, major facilitator superfamily (MFS)	;viable;	NULL|Major facilitator superfamily|Major facilitator superfamily domain, general substrate transporter	|Cellular Component: integral to membrane (GO:0016021), Biological Process: transmembrane transport (GO:0055085)	FALSE
1_1011837_CAT_C	0.240772	0.279751	0.368605	0.208514	0.208514	0.373002	0.541736	0.208514	0.208514	0.613006	0.361158	0.147442	0.240772	0.565825	0.782609	0.147442	0.312772	0.312772	0	0.394055	0.851257	0.208514	Sample_151:1/1;Sample_1540:1/1;Sample_1799:1/1;Sample_1825:1/1;Sample_185:1/1;Sample_282:0/1;Sample_320:0/1;Sample_421:1/1;Sample_422:1/1;Sample_423:0/1;Sample_424:0/1;Sample_427:0/1;Sample_433:1/1;Sample_434:0/1;Sample_435:1/1;Sample_436:0/1;Sample_437:1/1;Sample_498:0/1;Sample_504:0/1;Sample_599:1/1;Sample_748:0/1;Sample_831:0/1;Sample_B-8274:1/1	1	1011837	1011839	3	CAT	C	frameshift_variant	HIGH	CORT_0A04680	CPAR2_804670	orf19.5103	---		c.9_10delTA	p.Tyr3fs	9/1089	3/362	character(0)	hypothetical protein	;viable;	NULL|Histidine phosphatase superfamily, clade-1		FALSE
1_1048421_G_A	0.226455	0.350823	0.485363	0.196116	0.196116	0.438529	0.622752	0.196116	0.196116	0.681385	0.339683	0.138675	0.226455	0.532181	0.858754	0.138675	0.392232	0.392232	0.196116	0.518875	0.920737	0.196116	Sample_151:1/1;Sample_1540:1/1;Sample_1799:1/1;Sample_1825:1/1;Sample_185:1/1;Sample_282:0/1;Sample_320:0/1;Sample_421:1/1;Sample_422:1/1;Sample_423:1/1;Sample_424:0/1;Sample_425:0/1;Sample_426:0/1;Sample_427:1/1;Sample_433:1/1;Sample_434:1/1;Sample_435:1/1;Sample_436:1/1;Sample_437:1/1;Sample_498:0/1;Sample_504:1/1;Sample_599:1/1;Sample_748:0/1;Sample_831:1/1;Sample_B-8274:1/1;Sample_B-8323:0/1	1	1048421	1048421	1	G	A	stop_gained	HIGH	CORT_0A04800	CPAR2_804780	orf19.4887	YBL101C	ECM21,ECM21	c.3892C>T	p.Gln1298*	3892/3897	1298/1298	character(0)	protein similar to S. cerevisiae Ecm21p (possible cell wall role)	;viable;|;viable;	Arrestin C-terminal-like domain		FALSE
1_1049054_TAC_T	0.23094	0.357771	0.424264	0.2	0.2	0.357771	0.57735	0.2	0.2	0.641427	0.34641	0.141421	0.23094	0.54272	0.834058	0.141421	0.3	0.3	0	0.453557	0.898146	0.2	Sample_151:1/1;Sample_1540:1/1;Sample_1799:1/1;Sample_1825:1/1;Sample_185:1/1;Sample_282:0/1;Sample_320:0/1;Sample_421:1/1;Sample_422:1/1;Sample_423:1/1;Sample_424:0/1;Sample_426:0/1;Sample_427:1/1;Sample_433:1/1;Sample_434:1/1;Sample_435:1/1;Sample_436:1/1;Sample_437:1/1;Sample_498:0/1;Sample_504:1/1;Sample_599:1/1;Sample_748:0/1;Sample_831:1/1;Sample_B-8274:1/1;Sample_B-8323:0/1	1	1049054	1049056	3	TAC	T	frameshift_variant	HIGH	CORT_0A04800	CPAR2_804780	orf19.4887	YBL101C	ECM21,ECM21	c.3257_3258delGT	p.Cys1086fs	3258/3897	1086/1298	(CORT_0A04800|CORT_0A04800|1|1.00)	protein similar to S. cerevisiae Ecm21p (possible cell wall role)	;viable;|;viable;	Arrestin C-terminal-like domain		TRUE
1_1049059_G_GTA	0.23094	0.357771	0.424264	0.2	0.2	0.357771	0.57735	0.2	0.2	0.641427	0.34641	0.141421	0.23094	0.54272	0.834058	0.141421	0.3	0.3	0	0.453557	0.898146	0.2	Sample_151:1/1;Sample_1540:1/1;Sample_1799:1/1;Sample_1825:1/1;Sample_185:1/1;Sample_282:0/1;Sample_320:0/1;Sample_421:1/1;Sample_422:1/1;Sample_423:1/1;Sample_424:0/1;Sample_426:0/1;Sample_427:1/1;Sample_433:1/1;Sample_434:1/1;Sample_435:1/1;Sample_436:1/1;Sample_437:1/1;Sample_498:0/1;Sample_504:1/1;Sample_599:1/1;Sample_748:0/1;Sample_831:1/1;Sample_B-8274:1/1;Sample_B-8323:0/1	1	1049059	1049059	1	G	GTA	frameshift_variant	HIGH	CORT_0A04800	CPAR2_804780	orf19.4887	YBL101C	ECM21,ECM21	c.3253_3254insTA	p.Pro1085fs	3253/3897	1085/1298	(CORT_0A04800|CORT_0A04800|1|1.00)	protein similar to S. cerevisiae Ecm21p (possible cell wall role)	;viable;|;viable;	Arrestin C-terminal-like domain		TRUE
1_1052310_C_T	0.226455	0.350823	0.485363	0.196116	0.196116	0.438529	0.622752	0.196116	0.196116	0.681385	0.339683	0.138675	0.226455	0.532181	0.858754	0.138675	0.392232	0.392232	0.196116	0.518875	0.920737	0.196116	Sample_151:1/1;Sample_1540:1/1;Sample_1799:1/1;Sample_1825:1/1;Sample_185:1/1;Sample_282:0/1;Sample_320:0/1;Sample_421:1/1;Sample_422:1/1;Sample_423:1/1;Sample_424:0/1;Sample_425:0/1;Sample_426:1/1;Sample_427:1/1;Sample_433:1/1;Sample_434:1/1;Sample_435:1/1;Sample_436:1/1;Sample_437:1/1;Sample_498:0/1;Sample_504:1/1;Sample_599:1/1;Sample_748:0/1;Sample_831:1/1;Sample_B-8274:1/1;Sample_B-8323:0/1	1	1052310	1052310	1	C	T	start_lost	HIGH	CORT_0A04800	CPAR2_804780	orf19.4887	YBL101C	ECM21,ECM21	c.3G>A	p.Met1?	3897-03-01	1/1298	(CORT_0A04800|CORT_0A04800|1|1.00)	protein similar to S. cerevisiae Ecm21p (possible cell wall role)	;viable;|;viable;	Arrestin C-terminal-like domain		FALSE
1_1092259_CA_C	0.235702	0.273861	0.433013	0.204124	0.204124	0.456435	0.589256	0.204124	0.204124	0.709208	0.353553	0.144338	0.235702	0.553912	0.851257	0.144338	0.408248	0.408248	0.204124	0.540062	0.875	0.204124	Sample_151:1/1;Sample_1540:1/1;Sample_1799:1/1;Sample_1825:1/1;Sample_185:1/1;Sample_282:0/1;Sample_320:0/1;Sample_421:1/1;Sample_422:1/1;Sample_423:1/1;Sample_424:0/1;Sample_425:0/1;Sample_427:0/1;Sample_433:1/1;Sample_434:1/1;Sample_435:0/1;Sample_436:0/1;Sample_437:1/1;Sample_504:0/1;Sample_599:1/1;Sample_748:0/1;Sample_831:0/1;Sample_B-8274:1/1;Sample_B-8323:0/1	1	1092259	1092260	2	CA	C	frameshift_variant	HIGH	CORT_0A05010	CPAR2_804990	orf19.4906	YER167W	BCK2,	c.291delA	p.Leu98fs	291/2820	97/939	(CORT_0A05010|CORT_0A05010|1|1.00)	putative adhesin-like protein	;viable;|;viable;	NULL		TRUE
1_1092261_CTG_C	0.235702	0.273861	0.433013	0.204124	0.204124	0.456435	0.589256	0.204124	0.204124	0.709208	0.353553	0.144338	0.235702	0.553912	0.851257	0.144338	0.408248	0.408248	0.204124	0.540062	0.875	0.204124	Sample_151:1/1;Sample_1540:1/1;Sample_1799:1/1;Sample_1825:1/1;Sample_185:1/1;Sample_282:0/1;Sample_320:0/1;Sample_421:1/1;Sample_422:1/1;Sample_423:1/1;Sample_424:0/1;Sample_425:0/1;Sample_427:0/1;Sample_433:1/1;Sample_434:1/1;Sample_435:0/1;Sample_436:0/1;Sample_437:1/1;Sample_504:0/1;Sample_599:1/1;Sample_748:0/1;Sample_831:0/1;Sample_B-8274:1/1;Sample_B-8323:0/1	1	1092261	1092263	3	CTG	C	frameshift_variant	HIGH	CORT_0A05010	CPAR2_804990	orf19.4906	YER167W	BCK2,	c.294_295delGT	p.Ser99fs	294/2820	98/939	(CORT_0A05010|CORT_0A05010|1|1.00)	putative adhesin-like protein	;viable;|;viable;	NULL		TRUE
1_1160548_A_T	0.327327	0.422577	0.534522	0.188982	0.188982	0.422577	0.654654	0.188982	0.188982	0.707107	0.327327	0.267261	0.327327	0.626783	0.906327	0.267261	0.377964	0.377964	0.188982	0.5	0.92582	0.188982	Sample_151:1/1;Sample_1540:1/1;Sample_1799:1/1;Sample_1825:1/1;Sample_185:1/1;Sample_282:1/1;Sample_320:1/1;Sample_421:1/1;Sample_422:1/1;Sample_423:1/1;Sample_424:1/1;Sample_425:1/1;Sample_426:1/1;Sample_427:1/1;Sample_428:1/1;Sample_433:1/1;Sample_434:1/1;Sample_435:1/1;Sample_436:1/1;Sample_437:1/1;Sample_498:1/1;Sample_504:1/1;Sample_599:1/1;Sample_748:1/1;Sample_831:1/1;Sample_B-8274:1/1;Sam…	1	1160548	1160548	1	A	T	stop_lost&splice_region_variant	HIGH	CORT_0A05290	CPAR2_301640	orf19.4779	YKR105C	VBA5,	c.1765T>A	p.Ter589Lysext*?	1765/1767	589/588	character(0)	putative transporter	;viable;	Major facilitator superfamily|Major facilitator superfamily domain|NULL|Major facilitator superfamily domain, general substrate transporter	Cellular Component: integral to membrane (GO:0016021), Biological Process: transmembrane transport (GO:0055085)|	FALSE
1_1195212_TG_T	0.226455	0.350823	0.485363	0.196116	0.196116	0.438529	0.622752	0.196116	0.196116	0.681385	0.339683	0.138675	0.226455	0.532181	0.858754	0.138675	0.392232	0.392232	0.196116	0.518875	0.920737	0.196116	Sample_151:0/1;Sample_1540:0/1;Sample_1799:1/1;Sample_1825:0/1;Sample_185:0/1;Sample_282:0/1;Sample_320:0/1;Sample_421:0/1;Sample_422:0/1;Sample_423:1/1;Sample_424:0/1;Sample_425:1/1;Sample_426:0/1;Sample_427:1/1;Sample_433:0/1;Sample_434:1/1;Sample_435:0/1;Sample_436:1/1;Sample_437:0/1;Sample_498:0/1;Sample_504:0/1;Sample_599:0/1;Sample_748:0/1;Sample_831:0/1;Sample_B-8274:0/1;Sample_B-8323:0/1	1	1195212	1195213	2	TG	T	frameshift_variant	HIGH	CORT_0A05440	CPAR2_301790	orf19.6273	---		c.660delC	p.Ser221fs	660/1818	220/605	(CORT_0A05440|CORT_0A05440|1|1.00)	hypothetical protein	NA	NULL		TRUE
1_1195214_ATTTTCGAGCTG_A	0.226455	0.350823	0.485363	0.196116	0.196116	0.438529	0.622752	0.196116	0.196116	0.681385	0.339683	0.138675	0.226455	0.532181	0.858754	0.138675	0.392232	0.392232	0.196116	0.518875	0.920737	0.196116	Sample_151:0/1;Sample_1540:0/1;Sample_1799:1/1;Sample_1825:0/1;Sample_185:0/1;Sample_282:0/1;Sample_320:0/1;Sample_421:0/1;Sample_422:0/1;Sample_423:1/1;Sample_424:0/1;Sample_425:1/1;Sample_426:0/1;Sample_427:1/1;Sample_433:0/1;Sample_434:1/1;Sample_435:0/1;Sample_436:1/1;Sample_437:0/1;Sample_498:0/1;Sample_504:0/1;Sample_599:0/1;Sample_748:0/1;Sample_831:0/1;Sample_B-8274:0/1;Sample_B-8323:0/1	1	1195214	1195225	12	ATTTTCGAGCTG	A	frameshift_variant	HIGH	CORT_0A05440	CPAR2_301790	orf19.6273	---		c.648_658delCAGCTCGAAAA	p.Ser217fs	658/1818	216/605	(CORT_0A05440|CORT_0A05440|1|1.00)	hypothetical protein	NA	NULL		TRUE
1_1196105_A_C	0.226455	0.350823	0.485363	0.196116	0.196116	0.438529	0.622752	0.196116	0.196116	0.681385	0.339683	0.138675	0.226455	0.532181	0.858754	0.138675	0.392232	0.392232	0.196116	0.518875	0.920737	0.196116	Sample_151:0/1;Sample_1540:0/1;Sample_1799:1/1;Sample_1825:0/1;Sample_185:0/1;Sample_282:0/1;Sample_320:0/1;Sample_421:0/1;Sample_422:0/1;Sample_423:1/1;Sample_424:0/1;Sample_425:0/1;Sample_426:0/1;Sample_427:1/1;Sample_433:0/1;Sample_434:1/1;Sample_435:0/1;Sample_436:1/1;Sample_437:0/1;Sample_498:0/1;Sample_504:1/1;Sample_599:0/1;Sample_748:0/1;Sample_831:1/1;Sample_B-8274:0/1;Sample_B-8323:0/1	1	1196105	1196105	1	A	C	stop_lost&splice_region_variant	HIGH	CORT_0A05450	CPAR2_301800	orf19.1570	YHR072W	ERG7,ERG7	c.2179T>G	p.Ter727Gluext*?	2179/2181	727/726	character(0)	2,3-epoxysqualene-lanosterol cyclase (lanosterol synthase), catalyzes the conversion of 2,3-oxidosqualene to lanosterol in sterol biosynthesis	;viable;|;virulence: absent;	NULL|Squalene cyclase|Terpenoid cyclases/protein prenyltransferase alpha-alpha toroid|Prenyltransferase/squalene oxidase|Terpene synthase, conserved site	|Molecular Function: intramolecular transferase activity (GO:0016866)|Molecular Function: catalytic activity (GO:0003824)	FALSE
1_1196440_CA_C	0.226455	0.350823	0.485363	0.196116	0.196116	0.438529	0.622752	0.196116	0.196116	0.681385	0.339683	0.138675	0.226455	0.532181	0.858754	0.138675	0.392232	0.392232	0.196116	0.518875	0.920737	0.196116	Sample_151:0/1;Sample_1540:0/1;Sample_1799:1/1;Sample_1825:0/1;Sample_185:0/1;Sample_282:0/1;Sample_320:0/1;Sample_421:0/1;Sample_422:0/1;Sample_423:1/1;Sample_424:0/1;Sample_425:0/1;Sample_426:0/1;Sample_427:1/1;Sample_433:0/1;Sample_434:1/1;Sample_435:0/1;Sample_436:1/1;Sample_437:0/1;Sample_498:0/1;Sample_504:0/1;Sample_599:0/1;Sample_748:0/1;Sample_831:0/1;Sample_B-8274:0/1;Sample_B-8323:0/1	1	1196440	1196441	2	CA	C	frameshift_variant	HIGH	CORT_0A05450	CPAR2_301800	orf19.1570	YHR072W	ERG7,ERG7	c.1843delT	p.Cys615fs	1843/2181	615/726	(CORT_0A05450|CORT_0A05450|1|1.00)	2,3-epoxysqualene-lanosterol cyclase (lanosterol synthase), catalyzes the conversion of 2,3-oxidosqualene to lanosterol in sterol biosynthesis	;viable;|;virulence: absent;	NULL|Squalene cyclase|Terpenoid cyclases/protein prenyltransferase alpha-alpha toroid|Prenyltransferase/squalene oxidase|Terpene synthase, conserved site	|Molecular Function: intramolecular transferase activity (GO:0016866)|Molecular Function: catalytic activity (GO:0003824)	TRUE
1_1196446_T_TC	0.226455	0.350823	0.485363	0.196116	0.196116	0.438529	0.622752	0.196116	0.196116	0.681385	0.339683	0.138675	0.226455	0.532181	0.858754	0.138675	0.392232	0.392232	0.196116	0.518875	0.920737	0.196116	Sample_151:0/1;Sample_1540:0/1;Sample_1799:1/1;Sample_1825:0/1;Sample_185:0/1;Sample_282:0/1;Sample_320:0/1;Sample_421:0/1;Sample_422:0/1;Sample_423:1/1;Sample_424:0/1;Sample_425:0/1;Sample_426:0/1;Sample_427:1/1;Sample_433:0/1;Sample_434:1/1;Sample_435:0/1;Sample_436:1/1;Sample_437:0/1;Sample_498:0/1;Sample_504:0/1;Sample_599:0/1;Sample_748:0/1;Sample_831:0/1;Sample_B-8274:0/1;Sample_B-8323:0/1	1	1196446	1196446	1	T	TC	frameshift_variant	HIGH	CORT_0A05450	CPAR2_301800	orf19.1570	YHR072W	ERG7,ERG7	c.1837_1838insG	p.Lys613fs	1837/2181	613/726	(CORT_0A05450|CORT_0A05450|1|1.00)	2,3-epoxysqualene-lanosterol cyclase (lanosterol synthase), catalyzes the conversion of 2,3-oxidosqualene to lanosterol in sterol biosynthesis	;viable;|;virulence: absent;	NULL|Squalene cyclase|Terpenoid cyclases/protein prenyltransferase alpha-alpha toroid|Prenyltransferase/squalene oxidase|Terpene synthase, conserved site	|Molecular Function: intramolecular transferase activity (GO:0016866)|Molecular Function: catalytic activity (GO:0003824)	TRUE
1_1205365_C_CA	0.23094	0.268328	0.424264	0.2	0.2	0.447214	0.635085	0.2	0.2	0.694879	0.34641	0.141421	0.23094	0.54272	0.834058	0.141421	0.4	0.4	0.2	0.52915	0.898146	0.2	Sample_151:0/1;Sample_1540:0/1;Sample_1799:0/1;Sample_1825:0/1;Sample_185:0/1;Sample_282:0/1;Sample_320:0/1;Sample_421:0/1;Sample_422:0/1;Sample_423:0/1;Sample_424:0/1;Sample_425:0/1;Sample_427:0/1;Sample_433:0/1;Sample_434:0/1;Sample_435:0/1;Sample_436:0/1;Sample_437:0/1;Sample_498:0/1;Sample_504:0/1;Sample_599:0/1;Sample_748:0/1;Sample_831:0/1;Sample_B-8274:0/1;Sample_B-8323:0/1	1	1205365	1205365	1	C	CA	frameshift_variant	HIGH	CORT_0A05480	---	---	---		c.764dupT	p.Met255fs	764/816	255/271	(CORT_0A05480|CORT_0A05480|1|1.00)	hypothetical protein	NA	NULL		FALSE
1_1205505_T_TCA	0.226455	0.350823	0.485363	0.196116	0.196116	0.438529	0.622752	0.196116	0.196116	0.681385	0.339683	0.138675	0.226455	0.532181	0.858754	0.138675	0.392232	0.392232	0.196116	0.518875	0.920737	0.196116	Sample_151:0/1;Sample_1540:0/1;Sample_1799:0/1;Sample_1825:0/1;Sample_185:0/1;Sample_282:0/1;Sample_320:0/1;Sample_421:0/1;Sample_422:0/1;Sample_423:0/1;Sample_424:0/1;Sample_425:0/1;Sample_426:0/1;Sample_427:0/1;Sample_433:0/1;Sample_434:0/1;Sample_435:0/1;Sample_436:0/1;Sample_437:0/1;Sample_498:0/1;Sample_504:0/1;Sample_599:0/1;Sample_748:0/1;Sample_831:1/1;Sample_B-8274:0/1;Sample_B-8323:0/1	1	1205505	1205505	1	T	TCA	frameshift_variant	HIGH	CORT_0A05480	---	---	---		c.624_625insTG	p.Thr209fs	624/816	208/271	(CORT_0A05480|CORT_0A05480|1|1.00)	hypothetical protein	NA	NULL		TRUE
1_1205507_CTT_C	0.226455	0.350823	0.485363	0.196116	0.196116	0.438529	0.622752	0.196116	0.196116	0.681385	0.339683	0.138675	0.226455	0.532181	0.858754	0.138675	0.392232	0.392232	0.196116	0.518875	0.920737	0.196116	Sample_151:0/1;Sample_1540:0/1;Sample_1799:0/1;Sample_1825:0/1;Sample_185:0/1;Sample_282:0/1;Sample_320:0/1;Sample_421:0/1;Sample_422:0/1;Sample_423:0/1;Sample_424:0/1;Sample_425:0/1;Sample_426:0/1;Sample_427:0/1;Sample_433:0/1;Sample_434:0/1;Sample_435:0/1;Sample_436:0/1;Sample_437:0/1;Sample_498:0/1;Sample_504:0/1;Sample_599:0/1;Sample_748:0/1;Sample_831:1/1;Sample_B-8274:0/1;Sample_B-8323:0/1	1	1205507	1205509	3	CTT	C	frameshift_variant	HIGH	CORT_0A05480	---	---	---		c.621_622delAA	p.Ile207fs	622/816	207/271	(CORT_0A05480|CORT_0A05480|1|1.00)	hypothetical protein	NA	NULL		TRUE
1_1205516_ACT_A	0.226455	0.350823	0.485363	0.196116	0.196116	0.438529	0.622752	0.196116	0.196116	0.681385	0.339683	0.138675	0.226455	0.532181	0.858754	0.138675	0.392232	0.392232	0.196116	0.518875	0.920737	0.196116	Sample_151:0/1;Sample_1540:0/1;Sample_1799:0/1;Sample_1825:0/1;Sample_185:0/1;Sample_282:0/1;Sample_320:0/1;Sample_421:0/1;Sample_422:0/1;Sample_423:0/1;Sample_424:0/1;Sample_425:0/1;Sample_426:0/1;Sample_427:0/1;Sample_433:0/1;Sample_434:0/1;Sample_435:0/1;Sample_436:0/1;Sample_437:0/1;Sample_498:0/1;Sample_504:0/1;Sample_599:0/1;Sample_748:0/1;Sample_831:1/1;Sample_B-8274:0/1;Sample_B-8323:0/1	1	1205516	1205518	3	ACT	A	frameshift_variant	HIGH	CORT_0A05480	---	---	---		c.612_613delAG	p.Val205fs	613/816	204/271	(CORT_0A05480|CORT_0A05480|1|1.00)	hypothetical protein	NA	NULL		TRUE
1_1205520_T_TCC	0.226455	0.350823	0.485363	0.196116	0.196116	0.438529	0.622752	0.196116	0.196116	0.681385	0.339683	0.138675	0.226455	0.532181	0.858754	0.138675	0.392232	0.392232	0.196116	0.518875	0.920737	0.196116	Sample_151:0/1;Sample_1540:0/1;Sample_1799:0/1;Sample_1825:0/1;Sample_185:0/1;Sample_282:0/1;Sample_320:0/1;Sample_421:0/1;Sample_422:0/1;Sample_423:0/1;Sample_424:0/1;Sample_425:0/1;Sample_426:0/1;Sample_427:0/1;Sample_433:0/1;Sample_434:0/1;Sample_435:0/1;Sample_436:0/1;Sample_437:0/1;Sample_498:0/1;Sample_504:0/1;Sample_599:0/1;Sample_748:0/1;Sample_831:1/1;Sample_B-8274:0/1;Sample_B-8323:0/1	1	1205520	1205520	1	T	TCC	frameshift_variant	HIGH	CORT_0A05480	---	---	---		c.609_610insGG	p.Ile204fs	609/816	203/271	(CORT_0A05480|CORT_0A05480|1|1.00)	hypothetical protein	NA	NULL		TRUE
1_1205950_A_AT	0.34641	0.357771	0.494975	0.2	0.2	0.447214	0.57735	0.2	0.2	0.694879	0.34641	0.282843	0.34641	0.603023	0.834058	0.141421	0.4	0.4	0.2	0.52915	0.898146	0.2	Sample_151:0/1;Sample_1540:0/1;Sample_1799:0/1;Sample_1825:0/1;Sample_185:0/1;Sample_282:0/1;Sample_320:0/1;Sample_421:0/1;Sample_422:0/1;Sample_423:0/1;Sample_425:0/1;Sample_427:0/1;Sample_428:1/1;Sample_433:0/1;Sample_434:0/1;Sample_435:0/1;Sample_436:1/1;Sample_437:0/1;Sample_498:0/1;Sample_504:0/1;Sample_599:0/1;Sample_748:0/1;Sample_831:0/1;Sample_B-8274:0/1;Sample_B-8323:0/1	1	1205950	1205950	1	A	AT	frameshift_variant	HIGH	CORT_0A05480	---	---	---		c.179_180insA	p.Ser61fs	179/816	60/271	(CORT_0A05480|CORT_0A05480|1|1.00)	hypothetical protein	NA	NULL		TRUE
1_1205952_TC_T	0.34641	0.357771	0.494975	0.2	0.2	0.447214	0.57735	0.2	0.2	0.694879	0.34641	0.282843	0.34641	0.603023	0.834058	0.141421	0.4	0.4	0.2	0.52915	0.898146	0.2	Sample_151:0/1;Sample_1540:0/1;Sample_1799:0/1;Sample_1825:0/1;Sample_185:0/1;Sample_282:0/1;Sample_320:0/1;Sample_421:0/1;Sample_422:0/1;Sample_423:0/1;Sample_425:0/1;Sample_427:0/1;Sample_428:1/1;Sample_433:0/1;Sample_434:0/1;Sample_435:0/1;Sample_436:0/1;Sample_437:0/1;Sample_498:0/1;Sample_504:0/1;Sample_599:0/1;Sample_748:0/1;Sample_831:0/1;Sample_B-8274:0/1;Sample_B-8323:0/1	1	1205952	1205953	2	TC	T	frameshift_variant	HIGH	CORT_0A05480	---	---	---		c.177delG	p.Ile60fs	177/816	59/271	(CORT_0A05480|CORT_0A05480|1|1.00)	hypothetical protein	NA	NULL		TRUE
1_1206000_G_A	0.353553	0.456435	0.505181	0.204124	0.204124	0.365148	0.53033	0.204124	0.204124	0.545545	0.235702	0.288675	0.353553	0.553912	0.851257	0.144338	0.306186	0.306186	0.204124	0.46291	0.875	0.204124	Sample_151:0/1;Sample_1540:0/1;Sample_1799:0/1;Sample_185:0/1;Sample_282:0/1;Sample_320:0/1;Sample_421:0/1;Sample_422:0/1;Sample_423:0/1;Sample_424:0/1;Sample_425:0/1;Sample_426:0/1;Sample_427:0/1;Sample_428:1/1;Sample_433:0/1;Sample_434:0/1;Sample_435:0/1;Sample_437:0/1;Sample_498:0/1;Sample_504:0/1;Sample_748:0/1;Sample_831:0/1;Sample_B-8274:0/1;Sample_B-8323:0/1	1	1206000	1206000	1	G	A	stop_gained	HIGH	CORT_0A05480	---	---	---		c.130C>T	p.Gln44*	130/816	44/271	character(0)	hypothetical protein	NA	NULL		FALSE
1_1215478_GGT_G	0.226455	0.350823	0.485363	0.196116	0.196116	0.438529	0.622752	0.196116	0.196116	0.681385	0.339683	0.138675	0.226455	0.532181	0.858754	0.138675	0.392232	0.392232	0.196116	0.518875	0.920737	0.196116	Sample_151:0/1;Sample_1540:0/1;Sample_1799:0/1;Sample_1825:0/1;Sample_185:0/1;Sample_282:0/1;Sample_320:0/1;Sample_421:0/1;Sample_422:0/1;Sample_423:0/1;Sample_424:0/1;Sample_425:0/1;Sample_426:0/1;Sample_427:0/1;Sample_433:0/1;Sample_434:0/1;Sample_435:0/1;Sample_436:0/1;Sample_437:0/1;Sample_498:0/1;Sample_504:0/1;Sample_599:0/1;Sample_748:0/1;Sample_831:0/1;Sample_B-8274:0/1;Sample_B-8323:0/1	1	1215478	1215480	3	GGT	G	frameshift_variant	HIGH	CORT_0A05520	CPAR2_403990	orf19.4878	YIR003W	,AIM21	c.1688_1689delGT	p.Gly563fs	1688/1851	563/616	(CORT_0A05520|CORT_0A05520|1|1.00)	hypothetical protein	NA	NA	NA	TRUE
1_1215482_T_TTC	0.226455	0.350823	0.485363	0.196116	0.196116	0.438529	0.622752	0.196116	0.196116	0.681385	0.339683	0.138675	0.226455	0.532181	0.858754	0.138675	0.392232	0.392232	0.196116	0.518875	0.920737	0.196116	Sample_151:0/1;Sample_1540:0/1;Sample_1799:0/1;Sample_1825:0/1;Sample_185:0/1;Sample_282:0/1;Sample_320:0/1;Sample_421:0/1;Sample_422:0/1;Sample_423:0/1;Sample_424:0/1;Sample_425:0/1;Sample_426:0/1;Sample_427:0/1;Sample_433:0/1;Sample_434:0/1;Sample_435:0/1;Sample_436:0/1;Sample_437:0/1;Sample_498:0/1;Sample_504:0/1;Sample_599:0/1;Sample_748:0/1;Sample_831:0/1;Sample_B-8274:0/1;Sample_B-8323:0/1	1	1215482	1215482	1	T	TTC	frameshift_variant	HIGH	CORT_0A05520	CPAR2_403990	orf19.4878	YIR003W	,AIM21	c.1691_1692insTC	p.His565fs	1692/1851	564/616	(CORT_0A05520|CORT_0A05520|1|1.00)	hypothetical protein	NA	NA	NA	TRUE
1_1215568_C_CGA	0.226455	0.350823	0.485363	0.196116	0.196116	0.438529	0.622752	0.196116	0.196116	0.681385	0.339683	0.138675	0.226455	0.532181	0.858754	0.138675	0.392232	0.392232	0.196116	0.518875	0.920737	0.196116	Sample_151:0/1;Sample_1540:0/1;Sample_1799:0/1;Sample_1825:0/1;Sample_185:0/1;Sample_282:0/1;Sample_320:0/1;Sample_421:0/1;Sample_422:0/1;Sample_423:0/1;Sample_424:0/1;Sample_425:0/1;Sample_426:0/1;Sample_427:0/1;Sample_433:0/1;Sample_434:0/1;Sample_435:0/1;Sample_436:0/1;Sample_437:0/1;Sample_498:0/1;Sample_504:0/1;Sample_599:0/1;Sample_748:0/1;Sample_831:0/1;Sample_B-8274:0/1;Sample_B-8323:0/1	1	1215568	1215568	1	C	CGA	frameshift_variant	HIGH	CORT_0A05520	CPAR2_403990	orf19.4878	YIR003W	,AIM21	c.1777_1778insGA	p.Gln593fs	1778/1851	593/616	character(0)	hypothetical protein	NA	NA	NA	TRUE
1_1215570_ACG_A	0.226455	0.350823	0.485363	0.196116	0.196116	0.438529	0.622752	0.196116	0.196116	0.681385	0.339683	0.138675	0.226455	0.532181	0.858754	0.138675	0.392232	0.392232	0.196116	0.518875	0.920737	0.196116	Sample_151:0/1;Sample_1540:0/1;Sample_1799:0/1;Sample_1825:0/1;Sample_185:0/1;Sample_282:0/1;Sample_320:0/1;Sample_421:0/1;Sample_422:0/1;Sample_423:0/1;Sample_424:0/1;Sample_425:0/1;Sample_426:0/1;Sample_427:0/1;Sample_433:0/1;Sample_434:0/1;Sample_435:0/1;Sample_436:0/1;Sample_437:0/1;Sample_498:0/1;Sample_504:0/1;Sample_599:0/1;Sample_748:0/1;Sample_831:0/1;Sample_B-8274:0/1;Sample_B-8323:0/1	1	1215570	1215572	3	ACG	A	frameshift_variant	HIGH	CORT_0A05520	CPAR2_403990	orf19.4878	YIR003W	,AIM21	c.1780_1781delCG	p.Arg594fs	1780/1851	594/616	character(0)	hypothetical protein	NA	NA	NA	TRUE
1_1227543_TC_T	0.120386	0.0932505	0.368605	0	0	0.466252	0.662122	0.208514	0.208514	0.724462	0.361158	0	0	0.377217	0.782609	0.147442	0.417029	0.417029	0.208514	0.472866	0.893819	0.208514	Sample_151:0/1;Sample_1540:0/1;Sample_1825:0/1;Sample_185:0/1;Sample_282:0/1;Sample_320:0/1;Sample_421:0/1;Sample_422:0/1;Sample_424:0/1;Sample_425:0/1;Sample_426:0/1;Sample_427:0/1;Sample_433:0/1;Sample_435:0/1;Sample_436:0/1;Sample_437:0/1;Sample_498:0/1;Sample_504:0/1;Sample_599:0/1;Sample_748:0/1;Sample_831:0/1;Sample_B-8274:0/1;Sample_B-8323:0/1	1	1227543	1227544	2	TC	T	frameshift_variant	HIGH	CORT_0A05570	CPAR2_206240	orf19.1156	YCL027W	FUS1,FUS1	c.515delC	p.Ser172fs	515/1125	172/374	(CORT_0A05570|CORT_0A05570|1|1.00)	similar to C. parapsilosis CPAR2_206240 and C. albicans FUS1similar to S. cerevisiae Fus1p, a membrane protein required for mating	;viable;|;mating efficiency: decreased;	Src homology-3 domain|NULL	Molecular Function: protein binding (GO:0005515)|	TRUE
1_1227547_A_AG	0.120386	0.0932505	0.368605	0	0	0.466252	0.662122	0.208514	0.208514	0.724462	0.361158	0	0	0.377217	0.782609	0.147442	0.417029	0.417029	0.208514	0.472866	0.893819	0.208514	Sample_151:0/1;Sample_1540:0/1;Sample_1825:0/1;Sample_185:0/1;Sample_282:0/1;Sample_320:0/1;Sample_421:0/1;Sample_422:0/1;Sample_424:0/1;Sample_425:0/1;Sample_426:0/1;Sample_427:0/1;Sample_433:0/1;Sample_435:0/1;Sample_436:0/1;Sample_437:0/1;Sample_498:0/1;Sample_504:0/1;Sample_599:0/1;Sample_748:0/1;Sample_831:0/1;Sample_B-8274:0/1;Sample_B-8323:0/1	1	1227547	1227547	1	A	AG	frameshift_variant	HIGH	CORT_0A05570	CPAR2_206240	orf19.1156	YCL027W	FUS1,FUS1	c.519dupG	p.Pro174fs	520/1125	174/374	(CORT_0A05570|CORT_0A05570|1|1.00)	similar to C. parapsilosis CPAR2_206240 and C. albicans FUS1similar to S. cerevisiae Fus1p, a membrane protein required for mating	;viable;|;mating efficiency: decreased;	Src homology-3 domain|NULL	Molecular Function: protein binding (GO:0005515)|	TRUE
1_1227588_G_GAATT	0.120386	0.0932505	0.368605	0	0	0.466252	0.662122	0.208514	0.208514	0.724462	0.361158	0	0	0.377217	0.782609	0.147442	0.417029	0.417029	0.208514	0.472866	0.893819	0.208514	Sample_151:0/1;Sample_1540:0/1;Sample_1825:0/1;Sample_185:0/1;Sample_282:0/1;Sample_320:0/1;Sample_421:0/1;Sample_422:0/1;Sample_424:0/1;Sample_425:0/1;Sample_426:0/1;Sample_427:0/1;Sample_433:0/1;Sample_435:0/1;Sample_436:0/1;Sample_437:0/1;Sample_498:0/1;Sample_504:0/1;Sample_599:0/1;Sample_748:0/1;Sample_831:0/1;Sample_B-8274:0/1;Sample_B-8323:0/1	1	1227588	1227588	1	G	GAATT	frameshift_variant	HIGH	CORT_0A05570	CPAR2_206240	orf19.1156	YCL027W	FUS1,FUS1	c.559_560insAATT	p.Val187fs	560/1125	187/374	(CORT_0A05570|CORT_0A05570|1|1.00)	similar to C. parapsilosis CPAR2_206240 and C. albicans FUS1similar to S. cerevisiae Fus1p, a membrane protein required for mating	;viable;|;mating efficiency: decreased;	Src homology-3 domain|NULL	Molecular Function: protein binding (GO:0005515)|	TRUE
1_1227591_TTTTG_T	0.120386	0.0932505	0.368605	0	0	0.466252	0.662122	0.208514	0.208514	0.724462	0.361158	0	0	0.377217	0.782609	0.147442	0.417029	0.417029	0.208514	0.472866	0.893819	0.208514	Sample_151:0/1;Sample_1540:0/1;Sample_1825:0/1;Sample_185:0/1;Sample_282:0/1;Sample_320:0/1;Sample_421:0/1;Sample_422:0/1;Sample_424:0/1;Sample_425:0/1;Sample_426:0/1;Sample_427:0/1;Sample_433:0/1;Sample_435:0/1;Sample_436:0/1;Sample_437:0/1;Sample_498:0/1;Sample_504:0/1;Sample_599:0/1;Sample_748:0/1;Sample_831:0/1;Sample_B-8274:0/1;Sample_B-8323:0/1	1	1227591	1227595	5	TTTTG	T	frameshift_variant	HIGH	CORT_0A05570	CPAR2_206240	orf19.1156	YCL027W	FUS1,FUS1	c.564_567delTTGT	p.Cys189fs	564/1125	188/374	(CORT_0A05570|CORT_0A05570|1|1.00)	similar to C. parapsilosis CPAR2_206240 and C. albicans FUS1similar to S. cerevisiae Fus1p, a membrane protein required for mating	;viable;|;mating efficiency: decreased;	Src homology-3 domain|NULL	Molecular Function: protein binding (GO:0005515)|	TRUE
1_1247260_G_GTA	0.23094	0.357771	0.424264	0.2	0.2	0.357771	0.57735	0.2	0.2	0.641427	0.34641	0.141421	0.23094	0.54272	0.834058	0.141421	0.3	0.3	0.2	0.453557	0.898146	0.2	Sample_151:0/1;Sample_1540:0/1;Sample_1799:0/1;Sample_1825:0/1;Sample_185:0/1;Sample_282:0/1;Sample_320:0/1;Sample_421:0/1;Sample_422:0/1;Sample_423:0/1;Sample_424:0/1;Sample_425:0/1;Sample_426:0/1;Sample_427:1/1;Sample_433:0/1;Sample_434:0/1;Sample_435:1/1;Sample_437:0/1;Sample_498:0/1;Sample_504:0/1;Sample_599:0/1;Sample_748:0/1;Sample_831:0/1;Sample_B-8274:0/1;Sample_B-8323:1/1	1	1247260	1247260	1	G	GTA	frameshift_variant	HIGH	CORT_0A05640	---	orf19.6269	---		c.51_52insTA	p.Pro18fs	51/2274	17/757	character(0)	similar to C. albicans orf19.6269	NA	NA	NA	FALSE
1_1248035_GA_G	0.23094	0.357771	0.424264	0.2	0.2	0.357771	0.57735	0.2	0.2	0.641427	0.34641	0.141421	0.23094	0.54272	0.834058	0.141421	0.3	0.3	0.2	0.453557	0.898146	0.2	Sample_151:0/1;Sample_1540:0/1;Sample_1799:0/1;Sample_1825:0/1;Sample_185:0/1;Sample_282:0/1;Sample_320:0/1;Sample_421:0/1;Sample_422:0/1;Sample_423:0/1;Sample_424:0/1;Sample_425:0/1;Sample_426:0/1;Sample_427:0/1;Sample_433:0/1;Sample_434:0/1;Sample_435:1/1;Sample_437:0/1;Sample_498:0/1;Sample_504:0/1;Sample_599:0/1;Sample_748:0/1;Sample_831:0/1;Sample_B-8274:0/1;Sample_B-8323:0/1	1	1248035	1248036	2	GA	G	frameshift_variant	HIGH	CORT_0A05650	CPAR2_206300	orf19.6271	YPR045C	THP3,	c.81delA	p.Gly28fs	81/2076	27/691	character(0)	hypothetical protein	;viable;	NULL|SAC3/GANP/Nin1/mts3/eIF-3 p25		TRUE
1_1248037_GGAGAAAACCGAAGA_G	0.123091	0.0953463	0.301511	0	0	0.381385	0.615457	0.213201	0.213201	0.683763	0.369274	0	0	0.385695	0.755742	0.150756	0.319801	0.319801	0.213201	0.402911	0.870388	0.213201	Sample_151:0/1;Sample_1540:0/1;Sample_1825:0/1;Sample_185:0/1;Sample_282:0/1;Sample_320:0/1;Sample_421:0/1;Sample_422:0/1;Sample_424:0/1;Sample_425:0/1;Sample_426:0/1;Sample_427:0/1;Sample_433:0/1;Sample_435:1/1;Sample_437:0/1;Sample_498:0/1;Sample_504:0/1;Sample_599:0/1;Sample_748:0/1;Sample_831:0/1;Sample_B-8274:0/1;Sample_B-8323:0/1	1	1248037	1248051	15	GGAGAAAACCGAAGA	G	frameshift_variant	HIGH	CORT_0A05650	CPAR2_206300	orf19.6271	YPR045C	THP3,	c.84_97delAGAAAACCGAAGAG	p.Glu29fs	84/2076	28/691	character(0)	hypothetical protein	;viable;	NULL|SAC3/GANP/Nin1/mts3/eIF-3 p25		TRUE
1_1255875_GT_G	0.226455	0.350823	0.485363	0.196116	0.196116	0.438529	0.622752	0.196116	0.196116	0.681385	0.339683	0.138675	0.226455	0.532181	0.858754	0.138675	0.392232	0.392232	0.196116	0.518875	0.920737	0.196116	Sample_151:0/1;Sample_1540:0/1;Sample_1799:0/1;Sample_1825:1/1;Sample_185:0/1;Sample_282:0/1;Sample_320:0/1;Sample_421:0/1;Sample_422:0/1;Sample_423:0/1;Sample_424:0/1;Sample_425:0/1;Sample_426:0/1;Sample_427:0/1;Sample_433:0/1;Sample_434:0/1;Sample_435:0/1;Sample_436:0/1;Sample_437:0/1;Sample_498:0/1;Sample_504:1/1;Sample_599:0/1;Sample_748:1/1;Sample_831:1/1;Sample_B-8274:0/1;Sample_B-8323:0/1	1	1255875	1255876	2	GT	G	frameshift_variant	HIGH	CORT_0A05680	CPAR2_206330	orf19.1574	YMR227C	TAF7,	c.21delT	p.Phe7fs	21/1890	7/629	character(0)	hypothetical protein	;viable;	TAFII55 protein, conserved region|NULL	Cellular Component: transcription factor TFIID complex (GO:0005669), Biological Process: transcription initiation from RNA polymerase II promoter (GO:0006367)|	FALSE
1_1255929_T_TC	0.226455	0.350823	0.485363	0.196116	0.196116	0.438529	0.622752	0.196116	0.196116	0.681385	0.339683	0.138675	0.226455	0.532181	0.858754	0.138675	0.392232	0.392232	0.196116	0.518875	0.920737	0.196116	Sample_151:0/1;Sample_1540:0/1;Sample_1799:0/1;Sample_1825:1/1;Sample_185:0/1;Sample_282:0/1;Sample_320:0/1;Sample_421:0/1;Sample_422:0/1;Sample_423:0/1;Sample_424:0/1;Sample_425:0/1;Sample_426:0/1;Sample_427:0/1;Sample_433:0/1;Sample_434:0/1;Sample_435:0/1;Sample_436:0/1;Sample_437:0/1;Sample_498:0/1;Sample_504:1/1;Sample_599:0/1;Sample_748:1/1;Sample_831:1/1;Sample_B-8274:0/1;Sample_B-8323:0/1	1	1255929	1255929	1	T	TC	frameshift_variant	HIGH	CORT_0A05680	CPAR2_206330	orf19.1574	YMR227C	TAF7,	c.71_72insC	p.Asn25fs	72/1890	24/629	character(0)	hypothetical protein	;viable;	TAFII55 protein, conserved region|NULL	Cellular Component: transcription factor TFIID complex (GO:0005669), Biological Process: transcription initiation from RNA polymerase II promoter (GO:0006367)|	FALSE
1_1255952_C_T	0.226455	0.350823	0.485363	0.196116	0.196116	0.438529	0.622752	0.196116	0.196116	0.681385	0.339683	0.138675	0.226455	0.532181	0.858754	0.138675	0.392232	0.392232	0.196116	0.518875	0.920737	0.196116	Sample_151:0/1;Sample_1540:0/1;Sample_1799:0/1;Sample_1825:1/1;Sample_185:0/1;Sample_282:0/1;Sample_320:0/1;Sample_421:0/1;Sample_422:0/1;Sample_423:0/1;Sample_424:0/1;Sample_425:0/1;Sample_426:0/1;Sample_427:0/1;Sample_433:0/1;Sample_434:0/1;Sample_435:0/1;Sample_436:0/1;Sample_437:0/1;Sample_498:0/1;Sample_504:1/1;Sample_599:0/1;Sample_748:1/1;Sample_831:1/1;Sample_B-8274:0/1;Sample_B-8323:0/1	1	1255952	1255952	1	C	T	stop_gained	HIGH	CORT_0A05680	CPAR2_206330	orf19.1574	YMR227C	TAF7,	c.94C>T	p.Gln32*	94/1890	32/629	character(0)	hypothetical protein	;viable;	TAFII55 protein, conserved region|NULL	Cellular Component: transcription factor TFIID complex (GO:0005669), Biological Process: transcription initiation from RNA polymerase II promoter (GO:0006367)|	FALSE
1_1257342_A_AC	0.226455	0.350823	0.485363	0.196116	0.196116	0.438529	0.622752	0.196116	0.196116	0.681385	0.339683	0.138675	0.226455	0.532181	0.858754	0.138675	0.392232	0.392232	0.196116	0.518875	0.920737	0.196116	Sample_151:0/1;Sample_1540:0/1;Sample_1799:0/1;Sample_1825:1/1;Sample_185:0/1;Sample_282:0/1;Sample_320:0/1;Sample_421:0/1;Sample_422:0/1;Sample_423:0/1;Sample_424:0/1;Sample_425:0/1;Sample_426:0/1;Sample_427:0/1;Sample_433:0/1;Sample_434:0/1;Sample_435:0/1;Sample_436:0/1;Sample_437:0/1;Sample_498:0/1;Sample_504:0/1;Sample_599:0/1;Sample_748:1/1;Sample_831:0/1;Sample_B-8274:0/1;Sample_B-8323:0/1	1	1257342	1257342	1	A	AC	frameshift_variant	HIGH	CORT_0A05680	CPAR2_206330	orf19.1574	YMR227C	TAF7,	c.1484_1485insC	p.Glu495fs	1485/1890	495/629	(CORT_0A05680|CORT_0A05680|1|1.00)	hypothetical protein	;viable;	TAFII55 protein, conserved region|NULL	Cellular Component: transcription factor TFIID complex (GO:0005669), Biological Process: transcription initiation from RNA polymerase II promoter (GO:0006367)|	TRUE
1_1257343_G_GGA	0.226455	0.350823	0.485363	0.196116	0.196116	0.438529	0.622752	0.196116	0.196116	0.681385	0.339683	0.138675	0.226455	0.532181	0.858754	0.138675	0.392232	0.392232	0.196116	0.518875	0.920737	0.196116	Sample_151:0/1;Sample_1540:0/1;Sample_1799:0/1;Sample_1825:1/1;Sample_185:0/1;Sample_282:0/1;Sample_320:0/1;Sample_421:0/1;Sample_422:0/1;Sample_423:0/1;Sample_424:0/1;Sample_425:0/1;Sample_426:0/1;Sample_427:0/1;Sample_433:0/1;Sample_434:0/1;Sample_435:0/1;Sample_436:0/1;Sample_437:0/1;Sample_498:0/1;Sample_504:0/1;Sample_599:0/1;Sample_748:1/1;Sample_831:0/1;Sample_B-8274:0/1;Sample_B-8323:0/1	1	1257343	1257343	1	G	GGA	frameshift_variant	HIGH	CORT_0A05680	CPAR2_206330	orf19.1574	YMR227C	TAF7,	c.1486_1487dupGA	p.Asp496fs	1488/1890	496/629	(CORT_0A05680|CORT_0A05680|1|1.00)	hypothetical protein	;viable;	TAFII55 protein, conserved region|NULL	Cellular Component: transcription factor TFIID complex (GO:0005669), Biological Process: transcription initiation from RNA polymerase II promoter (GO:0006367)|	TRUE
1_1268427_G_GA	0.120386	0.0932505	0.368605	0	0	0.466252	0.662122	0.208514	0.208514	0.724462	0.361158	0	0	0.377217	0.782609	0.147442	0.417029	0.417029	0.208514	0.472866	0.893819	0.208514	Sample_151:0/1;Sample_1540:0/1;Sample_1825:0/1;Sample_185:0/1;Sample_282:0/1;Sample_320:0/1;Sample_421:0/1;Sample_422:0/1;Sample_424:0/1;Sample_425:1/1;Sample_426:1/1;Sample_427:1/1;Sample_433:0/1;Sample_435:1/1;Sample_436:1/1;Sample_437:0/1;Sample_498:0/1;Sample_504:1/1;Sample_599:0/1;Sample_748:1/1;Sample_831:1/1;Sample_B-8274:0/1;Sample_B-8323:1/1	1	1268427	1268427	1	G	GA	frameshift_variant	HIGH	CORT_0A05730	CPAR2_206380	orf19.1578	YMR229C	RRP5,	c.3971dupA	p.Glu1325fs	3972/5118	1324/1705	(CORT_0A05730|CORT_0A05730|1|1.00)	hypothetical protein	;viable;	NULL|Ribosomal protein S1, RNA-binding domain|RNA-binding domain, S1|Tetratricopeptide repeat-containing domain|Tetratricopeptide-like helical|Nucleic acid-binding, OB-fold|Nucleic acid-binding, OB-fold-like|RNA-processing protein, HAT helix	|Molecular Function: RNA binding (GO:0003723)|Molecular Function: protein binding (GO:0005515)|Cellular Component: intracellular (GO:0005622), Biological Process: RNA processing (GO:0006396)	FALSE
1_1284394_T_TA	0.23094	0.357771	0.424264	0.2	0.2	0.357771	0.57735	0.2	0.2	0.641427	0.34641	0.141421	0.23094	0.54272	0.834058	0.141421	0.3	0.3	0.2	0.453557	0.898146	0.2	Sample_151:0/1;Sample_1540:0/1;Sample_1799:0/1;Sample_1825:0/1;Sample_185:0/1;Sample_282:0/1;Sample_320:0/1;Sample_421:0/1;Sample_422:0/1;Sample_423:0/1;Sample_424:1/1;Sample_425:0/1;Sample_426:0/1;Sample_427:0/1;Sample_433:0/1;Sample_434:0/1;Sample_435:0/1;Sample_437:0/1;Sample_498:0/1;Sample_504:0/1;Sample_599:0/1;Sample_748:1/1;Sample_831:0/1;Sample_B-8274:0/1;Sample_B-8323:0/1	1	1284394	1284394	1	T	TA	frameshift_variant	HIGH	CORT_0A05800	CPAR2_206440	orf19.3561	YDL017W	CDC7,CDC7	c.124dupA	p.Thr42fs	125/1839	42/612	(CORT_0A05800|CORT_0A05800|1|1.00)	putative kinase	;viable;	Serine/threonine-protein kinase, active site|NULL|Protein kinase-like domain|Protein kinase, catalytic domain	Molecular Function: protein serine/threonine kinase activity (GO:0004674), Biological Process: protein phosphorylation (GO:0006468)||Molecular Function: transferase activity, transferring phosphorus-containing groups (GO:0016772)|Molecular Function: protein kinase activity (GO:0004672), Molecular Function: ATP binding (GO:0005524), Biological Process: protein phosphorylation (GO:0006468)	FALSE
1_1286399_A_T	0.226455	0.350823	0.485363	0.196116	0.196116	0.438529	0.622752	0.196116	0.196116	0.681385	0.339683	0.138675	0.226455	0.532181	0.858754	0.138675	0.392232	0.392232	0.196116	0.518875	0.920737	0.196116	Sample_151:0/1;Sample_1540:0/1;Sample_1799:1/1;Sample_1825:0/1;Sample_185:0/1;Sample_282:0/1;Sample_320:0/1;Sample_421:0/1;Sample_422:0/1;Sample_423:1/1;Sample_424:1/1;Sample_425:0/1;Sample_426:0/1;Sample_427:0/1;Sample_433:0/1;Sample_434:1/1;Sample_435:0/1;Sample_436:1/1;Sample_437:0/1;Sample_498:0/1;Sample_504:0/1;Sample_599:0/1;Sample_748:1/1;Sample_831:0/1;Sample_B-8274:0/1;Sample_B-8323:0/1	1	1286399	1286399	1	A	T	stop_gained	HIGH	CORT_0A05810	CPAR2_206450	orf19.3563	---		c.1895T>A	p.Leu632*	1895/2034	632/677	character(0)	hypothetical protein	;viable;	NA	NA	FALSE
1_1298782_C_CA	0.226455	0.350823	0.485363	0.196116	0.196116	0.438529	0.622752	0.196116	0.196116	0.681385	0.339683	0.138675	0.226455	0.532181	0.858754	0.138675	0.392232	0.392232	0.196116	0.518875	0.920737	0.196116	Sample_151:0/1;Sample_1540:0/1;Sample_1799:0/1;Sample_1825:0/1;Sample_185:0/1;Sample_282:0/1;Sample_320:0/1;Sample_421:0/1;Sample_422:0/1;Sample_423:0/1;Sample_424:1/1;Sample_425:0/1;Sample_426:0/1;Sample_427:0/1;Sample_433:0/1;Sample_434:0/1;Sample_435:0/1;Sample_436:1/1;Sample_437:0/1;Sample_498:0/1;Sample_504:0/1;Sample_599:0/1;Sample_748:1/1;Sample_831:0/1;Sample_B-8274:0/1;Sample_B-8323:0/1	1	1298782	1298782	1	C	CA	frameshift_variant	HIGH	CORT_0A05850	CPAR2_206480	orf19.3555	YAR014C	BUD14,BUD14	c.1302_1303insT	p.Glu435fs	1302/1572	434/523	(CORT_0A05850|CORT_0A05850|1|1.00)	putative SH3-domain-containing protein	;viable;|;viable;	Src homology-3 domain|NULL	Molecular Function: protein binding (GO:0005515)|	FALSE
1_1314611_ATGAG_A	0.23094	0.357771	0.494975	0.2	0.2	0.447214	0.635085	0.2	0.2	0.694879	0.23094	0.141421	0.23094	0.54272	0.875761	0.141421	0.3	0.3	0.2	0.453557	0.898146	0.2	Sample_151:1/1;Sample_1540:1/1;Sample_1799:1/1;Sample_1825:1/1;Sample_185:1/1;Sample_282:0/1;Sample_320:0/1;Sample_421:1/1;Sample_422:1/1;Sample_423:1/1;Sample_424:0/1;Sample_425:0/1;Sample_426:0/1;Sample_427:0/1;Sample_433:1/1;Sample_434:1/1;Sample_435:0/1;Sample_436:0/1;Sample_437:1/1;Sample_498:0/1;Sample_504:0/1;Sample_599:1/1;Sample_748:1/1;Sample_B-8274:1/1;Sample_B-8323:0/1	1	1314611	1314615	5	ATGAG	A	stop_lost&splice_region_variant&conservative_inframe_deletion	HIGH	CORT_0A05920	CPAR2_206560	---	---		c.193_*1delTGAG	p.Ter65del	193/195	65/64	character(0)	hypothetical protein	NA	Heat shock protein 9/12	Biological Process: response to stress (GO:0006950)	FALSE
1_1326235_TTG_T	0.226455	0.350823	0.485363	0.196116	0.196116	0.438529	0.622752	0.196116	0.196116	0.681385	0.339683	0.138675	0.226455	0.532181	0.858754	0.138675	0.392232	0.392232	0.196116	0.518875	0.920737	0.196116	Sample_151:1/1;Sample_1540:1/1;Sample_1799:1/1;Sample_1825:1/1;Sample_185:1/1;Sample_282:0/1;Sample_320:0/1;Sample_421:1/1;Sample_422:1/1;Sample_423:1/1;Sample_424:0/1;Sample_425:0/1;Sample_426:0/1;Sample_427:0/1;Sample_433:1/1;Sample_434:1/1;Sample_435:0/1;Sample_436:0/1;Sample_437:1/1;Sample_498:0/1;Sample_504:0/1;Sample_599:1/1;Sample_748:1/1;Sample_831:1/1;Sample_B-8274:1/1;Sample_B-8323:0/1	1	1326235	1326237	3	TTG	T	frameshift_variant	HIGH	CORT_0A05970	CPAR2_206610	orf19.3545	YAR019C	CDC15,	c.467_468delCA	p.Ala156fs	468/3342	156/1113	(CORT_0A05970|CORT_0A05970|1|1.00)	hypothetical protein	propolis;resistance to chemicals: decreased;	Serine/threonine-protein kinase, active site|NULL|Protein kinase-like domain|Protein kinase, catalytic domain|Protein kinase, ATP binding site|Armadillo-type fold|Armadillo-like helical|Serine/threonine- / dual-specificity protein kinase, catalytic domain	Molecular Function: protein serine/threonine kinase activity (GO:0004674), Biological Process: protein phosphorylation (GO:0006468)||Molecular Function: transferase activity, transferring phosphorus-containing groups (GO:0016772)|Molecular Function: protein kinase activity (GO:0004672), Molecular Function: ATP binding (GO:0005524), Biological Process: protein phosphorylation (GO:0006468)|Molecula…	TRUE
1_1326238_C_CAT	0.226455	0.350823	0.485363	0.196116	0.196116	0.438529	0.622752	0.196116	0.196116	0.681385	0.339683	0.138675	0.226455	0.532181	0.858754	0.138675	0.392232	0.392232	0.196116	0.518875	0.920737	0.196116	Sample_151:1/1;Sample_1540:1/1;Sample_1799:1/1;Sample_1825:1/1;Sample_185:1/1;Sample_282:0/1;Sample_320:0/1;Sample_421:1/1;Sample_422:1/1;Sample_423:1/1;Sample_424:0/1;Sample_425:0/1;Sample_426:0/1;Sample_427:0/1;Sample_433:1/1;Sample_434:1/1;Sample_435:0/1;Sample_436:0/1;Sample_437:1/1;Sample_498:0/1;Sample_504:0/1;Sample_599:1/1;Sample_748:1/1;Sample_831:1/1;Sample_B-8274:1/1;Sample_B-8323:0/1	1	1326238	1326238	1	C	CAT	frameshift_variant	HIGH	CORT_0A05970	CPAR2_206610	orf19.3545	YAR019C	CDC15,	c.465_466insAT	p.Ala156fs	465/3342	155/1113	(CORT_0A05970|CORT_0A05970|1|1.00)	hypothetical protein	propolis;resistance to chemicals: decreased;	Serine/threonine-protein kinase, active site|NULL|Protein kinase-like domain|Protein kinase, catalytic domain|Protein kinase, ATP binding site|Armadillo-type fold|Armadillo-like helical|Serine/threonine- / dual-specificity protein kinase, catalytic domain	Molecular Function: protein serine/threonine kinase activity (GO:0004674), Biological Process: protein phosphorylation (GO:0006468)||Molecular Function: transferase activity, transferring phosphorus-containing groups (GO:0016772)|Molecular Function: protein kinase activity (GO:0004672), Molecular Function: ATP binding (GO:0005524), Biological Process: protein phosphorylation (GO:0006468)|Molecula…	TRUE
1_1330581_CAACAT_C	0.226455	0.350823	0.485363	0.196116	0.196116	0.438529	0.622752	0.196116	0.196116	0.681385	0.339683	0.138675	0.226455	0.532181	0.858754	0.138675	0.392232	0.392232	0.196116	0.518875	0.920737	0.196116	Sample_151:1/1;Sample_1540:1/1;Sample_1799:1/1;Sample_1825:1/1;Sample_185:1/1;Sample_282:0/1;Sample_320:0/1;Sample_421:1/1;Sample_422:1/1;Sample_423:1/1;Sample_424:0/1;Sample_425:0/1;Sample_426:1/1;Sample_427:1/1;Sample_433:1/1;Sample_434:1/1;Sample_435:1/1;Sample_436:0/1;Sample_437:1/1;Sample_498:0/1;Sample_504:0/1;Sample_599:1/1;Sample_748:1/1;Sample_831:1/1;Sample_B-8274:1/1;Sample_B-8323:0/1	1	1330581	1330586	6	CAACAT	C	frameshift_variant	HIGH	CORT_0A06000	CPAR2_206650	orf19.4444	YDL236W	PHO15,PHO13,PHO15	c.8_12delACATA	p.Asn3fs	8/975	3/324	character(0)	putative 4-nitrophenyl phosphatase, possible histone H2A phosphatase	;viable;|;phenotypic switching: increased;opaque-to-white switching|;competitive fitness: normal;R\I score is the median log2(R/I) value representing abundance of the mutant in recovered pool relative to inoculum|;colony appearance: abnormal;Morphology (M) score represents relative sizes of central and peripheral regions of colony|;vegetative growth: normal rate;|;viable;	NULL|Nitrophenylphosphatase-like domain|HAD-like domain|HAD-superfamily hydrolase, subfamily IIA|2-phosphoglycolate phosphatase, eukaryotic	|Biological Process: metabolic process (GO:0008152), Molecular Function: hydrolase activity (GO:0016787)|Biological Process: metabolic process (GO:0008152), Molecular Function: phosphatase activity (GO:0016791)	FALSE
1_1352335_GT_G	0.123091	0.0953463	0.376889	0	0	0.476731	0.677003	0	0.213201	0.740744	0.246183	0	0	0.385695	0.755742	0	0.426401	0.426401	0.213201	0.402911	0.870388	0	Sample_151:0/1;Sample_1540:0/1;Sample_1825:0/1;Sample_282:0/1;Sample_320:0/1;Sample_421:0/1;Sample_422:0/1;Sample_424:0/1;Sample_425:0/1;Sample_426:0/1;Sample_427:0/1;Sample_433:0/1;Sample_435:0/1;Sample_436:0/1;Sample_437:0/1;Sample_498:0/1;Sample_504:0/1;Sample_599:0/1;Sample_748:1/1;Sample_831:0/1;Sample_B-8274:0/1;Sample_B-8323:0/1	1	1352335	1352336	2	GT	G	frameshift_variant	HIGH	CORT_0A06100	CPAR2_206750	orf19.5087	YLR319C	BUD6,BUD6	c.17delA	p.Asn6fs	17/2013	6/670	character(0)	protein required for Spitzenkorper formation in hyphal cells in C. albicans	;viable;|;viable;|;viable;|;protein/peptide distribution: abnormal;the Spitzenkorper component Mlc1p is mislocalized to the polarisome|;hyphal growth: abnormal;broad hyphae, polarization defect	NULL|Actin interacting protein 3, C-terminal|Actin interacting protein 3		FALSE
1_1352351_A_G	0.123091	0.0953463	0.376889	0	0	0.476731	0.677003	0	0.213201	0.740744	0.246183	0	0	0.385695	0.755742	0	0.426401	0.426401	0.213201	0.402911	0.870388	0	Sample_151:0/1;Sample_1540:0/1;Sample_1825:0/1;Sample_282:0/1;Sample_320:0/1;Sample_421:0/1;Sample_422:0/1;Sample_424:0/1;Sample_425:0/1;Sample_426:0/1;Sample_427:0/1;Sample_433:0/1;Sample_435:0/1;Sample_436:0/1;Sample_437:0/1;Sample_498:0/1;Sample_504:0/1;Sample_599:0/1;Sample_748:1/1;Sample_831:0/1;Sample_B-8274:0/1;Sample_B-8323:0/1	1	1352351	1352351	1	A	G	start_lost	HIGH	CORT_0A06100	CPAR2_206750	orf19.5087	YLR319C	BUD6,BUD6	c.2T>C	p.Met1?	2013-02-01	1/670	(CORT_0A06100|CORT_0A06100|1|1.00)	protein required for Spitzenkorper formation in hyphal cells in C. albicans	;viable;|;viable;|;viable;|;protein/peptide distribution: abnormal;the Spitzenkorper component Mlc1p is mislocalized to the polarisome|;hyphal growth: abnormal;broad hyphae, polarization defect	NULL|Actin interacting protein 3, C-terminal|Actin interacting protein 3		FALSE
1_1356880_TC_T	0.235702	0.273861	0.433013	0.204124	0.204124	0.456435	0.648181	0	0.204124	0.709208	0.235702	0.144338	0.235702	0.492366	0.808694	0	0.408248	0.408248	0.204124	0.46291	0.916667	0	Sample_151:0/1;Sample_1540:0/1;Sample_1799:0/1;Sample_1825:0/1;Sample_282:0/1;Sample_320:0/1;Sample_421:0/1;Sample_422:0/1;Sample_423:0/1;Sample_424:0/1;Sample_425:1/1;Sample_426:1/1;Sample_427:1/1;Sample_433:0/1;Sample_435:1/1;Sample_436:1/1;Sample_437:0/1;Sample_498:0/1;Sample_504:1/1;Sample_599:0/1;Sample_748:1/1;Sample_831:1/1;Sample_B-8274:0/1;Sample_B-8323:1/1	1	1356880	1356881	2	TC	T	frameshift_variant	HIGH	CORT_0A06140	CPAR2_206790	orf19.6260	YJL197W	,UBP12	c.2446delG	p.Glu816fs	2446/3882	816/1293	(CORT_0A06140|CORT_0A06140|1|1.00)	S. cerevisiae homolog UBP12 localizes to cytoplasm, nucleus	NA	Peptidase C19, ubiquitin-specific peptidase, DUSP domain|Peptidase C19, ubiquitin carboxyl-terminal hydrolase 2|NULL|Peptidase C19, ubiquitin carboxyl-terminal hydrolase 2, conserved site	Molecular Function: ubiquitin thiolesterase activity (GO:0004221)|Molecular Function: ubiquitin thiolesterase activity (GO:0004221), Biological Process: ubiquitin-dependent protein catabolic process (GO:0006511)|	TRUE
1_1356882_TTC_T	0.235702	0.273861	0.433013	0.204124	0.204124	0.456435	0.648181	0	0.204124	0.709208	0.235702	0.144338	0.235702	0.492366	0.808694	0	0.408248	0.408248	0.204124	0.46291	0.916667	0	Sample_151:0/1;Sample_1540:0/1;Sample_1799:0/1;Sample_1825:0/1;Sample_282:0/1;Sample_320:0/1;Sample_421:0/1;Sample_422:0/1;Sample_423:0/1;Sample_424:0/1;Sample_425:1/1;Sample_426:1/1;Sample_427:1/1;Sample_433:0/1;Sample_435:1/1;Sample_436:1/1;Sample_437:0/1;Sample_498:0/1;Sample_504:1/1;Sample_599:0/1;Sample_748:1/1;Sample_831:1/1;Sample_B-8274:0/1;Sample_B-8323:1/1	1	1356882	1356884	3	TTC	T	frameshift_variant	HIGH	CORT_0A06140	CPAR2_206790	orf19.6260	YJL197W	,UBP12	c.2443_2444delGA	p.Glu815fs	2444/3882	815/1293	(CORT_0A06140|CORT_0A06140|1|1.00)	S. cerevisiae homolog UBP12 localizes to cytoplasm, nucleus	NA	Peptidase C19, ubiquitin-specific peptidase, DUSP domain|Peptidase C19, ubiquitin carboxyl-terminal hydrolase 2|NULL|Peptidase C19, ubiquitin carboxyl-terminal hydrolase 2, conserved site	Molecular Function: ubiquitin thiolesterase activity (GO:0004221)|Molecular Function: ubiquitin thiolesterase activity (GO:0004221), Biological Process: ubiquitin-dependent protein catabolic process (GO:0006511)|	TRUE
1_1359914_C_CCA	0.23094	0.357771	0.494975	0.2	0.2	0.447214	0.635085	0	0.2	0.694879	0.23094	0.141421	0.23094	0.54272	0.834058	0	0.4	0.4	0.2	0.453557	0.898146	0	Sample_151:0/1;Sample_1540:0/1;Sample_1799:0/1;Sample_1825:0/1;Sample_282:0/1;Sample_320:0/1;Sample_421:0/1;Sample_422:0/1;Sample_423:0/1;Sample_424:0/1;Sample_425:0/1;Sample_426:0/1;Sample_427:0/1;Sample_433:0/1;Sample_434:0/1;Sample_435:0/1;Sample_436:0/1;Sample_437:0/1;Sample_498:0/1;Sample_504:0/1;Sample_599:0/1;Sample_748:1/1;Sample_831:0/1;Sample_B-8274:0/1;Sample_B-8323:0/1	1	1359914	1359914	1	C	CCA	frameshift_variant	HIGH	CORT_0A06150	CPAR2_206800	orf19.6259	YCR035C	RRP43,	c.858_859insTG	p.Glu287fs	858/1086	286/361	(CORT_0A06150|CORT_0A06150|1|1.00)	similar to C. parapsilosis CPAR2_206800 and C. albicans orf19.6259similar to S. cerevisiae RRP43	;viable;	Exoribonuclease, phosphorolytic domain 1|NULL		TRUE
1_1359919_TCC_T	0.23094	0.357771	0.494975	0.2	0.2	0.447214	0.635085	0	0.2	0.694879	0.23094	0.141421	0.23094	0.54272	0.834058	0	0.4	0.4	0.2	0.453557	0.898146	0	Sample_151:0/1;Sample_1540:0/1;Sample_1799:0/1;Sample_1825:0/1;Sample_282:0/1;Sample_320:0/1;Sample_421:0/1;Sample_422:0/1;Sample_423:0/1;Sample_424:0/1;Sample_425:0/1;Sample_426:0/1;Sample_427:0/1;Sample_433:0/1;Sample_434:0/1;Sample_435:0/1;Sample_436:0/1;Sample_437:0/1;Sample_498:0/1;Sample_504:0/1;Sample_599:0/1;Sample_748:1/1;Sample_831:0/1;Sample_B-8274:0/1;Sample_B-8323:0/1	1	1359919	1359921	3	TCC	T	frameshift_variant	HIGH	CORT_0A06150	CPAR2_206800	orf19.6259	YCR035C	RRP43,	c.852_853delGG	p.Asp285fs	853/1086	284/361	(CORT_0A06150|CORT_0A06150|1|1.00)	similar to C. parapsilosis CPAR2_206800 and C. albicans orf19.6259similar to S. cerevisiae RRP43	;viable;	Exoribonuclease, phosphorolytic domain 1|NULL		TRUE
1_1376781_G_T	0.226455	0.350823	0.485363	0.196116	0.196116	0.438529	0.622752	0.196116	0.196116	0.681385	0.339683	0.138675	0.226455	0.532181	0.858754	0.138675	0.392232	0.392232	0.196116	0.518875	0.920737	0.196116	Sample_151:1/1;Sample_1540:1/1;Sample_1799:1/1;Sample_1825:1/1;Sample_185:1/1;Sample_282:0/1;Sample_320:0/1;Sample_421:1/1;Sample_422:1/1;Sample_423:1/1;Sample_424:0/1;Sample_425:0/1;Sample_426:0/1;Sample_427:0/1;Sample_433:1/1;Sample_434:1/1;Sample_435:0/1;Sample_436:0/1;Sample_437:1/1;Sample_498:0/1;Sample_504:0/1;Sample_599:1/1;Sample_748:1/1;Sample_831:0/1;Sample_B-8274:1/1;Sample_B-8323:0/1	1	1376781	1376781	1	G	T	stop_gained	HIGH	CORT_0A06210	CPAR2_206860	orf19.6247	YPR135W	CTF4,	c.1196C>A	p.Ser399*	1196/2508	399/835	character(0)	S. cerevisiae homolog CTF4 has chromatin binding and has role in DNA-dependent DNA replication, mitotic sister chromatid cohesion, replicative cell aging, double-strand break repair via break-induced replication	;haploinsufficient;|;haploinsufficient;|;haploinsufficient;	WD40/YVTN repeat-like-containing domain|WD40-repeat-containing domain|NULL	Molecular Function: protein binding (GO:0005515)|	FALSE
1_1396067_A_G	0.120386	0.0932505	0.368605	0	0	0.466252	0.662122	0.208514	0.208514	0.724462	0.361158	0	0	0.377217	0.782609	0.147442	0.417029	0.417029	0.208514	0.472866	0.893819	0.208514	Sample_151:1/1;Sample_1540:1/1;Sample_1825:1/1;Sample_185:1/1;Sample_282:0/1;Sample_320:0/1;Sample_421:1/1;Sample_422:1/1;Sample_424:0/1;Sample_425:1/1;Sample_426:1/1;Sample_427:1/1;Sample_433:1/1;Sample_435:1/1;Sample_436:1/1;Sample_437:1/1;Sample_498:0/1;Sample_504:1/1;Sample_599:1/1;Sample_748:1/1;Sample_831:1/1;Sample_B-8274:1/1;Sample_B-8323:1/1	1	1396067	1396067	1	A	G	stop_lost&splice_region_variant	HIGH	CORT_0A06290	CPAR2_206930	orf19.6230	YGL246C	RAI1,	c.1189T>C	p.Ter397Glnext*?	1189/1191	397/396	character(0)	similar to C. parapsilosis CPAR2_206930 and C. albicans orf19.6230similar to S. cerevisiae RAI1	;viable;	NULL|RAI1-like		FALSE
1_1398389_TTGTTGTTG_T	0.120386	0.0932505	0.368605	0	0	0.466252	0.662122	0.208514	0.208514	0.724462	0.361158	0	0	0.377217	0.782609	0.147442	0.417029	0.417029	0.208514	0.472866	0.893819	0.208514	Sample_151:0/1;Sample_1540:0/1;Sample_1825:0/1;Sample_185:0/1;Sample_282:0/1;Sample_320:0/1;Sample_421:0/1;Sample_422:0/1;Sample_424:0/1;Sample_425:1/1;Sample_426:1/1;Sample_427:1/1;Sample_433:0/1;Sample_435:1/1;Sample_436:1/1;Sample_437:0/1;Sample_498:0/1;Sample_504:1/1;Sample_599:0/1;Sample_748:1/1;Sample_831:1/1;Sample_B-8274:0/1;Sample_B-8323:1/1	1	1398389	1398397	9	TTGTTGTTG	T	frameshift_variant	HIGH	CORT_0A06310	CPAR2_206950	orf19.6232	YNL183C	NPR1,NPR1	c.2221_2228delCAACAACA	p.Gln741fs	2228/2556	741/851	(CORT_0A06310|CORT_0A06310|1|1.00)	predicted serine/threonine protein kinase, involved in regulation of ammonium transport	;viable;|ammonium;utilization of nitrogen source: decreased;|ammonium;nutrient uptake: decreased;|threonine;utilization of nitrogen source: decreased;|phenylalanine;utilization of nitrogen source: decreased;|;competitive fitness: normal;R\I score is the median log2(R/I) value representing abundance of the mutant in recovered pool relative to inoculum|;colony appearance: normal;Morphology (M) scor…	NULL|Serine/threonine-protein kinase, active site|Protein kinase-like domain|Protein kinase, catalytic domain|Protein kinase, ATP binding site	|Molecular Function: protein serine/threonine kinase activity (GO:0004674), Biological Process: protein phosphorylation (GO:0006468)|Molecular Function: transferase activity, transferring phosphorus-containing groups (GO:0016772)|Molecular Function: protein kinase activity (GO:0004672), Molecular Function: ATP binding (GO:0005524), Biological Process: protein phosphorylation (GO:0006468)|Molecula…	FALSE
1_1405314_CTA_C	0.120386	0.0932505	0.368605	0	0	0.466252	0.662122	0.208514	0.208514	0.724462	0.361158	0	0	0.377217	0.782609	0.147442	0.417029	0.417029	0.208514	0.472866	0.893819	0.208514	Sample_151:0/1;Sample_1540:0/1;Sample_1825:0/1;Sample_185:0/1;Sample_282:0/1;Sample_320:0/1;Sample_421:0/1;Sample_422:0/1;Sample_424:0/1;Sample_425:1/1;Sample_426:1/1;Sample_427:1/1;Sample_433:0/1;Sample_435:1/1;Sample_436:1/1;Sample_437:0/1;Sample_498:0/1;Sample_504:1/1;Sample_599:0/1;Sample_748:1/1;Sample_831:1/1;Sample_B-8274:0/1;Sample_B-8323:1/1	1	1405314	1405316	3	CTA	C	frameshift_variant	HIGH	CORT_0A06340	CPAR2_206980	---	---		c.155_156delTA	p.Leu52fs	156/441	52/146	(CORT_0A06340|CORT_0A06340|1|1.00)	hypothetical protein	NA	NA	NA	TRUE
1_1405317_A_AGG	0.120386	0.0932505	0.368605	0	0	0.466252	0.662122	0.208514	0.208514	0.724462	0.361158	0	0	0.377217	0.782609	0.147442	0.417029	0.417029	0.208514	0.472866	0.893819	0.208514	Sample_151:0/1;Sample_1540:0/1;Sample_1825:0/1;Sample_185:0/1;Sample_282:0/1;Sample_320:0/1;Sample_421:0/1;Sample_422:0/1;Sample_424:0/1;Sample_425:1/1;Sample_426:1/1;Sample_427:1/1;Sample_433:0/1;Sample_435:1/1;Sample_436:1/1;Sample_437:0/1;Sample_498:0/1;Sample_504:1/1;Sample_599:0/1;Sample_748:1/1;Sample_831:1/1;Sample_B-8274:0/1;Sample_B-8323:1/1	1	1405317	1405317	1	A	AGG	frameshift_variant	HIGH	CORT_0A06340	CPAR2_206980	---	---		c.153_154insCC	p.Leu52fs	153/441	51/146	(CORT_0A06340|CORT_0A06340|1|1.00)	hypothetical protein	NA	NA	NA	TRUE
1_1409023_TCC_T	0.333333	0.430331	0.544331	0.19245	0.19245	0.430331	0.611111	0.19245	0.19245	0.668648	0.333333	0.272166	0.333333	0.580259	0.88283	0.136083	0.3849	0.3849	0.19245	0.509175	0.942809	0.19245	Sample_151:0/1;Sample_1540:0/1;Sample_1799:0/1;Sample_1825:0/1;Sample_185:0/1;Sample_282:0/1;Sample_320:0/1;Sample_421:0/1;Sample_422:0/1;Sample_423:0/1;Sample_424:0/1;Sample_425:0/1;Sample_426:0/1;Sample_427:0/1;Sample_428:0/1;Sample_433:0/1;Sample_434:0/1;Sample_435:0/1;Sample_436:0/1;Sample_437:0/1;Sample_498:0/1;Sample_504:0/1;Sample_599:0/1;Sample_748:0/1;Sample_831:0/1;Sample_B-8274:0/1;Sam…	1	1409023	1409025	3	TCC	T	frameshift_variant	HIGH	CORT_0A06360	CPAR2_207000	---	---		c.72_73delGG	p.Asp25fs	73/1320	24/439	(CORT_0A06360|CORT_0A06360|1|1.00)	hypothetical protein	NA	NULL|Enolase|Enolase, N-terminal|Enolase, conserved site|Enolase, C-terminal	|Cellular Component: phosphopyruvate hydratase complex (GO:0000015), Molecular Function: magnesium ion binding (GO:0000287), Molecular Function: phosphopyruvate hydratase activity (GO:0004634), Biological Process: glycolysis (GO:0006096)	FALSE
1_1413301_CT_C	0.120386	0.0932505	0.368605	0	0	0.466252	0.662122	0.208514	0.208514	0.724462	0.361158	0	0	0.377217	0.782609	0.147442	0.417029	0.417029	0.208514	0.472866	0.893819	0.208514	Sample_151:1/1;Sample_1540:1/1;Sample_1825:1/1;Sample_185:1/1;Sample_282:0/1;Sample_320:0/1;Sample_421:1/1;Sample_422:1/1;Sample_424:0/1;Sample_425:1/1;Sample_426:1/1;Sample_427:1/1;Sample_433:1/1;Sample_435:1/1;Sample_436:1/1;Sample_437:1/1;Sample_498:0/1;Sample_504:1/1;Sample_599:1/1;Sample_748:1/1;Sample_831:1/1;Sample_B-8274:1/1;Sample_B-8323:1/1	1	1413301	1413302	2	CT	C	frameshift_variant	HIGH	CORT_0A06390	CPAR2_207030	orf19.6238	---		c.1005delT	p.Asp336fs	1005/1203	335/400	(CORT_0A06390|CORT_0A06390|1|1.00)	hypothetical protein	;viable;|;colony appearance: normal;Morphology (M) score represents relative sizes of central and peripheral regions of colony|;vegetative growth: normal rate;|;viable;|;competitive fitness: normal;R\I score is the median log2(R/I) value representing abundance of the mutant in recovered pool relative to inoculum	NULL|FAD dependent oxidoreductase	|Molecular Function: oxidoreductase activity (GO:0016491), Biological Process: oxidation-reduction process (GO:0055114)	TRUE
1_1413304_A_AG	0.120386	0.0932505	0.368605	0	0	0.466252	0.662122	0.208514	0.208514	0.724462	0.361158	0	0	0.377217	0.782609	0.147442	0.417029	0.417029	0.208514	0.472866	0.893819	0.208514	Sample_151:1/1;Sample_1540:1/1;Sample_1825:1/1;Sample_185:1/1;Sample_282:0/1;Sample_320:0/1;Sample_421:1/1;Sample_422:1/1;Sample_424:0/1;Sample_425:1/1;Sample_426:1/1;Sample_427:1/1;Sample_433:1/1;Sample_435:1/1;Sample_436:1/1;Sample_437:1/1;Sample_498:0/1;Sample_504:1/1;Sample_599:1/1;Sample_748:1/1;Sample_831:1/1;Sample_B-8274:1/1;Sample_B-8323:1/1	1	1413304	1413304	1	A	AG	frameshift_variant	HIGH	CORT_0A06390	CPAR2_207030	orf19.6238	---		c.1007_1008insG	p.Asp336fs	1008/1203	336/400	(CORT_0A06390|CORT_0A06390|1|1.00)	hypothetical protein	;viable;|;colony appearance: normal;Morphology (M) score represents relative sizes of central and peripheral regions of colony|;vegetative growth: normal rate;|;viable;|;competitive fitness: normal;R\I score is the median log2(R/I) value representing abundance of the mutant in recovered pool relative to inoculum	NULL|FAD dependent oxidoreductase	|Molecular Function: oxidoreductase activity (GO:0016491), Biological Process: oxidation-reduction process (GO:0055114)	TRUE
1_1430957_CATAT_C	0.120386	0.0932505	0.368605	0	0	0.466252	0.662122	0.208514	0.208514	0.724462	0.361158	0	0	0.377217	0.782609	0.147442	0.417029	0.417029	0.208514	0.472866	0.893819	0.208514	Sample_151:0/1;Sample_1540:0/1;Sample_1825:0/1;Sample_185:0/1;Sample_282:0/1;Sample_320:0/1;Sample_421:0/1;Sample_422:0/1;Sample_424:0/1;Sample_425:1/1;Sample_426:1/1;Sample_427:1/1;Sample_433:0/1;Sample_435:1/1;Sample_436:1/1;Sample_437:0/1;Sample_498:0/1;Sample_504:1/1;Sample_599:0/1;Sample_748:0/1;Sample_831:1/1;Sample_B-8274:0/1;Sample_B-8323:1/1	1	1430957	1430961	5	CATAT	C	frameshift_variant&start_lost	HIGH	CORT_0A06430	CPAR2_207080	orf19.385	YMR189W	GCV2,GCV2,GCV2	c.-2_2delATAT	p.Met1fs	3135-02-01	1/1044	(CORT_0A06430|CORT_0A06430|1|1.00)	glycine decarboxylase subunit P	;viable;	Glycine cleavage system P-protein, N-terminal|Pyridoxal phosphate-dependent transferase, major domain|NULL|Glycine cleavage system P protein, homodimeric|Glycine cleavage system P protein|Pyridoxal phosphate-dependent transferase, major region, subdomain 1	Molecular Function: glycine dehydrogenase (decarboxylating) activity (GO:0004375), Biological Process: glycine catabolic process (GO:0006546), Biological Process: oxidation-reduction process (GO:0055114)||Molecular Function: glycine dehydrogenase (decarboxylating) activity (GO:0004375), Biological Process: glycine metabolic process (GO:0006544), Biological Process: oxidation-reduction process (GO…	FALSE
1_1431807_T_TC	0.120386	0.0932505	0.368605	0	0	0.466252	0.662122	0.208514	0.208514	0.724462	0.361158	0	0	0.377217	0.782609	0.147442	0.417029	0.417029	0.208514	0.472866	0.893819	0.208514	Sample_151:0/1;Sample_1540:0/1;Sample_1825:0/1;Sample_185:0/1;Sample_282:0/1;Sample_320:0/1;Sample_421:0/1;Sample_422:0/1;Sample_424:0/1;Sample_425:1/1;Sample_426:1/1;Sample_427:1/1;Sample_433:0/1;Sample_435:1/1;Sample_436:1/1;Sample_437:0/1;Sample_498:0/1;Sample_504:1/1;Sample_599:0/1;Sample_748:0/1;Sample_831:1/1;Sample_B-8274:0/1;Sample_B-8323:1/1	1	1431807	1431807	1	T	TC	frameshift_variant&splice_region_variant	HIGH	CORT_0A06440	CPAR2_207090	orf19.857	---	FMO2	c.1649_1650insG		1649/1650	550/549	character(0)	hypothetical protein	;viable;	NULL		FALSE
1_1451548_TG_T	0.226455	0.350823	0.485363	0.196116	0.196116	0.438529	0.622752	0.196116	0.196116	0.681385	0.339683	0.138675	0.226455	0.532181	0.858754	0.138675	0.392232	0.392232	0.196116	0.518875	0.920737	0.196116	Sample_151:0/1;Sample_1540:0/1;Sample_1799:1/1;Sample_1825:0/1;Sample_185:0/1;Sample_282:0/1;Sample_320:0/1;Sample_421:0/1;Sample_422:0/1;Sample_423:1/1;Sample_424:0/1;Sample_425:1/1;Sample_426:1/1;Sample_427:1/1;Sample_433:0/1;Sample_434:1/1;Sample_435:1/1;Sample_436:1/1;Sample_437:0/1;Sample_498:0/1;Sample_504:1/1;Sample_599:0/1;Sample_748:0/1;Sample_831:1/1;Sample_B-8274:0/1;Sample_B-8323:1/1	1	1451548	1451549	2	TG	T	frameshift_variant	HIGH	CORT_0A06530	---	---	---		c.373delC	p.Gln125fs	373/393	125/130	character(0)	CDS	NA	NA	NA	FALSE
1_1460137_CT_C	0.235702	0.365148	0.433013	0.204124	0.204124	0.365148	0.53033	0.204124	0.204124	0.600099	0.353553	0.144338	0.235702	0.553912	0.808694	0.144338	0.306186	0.306186	0	0.385758	0.875	0.204124	Sample_151:0/1;Sample_1540:0/1;Sample_1799:0/1;Sample_1825:0/1;Sample_185:0/1;Sample_282:0/1;Sample_320:0/1;Sample_421:0/1;Sample_422:0/1;Sample_423:0/1;Sample_424:0/1;Sample_426:0/1;Sample_427:0/1;Sample_433:0/1;Sample_434:0/1;Sample_435:0/1;Sample_436:0/1;Sample_437:0/1;Sample_498:0/1;Sample_504:0/1;Sample_599:0/1;Sample_748:0/1;Sample_831:0/1;Sample_B-8274:0/1	1	1460137	1460138	2	CT	C	frameshift_variant	HIGH	CORT_0A06610	CPAR2_207270	---	---		c.114delT	p.Arg40fs	114/1578	38/525	(CORT_0A06610|CORT_0A06610|1|1.00)	hypothetical protein	NA	NULL|Major facilitator superfamily|Major facilitator superfamily domain, general substrate transporter	|Cellular Component: integral to membrane (GO:0016021), Biological Process: transmembrane transport (GO:0055085)	FALSE
1_1461470_C_CA	0	0	0.353553	0	0	0.447214	0.288675	0	0	0.267261	0	0	0	0	0.208514	0	0.5	0.5	1	0.377964	0.204124	0	Sample_425:1/1	1	1461470	1461470	1	C	CA	frameshift_variant	HIGH	CORT_0A06610	CPAR2_207270	---	---		c.1447dupA	p.Ile483fs	1448/1578	483/525	(CORT_0A06610|CORT_0A06610|1|1.00)	hypothetical protein	NA	NULL|Major facilitator superfamily|Major facilitator superfamily domain, general substrate transporter	|Cellular Component: integral to membrane (GO:0016021), Biological Process: transmembrane transport (GO:0055085)	FALSE
1_1462543_G_GT	0.23094	0.357771	0.494975	0.2	0.2	0.447214	0.57735	0.2	0.2	0.641427	0.34641	0.141421	0.23094	0.54272	0.834058	0.141421	0.4	0.4	0.2	0.453557	0.898146	0.2	Sample_151:0/1;Sample_1540:0/1;Sample_1799:1/1;Sample_1825:0/1;Sample_185:0/1;Sample_282:0/1;Sample_320:0/1;Sample_421:0/1;Sample_422:0/1;Sample_423:1/1;Sample_424:0/1;Sample_425:1/1;Sample_426:0/1;Sample_427:0/1;Sample_433:0/1;Sample_434:1/1;Sample_435:0/1;Sample_436:0/1;Sample_437:0/1;Sample_498:0/1;Sample_504:0/1;Sample_599:0/1;Sample_748:0/1;Sample_831:0/1;Sample_B-8274:0/1	1	1462543	1462543	1	G	GT	frameshift_variant	HIGH	CORT_0A06620	CPAR2_207280	orf19.391	YDR213W	UPC2,UPC2,UPC2	c.49_50insT	p.Gly17fs	50/2529	17/842	character(0)	transcriptional regulator of ergosterol biosynthetic genes and sterol uptake	fluconazole;resistance to chemicals: decreased;severely sensitive|ketoconazole;resistance to chemicals: decreased;|ketoconazole;resistance to chemicals: increased;|fenpropimorph;resistance to chemicals: decreased;|fenpropimorph;resistance to chemicals: decreased;strongly sensitive|itraconazole;resistance to chemicals: decreased;|;viable;|;viable;|;viable;|;viable;|fluconazole;resistance to chemic…	Zn(2)-C6 fungal-type DNA-binding domain|Protein of unknown function DUF3468	Molecular Function: sequence-specific DNA binding RNA polymerase II transcription factor activity (GO:0000981), Cellular Component: nucleus (GO:0005634), Biological Process: regulation of transcription, DNA-dependent (GO:0006355), Molecular Function: zinc ion binding (GO:0008270)|	TRUE
1_1462544_G_GAAAGAGGA	0.23094	0.357771	0.494975	0.2	0.2	0.447214	0.57735	0.2	0.2	0.641427	0.34641	0.141421	0.23094	0.54272	0.834058	0.141421	0.4	0.4	0.2	0.453557	0.898146	0.2	Sample_151:0/1;Sample_1540:0/1;Sample_1799:1/1;Sample_1825:0/1;Sample_185:0/1;Sample_282:0/1;Sample_320:0/1;Sample_421:0/1;Sample_422:0/1;Sample_423:1/1;Sample_424:0/1;Sample_425:1/1;Sample_426:0/1;Sample_427:0/1;Sample_433:0/1;Sample_434:1/1;Sample_435:0/1;Sample_436:0/1;Sample_437:0/1;Sample_498:0/1;Sample_504:0/1;Sample_599:0/1;Sample_748:0/1;Sample_831:0/1;Sample_B-8274:0/1	1	1462544	1462544	1	G	GAAAGAGGA	frameshift_variant	HIGH	CORT_0A06620	CPAR2_207280	orf19.391	YDR213W	UPC2,UPC2,UPC2	c.53_54insGAGGAAAA	p.Glu19fs	54/2529	18/842	character(0)	transcriptional regulator of ergosterol biosynthetic genes and sterol uptake	fluconazole;resistance to chemicals: decreased;severely sensitive|ketoconazole;resistance to chemicals: decreased;|ketoconazole;resistance to chemicals: increased;|fenpropimorph;resistance to chemicals: decreased;|fenpropimorph;resistance to chemicals: decreased;strongly sensitive|itraconazole;resistance to chemicals: decreased;|;viable;|;viable;|;viable;|;viable;|fluconazole;resistance to chemic…	Zn(2)-C6 fungal-type DNA-binding domain|Protein of unknown function DUF3468	Molecular Function: sequence-specific DNA binding RNA polymerase II transcription factor activity (GO:0000981), Cellular Component: nucleus (GO:0005634), Biological Process: regulation of transcription, DNA-dependent (GO:0006355), Molecular Function: zinc ion binding (GO:0008270)|	TRUE
1_1475651_T_TGTGAG	0.226455	0.350823	0.485363	0.196116	0.196116	0.438529	0.622752	0.196116	0.196116	0.681385	0.339683	0.138675	0.226455	0.532181	0.858754	0.138675	0.392232	0.392232	0.196116	0.518875	0.920737	0.196116	Sample_151:0/1;Sample_1540:0/1;Sample_1799:1/1;Sample_1825:0/1;Sample_185:0/1;Sample_282:0/1;Sample_320:0/1;Sample_421:0/1;Sample_422:0/1;Sample_423:1/1;Sample_424:0/1;Sample_425:1/1;Sample_426:1/1;Sample_427:1/1;Sample_433:0/1;Sample_434:1/1;Sample_435:1/1;Sample_436:1/1;Sample_437:0/1;Sample_498:0/1;Sample_504:1/1;Sample_599:0/1;Sample_748:0/1;Sample_831:1/1;Sample_B-8274:0/1;Sample_B-8323:1/1	1	1475651	1475651	1	T	TGTGAG	frameshift_variant	HIGH	CORT_0A06660	CPAR2_207310	orf19.4909	YNL161W	CBK1,CBK1	c.667_668insCTCAC	p.Gln223fs	667/2280	223/759	(CORT_0A06660|CORT_0A06660|1|1.00)	Ser/Thr kinase of cell wall integrity pathway	;flocculation: increased;|Calcofluor White;resistance to chemicals: decreased;|itraconazole;resistance to chemicals: decreased;sensitivity is intermediate between that of the homozygous null mutant and wild type|itraconazole;resistance to chemicals: decreased;|sodium dodecyl sulfate;resistance to chemicals: decreased;|;vegetative growth: decreased rate;|;viable;heterozygous deletion|;viable;|;via…	AGC-kinase, C-terminal|Serine/threonine-protein kinase, active site|NULL|Protein kinase-like domain|Protein kinase, catalytic domain|Protein kinase, ATP binding site|Protein kinase, C-terminal|Serine/threonine- / dual-specificity protein kinase, catalytic domain	Molecular Function: protein serine/threonine kinase activity (GO:0004674), Molecular Function: ATP binding (GO:0005524), Biological Process: protein phosphorylation (GO:0006468)|Molecular Function: protein serine/threonine kinase activity (GO:0004674), Biological Process: protein phosphorylation (GO:0006468)||Molecular Function: transferase activity, transferring phosphorus-containing groups (GO:…	TRUE
1_1475653_C_CCTGTCCTTGTTGT	0.226455	0.350823	0.485363	0.196116	0.196116	0.438529	0.622752	0.196116	0.196116	0.681385	0.339683	0.138675	0.226455	0.532181	0.858754	0.138675	0.392232	0.392232	0.196116	0.518875	0.920737	0.196116	Sample_151:0/1;Sample_1540:0/1;Sample_1799:1/1;Sample_1825:0/1;Sample_185:0/1;Sample_282:0/1;Sample_320:0/1;Sample_421:0/1;Sample_422:0/1;Sample_423:1/1;Sample_424:0/1;Sample_425:1/1;Sample_426:1/1;Sample_427:1/1;Sample_433:0/1;Sample_434:1/1;Sample_435:1/1;Sample_436:1/1;Sample_437:0/1;Sample_498:0/1;Sample_504:1/1;Sample_599:0/1;Sample_748:0/1;Sample_831:1/1;Sample_B-8274:0/1;Sample_B-8323:1/1	1	1475653	1475653	1	C	CCTGTCCTTGTTGT	frameshift_variant	HIGH	CORT_0A06660	CPAR2_207310	orf19.4909	YNL161W	CBK1,CBK1	c.665_666insACAACAAGGACAG	p.Pro224fs	665/2280	222/759	(CORT_0A06660|CORT_0A06660|1|1.00)	Ser/Thr kinase of cell wall integrity pathway	;flocculation: increased;|Calcofluor White;resistance to chemicals: decreased;|itraconazole;resistance to chemicals: decreased;sensitivity is intermediate between that of the homozygous null mutant and wild type|itraconazole;resistance to chemicals: decreased;|sodium dodecyl sulfate;resistance to chemicals: decreased;|;vegetative growth: decreased rate;|;viable;heterozygous deletion|;viable;|;via…	AGC-kinase, C-terminal|Serine/threonine-protein kinase, active site|NULL|Protein kinase-like domain|Protein kinase, catalytic domain|Protein kinase, ATP binding site|Protein kinase, C-terminal|Serine/threonine- / dual-specificity protein kinase, catalytic domain	Molecular Function: protein serine/threonine kinase activity (GO:0004674), Molecular Function: ATP binding (GO:0005524), Biological Process: protein phosphorylation (GO:0006468)|Molecular Function: protein serine/threonine kinase activity (GO:0004674), Biological Process: protein phosphorylation (GO:0006468)||Molecular Function: transferase activity, transferring phosphorus-containing groups (GO:…	TRUE
1_1479949_G_A	0.226455	0.350823	0.485363	0.196116	0.196116	0.438529	0.622752	0.196116	0.196116	0.681385	0.339683	0.138675	0.226455	0.532181	0.858754	0.138675	0.392232	0.392232	0.196116	0.518875	0.920737	0.196116	Sample_151:0/1;Sample_1540:0/1;Sample_1799:1/1;Sample_1825:0/1;Sample_185:0/1;Sample_282:0/1;Sample_320:0/1;Sample_421:0/1;Sample_422:0/1;Sample_423:1/1;Sample_424:0/1;Sample_425:0/1;Sample_426:0/1;Sample_427:0/1;Sample_433:0/1;Sample_434:1/1;Sample_435:0/1;Sample_436:0/1;Sample_437:0/1;Sample_498:0/1;Sample_504:0/1;Sample_599:0/1;Sample_748:0/1;Sample_831:0/1;Sample_B-8274:0/1;Sample_B-8323:0/1	1	1479949	1479949	1	G	A	start_lost	HIGH	CORT_0A06690	CPAR2_207340	orf19.4911	---		c.3G>A	p.Met1?	3/1083	1/360	(CORT_0A06690|CORT_0A06690|1|1.00)	hypothetical protein	NA	NA	NA	FALSE
1_1480036_TGA_T	0.226455	0.350823	0.485363	0.196116	0.196116	0.438529	0.622752	0.196116	0.196116	0.681385	0.339683	0.138675	0.226455	0.532181	0.858754	0.138675	0.392232	0.392232	0.196116	0.518875	0.920737	0.196116	Sample_151:0/1;Sample_1540:0/1;Sample_1799:1/1;Sample_1825:0/1;Sample_185:0/1;Sample_282:0/1;Sample_320:0/1;Sample_421:0/1;Sample_422:0/1;Sample_423:1/1;Sample_424:0/1;Sample_425:0/1;Sample_426:0/1;Sample_427:0/1;Sample_433:0/1;Sample_434:1/1;Sample_435:0/1;Sample_436:0/1;Sample_437:0/1;Sample_498:0/1;Sample_504:0/1;Sample_599:0/1;Sample_748:0/1;Sample_831:0/1;Sample_B-8274:0/1;Sample_B-8323:0/1	1	1480036	1480038	3	TGA	T	frameshift_variant	HIGH	CORT_0A06690	CPAR2_207340	orf19.4911	---		c.91_92delGA	p.Glu31fs	91/1083	31/360	(CORT_0A06690|CORT_0A06690|1|1.00)	hypothetical protein	NA	NA	NA	TRUE
1_1480039_A_ATG	0.226455	0.350823	0.485363	0.196116	0.196116	0.438529	0.622752	0.196116	0.196116	0.681385	0.339683	0.138675	0.226455	0.532181	0.858754	0.138675	0.392232	0.392232	0.196116	0.518875	0.920737	0.196116	Sample_151:0/1;Sample_1540:0/1;Sample_1799:1/1;Sample_1825:0/1;Sample_185:0/1;Sample_282:0/1;Sample_320:0/1;Sample_421:0/1;Sample_422:0/1;Sample_423:1/1;Sample_424:0/1;Sample_425:0/1;Sample_426:0/1;Sample_427:0/1;Sample_433:0/1;Sample_434:1/1;Sample_435:0/1;Sample_436:0/1;Sample_437:0/1;Sample_498:0/1;Sample_504:0/1;Sample_599:0/1;Sample_748:0/1;Sample_831:0/1;Sample_B-8274:0/1;Sample_B-8323:0/1	1	1480039	1480039	1	A	ATG	frameshift_variant	HIGH	CORT_0A06690	CPAR2_207340	orf19.4911	---		c.93_94insTG	p.His32fs	94/1083	32/360	(CORT_0A06690|CORT_0A06690|1|1.00)	hypothetical protein	NA	NA	NA	TRUE
1_1493434_TGG_T	0.57735	0.447214	0	1	1	0	0	0	0	0	0	0	0.57735	0.301511	0.208514	0	0	0	0	0	0.204124	0	Sample_423:0/1	1	1493434	1493436	3	TGG	T	frameshift_variant	HIGH	CORT_0A06770	CPAR2_207420	orf19.5100	---	MLT1	c.4436_4437delCC	p.Ala1479fs	4437/4824	1479/1607	(CORT_0A06770|CORT_0A06770|1|1.00)	vacuolar membrane transporter: MRP subfamily of ABC family	;viable;|;viable;|;filamentous growth: increased;transposon insertion proximal to, but not within, the ORF|;viable;|;viable;|;viable;|;virulence: decreased;decreased host liver cell damage, measured as alanine aminotransferase released after hyphal invasion	ABC transporter, integral membrane type 1|NULL|ABC transporter-like|ABC transporter, conserved site|AAA+ ATPase domain|ABC transporter, transmembrane domain, type 1|ABC transporter, transmembrane domain	|Molecular Function: ATP binding (GO:0005524), Molecular Function: ATPase activity (GO:0016887)|Molecular Function: nucleotide binding (GO:0000166), Molecular Function: nucleoside-triphosphatase activity (GO:0017111)|Molecular Function: ATP binding (GO:0005524), Biological Process: transport (GO:0006810), Cellular Component: integral to membrane (GO:0016021), Molecular Function: ATPase activity, …	TRUE
1_1493440_C_CCT	0.57735	0.447214	0	1	1	0	0	0	0	0	0	0	0.57735	0.301511	0.208514	0	0	0	0	0	0.204124	0	Sample_423:0/1	1	1493440	1493440	1	C	CCT	frameshift_variant	HIGH	CORT_0A06770	CPAR2_207420	orf19.5100	---	MLT1	c.4431_4432insAG	p.Glu1478fs	4431/4824	1477/1607	(CORT_0A06770|CORT_0A06770|1|1.00)	vacuolar membrane transporter: MRP subfamily of ABC family	;viable;|;viable;|;filamentous growth: increased;transposon insertion proximal to, but not within, the ORF|;viable;|;viable;|;viable;|;virulence: decreased;decreased host liver cell damage, measured as alanine aminotransferase released after hyphal invasion	ABC transporter, integral membrane type 1|NULL|ABC transporter-like|ABC transporter, conserved site|AAA+ ATPase domain|ABC transporter, transmembrane domain, type 1|ABC transporter, transmembrane domain	|Molecular Function: ATP binding (GO:0005524), Molecular Function: ATPase activity (GO:0016887)|Molecular Function: nucleotide binding (GO:0000166), Molecular Function: nucleoside-triphosphatase activity (GO:0017111)|Molecular Function: ATP binding (GO:0005524), Biological Process: transport (GO:0006810), Cellular Component: integral to membrane (GO:0016021), Molecular Function: ATPase activity, …	TRUE
1_1571014_T_TA	0.226455	0.350823	0.485363	0.196116	0.196116	0.438529	0.622752	0.196116	0.196116	0.681385	0.339683	0.138675	0.226455	0.532181	0.858754	0.138675	0.392232	0.392232	0.196116	0.518875	0.920737	0.196116	Sample_151:1/1;Sample_1540:1/1;Sample_1799:0/1;Sample_1825:1/1;Sample_185:1/1;Sample_282:0/1;Sample_320:0/1;Sample_421:1/1;Sample_422:1/1;Sample_423:0/1;Sample_424:0/1;Sample_425:1/1;Sample_426:1/1;Sample_427:1/1;Sample_433:1/1;Sample_434:0/1;Sample_435:1/1;Sample_436:1/1;Sample_437:1/1;Sample_498:0/1;Sample_504:1/1;Sample_599:1/1;Sample_748:0/1;Sample_831:1/1;Sample_B-8274:1/1;Sample_B-8323:1/1	1	1571014	1571014	1	T	TA	frameshift_variant	HIGH	CORT_0A07090	CPAR2_207740	orf19.1467	YGL191W	,COX13	c.8dupT	p.Leu3fs	8/504	3/167	character(0)	cytochrome c oxidase	NA	Cytochrome c oxidase, subunit VIa|Cytochrome c oxidase, subunit VIa, conserved site	Molecular Function: cytochrome-c oxidase activity (GO:0004129), Cellular Component: mitochondrial inner membrane (GO:0005743), Cellular Component: mitochondrial respiratory chain complex IV (GO:0005751)	FALSE
1_1575519_A_G	0.23094	0.268328	0.424264	0.2	0.2	0.447214	0.635085	0.2	0.2	0.694879	0.34641	0.141421	0.23094	0.482418	0.834058	0.141421	0.4	0.4	0.2	0.52915	0.938971	0.2	Sample_151:1/1;Sample_1540:1/1;Sample_1799:0/1;Sample_1825:1/1;Sample_185:1/1;Sample_282:0/1;Sample_320:0/1;Sample_421:1/1;Sample_422:1/1;Sample_423:0/1;Sample_424:0/1;Sample_425:1/1;Sample_426:1/1;Sample_427:1/1;Sample_433:1/1;Sample_435:1/1;Sample_436:1/1;Sample_437:1/1;Sample_498:0/1;Sample_504:1/1;Sample_599:1/1;Sample_748:0/1;Sample_831:1/1;Sample_B-8274:1/1;Sample_B-8323:1/1	1	1575519	1575519	1	A	G	stop_lost&splice_region_variant	HIGH	CORT_0A07110	CPAR2_207760	---	---		c.799T>C	p.Ter267Glnext*?	799/801	267/266	character(0)	hypothetical protein	NA	NA	NA	FALSE
1_1576345_T_G	0.333333	0.430331	0.544331	0.19245	0.19245	0.430331	0.611111	0.19245	0.19245	0.668648	0.333333	0.272166	0.333333	0.580259	0.88283	0.136083	0.3849	0.3849	0.19245	0.509175	0.942809	0.19245	Sample_151:1/1;Sample_1540:1/1;Sample_1799:1/1;Sample_1825:1/1;Sample_185:1/1;Sample_282:1/1;Sample_320:1/1;Sample_421:1/1;Sample_422:1/1;Sample_423:1/1;Sample_424:1/1;Sample_425:1/1;Sample_426:1/1;Sample_427:1/1;Sample_428:1/1;Sample_433:1/1;Sample_434:1/1;Sample_435:1/1;Sample_436:1/1;Sample_437:1/1;Sample_498:1/1;Sample_504:1/1;Sample_599:1/1;Sample_748:1/1;Sample_831:1/1;Sample_B-8274:1/1;Sam…	1	1576345	1576345	1	T	G	stop_lost&splice_region_variant	HIGH	CORT_0A07120	---	---	---		c.1242A>C	p.Ter414Tyrext*?	1242/1242	414/413	character(0)	hypothetical protein	NA	LicD		FALSE
1_1576437_CA_C	0	0	0.353553	0	0	0.447214	0.288675	0	0	0.267261	0	0	0	0	0.208514	0	0.5	0.5	1	0.377964	0.204124	0	Sample_425:0/1	1	1576437	1576438	2	CA	C	frameshift_variant	HIGH	CORT_0A07120	---	---	---		c.1149delT	p.Ala384fs	1149/1242	383/413	(CORT_0A07120|CORT_0A07120|1|1.00)	hypothetical protein	NA	LicD		FALSE
1_1577602_T_C	0.333333	0.430331	0.544331	0.19245	0.19245	0.430331	0.611111	0.19245	0.19245	0.668648	0.333333	0.272166	0.333333	0.580259	0.88283	0.136083	0.3849	0.3849	0.19245	0.509175	0.942809	0.19245	Sample_151:1/1;Sample_1540:1/1;Sample_1799:1/1;Sample_1825:1/1;Sample_185:1/1;Sample_282:1/1;Sample_320:1/1;Sample_421:1/1;Sample_422:1/1;Sample_423:1/1;Sample_424:1/1;Sample_425:1/1;Sample_426:1/1;Sample_427:1/1;Sample_428:1/1;Sample_433:1/1;Sample_434:1/1;Sample_435:1/1;Sample_436:1/1;Sample_437:1/1;Sample_498:1/1;Sample_504:1/1;Sample_599:1/1;Sample_748:1/1;Sample_831:1/1;Sample_B-8274:1/1;Sam…	1	1577602	1577602	1	T	C	stop_lost&splice_region_variant	HIGH	CORT_0A07130	---	---	---		c.501A>G	p.Ter167Trpext*?	501/501	167/166	character(0)	hypothetical protein	NA	NULL		FALSE
1_1579594_C_A	0.120386	0.0932505	0.368605	0	0	0.466252	0.662122	0.208514	0.208514	0.724462	0.361158	0	0	0.377217	0.782609	0.147442	0.417029	0.417029	0.208514	0.472866	0.893819	0.208514	Sample_151:1/1;Sample_1540:1/1;Sample_1825:1/1;Sample_185:1/1;Sample_282:0/1;Sample_320:0/1;Sample_421:1/1;Sample_422:1/1;Sample_424:0/1;Sample_425:1/1;Sample_426:1/1;Sample_427:1/1;Sample_433:1/1;Sample_435:1/1;Sample_436:1/1;Sample_437:1/1;Sample_498:0/1;Sample_504:1/1;Sample_599:1/1;Sample_748:0/1;Sample_831:1/1;Sample_B-8274:1/1;Sample_B-8323:1/1	1	1579594	1579594	1	C	A	stop_gained	HIGH	CORT_0A07140	CPAR2_207770	orf19.851	---		c.2410G>T	p.Glu804*	2410/2430	804/809	character(0)	protein of unknown function	;viable;|;invasive growth: decreased;	LicD|NULL		FALSE
1_1595248_CGGCA_C	0.226455	0.350823	0.485363	0.196116	0.196116	0.438529	0.622752	0.196116	0.196116	0.681385	0.339683	0.138675	0.226455	0.532181	0.858754	0.138675	0.392232	0.392232	0.196116	0.518875	0.920737	0.196116	Sample_151:1/1;Sample_1540:1/1;Sample_1799:0/1;Sample_1825:1/1;Sample_185:1/1;Sample_282:0/1;Sample_320:0/1;Sample_421:1/1;Sample_422:1/1;Sample_423:0/1;Sample_424:0/1;Sample_425:1/1;Sample_426:1/1;Sample_427:1/1;Sample_433:1/1;Sample_434:0/1;Sample_435:1/1;Sample_436:1/1;Sample_437:1/1;Sample_498:0/1;Sample_504:1/1;Sample_599:1/1;Sample_748:0/1;Sample_831:1/1;Sample_B-8274:1/1;Sample_B-8323:1/1	1	1595248	1595252	5	CGGCA	C	frameshift_variant	HIGH	CORT_0A07170	CPAR2_207850	orf19.671	YDR505C	,PSP1	c.991_994delGGCA	p.Gly331fs	991/2169	331/722	(CORT_0A07170|CORT_0A07170|1|1.00)	protein repressed during the mating process in C. albicans	NA	NULL|PSP1, C-terminal		TRUE
1_1595254_G_GTATT	0.226455	0.350823	0.485363	0.196116	0.196116	0.438529	0.622752	0.196116	0.196116	0.681385	0.339683	0.138675	0.226455	0.532181	0.858754	0.138675	0.392232	0.392232	0.196116	0.518875	0.920737	0.196116	Sample_151:1/1;Sample_1540:1/1;Sample_1799:0/1;Sample_1825:1/1;Sample_185:1/1;Sample_282:0/1;Sample_320:0/1;Sample_421:1/1;Sample_422:1/1;Sample_423:0/1;Sample_424:0/1;Sample_425:1/1;Sample_426:1/1;Sample_427:1/1;Sample_433:1/1;Sample_434:0/1;Sample_435:1/1;Sample_436:1/1;Sample_437:1/1;Sample_498:0/1;Sample_504:1/1;Sample_599:1/1;Sample_748:0/1;Sample_831:1/1;Sample_B-8274:1/1;Sample_B-8323:1/1	1	1595254	1595254	1	G	GTATT	frameshift_variant	HIGH	CORT_0A07170	CPAR2_207850	orf19.671	YDR505C	,PSP1	c.996_997insTATT	p.Ala333fs	997/2169	333/722	(CORT_0A07170|CORT_0A07170|1|1.00)	protein repressed during the mating process in C. albicans	NA	NULL|PSP1, C-terminal		TRUE
1_1600852_T_TA	0.226455	0.350823	0.485363	0.196116	0.196116	0.438529	0.622752	0.196116	0.196116	0.681385	0.339683	0.138675	0.226455	0.532181	0.858754	0.138675	0.392232	0.392232	0.196116	0.518875	0.920737	0.196116	Sample_151:1/1;Sample_1540:1/1;Sample_1799:0/1;Sample_1825:1/1;Sample_185:1/1;Sample_282:0/1;Sample_320:0/1;Sample_421:1/1;Sample_422:1/1;Sample_423:0/1;Sample_424:0/1;Sample_425:1/1;Sample_426:1/1;Sample_427:1/1;Sample_433:1/1;Sample_434:0/1;Sample_435:1/1;Sample_436:1/1;Sample_437:1/1;Sample_498:0/1;Sample_504:1/1;Sample_599:1/1;Sample_748:0/1;Sample_831:1/1;Sample_B-8274:1/1;Sample_B-8323:1/1	1	1600852	1600852	1	T	TA	frameshift_variant	HIGH	CORT_0A07200	CPAR2_207820	orf19.674	YDL209C	CWC2,	c.846_847insT	p.Asn283fs	846/1269	282/422	(CORT_0A07200|CORT_0A07200|1|1.00)	hypothetical protein	;viable;	Nucleotide-binding, alpha-beta plait|NULL|Zinc finger, CCCH-type|RNA recognition motif domain	Molecular Function: nucleotide binding (GO:0000166)||Molecular Function: nucleic acid binding (GO:0003676), Molecular Function: zinc ion binding (GO:0008270)|Molecular Function: nucleic acid binding (GO:0003676)	TRUE
1_1600853_T_TCTTCATCA	0.226455	0.350823	0.485363	0.196116	0.196116	0.438529	0.622752	0.196116	0.196116	0.681385	0.339683	0.138675	0.226455	0.532181	0.858754	0.138675	0.392232	0.392232	0.196116	0.518875	0.920737	0.196116	Sample_151:1/1;Sample_1540:1/1;Sample_1799:0/1;Sample_1825:1/1;Sample_185:1/1;Sample_282:0/1;Sample_320:0/1;Sample_421:1/1;Sample_422:1/1;Sample_423:0/1;Sample_424:0/1;Sample_425:1/1;Sample_426:1/1;Sample_427:1/1;Sample_433:1/1;Sample_434:0/1;Sample_435:1/1;Sample_436:1/1;Sample_437:1/1;Sample_498:0/1;Sample_504:1/1;Sample_599:1/1;Sample_748:0/1;Sample_831:1/1;Sample_B-8274:1/1;Sample_B-8323:1/1	1	1600853	1600853	1	T	TCTTCATCA	frameshift_variant	HIGH	CORT_0A07200	CPAR2_207820	orf19.674	YDL209C	CWC2,	c.845_846insTGATGAAG	p.Glu282fs	845/1269	282/422	(CORT_0A07200|CORT_0A07200|1|1.00)	hypothetical protein	;viable;	Nucleotide-binding, alpha-beta plait|NULL|Zinc finger, CCCH-type|RNA recognition motif domain	Molecular Function: nucleotide binding (GO:0000166)||Molecular Function: nucleic acid binding (GO:0003676), Molecular Function: zinc ion binding (GO:0008270)|Molecular Function: nucleic acid binding (GO:0003676)	TRUE
1_1616278_GTGGA_G	0.226455	0.350823	0.485363	0.196116	0.196116	0.438529	0.622752	0.196116	0.196116	0.681385	0.339683	0.138675	0.226455	0.532181	0.858754	0.138675	0.392232	0.392232	0.196116	0.518875	0.920737	0.196116	Sample_151:1/1;Sample_1540:1/1;Sample_1799:0/1;Sample_1825:1/1;Sample_185:1/1;Sample_282:0/1;Sample_320:0/1;Sample_421:1/1;Sample_422:1/1;Sample_423:0/1;Sample_424:0/1;Sample_425:1/1;Sample_426:1/1;Sample_427:1/1;Sample_433:1/1;Sample_434:0/1;Sample_435:1/1;Sample_436:1/1;Sample_437:1/1;Sample_498:0/1;Sample_504:1/1;Sample_599:1/1;Sample_748:0/1;Sample_831:1/1;Sample_B-8274:1/1;Sample_B-8323:1/1	1	1616278	1616282	5	GTGGA	G	frameshift_variant	HIGH	CORT_0A07260	CPAR2_207930	orf19.665	YLR186W	EMG1,NEP1	c.45_48delTGGA	p.Gly16fs	45/846	15/281	character(0)	similar to C. parapsilosis CPAR2_207930 and C. albicans NEP1similar to S. cerevisiae EMG1, a putative 18S rRNA maturation protein	;viable;|;viable;|;inviable;homozygous null mutant strain could not be recovered, suggesting that the gene is essential under the selection conditions	Ribosomal biogenesis, methyltransferase, EMG1/NEP1|NULL	Molecular Function: methyltransferase activity (GO:0008168)|	TRUE
1_1616284_G_GC	0.226455	0.350823	0.485363	0.196116	0.196116	0.438529	0.622752	0.196116	0.196116	0.681385	0.339683	0.138675	0.226455	0.532181	0.858754	0.138675	0.392232	0.392232	0.196116	0.518875	0.920737	0.196116	Sample_151:1/1;Sample_1540:1/1;Sample_1799:0/1;Sample_1825:1/1;Sample_185:1/1;Sample_282:0/1;Sample_320:0/1;Sample_421:1/1;Sample_422:1/1;Sample_423:0/1;Sample_424:0/1;Sample_425:1/1;Sample_426:1/1;Sample_427:1/1;Sample_433:1/1;Sample_434:0/1;Sample_435:1/1;Sample_436:1/1;Sample_437:1/1;Sample_498:0/1;Sample_504:1/1;Sample_599:1/1;Sample_748:0/1;Sample_831:1/1;Sample_B-8274:1/1;Sample_B-8323:1/1	1	1616284	1616284	1	G	GC	frameshift_variant	HIGH	CORT_0A07260	CPAR2_207930	orf19.665	YLR186W	EMG1,NEP1	c.50_51insC	p.Asn18fs	51/846	17/281	(CORT_0A07260|CORT_0A07260|1|1.00)	similar to C. parapsilosis CPAR2_207930 and C. albicans NEP1similar to S. cerevisiae EMG1, a putative 18S rRNA maturation protein	;viable;|;viable;|;inviable;homozygous null mutant strain could not be recovered, suggesting that the gene is essential under the selection conditions	Ribosomal biogenesis, methyltransferase, EMG1/NEP1|NULL	Molecular Function: methyltransferase activity (GO:0008168)|	TRUE
1_1616290_AC_A	0.226455	0.350823	0.485363	0.196116	0.196116	0.438529	0.622752	0.196116	0.196116	0.681385	0.339683	0.138675	0.226455	0.532181	0.858754	0.138675	0.392232	0.392232	0.196116	0.518875	0.920737	0.196116	Sample_151:1/1;Sample_1540:1/1;Sample_1799:0/1;Sample_1825:1/1;Sample_185:1/1;Sample_282:0/1;Sample_320:0/1;Sample_421:1/1;Sample_422:1/1;Sample_423:0/1;Sample_424:0/1;Sample_425:1/1;Sample_426:1/1;Sample_427:1/1;Sample_433:1/1;Sample_434:0/1;Sample_435:1/1;Sample_436:1/1;Sample_437:1/1;Sample_498:0/1;Sample_504:1/1;Sample_599:1/1;Sample_748:0/1;Sample_831:1/1;Sample_B-8274:1/1;Sample_B-8323:1/1	1	1616290	1616291	2	AC	A	frameshift_variant	HIGH	CORT_0A07260	CPAR2_207930	orf19.665	YLR186W	EMG1,NEP1	c.57delC	p.Asn19fs	57/846	19/281	(CORT_0A07260|CORT_0A07260|1|1.00)	similar to C. parapsilosis CPAR2_207930 and C. albicans NEP1similar to S. cerevisiae EMG1, a putative 18S rRNA maturation protein	;viable;|;viable;|;inviable;homozygous null mutant strain could not be recovered, suggesting that the gene is essential under the selection conditions	Ribosomal biogenesis, methyltransferase, EMG1/NEP1|NULL	Molecular Function: methyltransferase activity (GO:0008168)|	TRUE
1_1616293_AAC_A	0.226455	0.350823	0.485363	0.196116	0.196116	0.438529	0.622752	0.196116	0.196116	0.681385	0.339683	0.138675	0.226455	0.532181	0.858754	0.138675	0.392232	0.392232	0.196116	0.518875	0.920737	0.196116	Sample_151:1/1;Sample_1540:1/1;Sample_1799:0/1;Sample_1825:1/1;Sample_185:1/1;Sample_282:0/1;Sample_320:0/1;Sample_421:1/1;Sample_422:1/1;Sample_423:0/1;Sample_424:0/1;Sample_425:1/1;Sample_426:1/1;Sample_427:1/1;Sample_433:1/1;Sample_434:0/1;Sample_435:1/1;Sample_436:1/1;Sample_437:1/1;Sample_498:0/1;Sample_504:1/1;Sample_599:1/1;Sample_748:0/1;Sample_831:1/1;Sample_B-8274:1/1;Sample_B-8323:1/1	1	1616293	1616295	3	AAC	A	frameshift_variant	HIGH	CORT_0A07260	CPAR2_207930	orf19.665	YLR186W	EMG1,NEP1	c.61_62delCA	p.Gln21fs	61/846	21/281	(CORT_0A07260|CORT_0A07260|1|1.00)	similar to C. parapsilosis CPAR2_207930 and C. albicans NEP1similar to S. cerevisiae EMG1, a putative 18S rRNA maturation protein	;viable;|;viable;|;inviable;homozygous null mutant strain could not be recovered, suggesting that the gene is essential under the selection conditions	Ribosomal biogenesis, methyltransferase, EMG1/NEP1|NULL	Molecular Function: methyltransferase activity (GO:0008168)|	TRUE
1_1620949_C_CTCCTG	0.226455	0.350823	0.485363	0.196116	0.196116	0.438529	0.622752	0.196116	0.196116	0.681385	0.339683	0.138675	0.226455	0.532181	0.858754	0.138675	0.392232	0.392232	0.196116	0.518875	0.920737	0.196116	Sample_151:1/1;Sample_1540:1/1;Sample_1799:0/1;Sample_1825:1/1;Sample_185:1/1;Sample_282:0/1;Sample_320:0/1;Sample_421:1/1;Sample_422:1/1;Sample_423:0/1;Sample_424:0/1;Sample_425:1/1;Sample_426:1/1;Sample_427:1/1;Sample_433:1/1;Sample_434:0/1;Sample_435:1/1;Sample_436:1/1;Sample_437:1/1;Sample_498:0/1;Sample_504:1/1;Sample_599:1/1;Sample_748:0/1;Sample_831:1/1;Sample_B-8274:1/1;Sample_B-8323:1/1	1	1620949	1620949	1	C	CTCCTG	frameshift_variant	HIGH	CORT_0A07270	CPAR2_207940	orf19.663	YDR507C	GIN4,GIN4	c.216_217insCAGGA	p.Glu73fs	216/3930	72/1309	(CORT_0A07270|CORT_0A07270|1|1.00)	autophosphorylated kinase	;germ tube formation: abnormal;primary septum is not formed in germ tube|;germ tube formation: abnormal;primary septum is not formed in germ tube|;septum formation: abnormal;abnormal septin dynamics in germ tube|;septum formation: abnormal;abnormal septin dynamics in germ tube|;septum formation: abnormal;decreased formation of primary septum|;septum formation: abnormal;decreased formation of sept…	Serine/threonine-protein kinase, active site|NULL|Protein kinase-like domain|Protein kinase, catalytic domain|Protein kinase, ATP binding site|Serine/threonine- / dual-specificity protein kinase, catalytic domain	Molecular Function: protein serine/threonine kinase activity (GO:0004674), Biological Process: protein phosphorylation (GO:0006468)||Molecular Function: transferase activity, transferring phosphorus-containing groups (GO:0016772)|Molecular Function: protein kinase activity (GO:0004672), Molecular Function: ATP binding (GO:0005524), Biological Process: protein phosphorylation (GO:0006468)|Molecula…	TRUE
1_1620956_C_CACCACCATCA	0.226455	0.350823	0.485363	0.196116	0.196116	0.438529	0.622752	0.196116	0.196116	0.681385	0.339683	0.138675	0.226455	0.532181	0.858754	0.138675	0.392232	0.392232	0.196116	0.518875	0.920737	0.196116	Sample_151:1/1;Sample_1540:1/1;Sample_1799:0/1;Sample_1825:1/1;Sample_185:1/1;Sample_282:0/1;Sample_320:0/1;Sample_421:1/1;Sample_422:1/1;Sample_423:0/1;Sample_424:0/1;Sample_425:1/1;Sample_426:1/1;Sample_427:1/1;Sample_433:1/1;Sample_434:0/1;Sample_435:1/1;Sample_436:1/1;Sample_437:1/1;Sample_498:0/1;Sample_504:1/1;Sample_599:1/1;Sample_748:0/1;Sample_831:1/1;Sample_B-8274:1/1;Sample_B-8323:1/1	1	1620956	1620956	1	C	CACCACCATCA	frameshift_variant	HIGH	CORT_0A07270	CPAR2_207940	orf19.663	YDR507C	GIN4,GIN4	c.209_210insTGATGGTGGT	p.Glu70fs	209/3930	70/1309	(CORT_0A07270|CORT_0A07270|1|1.00)	autophosphorylated kinase	;germ tube formation: abnormal;primary septum is not formed in germ tube|;germ tube formation: abnormal;primary septum is not formed in germ tube|;septum formation: abnormal;abnormal septin dynamics in germ tube|;septum formation: abnormal;abnormal septin dynamics in germ tube|;septum formation: abnormal;decreased formation of primary septum|;septum formation: abnormal;decreased formation of sept…	Serine/threonine-protein kinase, active site|NULL|Protein kinase-like domain|Protein kinase, catalytic domain|Protein kinase, ATP binding site|Serine/threonine- / dual-specificity protein kinase, catalytic domain	Molecular Function: protein serine/threonine kinase activity (GO:0004674), Biological Process: protein phosphorylation (GO:0006468)||Molecular Function: transferase activity, transferring phosphorus-containing groups (GO:0016772)|Molecular Function: protein kinase activity (GO:0004672), Molecular Function: ATP binding (GO:0005524), Biological Process: protein phosphorylation (GO:0006468)|Molecula…	TRUE
1_1623241_A_AG	0.23094	0.357771	0.494975	0.2	0.2	0.447214	0.57735	0.2	0.2	0.694879	0.34641	0.141421	0.23094	0.54272	0.834058	0.141421	0.4	0.4	0.2	0.52915	0.898146	0.2	Sample_151:1/1;Sample_1540:1/1;Sample_1799:0/1;Sample_1825:1/1;Sample_185:1/1;Sample_282:0/1;Sample_320:0/1;Sample_421:1/1;Sample_422:1/1;Sample_423:0/1;Sample_425:1/1;Sample_426:1/1;Sample_427:1/1;Sample_433:1/1;Sample_434:0/1;Sample_435:1/1;Sample_436:1/1;Sample_437:1/1;Sample_498:0/1;Sample_504:1/1;Sample_599:1/1;Sample_748:0/1;Sample_831:1/1;Sample_B-8274:1/1;Sample_B-8323:1/1	1	1623241	1623241	1	A	AG	frameshift_variant	HIGH	CORT_0A07280	CPAR2_207950	orf19.8278	---		c.111_112insC	p.Phe38fs	111/525	37/174	(CORT_0A07280|CORT_0A07280|1|1.00)	hypothetical protein	NA	NULL		FALSE
1_1623318_C_T	0.226455	0.350823	0.485363	0.196116	0.196116	0.438529	0.622752	0.196116	0.196116	0.681385	0.339683	0.138675	0.226455	0.532181	0.858754	0.138675	0.392232	0.392232	0.196116	0.518875	0.920737	0.196116	Sample_151:1/1;Sample_1540:1/1;Sample_1799:0/1;Sample_1825:1/1;Sample_185:1/1;Sample_282:0/1;Sample_320:0/1;Sample_421:1/1;Sample_422:1/1;Sample_423:0/1;Sample_424:0/1;Sample_425:1/1;Sample_426:1/1;Sample_427:1/1;Sample_433:1/1;Sample_434:0/1;Sample_435:1/1;Sample_436:1/1;Sample_437:1/1;Sample_498:0/1;Sample_504:1/1;Sample_599:1/1;Sample_748:0/1;Sample_831:1/1;Sample_B-8274:1/1;Sample_B-8323:1/1	1	1623318	1623318	1	C	T	stop_gained	HIGH	CORT_0A07280	CPAR2_207950	orf19.8278	---		c.35G>A	p.Trp12*	35/525	12/174	character(0)	hypothetical protein	NA	NULL		FALSE
1_1624310_A_AGG	0.235702	0.365148	0.433013	0.204124	0.204124	0.456435	0.648181	0.204124	0.204124	0.709208	0.235702	0.144338	0.235702	0.553912	0.851257	0.144338	0.204124	0.204124	0.204124	0.385758	0.875	0.204124	Sample_151:1/1;Sample_1540:1/1;Sample_1799:0/1;Sample_1825:1/1;Sample_185:1/1;Sample_282:0/1;Sample_320:0/1;Sample_421:1/1;Sample_422:1/1;Sample_423:0/1;Sample_424:0/1;Sample_425:0/1;Sample_426:0/1;Sample_427:0/1;Sample_433:1/1;Sample_434:0/1;Sample_435:0/1;Sample_436:0/1;Sample_437:1/1;Sample_498:0/1;Sample_599:1/1;Sample_748:0/1;Sample_B-8274:1/1;Sample_B-8323:0/1	1	1624310	1624310	1	A	AGG	frameshift_variant	HIGH	CORT_0A07290	CPAR2_207960	orf19.661	YCL059C	KRR1,KRR1	c.989_990insGG	p.Lys333fs	990/1095	330/364	(CORT_0A07290|CORT_0A07290|1|1.00)	putative nucleolar protein	;viable;|;virulence: absent;	NULL|K Homology domain|Ribosomal RNA assembly KRR1	|Molecular Function: RNA binding (GO:0003723)	TRUE
1_1624315_AAG_A	0.235702	0.365148	0.433013	0.204124	0.204124	0.456435	0.648181	0.204124	0.204124	0.709208	0.235702	0.144338	0.235702	0.553912	0.851257	0.144338	0.204124	0.204124	0.204124	0.385758	0.875	0.204124	Sample_151:1/1;Sample_1540:1/1;Sample_1799:0/1;Sample_1825:1/1;Sample_185:1/1;Sample_282:0/1;Sample_320:0/1;Sample_421:1/1;Sample_422:1/1;Sample_423:0/1;Sample_424:0/1;Sample_425:0/1;Sample_426:0/1;Sample_427:0/1;Sample_433:1/1;Sample_434:0/1;Sample_435:0/1;Sample_436:0/1;Sample_437:1/1;Sample_498:0/1;Sample_599:1/1;Sample_748:0/1;Sample_B-8274:1/1;Sample_B-8323:0/1	1	1624315	1624317	3	AAG	A	frameshift_variant	HIGH	CORT_0A07290	CPAR2_207960	orf19.661	YCL059C	KRR1,KRR1	c.996_997delGA	p.Lys333fs	996/1095	332/364	(CORT_0A07290|CORT_0A07290|1|1.00)	putative nucleolar protein	;viable;|;virulence: absent;	NULL|K Homology domain|Ribosomal RNA assembly KRR1	|Molecular Function: RNA binding (GO:0003723)	TRUE
1_1625737_ATG_A	0.246183	0.286039	0.376889	0.213201	0.213201	0.381385	0.615457	0.213201	0	0.683763	0.246183	0.150756	0.246183	0.514259	0.800198	0.150756	0.213201	0.213201	0.213201	0.402911	0.870388	0.213201	Sample_151:1/1;Sample_1540:1/1;Sample_1799:0/1;Sample_1825:1/1;Sample_185:1/1;Sample_282:0/1;Sample_320:0/1;Sample_421:1/1;Sample_422:1/1;Sample_423:0/1;Sample_424:0/1;Sample_425:0/1;Sample_427:0/1;Sample_433:1/1;Sample_434:0/1;Sample_436:0/1;Sample_437:1/1;Sample_498:0/1;Sample_599:1/1;Sample_748:0/1;Sample_B-8274:1/1;Sample_B-8323:0/1	1	1625737	1625739	3	ATG	A	frameshift_variant	HIGH	CORT_0A07300	CPAR2_207970	orf19.660	---		c.432_433delTG	p.Asp144fs	432/2235	144/744	(CORT_0A07300|CORT_0A07300|1|1.00)	hypothetical protein	;competitive fitness: normal;R\I score is the median log2(R/I) value representing abundance of the mutant in recovered pool relative to inoculum|;colony appearance: normal;Morphology (M) score represents relative sizes of central and peripheral regions of colony|;vegetative growth: normal rate;|;viable;	NA	NA	FALSE
1_1628204_CA_C	0.123091	0	0.301511	0	0	0.476731	0.677003	0.213201	0.213201	0.740744	0.369274	0	0	0.385695	0.755742	0.150756	0.426401	0.426401	0.213201	0.483494	0.870388	0.213201	Sample_151:1/1;Sample_1540:1/1;Sample_1825:1/1;Sample_185:1/1;Sample_282:0/1;Sample_320:0/1;Sample_421:1/1;Sample_422:1/1;Sample_424:0/1;Sample_425:0/1;Sample_427:0/1;Sample_433:1/1;Sample_435:0/1;Sample_436:0/1;Sample_437:1/1;Sample_498:0/1;Sample_504:0/1;Sample_599:1/1;Sample_748:0/1;Sample_831:0/1;Sample_B-8274:1/1;Sample_B-8323:0/1	1	1628204	1628205	2	CA	C	frameshift_variant	HIGH	CORT_0A07310	CPAR2_207980	orf19.658	YCL061C	MRC1,GIN1	c.3222delT	p.Asp1074fs	3222/3795	1074/1264	(CORT_0A07310|CORT_0A07310|1|1.00)	protein involved in regulation of DNA-damage-induced filamentous growth	;vegetative growth: decreased rate;|;viable;|;viable;|;viable;|;cell shape: abnormal;cells are elongated|methyl methanesulfonate;resistance to chemicals: decreased;|hydroxyurea;resistance to chemicals: decreased;	DNA replication checkpoint mediator, MRC1 domain		TRUE
1_1628206_TCA_T	0.123091	0	0.301511	0	0	0.476731	0.677003	0.213201	0.213201	0.740744	0.369274	0	0	0.385695	0.755742	0.150756	0.426401	0.426401	0.213201	0.483494	0.870388	0.213201	Sample_151:1/1;Sample_1540:1/1;Sample_1825:1/1;Sample_185:1/1;Sample_282:0/1;Sample_320:0/1;Sample_421:1/1;Sample_422:1/1;Sample_424:0/1;Sample_425:0/1;Sample_427:0/1;Sample_433:1/1;Sample_435:0/1;Sample_436:0/1;Sample_437:1/1;Sample_498:0/1;Sample_504:0/1;Sample_599:1/1;Sample_748:0/1;Sample_831:0/1;Sample_B-8274:1/1;Sample_B-8323:0/1	1	1628206	1628208	3	TCA	T	frameshift_variant	HIGH	CORT_0A07310	CPAR2_207980	orf19.658	YCL061C	MRC1,GIN1	c.3219_3220delTG	p.Asp1073fs	3220/3795	1073/1264	(CORT_0A07310|CORT_0A07310|1|1.00)	protein involved in regulation of DNA-damage-induced filamentous growth	;vegetative growth: decreased rate;|;viable;|;viable;|;viable;|;cell shape: abnormal;cells are elongated|methyl methanesulfonate;resistance to chemicals: decreased;|hydroxyurea;resistance to chemicals: decreased;	DNA replication checkpoint mediator, MRC1 domain		TRUE
1_1631384_C_CT	0.240772	0.279751	0.442326	0.208514	0.208514	0.373002	0.601929	0.208514	0	0.613006	0.361158	0.147442	0.240772	0.502956	0.782609	0.147442	0.417029	0.417029	0.208514	0.551677	0.936382	0.208514	Sample_151:1/1;Sample_1540:1/1;Sample_1799:0/1;Sample_1825:1/1;Sample_185:1/1;Sample_282:0/1;Sample_320:0/1;Sample_421:1/1;Sample_422:1/1;Sample_423:0/1;Sample_424:0/1;Sample_425:0/1;Sample_433:1/1;Sample_434:0/1;Sample_436:0/1;Sample_437:1/1;Sample_498:0/1;Sample_504:0/1;Sample_599:1/1;Sample_748:0/1;Sample_831:0/1;Sample_B-8274:1/1;Sample_B-8323:0/1	1	1631384	1631384	1	C	CT	frameshift_variant	HIGH	CORT_0A07310	CPAR2_207980	orf19.658	YCL061C	MRC1,GIN1	c.42_43insA	p.Ala15fs	42/3795	14/1264	character(0)	protein involved in regulation of DNA-damage-induced filamentous growth	;vegetative growth: decreased rate;|;viable;|;viable;|;viable;|;cell shape: abnormal;cells are elongated|methyl methanesulfonate;resistance to chemicals: decreased;|hydroxyurea;resistance to chemicals: decreased;	DNA replication checkpoint mediator, MRC1 domain		FALSE
1_1631417_CA_C	0.136083	0	0.333333	0	0	0.421637	0.612372	0.235702	0	0.692935	0.408248	0	0	0.355335	0.688062	0.166667	0.471405	0.471405	0.235702	0.534522	0.866025	0.235702	Sample_151:1/1;Sample_1540:1/1;Sample_1825:1/1;Sample_185:1/1;Sample_282:0/1;Sample_421:1/1;Sample_422:1/1;Sample_424:0/1;Sample_425:0/1;Sample_433:1/1;Sample_436:0/1;Sample_437:1/1;Sample_504:0/1;Sample_599:1/1;Sample_748:0/1;Sample_831:0/1;Sample_B-8274:1/1;Sample_B-8323:0/1	1	1631417	1631418	2	CA	C	frameshift_variant	HIGH	CORT_0A07310	CPAR2_207980	orf19.658	YCL061C	MRC1,GIN1	c.9delT	p.Phe3fs	3795-09-01	3/1264	character(0)	protein involved in regulation of DNA-damage-induced filamentous growth	;vegetative growth: decreased rate;|;viable;|;viable;|;viable;|;cell shape: abnormal;cells are elongated|methyl methanesulfonate;resistance to chemicals: decreased;|hydroxyurea;resistance to chemicals: decreased;	DNA replication checkpoint mediator, MRC1 domain		TRUE
1_1631425_A_G	0.136083	0	0.333333	0	0	0.421637	0.612372	0.235702	0	0.692935	0.408248	0	0	0.355335	0.688062	0.166667	0.471405	0.471405	0.235702	0.534522	0.866025	0.235702	Sample_151:1/1;Sample_1540:1/1;Sample_1825:1/1;Sample_185:1/1;Sample_282:0/1;Sample_421:1/1;Sample_422:1/1;Sample_424:0/1;Sample_425:0/1;Sample_433:1/1;Sample_436:0/1;Sample_437:1/1;Sample_504:0/1;Sample_599:1/1;Sample_748:0/1;Sample_831:0/1;Sample_B-8274:1/1;Sample_B-8323:0/1	1	1631425	1631425	1	A	G	start_lost	HIGH	CORT_0A07310	CPAR2_207980	orf19.658	YCL061C	MRC1,GIN1	c.2T>C	p.Met1?	3795-02-01	1/1264	(CORT_0A07310|CORT_0A07310|1|1.00)	protein involved in regulation of DNA-damage-induced filamentous growth	;vegetative growth: decreased rate;|;viable;|;viable;|;viable;|;cell shape: abnormal;cells are elongated|methyl methanesulfonate;resistance to chemicals: decreased;|hydroxyurea;resistance to chemicals: decreased;	DNA replication checkpoint mediator, MRC1 domain		TRUE
1_1631426_T_C	0.136083	0	0.333333	0	0	0.421637	0.612372	0.235702	0	0.692935	0.408248	0	0	0.355335	0.688062	0.166667	0.471405	0.471405	0.235702	0.534522	0.866025	0.235702	Sample_151:1/1;Sample_1540:1/1;Sample_1825:1/1;Sample_185:1/1;Sample_282:0/1;Sample_421:1/1;Sample_422:1/1;Sample_424:0/1;Sample_425:0/1;Sample_433:1/1;Sample_436:0/1;Sample_437:1/1;Sample_504:0/1;Sample_599:1/1;Sample_748:0/1;Sample_831:0/1;Sample_B-8274:1/1;Sample_B-8323:0/1	1	1631426	1631426	1	T	C	start_lost	HIGH	CORT_0A07310	CPAR2_207980	orf19.658	YCL061C	MRC1,GIN1	c.1A>G	p.Met1?	3795-01-01	1/1264	(CORT_0A07310|CORT_0A07310|1|1.00)	protein involved in regulation of DNA-damage-induced filamentous growth	;vegetative growth: decreased rate;|;viable;|;viable;|;viable;|;cell shape: abnormal;cells are elongated|methyl methanesulfonate;resistance to chemicals: decreased;|hydroxyurea;resistance to chemicals: decreased;	DNA replication checkpoint mediator, MRC1 domain		TRUE
1_1643465_CT_C	0.235702	0.365148	0.433013	0.204124	0.204124	0.365148	0.589256	0.204124	0.204124	0.600099	0.353553	0.144338	0.235702	0.553912	0.808694	0.144338	0.306186	0.306186	0.204124	0.46291	0.875	0.204124	Sample_151:0/1;Sample_1540:0/1;Sample_1799:0/1;Sample_1825:0/1;Sample_185:0/1;Sample_282:0/1;Sample_320:0/1;Sample_422:0/1;Sample_423:0/1;Sample_424:0/1;Sample_425:0/1;Sample_426:0/1;Sample_427:0/1;Sample_433:0/1;Sample_434:0/1;Sample_435:0/1;Sample_437:0/1;Sample_498:0/1;Sample_504:0/1;Sample_599:0/1;Sample_748:0/1;Sample_831:0/1;Sample_B-8274:1/1;Sample_B-8323:0/1	1	1643465	1643466	2	CT	C	frameshift_variant	HIGH	CORT_0A07380	CPAR2_208050	orf19.4446	---		c.1364delA	p.Glu455fs	1364/1653	455/550	(CORT_0A07380|CORT_0A07380|1|1.00)	protein similar to ammomium permeases	NA	NULL|Ammonium transporter AmtB-like|Ammonium transporter	|Molecular Function: ammonium transmembrane transporter activity (GO:0008519), Biological Process: ammonium transport (GO:0015696), Cellular Component: membrane (GO:0016020)|Molecular Function: ammonium transmembrane transporter activity (GO:0008519), Cellular Component: membrane (GO:0016020), Biological Process: ammonium transmembrane transport (GO:0072488)	TRUE
1_1643470_T_TC	0.235702	0.365148	0.433013	0.204124	0.204124	0.365148	0.589256	0.204124	0.204124	0.600099	0.353553	0.144338	0.235702	0.553912	0.808694	0.144338	0.306186	0.306186	0.204124	0.46291	0.875	0.204124	Sample_151:0/1;Sample_1540:0/1;Sample_1799:0/1;Sample_1825:0/1;Sample_185:0/1;Sample_282:0/1;Sample_320:0/1;Sample_422:0/1;Sample_423:0/1;Sample_424:0/1;Sample_425:0/1;Sample_426:0/1;Sample_427:0/1;Sample_433:0/1;Sample_434:0/1;Sample_435:0/1;Sample_437:0/1;Sample_498:0/1;Sample_504:0/1;Sample_599:0/1;Sample_748:0/1;Sample_831:0/1;Sample_B-8274:1/1;Sample_B-8323:0/1	1	1643470	1643470	1	T	TC	frameshift_variant	HIGH	CORT_0A07380	CPAR2_208050	orf19.4446	---		c.1359dupG	p.Arg454fs	1359/1653	453/550	(CORT_0A07380|CORT_0A07380|1|1.00)	protein similar to ammomium permeases	NA	NULL|Ammonium transporter AmtB-like|Ammonium transporter	|Molecular Function: ammonium transmembrane transporter activity (GO:0008519), Biological Process: ammonium transport (GO:0015696), Cellular Component: membrane (GO:0016020)|Molecular Function: ammonium transmembrane transporter activity (GO:0008519), Cellular Component: membrane (GO:0016020), Biological Process: ammonium transmembrane transport (GO:0072488)	TRUE
1_1651403_G_A	0.120386	0.0932505	0.368605	0	0	0.466252	0.662122	0.208514	0.208514	0.724462	0.361158	0	0	0.377217	0.782609	0.147442	0.417029	0.417029	0.208514	0.472866	0.893819	0.208514	Sample_151:0/1;Sample_1540:0/1;Sample_1825:0/1;Sample_185:0/1;Sample_282:0/1;Sample_320:0/1;Sample_421:0/1;Sample_422:0/1;Sample_424:0/1;Sample_425:0/1;Sample_426:0/1;Sample_427:0/1;Sample_433:0/1;Sample_435:0/1;Sample_436:0/1;Sample_437:0/1;Sample_498:0/1;Sample_504:0/1;Sample_599:0/1;Sample_748:0/1;Sample_831:0/1;Sample_B-8274:0/1;Sample_B-8323:0/1	1	1651403	1651403	1	G	A	stop_gained	HIGH	CORT_0A07410	CPAR2_208080	orf19.1171	---	BTA1	c.88C>T	p.Arg30*	88/2547	30/848	character(0)	hypothetical protein	;viable;|;colony appearance: normal;Morphology (M) score represents relative sizes of central and peripheral regions of colony|;vegetative growth: decreased rate;|;viable;|;competitive fitness: normal;R\I score is the median log2(R/I) value representing abundance of the mutant in recovered pool relative to inoculum	Protein of unknown function DUF3419|NULL		TRUE
1_1651411_G_T	0.120386	0.0932505	0.368605	0	0	0.466252	0.662122	0.208514	0.208514	0.724462	0.361158	0	0	0.377217	0.782609	0.147442	0.417029	0.417029	0.208514	0.472866	0.893819	0.208514	Sample_151:0/1;Sample_1540:0/1;Sample_1825:0/1;Sample_185:0/1;Sample_282:0/1;Sample_320:0/1;Sample_421:0/1;Sample_422:0/1;Sample_424:0/1;Sample_425:0/1;Sample_426:0/1;Sample_427:0/1;Sample_433:0/1;Sample_435:0/1;Sample_436:0/1;Sample_437:0/1;Sample_498:0/1;Sample_504:0/1;Sample_599:0/1;Sample_748:0/1;Sample_831:0/1;Sample_B-8274:0/1;Sample_B-8323:0/1	1	1651411	1651411	1	G	T	stop_gained	HIGH	CORT_0A07410	CPAR2_208080	orf19.1171	---	BTA1	c.80C>A	p.Ser27*	80/2547	27/848	character(0)	hypothetical protein	;viable;|;colony appearance: normal;Morphology (M) score represents relative sizes of central and peripheral regions of colony|;vegetative growth: decreased rate;|;viable;|;competitive fitness: normal;R\I score is the median log2(R/I) value representing abundance of the mutant in recovered pool relative to inoculum	Protein of unknown function DUF3419|NULL		TRUE
1_1651488_C_T	0.120386	0.0932505	0.368605	0	0	0.466252	0.662122	0.208514	0.208514	0.724462	0.361158	0	0	0.377217	0.782609	0.147442	0.417029	0.417029	0.208514	0.472866	0.893819	0.208514	Sample_151:0/1;Sample_1540:0/1;Sample_1825:0/1;Sample_185:0/1;Sample_282:0/1;Sample_320:0/1;Sample_421:0/1;Sample_422:0/1;Sample_424:0/1;Sample_425:0/1;Sample_426:0/1;Sample_427:0/1;Sample_433:0/1;Sample_435:0/1;Sample_436:0/1;Sample_437:0/1;Sample_498:0/1;Sample_504:0/1;Sample_599:0/1;Sample_748:0/1;Sample_831:0/1;Sample_B-8274:0/1;Sample_B-8323:0/1	1	1651488	1651488	1	C	T	start_lost	HIGH	CORT_0A07410	CPAR2_208080	orf19.1171	---	BTA1	c.3G>A	p.Met1?	2547-03-01	1/848	(CORT_0A07410|CORT_0A07410|1|1.00)	hypothetical protein	;viable;|;colony appearance: normal;Morphology (M) score represents relative sizes of central and peripheral regions of colony|;vegetative growth: decreased rate;|;viable;|;competitive fitness: normal;R\I score is the median log2(R/I) value representing abundance of the mutant in recovered pool relative to inoculum	Protein of unknown function DUF3419|NULL		FALSE
1_1667898_TCCAA_T	0.123091	0.0953463	0.376889	0	0	0.476731	0.677003	0.213201	0.213201	0.740744	0.369274	0	0	0.385695	0.755742	0.150756	0.426401	0.426401	0.213201	0.483494	0.870388	0.213201	Sample_151:0/1;Sample_1825:0/1;Sample_185:0/1;Sample_282:0/1;Sample_320:0/1;Sample_421:0/1;Sample_422:0/1;Sample_424:0/1;Sample_425:0/1;Sample_426:0/1;Sample_427:0/1;Sample_433:0/1;Sample_435:0/1;Sample_436:0/1;Sample_437:0/1;Sample_498:0/1;Sample_504:0/1;Sample_599:0/1;Sample_748:0/1;Sample_831:0/1;Sample_B-8274:0/1;Sample_B-8323:0/1	1	1667898	1667902	5	TCCAA	T	frameshift_variant	HIGH	CORT_0A07490	CPAR2_208160	orf19.655	YML123C	,PHO84	c.1080_1083delTTGG	p.Tyr360fs	1083/1680	360/559	(CORT_0A07490|CORT_0A07490|1|1.00)	high-affinity phosphate transporter	NA	Major facilitator superfamily domain, general substrate transporter|Sugar transporter, conserved site|Phosphate permease|NULL|General substrate transporter|Major facilitator superfamily domain	|Molecular Function: transporter activity (GO:0005215), Biological Process: transport (GO:0006810), Cellular Component: membrane (GO:0016020), Biological Process: transmembrane transport (GO:0055085)|Molecular Function: inorganic phosphate transmembrane transporter activity (GO:0005315), Biological Process: phosphate ion transport (GO:0006817), Cellular Component: integral to membrane (GO:0016021…	TRUE
1_1667902_A_AGTGG	0.123091	0.0953463	0.376889	0	0	0.476731	0.677003	0.213201	0.213201	0.740744	0.369274	0	0	0.385695	0.755742	0.150756	0.426401	0.426401	0.213201	0.483494	0.870388	0.213201	Sample_151:0/1;Sample_1825:0/1;Sample_185:0/1;Sample_282:0/1;Sample_320:0/1;Sample_421:0/1;Sample_422:0/1;Sample_424:0/1;Sample_425:0/1;Sample_426:0/1;Sample_427:0/1;Sample_433:0/1;Sample_435:0/1;Sample_436:0/1;Sample_437:0/1;Sample_498:0/1;Sample_504:0/1;Sample_599:0/1;Sample_748:0/1;Sample_831:0/1;Sample_B-8274:0/1;Sample_B-8323:0/1	1	1667902	1667902	1	A	AGTGG	frameshift_variant	HIGH	CORT_0A07490	CPAR2_208160	orf19.655	YML123C	,PHO84	c.1079_1080insCCAC	p.Trp361fs	1079/1680	360/559	(CORT_0A07490|CORT_0A07490|1|1.00)	high-affinity phosphate transporter	NA	Major facilitator superfamily domain, general substrate transporter|Sugar transporter, conserved site|Phosphate permease|NULL|General substrate transporter|Major facilitator superfamily domain	|Molecular Function: transporter activity (GO:0005215), Biological Process: transport (GO:0006810), Cellular Component: membrane (GO:0016020), Biological Process: transmembrane transport (GO:0055085)|Molecular Function: inorganic phosphate transmembrane transporter activity (GO:0005315), Biological Process: phosphate ion transport (GO:0006817), Cellular Component: integral to membrane (GO:0016021…	TRUE
1_1674752_T_TCC	0.123091	0.0953463	0.376889	0	0	0.476731	0.677003	0.213201	0.213201	0.740744	0.369274	0	0	0.385695	0.755742	0.150756	0.426401	0.426401	0.213201	0.483494	0.870388	0.213201	Sample_151:0/1;Sample_1825:0/1;Sample_185:0/1;Sample_282:0/1;Sample_320:0/1;Sample_421:0/1;Sample_422:0/1;Sample_424:0/1;Sample_425:0/1;Sample_426:0/1;Sample_427:0/1;Sample_433:0/1;Sample_435:0/1;Sample_436:0/1;Sample_437:0/1;Sample_498:0/1;Sample_504:0/1;Sample_599:0/1;Sample_748:0/1;Sample_831:0/1;Sample_B-8274:0/1;Sample_B-8323:0/1	1	1674752	1674752	1	T	TCC	frameshift_variant	HIGH	CORT_0A07495	CPAR2_208200	orf19.6196	YGR275W	,RTT102	c.39_40dupCC	p.His14fs	41/324	14/107	(CORT_0A07495|CORT_0A07495|1|1.00)	hypothetical protein	NA	NA	NA	FALSE
1_1676711_C_T	0.123091	0.0953463	0.376889	0	0	0.476731	0.677003	0.213201	0.213201	0.740744	0.369274	0	0	0.385695	0.755742	0.150756	0.426401	0.426401	0.213201	0.483494	0.870388	0.213201	Sample_151:0/1;Sample_1825:0/1;Sample_185:0/1;Sample_282:0/1;Sample_320:0/1;Sample_421:0/1;Sample_422:0/1;Sample_424:0/1;Sample_425:0/1;Sample_426:0/1;Sample_427:0/1;Sample_433:0/1;Sample_435:0/1;Sample_436:0/1;Sample_437:0/1;Sample_498:0/1;Sample_504:0/1;Sample_599:0/1;Sample_748:0/1;Sample_831:0/1;Sample_B-8274:0/1;Sample_B-8323:0/1	1	1676711	1676711	1	C	T	start_lost	HIGH	CORT_0A07500	CPAR2_208210	orf19.6195	YGR276C	,RNH70	c.3G>A	p.Met1?	3/1677	1/558	(CORT_0A07500|CORT_0A07500|1|1.00)	hypothetical protein	NA	Ribonuclease H-like domain|Exonuclease|Exonuclease, RNase T/DNA polymerase III|NULL	Molecular Function: nucleic acid binding (GO:0003676)|Molecular Function: exonuclease activity (GO:0004527), Cellular Component: intracellular (GO:0005622)|	FALSE
1_1702276_AGC_A	0.123091	0.0953463	0.376889	0	0	0.476731	0.677003	0	0.213201	0.740744	0.246183	0	0	0.385695	0.755742	0	0.426401	0.426401	0.213201	0.402911	0.870388	0	Sample_151:0/1;Sample_1540:0/1;Sample_1825:0/1;Sample_282:1/1;Sample_320:1/1;Sample_421:0/1;Sample_422:0/1;Sample_424:0/1;Sample_425:1/1;Sample_426:1/1;Sample_427:1/1;Sample_433:0/1;Sample_435:1/1;Sample_436:1/1;Sample_437:0/1;Sample_498:0/1;Sample_504:1/1;Sample_599:0/1;Sample_748:0/1;Sample_831:1/1;Sample_B-8274:0/1;Sample_B-8323:1/1	1	1702276	1702278	3	AGC	A	frameshift_variant	HIGH	CORT_0A07620	CPAR2_208330	orf19.5051	---		c.1284_1285delGC	p.Leu429fs	1285/2823	428/940	(CORT_0A07620|CORT_0A07620|1|1.00)	hypothetical protein	NA	NA	NA	TRUE
1_1702281_A_AAG	0.123091	0.0953463	0.376889	0	0	0.476731	0.677003	0	0.213201	0.740744	0.246183	0	0	0.385695	0.755742	0	0.426401	0.426401	0.213201	0.402911	0.870388	0	Sample_151:0/1;Sample_1540:0/1;Sample_1825:0/1;Sample_282:1/1;Sample_320:1/1;Sample_421:0/1;Sample_422:0/1;Sample_424:0/1;Sample_425:1/1;Sample_426:1/1;Sample_427:1/1;Sample_433:0/1;Sample_435:1/1;Sample_436:1/1;Sample_437:0/1;Sample_498:0/1;Sample_504:1/1;Sample_599:0/1;Sample_748:0/1;Sample_831:1/1;Sample_B-8274:0/1;Sample_B-8323:1/1	1	1702281	1702281	1	A	AAG	frameshift_variant	HIGH	CORT_0A07620	CPAR2_208330	orf19.5051	---		c.1280_1281insCT	p.Ala428fs	1280/2823	427/940	(CORT_0A07620|CORT_0A07620|1|1.00)	hypothetical protein	NA	NA	NA	TRUE
1_1703427_AGTTGATT_A	0.123091	0.0953463	0.376889	0	0	0.476731	0.677003	0	0.213201	0.740744	0.246183	0	0	0.385695	0.755742	0	0.426401	0.426401	0.213201	0.402911	0.870388	0	Sample_151:0/1;Sample_1540:0/1;Sample_1825:0/1;Sample_282:1/1;Sample_320:1/1;Sample_421:0/1;Sample_422:0/1;Sample_424:0/1;Sample_425:1/1;Sample_426:1/1;Sample_427:1/1;Sample_433:0/1;Sample_435:1/1;Sample_436:1/1;Sample_437:0/1;Sample_498:0/1;Sample_504:1/1;Sample_599:0/1;Sample_748:0/1;Sample_831:1/1;Sample_B-8274:0/1;Sample_B-8323:1/1	1	1703427	1703434	8	AGTTGATT	A	frameshift_variant	HIGH	CORT_0A07620	CPAR2_208330	orf19.5051	---		c.128_134delAATCAAC	p.Gln43fs	134/2823	43/940	character(0)	hypothetical protein	NA	NA	NA	FALSE
1_1703622_A_AAT	0.123091	0.0953463	0.376889	0	0	0.476731	0.677003	0	0.213201	0.740744	0.246183	0	0	0.385695	0.755742	0	0.426401	0.426401	0.213201	0.402911	0.870388	0	Sample_151:0/1;Sample_1540:0/1;Sample_1825:0/1;Sample_282:1/1;Sample_320:1/1;Sample_421:0/1;Sample_422:0/1;Sample_424:0/1;Sample_425:1/1;Sample_426:1/1;Sample_427:1/1;Sample_433:0/1;Sample_435:1/1;Sample_436:1/1;Sample_437:0/1;Sample_498:0/1;Sample_504:1/1;Sample_599:0/1;Sample_748:0/1;Sample_831:1/1;Sample_B-8274:0/1;Sample_B-8323:1/1	1	1703622	1703622	1	A	AAT	frameshift_variant	HIGH	CORT_0A07630	CPAR2_208340	orf19.5052	YFR045W	,YFR045W	c.29_30insAT	p.Asn10fs	30/1212	10/403	character(0)	hypothetical protein	NA	NULL|Mitochondrial carrier domain|Mitochondrial substrate/solute carrier		TRUE
1_1703623_CCT_C	0.123091	0.0953463	0.376889	0	0	0.476731	0.677003	0	0.213201	0.740744	0.246183	0	0	0.385695	0.755742	0	0.426401	0.426401	0.213201	0.402911	0.870388	0	Sample_151:0/1;Sample_1540:0/1;Sample_1825:0/1;Sample_282:1/1;Sample_320:1/1;Sample_421:0/1;Sample_422:0/1;Sample_424:0/1;Sample_425:1/1;Sample_426:1/1;Sample_427:1/1;Sample_433:0/1;Sample_435:1/1;Sample_436:1/1;Sample_437:0/1;Sample_498:0/1;Sample_504:1/1;Sample_599:0/1;Sample_748:0/1;Sample_831:1/1;Sample_B-8274:0/1;Sample_B-8323:1/1	1	1703623	1703625	3	CCT	C	frameshift_variant	HIGH	CORT_0A07630	CPAR2_208340	orf19.5052	YFR045W	,YFR045W	c.31_32delCT	p.Leu11fs	31/1212	11/403	character(0)	hypothetical protein	NA	NULL|Mitochondrial carrier domain|Mitochondrial substrate/solute carrier		TRUE
1_1737631_CAT_C	0.240772	0.373002	0.442326	0.208514	0.208514	0.373002	0.601929	0.208514	0.208514	0.668734	0.361158	0.147442	0.240772	0.565825	0.782609	0.147442	0.312772	0.312772	0.208514	0.472866	0.851257	0.208514	Sample_151:0/1;Sample_1540:0/1;Sample_1799:0/1;Sample_1825:1/1;Sample_185:0/1;Sample_421:0/1;Sample_422:0/1;Sample_423:0/1;Sample_424:0/1;Sample_425:0/1;Sample_426:1/1;Sample_427:0/1;Sample_433:0/1;Sample_434:0/1;Sample_435:0/1;Sample_437:0/1;Sample_498:0/1;Sample_504:1/1;Sample_599:0/1;Sample_748:0/1;Sample_831:1/1;Sample_B-8274:1/1;Sample_B-8323:0/1	1	1737631	1737633	3	CAT	C	frameshift_variant	HIGH	CORT_0A07800	CPAR2_208520	orf19.4423	YDR326C	,YSP2	c.2896_2897delAT	p.Met966fs	2897/2928	966/975	character(0)	putative glucosyltransferase	NA	GRAM|NULL		TRUE
1_1737634_G_GCA	0.240772	0.373002	0.442326	0.208514	0.208514	0.373002	0.601929	0.208514	0.208514	0.668734	0.361158	0.147442	0.240772	0.565825	0.782609	0.147442	0.312772	0.312772	0.208514	0.472866	0.851257	0.208514	Sample_151:0/1;Sample_1540:0/1;Sample_1799:0/1;Sample_1825:1/1;Sample_185:0/1;Sample_421:0/1;Sample_422:0/1;Sample_423:0/1;Sample_424:0/1;Sample_425:0/1;Sample_426:1/1;Sample_427:0/1;Sample_433:0/1;Sample_434:0/1;Sample_435:0/1;Sample_437:0/1;Sample_498:0/1;Sample_504:1/1;Sample_599:0/1;Sample_748:0/1;Sample_831:1/1;Sample_B-8274:1/1;Sample_B-8323:0/1	1	1737634	1737634	1	G	GCA	frameshift_variant	HIGH	CORT_0A07800	CPAR2_208520	orf19.4423	YDR326C	,YSP2	c.2894_2895insTG	p.Met966fs	2894/2928	965/975	character(0)	putative glucosyltransferase	NA	GRAM|NULL		TRUE
1_1738622_CCA_C	0.240772	0.373002	0.442326	0.208514	0.208514	0.373002	0.601929	0.208514	0.208514	0.668734	0.361158	0.147442	0.240772	0.565825	0.782609	0.147442	0.312772	0.312772	0.208514	0.472866	0.851257	0.208514	Sample_151:0/1;Sample_1540:0/1;Sample_1799:0/1;Sample_1825:1/1;Sample_185:0/1;Sample_421:0/1;Sample_422:0/1;Sample_423:0/1;Sample_424:0/1;Sample_425:0/1;Sample_426:1/1;Sample_427:0/1;Sample_433:0/1;Sample_434:0/1;Sample_435:0/1;Sample_437:0/1;Sample_498:0/1;Sample_504:1/1;Sample_599:0/1;Sample_748:0/1;Sample_831:1/1;Sample_B-8274:1/1;Sample_B-8323:0/1	1	1738622	1738624	3	CCA	C	frameshift_variant	HIGH	CORT_0A07800	CPAR2_208520	orf19.4423	YDR326C	,YSP2	c.1905_1906delTG	p.Ser635fs	1906/2928	635/975	(CORT_0A07800|CORT_0A07800|1|1.00)	putative glucosyltransferase	NA	GRAM|NULL		TRUE
1_1738626_TACTACCC_T	0.240772	0.373002	0.442326	0.208514	0.208514	0.373002	0.601929	0.208514	0.208514	0.668734	0.361158	0.147442	0.240772	0.565825	0.782609	0.147442	0.312772	0.312772	0.208514	0.472866	0.851257	0.208514	Sample_151:0/1;Sample_1540:0/1;Sample_1799:0/1;Sample_1825:1/1;Sample_185:0/1;Sample_421:0/1;Sample_422:0/1;Sample_423:0/1;Sample_424:0/1;Sample_425:0/1;Sample_426:1/1;Sample_427:0/1;Sample_433:0/1;Sample_434:0/1;Sample_435:0/1;Sample_437:0/1;Sample_498:0/1;Sample_504:1/1;Sample_599:0/1;Sample_748:0/1;Sample_831:1/1;Sample_B-8274:1/1;Sample_B-8323:0/1	1	1738626	1738633	8	TACTACCC	T	frameshift_variant	HIGH	CORT_0A07800	CPAR2_208520	orf19.4423	YDR326C	,YSP2	c.1896_1902delGGGTAGT	p.Gly633fs	1902/2928	632/975	(CORT_0A07800|CORT_0A07800|1|1.00)	putative glucosyltransferase	NA	GRAM|NULL		TRUE
1_1750878_A_AG	0.226455	0.350823	0.485363	0.196116	0.196116	0.438529	0.622752	0.196116	0.196116	0.681385	0.339683	0.138675	0.226455	0.532181	0.858754	0.138675	0.392232	0.392232	0.196116	0.518875	0.920737	0.196116	Sample_151:0/1;Sample_1540:0/1;Sample_1799:1/1;Sample_1825:0/1;Sample_185:0/1;Sample_282:0/1;Sample_320:0/1;Sample_421:0/1;Sample_422:0/1;Sample_423:1/1;Sample_424:0/1;Sample_425:0/1;Sample_426:1/1;Sample_427:0/1;Sample_433:0/1;Sample_434:1/1;Sample_435:0/1;Sample_436:0/1;Sample_437:0/1;Sample_498:0/1;Sample_504:0/1;Sample_599:0/1;Sample_748:0/1;Sample_831:0/1;Sample_B-8274:0/1;Sample_B-8323:0/1	1	1750878	1750878	1	A	AG	frameshift_variant	HIGH	CORT_0A07860	CPAR2_208580	---	---		c.383_384insG	p.Arg129fs	384/1218	128/405	(CORT_0A07860|CORT_0A07860|1|1.00)	hypothetical protein	NA	NULL|NADH:flavin oxidoreductase/NADH oxidase, N-terminal|Aldolase-type TIM barrel	|Molecular Function: FMN binding (GO:0010181), Molecular Function: oxidoreductase activity (GO:0016491), Biological Process: oxidation-reduction process (GO:0055114)|Molecular Function: catalytic activity (GO:0003824)	TRUE
1_1750881_GA_G	0.226455	0.350823	0.485363	0.196116	0.196116	0.438529	0.622752	0.196116	0.196116	0.681385	0.339683	0.138675	0.226455	0.532181	0.858754	0.138675	0.392232	0.392232	0.196116	0.518875	0.920737	0.196116	Sample_151:0/1;Sample_1540:0/1;Sample_1799:1/1;Sample_1825:0/1;Sample_185:0/1;Sample_282:0/1;Sample_320:0/1;Sample_421:0/1;Sample_422:0/1;Sample_423:1/1;Sample_424:0/1;Sample_425:0/1;Sample_426:1/1;Sample_427:0/1;Sample_433:0/1;Sample_434:1/1;Sample_435:0/1;Sample_436:0/1;Sample_437:0/1;Sample_498:0/1;Sample_504:0/1;Sample_599:0/1;Sample_748:0/1;Sample_831:0/1;Sample_B-8274:0/1;Sample_B-8323:0/1	1	1750881	1750882	2	GA	G	frameshift_variant	HIGH	CORT_0A07860	CPAR2_208580	---	---		c.388delA	p.Arg130fs	388/1218	130/405	(CORT_0A07860|CORT_0A07860|1|1.00)	hypothetical protein	NA	NULL|NADH:flavin oxidoreductase/NADH oxidase, N-terminal|Aldolase-type TIM barrel	|Molecular Function: FMN binding (GO:0010181), Molecular Function: oxidoreductase activity (GO:0016491), Biological Process: oxidation-reduction process (GO:0055114)|Molecular Function: catalytic activity (GO:0003824)	TRUE
1_1782127_GA_G	0.235702	0.273861	0.433013	0.204124	0.204124	0.456435	0.589256	0.204124	0.204124	0.709208	0.353553	0.144338	0.235702	0.553912	0.851257	0.144338	0.408248	0.408248	0.204124	0.540062	0.875	0.204124	Sample_151:0/1;Sample_1540:0/1;Sample_1799:0/1;Sample_1825:0/1;Sample_185:0/1;Sample_282:0/1;Sample_320:0/1;Sample_421:0/1;Sample_422:0/1;Sample_423:0/1;Sample_424:0/1;Sample_425:0/1;Sample_427:1/1;Sample_433:0/1;Sample_434:0/1;Sample_435:1/1;Sample_436:1/1;Sample_437:0/1;Sample_504:0/1;Sample_599:0/1;Sample_748:0/1;Sample_831:0/1;Sample_B-8274:0/1;Sample_B-8323:0/1	1	1782127	1782128	2	GA	G	frameshift_variant	HIGH	CORT_0A07970	CPAR2_208690	orf19.2790	YKL018W	SWD2,SWD2	c.1105delA	p.Asn369fs	1105/1116	369/371	character(0)	similar to C. parapsilosis CPAR2_208690 and C. albicans SWD2similar to S. cerevisiae SWD2	;viable;	NULL|WD40-repeat-containing domain|WD40 repeat|WD40/YVTN repeat-like-containing domain	|Molecular Function: protein binding (GO:0005515)	FALSE
1_1794820_T_TC	0.129099	0.1	0.316228	0	0	0.3	0.580948	0.223607	0	0.597614	0.387298	0	0	0.40452	0.699379	0.158114	0.33541	0.33541	0.223607	0.422577	0.867227	0.223607	Sample_151:0/1;Sample_1540:0/1;Sample_1825:0/1;Sample_185:0/1;Sample_282:0/1;Sample_320:0/1;Sample_421:0/1;Sample_422:0/1;Sample_424:0/1;Sample_425:0/1;Sample_433:0/1;Sample_434:0/1;Sample_437:0/1;Sample_498:0/1;Sample_504:0/1;Sample_599:0/1;Sample_748:0/1;Sample_831:0/1;Sample_B-8274:0/1;Sample_B-8323:0/1	1	1794820	1794820	1	T	TC	frameshift_variant&splice_region_variant	HIGH	CORT_0A08070	CPAR2_208790	orf19.6203	YKL015W	,PUT3	c.2743_2744insG		2743/2745	915/914	character(0)	predicted zinc-finger protein	NA	NULL|Zn(2)-C6 fungal-type DNA-binding domain|Transcription factor, fungi	|Molecular Function: sequence-specific DNA binding RNA polymerase II transcription factor activity (GO:0000981), Cellular Component: nucleus (GO:0005634), Biological Process: regulation of transcription, DNA-dependent (GO:0006355), Molecular Function: zinc ion binding (GO:0008270)|Molecular Function: DNA binding (GO:0003677), Cellular Component: nucleus (GO:0005634), Biological Process: transcrip…	FALSE
1_1801011_T_A	0.132453	0	0.243332	0	0	0.307794	0.59604	0.229416	0	0.613139	0.39736	0	0	0.345857	0.669711	0.162221	0.344124	0.344124	0.229416	0.433555	0.889757	0.229416	Sample_151:1/1;Sample_1540:0/1;Sample_1825:0/1;Sample_185:1/1;Sample_282:0/1;Sample_320:0/1;Sample_421:0/1;Sample_422:0/1;Sample_424:0/1;Sample_425:0/1;Sample_433:0/1;Sample_437:0/1;Sample_498:0/1;Sample_504:0/1;Sample_599:1/1;Sample_748:0/1;Sample_831:0/1;Sample_B-8274:0/1;Sample_B-8323:0/1	1	1801011	1801011	1	T	A	stop_gained	HIGH	CORT_0A08090	CPAR2_208810	orf19.6200	---		c.436A>T	p.Lys146*	436/867	146/288	character(0)	hypothetical protein	;viable;|;virulence: decreased;mutants have reduced capacity to damage oral epithelial cells	Allergen V5/Tpx-1-related, conserved site|Allergen V5/Tpx-1-related|CAP domain|NULL	Cellular Component: extracellular region (GO:0005576)|	FALSE
1_1824143_G_GAC	0.120386	0.0932505	0.368605	0	0	0.466252	0.662122	0.208514	0.208514	0.724462	0.361158	0	0	0.377217	0.782609	0.147442	0.417029	0.417029	0.208514	0.472866	0.893819	0.208514	Sample_151:0/1;Sample_1540:0/1;Sample_1825:0/1;Sample_185:0/1;Sample_282:0/1;Sample_320:0/1;Sample_421:0/1;Sample_422:0/1;Sample_424:0/1;Sample_425:0/1;Sample_426:0/1;Sample_427:0/1;Sample_433:0/1;Sample_435:0/1;Sample_436:1/1;Sample_437:0/1;Sample_498:1/1;Sample_504:0/1;Sample_599:0/1;Sample_748:0/1;Sample_831:0/1;Sample_B-8274:0/1;Sample_B-8323:0/1	1	1824143	1824143	1	G	GAC	frameshift_variant	HIGH	CORT_0A08170	CPAR2_208900	orf19.6224	---		c.271_272insAC	p.Gly91fs	272/1518	91/505	(CORT_0A08170|CORT_0A08170|1|1.00)	hypothetical protein	;viable;	NULL|RTA-like protein	|Biological Process: response to stress (GO:0006950), Cellular Component: integral to membrane (GO:0016021)	TRUE
1_1824146_GGA_G	0.120386	0.0932505	0.368605	0	0	0.466252	0.662122	0.208514	0.208514	0.724462	0.361158	0	0	0.377217	0.782609	0.147442	0.417029	0.417029	0.208514	0.472866	0.893819	0.208514	Sample_151:0/1;Sample_1540:0/1;Sample_1825:0/1;Sample_185:0/1;Sample_282:0/1;Sample_320:0/1;Sample_421:0/1;Sample_422:0/1;Sample_424:0/1;Sample_425:0/1;Sample_426:0/1;Sample_427:0/1;Sample_433:0/1;Sample_435:0/1;Sample_436:1/1;Sample_437:0/1;Sample_498:1/1;Sample_504:0/1;Sample_599:0/1;Sample_748:0/1;Sample_831:0/1;Sample_B-8274:0/1;Sample_B-8323:0/1	1	1824146	1824148	3	GGA	G	frameshift_variant	HIGH	CORT_0A08170	CPAR2_208900	orf19.6224	---		c.275_276delGA	p.Gly92fs	275/1518	92/505	(CORT_0A08170|CORT_0A08170|1|1.00)	hypothetical protein	;viable;	NULL|RTA-like protein	|Biological Process: response to stress (GO:0006950), Cellular Component: integral to membrane (GO:0016021)	TRUE
1_1825388_T_A	0.23094	0.268328	0.424264	0.2	0.2	0.447214	0.635085	0.2	0.2	0.694879	0.34641	0.141421	0.23094	0.482418	0.834058	0.141421	0.4	0.4	0.2	0.52915	0.938971	0.2	Sample_151:0/1;Sample_1540:0/1;Sample_1799:0/1;Sample_1825:0/1;Sample_185:0/1;Sample_282:0/1;Sample_320:0/1;Sample_421:0/1;Sample_422:0/1;Sample_423:0/1;Sample_424:0/1;Sample_425:0/1;Sample_426:0/1;Sample_427:0/1;Sample_433:0/1;Sample_435:0/1;Sample_436:1/1;Sample_437:0/1;Sample_498:1/1;Sample_504:0/1;Sample_599:0/1;Sample_748:0/1;Sample_831:0/1;Sample_B-8274:0/1;Sample_B-8323:0/1	1	1825388	1825388	1	T	A	stop_lost&splice_region_variant	HIGH	CORT_0A08170	CPAR2_208900	orf19.6224	---		c.1516T>A	p.Ter506Lysext*?	1516/1518	506/505	character(0)	hypothetical protein	;viable;	NULL|RTA-like protein	|Biological Process: response to stress (GO:0006950), Cellular Component: integral to membrane (GO:0016021)	FALSE
1_1826646_G_T	0.240772	0.279751	0.368605	0.208514	0.208514	0.466252	0.662122	0.208514	0.208514	0.724462	0.240772	0.147442	0.240772	0.502956	0.826087	0.147442	0.208514	0.208514	0.208514	0.394055	0.893819	0.208514	Sample_151:0/1;Sample_1540:0/1;Sample_1799:0/1;Sample_1825:0/1;Sample_185:0/1;Sample_282:0/1;Sample_320:0/1;Sample_421:0/1;Sample_422:0/1;Sample_423:0/1;Sample_424:0/1;Sample_425:0/1;Sample_426:0/1;Sample_427:0/1;Sample_433:0/1;Sample_435:0/1;Sample_436:1/1;Sample_437:0/1;Sample_498:1/1;Sample_599:0/1;Sample_748:0/1;Sample_B-8274:0/1;Sample_B-8323:0/1	1	1826646	1826646	1	G	T	stop_gained	HIGH	CORT_0A08190	CPAR2_208920	orf19.6222	YIL073C	SPO22,SPO22	c.2339C>A	p.Ser780*	2339/2835	780/944	(CORT_0A08190|CORT_0A08190|1|1.00)	similar to C. parapsilosis CPAR2_208920 and C. albicans SPO22; S. cerevisiae homolog SPO22 has role in synaptonemal complex assembly and localizes to condensed nuclear chromosome	;haploinsufficient;|;haploinsufficient;	Meiosis specific protein SPO22		FALSE
1_1887603_G_GA	0.235702	0.273861	0.360844	0.204124	0.204124	0.365148	0.589256	0.204124	0.204124	0.654654	0.353553	0.144338	0.235702	0.553912	0.808694	0.144338	0.306186	0.306186	0.204124	0.46291	0.875	0.204124	Sample_151:0/1;Sample_1540:0/1;Sample_1799:0/1;Sample_1825:0/1;Sample_185:0/1;Sample_282:0/1;Sample_320:0/1;Sample_421:0/1;Sample_422:0/1;Sample_423:0/1;Sample_424:0/1;Sample_425:0/1;Sample_427:0/1;Sample_433:0/1;Sample_434:0/1;Sample_435:0/1;Sample_437:0/1;Sample_498:0/1;Sample_504:1/1;Sample_599:0/1;Sample_748:0/1;Sample_831:1/1;Sample_B-8274:0/1;Sample_B-8323:0/1	1	1887603	1887603	1	G	GA	frameshift_variant	HIGH	CORT_0A08470	CPAR2_209210	---	---		c.17dupT	p.Val7fs	17/333	6/110	character(0)	hypothetical protein	NA	NULL		FALSE
1_1891026_A_C	0.327327	0.422577	0.534522	0.188982	0.188982	0.422577	0.654654	0.188982	0.188982	0.707107	0.327327	0.267261	0.327327	0.626783	0.906327	0.267261	0.377964	0.377964	0.188982	0.5	0.92582	0.188982	Sample_151:1/1;Sample_1540:1/1;Sample_1799:1/1;Sample_1825:1/1;Sample_185:1/1;Sample_282:1/1;Sample_320:1/1;Sample_421:1/1;Sample_422:1/1;Sample_423:1/1;Sample_424:1/1;Sample_425:1/1;Sample_426:1/1;Sample_427:1/1;Sample_428:1/1;Sample_433:1/1;Sample_434:1/1;Sample_435:1/1;Sample_436:1/1;Sample_437:1/1;Sample_498:1/1;Sample_504:1/1;Sample_599:1/1;Sample_748:1/1;Sample_831:1/1;Sample_B-8274:1/1;Sam…	1	1891026	1891026	1	A	C	stop_lost&splice_region_variant	HIGH	CORT_0A08510	CPAR2_209220	orf19.2308	YOL136C	,PFK27	c.943T>G	p.Ter315Gluext*?	943/945	315/314	character(0)	hypothetical protein	NA	6-phosphofructo-2-kinase|NULL|Fructose-2,6-bisphosphatase	Molecular Function: 6-phosphofructo-2-kinase activity (GO:0003873), Molecular Function: ATP binding (GO:0005524), Biological Process: fructose metabolic process (GO:0006000)||Molecular Function: catalytic activity (GO:0003824), Molecular Function: ATP binding (GO:0005524), Biological Process: fructose 2,6-bisphosphate metabolic process (GO:0006003)	FALSE
1_1899178_GTGGT_G	0.235702	0.365148	0.505181	0.204124	0.204124	0.365148	0.53033	0.204124	0.204124	0.654654	0.353553	0.144338	0.235702	0.492366	0.808694	0.144338	0.408248	0.408248	0.204124	0.540062	0.875	0.204124	Sample_151:0/1;Sample_1540:0/1;Sample_1799:0/1;Sample_1825:0/1;Sample_185:0/1;Sample_282:0/1;Sample_320:0/1;Sample_421:0/1;Sample_422:0/1;Sample_423:0/1;Sample_425:0/1;Sample_426:0/1;Sample_427:0/1;Sample_433:0/1;Sample_434:0/1;Sample_435:0/1;Sample_436:1/1;Sample_437:0/1;Sample_498:0/1;Sample_504:0/1;Sample_599:0/1;Sample_831:0/1;Sample_B-8274:1/1;Sample_B-8323:0/1	1	1899178	1899182	5	GTGGT	G	frameshift_variant	HIGH	CORT_0A08570	CPAR2_209280	orf19.822	---	HSP21	c.551_554delACCA	p.Asn184fs	554/573	184/190	character(0)	similar to C. parapsilosis CPAR2_209280 and C. albicans orf19.822similar to heat-shock protease protein	;biofilm formation: abnormal;forms biofilm with altered detachment properties|;viable;|;thermotolerance: decreased;|menadione;oxidative stress resistance: decreased;|;starvation resistance: decreased;|;hyphal growth: decreased;|;invasive growth: decreased;|;virulence: decreased;|ethanol (5%);resistance to chemicals: decreased;|tacrolimus (anhydrous);resistance to chemicals: decreased;	HSP20-like chaperone|NULL|Alpha crystallin/Hsp20 domain		TRUE
1_1899184_A_AAT	0.235702	0.365148	0.505181	0.204124	0.204124	0.365148	0.53033	0.204124	0.204124	0.654654	0.353553	0.144338	0.235702	0.492366	0.808694	0.144338	0.408248	0.408248	0.204124	0.540062	0.875	0.204124	Sample_151:0/1;Sample_1540:0/1;Sample_1799:0/1;Sample_1825:0/1;Sample_185:0/1;Sample_282:0/1;Sample_320:0/1;Sample_421:0/1;Sample_422:0/1;Sample_423:0/1;Sample_425:0/1;Sample_426:0/1;Sample_427:0/1;Sample_433:0/1;Sample_434:0/1;Sample_435:0/1;Sample_436:1/1;Sample_437:0/1;Sample_498:0/1;Sample_504:0/1;Sample_599:0/1;Sample_831:0/1;Sample_B-8274:1/1;Sample_B-8323:0/1	1	1899184	1899184	1	A	AAT	frameshift_variant&stop_gained	HIGH	CORT_0A08570	CPAR2_209280	orf19.822	---	HSP21	c.548_549insAT	p.Tyr183fs	548/573	183/190	character(0)	similar to C. parapsilosis CPAR2_209280 and C. albicans orf19.822similar to heat-shock protease protein	;biofilm formation: abnormal;forms biofilm with altered detachment properties|;viable;|;thermotolerance: decreased;|menadione;oxidative stress resistance: decreased;|;starvation resistance: decreased;|;hyphal growth: decreased;|;invasive growth: decreased;|;virulence: decreased;|ethanol (5%);resistance to chemicals: decreased;|tacrolimus (anhydrous);resistance to chemicals: decreased;	HSP20-like chaperone|NULL|Alpha crystallin/Hsp20 domain		TRUE
1_1904056_TCGCG_T	0.226455	0.350823	0.485363	0.196116	0.196116	0.438529	0.622752	0.196116	0.196116	0.681385	0.339683	0.138675	0.226455	0.532181	0.858754	0.138675	0.392232	0.392232	0.196116	0.518875	0.920737	0.196116	Sample_151:0/1;Sample_1540:0/1;Sample_1799:0/1;Sample_1825:0/1;Sample_185:0/1;Sample_282:0/1;Sample_320:0/1;Sample_421:0/1;Sample_422:0/1;Sample_423:0/1;Sample_424:0/1;Sample_425:0/1;Sample_426:0/1;Sample_427:0/1;Sample_433:0/1;Sample_434:0/1;Sample_435:0/1;Sample_436:1/1;Sample_437:0/1;Sample_498:0/1;Sample_504:0/1;Sample_599:0/1;Sample_748:0/1;Sample_831:0/1;Sample_B-8274:0/1;Sample_B-8323:0/1	1	1904056	1904060	5	TCGCG	T	frameshift_variant	HIGH	CORT_0A08600	CPAR2_209310	orf19.815	YLR422W	YLR422W,DCK1	c.3598_3601delCGCG	p.Arg1200fs	3601/5718	1200/1905	(CORT_0A08600|CORT_0A08600|1|1.00)	putative guanine nucleotide exchange factor required for embedded filamentous growth	;filamentous growth: decreased;heterozygous transposon insertion|;invasive growth: absent;|;competitive fitness: normal;R\I score is the median log2(R/I) value representing abundance of the mutant in recovered pool relative to inoculum|;colony appearance: abnormal;Morphology (M) score represents relative sizes of central and peripheral regions of colony|;viable;heterozygous transposon insertion|;…	NULL|Dedicator of cytokinesis C-terminal|Dedicator of cytokinesis	|Molecular Function: guanyl-nucleotide exchange factor activity (GO:0005085), Biological Process: small GTPase mediated signal transduction (GO:0007264)	FALSE
1_1910127_CTA_C	0.246183	0.286039	0.452267	0.213201	0.213201	0.381385	0.553912	0.213201	0	0.626783	0.369274	0.150756	0.246183	0.514259	0.755742	0.150756	0.426401	0.426401	0.213201	0.564076	0.913908	0.213201	Sample_151:0/1;Sample_1540:0/1;Sample_1799:0/1;Sample_1825:0/1;Sample_185:0/1;Sample_282:0/1;Sample_320:0/1;Sample_421:0/1;Sample_422:0/1;Sample_423:0/1;Sample_425:0/1;Sample_433:0/1;Sample_434:0/1;Sample_436:1/1;Sample_437:0/1;Sample_498:0/1;Sample_504:0/1;Sample_599:0/1;Sample_748:0/1;Sample_831:0/1;Sample_B-8274:0/1;Sample_B-8323:0/1	1	1910127	1910129	3	CTA	C	frameshift_variant	HIGH	CORT_0A08610	CPAR2_209340	orf19.814	YDR160W	SSY1,SSY1	c.303_304delTA	p.Ser102fs	304/2328	101/775	(CORT_0A08610|CORT_0A08610|1|1.00)	predicted amino acid sensor	L-glutamic acid gamma-hydrazide;resistance to chemicals: increased;|;small molecule transport: normal;histidine-activated amino acid transport|;small molecule transport: abnormal;histidine-activated amino acid transport is blocked|;protein/peptide modification: absent;Stp2p and Stp3p are not proteolytically processed in response to amino acids, as in wild type|;hyphal growth: decreased;|;hyphal g…	Amino acid permease domain|Amino acid/polyamine transporter I|NULL	Biological Process: transport (GO:0006810), Cellular Component: membrane (GO:0016020), Biological Process: transmembrane transport (GO:0055085)|Biological Process: amino acid transmembrane transport (GO:0003333), Molecular Function: amino acid transmembrane transporter activity (GO:0015171), Cellular Component: membrane (GO:0016020)|	TRUE
1_1910130_C_CGT	0.246183	0.286039	0.452267	0.213201	0.213201	0.381385	0.553912	0.213201	0	0.626783	0.369274	0.150756	0.246183	0.514259	0.755742	0.150756	0.426401	0.426401	0.213201	0.564076	0.913908	0.213201	Sample_151:0/1;Sample_1540:0/1;Sample_1799:0/1;Sample_1825:0/1;Sample_185:0/1;Sample_282:0/1;Sample_320:0/1;Sample_421:0/1;Sample_422:0/1;Sample_423:0/1;Sample_425:0/1;Sample_433:0/1;Sample_434:0/1;Sample_436:1/1;Sample_437:0/1;Sample_498:0/1;Sample_504:0/1;Sample_599:0/1;Sample_748:0/1;Sample_831:0/1;Sample_B-8274:0/1;Sample_B-8323:0/1	1	1910130	1910130	1	C	CGT	frameshift_variant	HIGH	CORT_0A08610	CPAR2_209340	orf19.814	YDR160W	SSY1,SSY1	c.301_302insAC	p.Gly101fs	301/2328	101/775	(CORT_0A08610|CORT_0A08610|1|1.00)	predicted amino acid sensor	L-glutamic acid gamma-hydrazide;resistance to chemicals: increased;|;small molecule transport: normal;histidine-activated amino acid transport|;small molecule transport: abnormal;histidine-activated amino acid transport is blocked|;protein/peptide modification: absent;Stp2p and Stp3p are not proteolytically processed in response to amino acids, as in wild type|;hyphal growth: decreased;|;hyphal g…	Amino acid permease domain|Amino acid/polyamine transporter I|NULL	Biological Process: transport (GO:0006810), Cellular Component: membrane (GO:0016020), Biological Process: transmembrane transport (GO:0055085)|Biological Process: amino acid transmembrane transport (GO:0003333), Molecular Function: amino acid transmembrane transporter activity (GO:0015171), Cellular Component: membrane (GO:0016020)|	TRUE
1_1921451_G_GTGGAT	0.327327	0.422577	0.534522	0.188982	0.188982	0.422577	0.654654	0.188982	0.188982	0.707107	0.327327	0.267261	0.327327	0.626783	0.906327	0.267261	0.377964	0.377964	0.188982	0.5	0.92582	0.188982	Sample_151:1/1;Sample_1540:1/1;Sample_1799:1/1;Sample_1825:1/1;Sample_185:1/1;Sample_282:1/1;Sample_320:1/1;Sample_421:1/1;Sample_422:1/1;Sample_423:1/1;Sample_424:1/1;Sample_425:1/1;Sample_426:1/1;Sample_427:1/1;Sample_428:1/1;Sample_433:1/1;Sample_434:1/1;Sample_435:1/1;Sample_436:1/1;Sample_437:1/1;Sample_498:1/1;Sample_504:1/1;Sample_599:1/1;Sample_748:1/1;Sample_831:1/1;Sample_B-8274:1/1;Sam…	1	1921451	1921451	1	G	GTGGAT	frameshift_variant	HIGH	CORT_0A08670	CPAR2_209400	orf19.3573	YNL329C	PEX6,PEX6	c.3_4insATCCA	p.Gln2fs	3282-03-01	1/1093	character(0)	S. cerevisiae homolog PEX6 has ATPase activity, protein heterodimerization activity and has role in protein import into peroxisome matrix, receptor recycling, replicative cell aging	;viable;	NULL|AAA+ ATPase domain|ATPase, AAA-type, conserved site|ATPase, AAA-type, core	|Molecular Function: nucleotide binding (GO:0000166), Molecular Function: nucleoside-triphosphatase activity (GO:0017111)|Molecular Function: ATP binding (GO:0005524)	FALSE
1_1936916_T_TCG	0.23094	0.357771	0.424264	0.2	0.2	0.357771	0.57735	0.2	0.2	0.641427	0.34641	0.141421	0.23094	0.54272	0.834058	0.141421	0.3	0.3	0.2	0.453557	0.898146	0.2	Sample_151:0/1;Sample_1540:0/1;Sample_1799:0/1;Sample_1825:0/1;Sample_185:0/1;Sample_282:0/1;Sample_320:0/1;Sample_421:0/1;Sample_422:0/1;Sample_423:0/1;Sample_424:0/1;Sample_425:0/1;Sample_426:0/1;Sample_427:0/1;Sample_433:0/1;Sample_434:0/1;Sample_435:0/1;Sample_437:0/1;Sample_498:0/1;Sample_504:0/1;Sample_599:0/1;Sample_748:0/1;Sample_831:0/1;Sample_B-8274:0/1;Sample_B-8323:0/1	1	1936916	1936916	1	T	TCG	frameshift_variant	HIGH	CORT_0A08760	CPAR2_209490	orf19.6885	YAL009W	,SPO7	c.569_570insCG	p.Met191fs	570/1479	190/492	(CORT_0A08760|CORT_0A08760|1|1.00)	protein similar to S. cerevisiae Spo7p	NA	Sporulation/nuclear morphology, Spo7|NULL		TRUE
1_1936918_ATG_A	0.23094	0.357771	0.424264	0.2	0.2	0.357771	0.57735	0.2	0.2	0.641427	0.34641	0.141421	0.23094	0.54272	0.834058	0.141421	0.3	0.3	0.2	0.453557	0.898146	0.2	Sample_151:0/1;Sample_1540:0/1;Sample_1799:0/1;Sample_1825:0/1;Sample_185:0/1;Sample_282:0/1;Sample_320:0/1;Sample_421:0/1;Sample_422:0/1;Sample_423:0/1;Sample_424:0/1;Sample_425:0/1;Sample_426:0/1;Sample_427:0/1;Sample_433:0/1;Sample_434:0/1;Sample_435:0/1;Sample_437:0/1;Sample_498:0/1;Sample_504:0/1;Sample_599:0/1;Sample_748:0/1;Sample_831:0/1;Sample_B-8274:0/1;Sample_B-8323:0/1	1	1936918	1936920	3	ATG	A	frameshift_variant	HIGH	CORT_0A08760	CPAR2_209490	orf19.6885	YAL009W	,SPO7	c.573_574delGT	p.Met191fs	573/1479	191/492	(CORT_0A08760|CORT_0A08760|1|1.00)	protein similar to S. cerevisiae Spo7p	NA	Sporulation/nuclear morphology, Spo7|NULL		TRUE
1_1955016_GT_G	0.23094	0.357771	0.424264	0.2	0.2	0.357771	0.57735	0.2	0.2	0.641427	0.34641	0.141421	0.23094	0.54272	0.834058	0.141421	0.3	0.3	0.2	0.453557	0.898146	0.2	Sample_151:1/1;Sample_1540:0/1;Sample_1799:1/1;Sample_1825:0/1;Sample_185:1/1;Sample_282:0/1;Sample_320:0/1;Sample_421:0/1;Sample_422:0/1;Sample_423:1/1;Sample_424:0/1;Sample_425:0/1;Sample_426:1/1;Sample_427:1/1;Sample_433:0/1;Sample_434:1/1;Sample_435:0/1;Sample_437:0/1;Sample_498:0/1;Sample_504:1/1;Sample_599:1/1;Sample_748:0/1;Sample_831:1/1;Sample_B-8274:0/1;Sample_B-8323:0/1	1	1955016	1955017	2	GT	G	frameshift_variant	HIGH	CORT_0A08840	CPAR2_209570	orf19.4125	YPR186C	PZF1,PZF1	c.1273delA	p.Thr425fs	1273/1293	425/430	character(0)	putative transcription factor with zinc finger DNA-binding motif	;viable;|;viable;|;viable;|;biofilm formation: normal;|;virulence: normal;|;invasive growth: decreased;	NULL|Zinc finger, C2H2|Zinc finger, C2H2-like|Zinc finger C2H2-type/integrase DNA-binding domain	|Molecular Function: zinc ion binding (GO:0008270)|Cellular Component: intracellular (GO:0005622), Molecular Function: zinc ion binding (GO:0008270)|Molecular Function: nucleic acid binding (GO:0003676)	FALSE
1_1968514_AG_A	0.23094	0.357771	0.424264	0.2	0.2	0.357771	0.57735	0.2	0.2	0.641427	0.34641	0.141421	0.23094	0.54272	0.834058	0.141421	0.3	0.3	0.2	0.453557	0.898146	0.2	Sample_151:0/1;Sample_1540:0/1;Sample_1799:1/1;Sample_1825:0/1;Sample_185:0/1;Sample_282:0/1;Sample_320:0/1;Sample_421:0/1;Sample_422:0/1;Sample_423:1/1;Sample_424:0/1;Sample_425:0/1;Sample_426:1/1;Sample_427:1/1;Sample_433:0/1;Sample_434:1/1;Sample_435:0/1;Sample_437:0/1;Sample_498:0/1;Sample_504:1/1;Sample_599:0/1;Sample_748:0/1;Sample_831:1/1;Sample_B-8274:0/1;Sample_B-8323:0/1	1	1968514	1968515	2	AG	A	frameshift_variant	HIGH	CORT_0A08920	CPAR2_209650	orf19.190	YAL011W	,SWC3	c.1791delC	p.Ser598fs	1791/2469	597/822	(CORT_0A08920|CORT_0A08920|1|1.00)	hypothetical protein	NA	NA	NA	TRUE
1_1968519_T_TA	0.23094	0.357771	0.424264	0.2	0.2	0.357771	0.57735	0.2	0.2	0.641427	0.34641	0.141421	0.23094	0.54272	0.834058	0.141421	0.3	0.3	0.2	0.453557	0.898146	0.2	Sample_151:0/1;Sample_1540:0/1;Sample_1799:1/1;Sample_1825:0/1;Sample_185:0/1;Sample_282:0/1;Sample_320:0/1;Sample_421:0/1;Sample_422:0/1;Sample_423:1/1;Sample_424:0/1;Sample_425:0/1;Sample_426:1/1;Sample_427:1/1;Sample_433:0/1;Sample_434:1/1;Sample_435:0/1;Sample_437:0/1;Sample_498:0/1;Sample_504:1/1;Sample_599:0/1;Sample_748:0/1;Sample_831:1/1;Sample_B-8274:0/1;Sample_B-8323:0/1	1	1968519	1968519	1	T	TA	frameshift_variant	HIGH	CORT_0A08920	CPAR2_209650	orf19.190	YAL011W	,SWC3	c.1786_1787insT	p.Lys596fs	1786/2469	596/822	(CORT_0A08920|CORT_0A08920|1|1.00)	hypothetical protein	NA	NA	NA	TRUE
1_1970737_GATGATGAT_G	0.23094	0.357771	0.424264	0.2	0.2	0.357771	0.57735	0.2	0.2	0.641427	0.34641	0.141421	0.23094	0.54272	0.834058	0.141421	0.3	0.3	0.2	0.453557	0.898146	0.2	Sample_151:0/1;Sample_1540:0/1;Sample_1799:1/1;Sample_1825:0/1;Sample_185:0/1;Sample_282:0/1;Sample_320:0/1;Sample_421:0/1;Sample_422:0/1;Sample_423:1/1;Sample_424:0/1;Sample_425:0/1;Sample_426:1/1;Sample_427:1/1;Sample_433:0/1;Sample_434:1/1;Sample_435:0/1;Sample_437:0/1;Sample_498:0/1;Sample_504:1/1;Sample_599:0/1;Sample_748:0/1;Sample_831:1/1;Sample_B-8274:0/1;Sample_B-8323:0/1	1	1970737	1970745	9	GATGATGAT	G	frameshift_variant	HIGH	CORT_0A08930	CPAR2_209660	orf19.191	YHR102W	KIC1,KIC1	c.2201_2208delATCATCAT	p.His734fs	2208/2445	734/814	(CORT_0A08930|CORT_0A08930|1|1.00)	member of the GCK-III subfamily of eukaryotic Ste20p kinases	Calcofluor White;resistance to chemicals: decreased;|itraconazole;resistance to chemicals: decreased;sensitivity is intermediate between that of the homozygous null mutant and wild type|itraconazole;resistance to chemicals: decreased;|sodium dodecyl sulfate;resistance to chemicals: decreased;|;hyphal growth: decreased;|;vegetative growth: decreased rate;|;viable;URA3-blaster technique|;viable;URA…	Serine/threonine-protein kinase, active site|NULL|Protein kinase-like domain|Protein kinase, catalytic domain|Protein kinase, ATP binding site|Serine/threonine- / dual-specificity protein kinase, catalytic domain	Molecular Function: protein serine/threonine kinase activity (GO:0004674), Biological Process: protein phosphorylation (GO:0006468)||Molecular Function: transferase activity, transferring phosphorus-containing groups (GO:0016772)|Molecular Function: protein kinase activity (GO:0004672), Molecular Function: ATP binding (GO:0005524), Biological Process: protein phosphorylation (GO:0006468)|Molecula…	TRUE
1_1970747_GA_G	0.23094	0.357771	0.424264	0.2	0.2	0.357771	0.57735	0.2	0.2	0.641427	0.34641	0.141421	0.23094	0.54272	0.834058	0.141421	0.3	0.3	0.2	0.453557	0.898146	0.2	Sample_151:0/1;Sample_1540:0/1;Sample_1799:1/1;Sample_1825:0/1;Sample_185:0/1;Sample_282:0/1;Sample_320:0/1;Sample_421:0/1;Sample_422:0/1;Sample_423:1/1;Sample_424:0/1;Sample_425:0/1;Sample_426:1/1;Sample_427:1/1;Sample_433:0/1;Sample_434:1/1;Sample_435:0/1;Sample_437:0/1;Sample_498:0/1;Sample_504:1/1;Sample_599:0/1;Sample_748:0/1;Sample_831:1/1;Sample_B-8274:0/1;Sample_B-8323:0/1	1	1970747	1970748	2	GA	G	frameshift_variant	HIGH	CORT_0A08930	CPAR2_209660	orf19.191	YHR102W	KIC1,KIC1	c.2198delT	p.Ile733fs	2198/2445	733/814	(CORT_0A08930|CORT_0A08930|1|1.00)	member of the GCK-III subfamily of eukaryotic Ste20p kinases	Calcofluor White;resistance to chemicals: decreased;|itraconazole;resistance to chemicals: decreased;sensitivity is intermediate between that of the homozygous null mutant and wild type|itraconazole;resistance to chemicals: decreased;|sodium dodecyl sulfate;resistance to chemicals: decreased;|;hyphal growth: decreased;|;vegetative growth: decreased rate;|;viable;URA3-blaster technique|;viable;URA…	Serine/threonine-protein kinase, active site|NULL|Protein kinase-like domain|Protein kinase, catalytic domain|Protein kinase, ATP binding site|Serine/threonine- / dual-specificity protein kinase, catalytic domain	Molecular Function: protein serine/threonine kinase activity (GO:0004674), Biological Process: protein phosphorylation (GO:0006468)||Molecular Function: transferase activity, transferring phosphorus-containing groups (GO:0016772)|Molecular Function: protein kinase activity (GO:0004672), Molecular Function: ATP binding (GO:0005524), Biological Process: protein phosphorylation (GO:0006468)|Molecula…	TRUE
1_1972760_G_GC	0.240772	0.373002	0.368605	0.208514	0.208514	0.373002	0.601929	0.208514	0.208514	0.668734	0.240772	0.147442	0.240772	0.565825	0.826087	0.147442	0.104257	0.104257	0.208514	0.315244	0.851257	0.208514	Sample_151:0/1;Sample_1540:0/1;Sample_1799:1/1;Sample_1825:0/1;Sample_185:0/1;Sample_282:0/1;Sample_320:0/1;Sample_421:0/1;Sample_422:0/1;Sample_423:1/1;Sample_424:0/1;Sample_425:0/1;Sample_426:1/1;Sample_427:1/1;Sample_433:0/1;Sample_434:1/1;Sample_435:0/1;Sample_437:0/1;Sample_498:0/1;Sample_599:0/1;Sample_748:0/1;Sample_B-8274:0/1;Sample_B-8323:0/1	1	1972760	1972760	1	G	GC	frameshift_variant	HIGH	CORT_0A08930	CPAR2_209660	orf19.191	YHR102W	KIC1,KIC1	c.185_186insG	p.Asn62fs	185/2445	62/814	(CORT_0A08930|CORT_0A08930|1|1.00)	member of the GCK-III subfamily of eukaryotic Ste20p kinases	Calcofluor White;resistance to chemicals: decreased;|itraconazole;resistance to chemicals: decreased;sensitivity is intermediate between that of the homozygous null mutant and wild type|itraconazole;resistance to chemicals: decreased;|sodium dodecyl sulfate;resistance to chemicals: decreased;|;hyphal growth: decreased;|;vegetative growth: decreased rate;|;viable;URA3-blaster technique|;viable;URA…	Serine/threonine-protein kinase, active site|NULL|Protein kinase-like domain|Protein kinase, catalytic domain|Protein kinase, ATP binding site|Serine/threonine- / dual-specificity protein kinase, catalytic domain	Molecular Function: protein serine/threonine kinase activity (GO:0004674), Biological Process: protein phosphorylation (GO:0006468)||Molecular Function: transferase activity, transferring phosphorus-containing groups (GO:0016772)|Molecular Function: protein kinase activity (GO:0004672), Molecular Function: ATP binding (GO:0005524), Biological Process: protein phosphorylation (GO:0006468)|Molecula…	TRUE
1_1972763_CT_C	0.240772	0.373002	0.368605	0.208514	0.208514	0.373002	0.601929	0.208514	0.208514	0.668734	0.240772	0.147442	0.240772	0.565825	0.826087	0.147442	0.104257	0.104257	0.208514	0.315244	0.851257	0.208514	Sample_151:0/1;Sample_1540:0/1;Sample_1799:1/1;Sample_1825:0/1;Sample_185:0/1;Sample_282:0/1;Sample_320:0/1;Sample_421:0/1;Sample_422:0/1;Sample_423:1/1;Sample_424:0/1;Sample_425:0/1;Sample_426:1/1;Sample_427:1/1;Sample_433:0/1;Sample_434:1/1;Sample_435:0/1;Sample_437:0/1;Sample_498:0/1;Sample_599:0/1;Sample_748:0/1;Sample_B-8274:0/1;Sample_B-8323:0/1	1	1972763	1972764	2	CT	C	frameshift_variant	HIGH	CORT_0A08930	CPAR2_209660	orf19.191	YHR102W	KIC1,KIC1	c.182delA	p.Lys61fs	182/2445	61/814	(CORT_0A08930|CORT_0A08930|1|1.00)	member of the GCK-III subfamily of eukaryotic Ste20p kinases	Calcofluor White;resistance to chemicals: decreased;|itraconazole;resistance to chemicals: decreased;sensitivity is intermediate between that of the homozygous null mutant and wild type|itraconazole;resistance to chemicals: decreased;|sodium dodecyl sulfate;resistance to chemicals: decreased;|;hyphal growth: decreased;|;vegetative growth: decreased rate;|;viable;URA3-blaster technique|;viable;URA…	Serine/threonine-protein kinase, active site|NULL|Protein kinase-like domain|Protein kinase, catalytic domain|Protein kinase, ATP binding site|Serine/threonine- / dual-specificity protein kinase, catalytic domain	Molecular Function: protein serine/threonine kinase activity (GO:0004674), Biological Process: protein phosphorylation (GO:0006468)||Molecular Function: transferase activity, transferring phosphorus-containing groups (GO:0016772)|Molecular Function: protein kinase activity (GO:0004672), Molecular Function: ATP binding (GO:0005524), Biological Process: protein phosphorylation (GO:0006468)|Molecula…	TRUE
1_1979105_GA_G	0.333333	0.430331	0.544331	0.19245	0.19245	0.430331	0.611111	0.19245	0.19245	0.668648	0.333333	0.272166	0.333333	0.580259	0.88283	0.136083	0.3849	0.3849	0.19245	0.509175	0.942809	0.19245	Sample_151:0/1;Sample_1540:0/1;Sample_1799:0/1;Sample_1825:0/1;Sample_185:0/1;Sample_282:0/1;Sample_320:0/1;Sample_421:0/1;Sample_422:0/1;Sample_423:0/1;Sample_424:0/1;Sample_425:0/1;Sample_426:0/1;Sample_427:1/1;Sample_428:1/1;Sample_433:0/1;Sample_434:0/1;Sample_435:1/1;Sample_436:1/1;Sample_437:0/1;Sample_498:0/1;Sample_504:0/1;Sample_599:0/1;Sample_748:0/1;Sample_831:0/1;Sample_B-8274:1/1;Sam…	1	1979105	1979106	2	GA	G	frameshift_variant	HIGH	CORT_0A08960	CPAR2_209700	---	---		c.154delA	p.Arg52fs	154/1572	52/523	(CORT_0A08960|CORT_0A08960|1|1.00)	hypothetical protein	NA	NULL|Major facilitator superfamily|Major facilitator superfamily domain, general substrate transporter	|Cellular Component: integral to membrane (GO:0016021), Biological Process: transmembrane transport (GO:0055085)	TRUE
1_1979108_A_AG	0.333333	0.430331	0.544331	0.19245	0.19245	0.430331	0.611111	0.19245	0.19245	0.668648	0.333333	0.272166	0.333333	0.580259	0.88283	0.136083	0.3849	0.3849	0.19245	0.509175	0.942809	0.19245	Sample_151:0/1;Sample_1540:0/1;Sample_1799:0/1;Sample_1825:0/1;Sample_185:0/1;Sample_282:0/1;Sample_320:0/1;Sample_421:0/1;Sample_422:0/1;Sample_423:0/1;Sample_424:0/1;Sample_425:0/1;Sample_426:0/1;Sample_427:1/1;Sample_428:1/1;Sample_433:0/1;Sample_434:0/1;Sample_435:1/1;Sample_436:1/1;Sample_437:0/1;Sample_498:0/1;Sample_504:0/1;Sample_599:0/1;Sample_748:0/1;Sample_831:0/1;Sample_B-8274:1/1;Sam…	1	1979108	1979108	1	A	AG	frameshift_variant	HIGH	CORT_0A08960	CPAR2_209700	---	---		c.156_157insG	p.Phe53fs	157/1572	53/523	(CORT_0A08960|CORT_0A08960|1|1.00)	hypothetical protein	NA	NULL|Major facilitator superfamily|Major facilitator superfamily domain, general substrate transporter	|Cellular Component: integral to membrane (GO:0016021), Biological Process: transmembrane transport (GO:0055085)	TRUE
1_1979129_CG_C	0.129099	0.3	0.474342	0	0	0.3	0.451848	0.223607	0	0.537853	0.387298	0.158114	0.129099	0.40452	0.746004	0.158114	0.33541	0.33541	0.223607	0.507093	0.867227	0.223607	Sample_151:0/1;Sample_1540:0/1;Sample_1799:0/1;Sample_1825:0/1;Sample_185:0/1;Sample_282:0/1;Sample_320:0/1;Sample_421:0/1;Sample_422:0/1;Sample_424:0/1;Sample_425:0/1;Sample_426:0/1;Sample_433:0/1;Sample_434:0/1;Sample_437:0/1;Sample_504:0/1;Sample_599:0/1;Sample_748:0/1;Sample_831:0/1;Sample_B-8323:0/1	1	1979129	1979130	2	CG	C	frameshift_variant	HIGH	CORT_0A08960	CPAR2_209700	---	---		c.178delG	p.Glu60fs	178/1572	60/523	(CORT_0A08960|CORT_0A08960|1|1.00)	hypothetical protein	NA	NULL|Major facilitator superfamily|Major facilitator superfamily domain, general substrate transporter	|Cellular Component: integral to membrane (GO:0016021), Biological Process: transmembrane transport (GO:0055085)	FALSE
1_2021894_TG_T	0.120386	0.0932505	0.368605	0	0	0.466252	0.662122	0.208514	0.208514	0.724462	0.361158	0	0	0.377217	0.782609	0.147442	0.417029	0.417029	0.208514	0.472866	0.893819	0.208514	Sample_151:0/1;Sample_1540:0/1;Sample_1825:0/1;Sample_185:0/1;Sample_282:0/1;Sample_320:0/1;Sample_421:0/1;Sample_422:0/1;Sample_424:0/1;Sample_425:0/1;Sample_426:0/1;Sample_427:0/1;Sample_433:0/1;Sample_435:0/1;Sample_436:1/1;Sample_437:0/1;Sample_498:0/1;Sample_504:0/1;Sample_599:0/1;Sample_748:0/1;Sample_831:0/1;Sample_B-8274:0/1;Sample_B-8323:0/1	1	2021894	2021895	2	TG	T	frameshift_variant	HIGH	CORT_0A09120	CPAR2_209860	orf19.5214	YLR396C	,VPS33	c.1067delG	p.Gly356fs	1067/2085	356/694	(CORT_0A09120|CORT_0A09120|1|1.00)	similar to C. parapsilosis CPAR2_209860 and C. albicans VPS33similar to S. cerevisiae VPS33	NA	NULL|Sec1-like protein	|Biological Process: vesicle docking involved in exocytosis (GO:0006904), Biological Process: vesicle-mediated transport (GO:0016192)	TRUE
1_2021897_AGGAGGAGGAGG_A	0.120386	0.0932505	0.368605	0	0	0.466252	0.662122	0.208514	0.208514	0.724462	0.361158	0	0	0.377217	0.782609	0.147442	0.417029	0.417029	0.208514	0.472866	0.893819	0.208514	Sample_151:0/1;Sample_1540:0/1;Sample_1825:0/1;Sample_185:0/1;Sample_282:0/1;Sample_320:0/1;Sample_421:0/1;Sample_422:0/1;Sample_424:0/1;Sample_425:0/1;Sample_426:0/1;Sample_427:0/1;Sample_433:0/1;Sample_435:0/1;Sample_436:1/1;Sample_437:0/1;Sample_498:0/1;Sample_504:0/1;Sample_599:0/1;Sample_748:0/1;Sample_831:0/1;Sample_B-8274:0/1;Sample_B-8323:0/1	1	2021897	2021908	12	AGGAGGAGGAGG	A	frameshift_variant	HIGH	CORT_0A09120	CPAR2_209860	orf19.5214	YLR396C	,VPS33	c.1069_1079delGGAGGAGGAGG	p.Gly357fs	1069/2085	357/694	(CORT_0A09120|CORT_0A09120|1|1.00)	similar to C. parapsilosis CPAR2_209860 and C. albicans VPS33similar to S. cerevisiae VPS33	NA	NULL|Sec1-like protein	|Biological Process: vesicle docking involved in exocytosis (GO:0006904), Biological Process: vesicle-mediated transport (GO:0016192)	TRUE
1_2062540_T_TTC	0.120386	0.0932505	0.368605	0	0	0.466252	0.662122	0.208514	0.208514	0.724462	0.361158	0	0	0.377217	0.782609	0.147442	0.417029	0.417029	0.208514	0.472866	0.893819	0.208514	Sample_151:1/1;Sample_1540:0/1;Sample_1825:0/1;Sample_185:1/1;Sample_282:0/1;Sample_320:0/1;Sample_421:0/1;Sample_422:0/1;Sample_424:0/1;Sample_425:0/1;Sample_426:0/1;Sample_427:0/1;Sample_433:0/1;Sample_435:0/1;Sample_436:1/1;Sample_437:0/1;Sample_498:0/1;Sample_504:0/1;Sample_599:1/1;Sample_748:0/1;Sample_831:0/1;Sample_B-8274:0/1;Sample_B-8323:1/1	1	2062540	2062540	1	T	TTC	frameshift_variant	HIGH	CORT_0A09350	CPAR2_210090	orf19.3523	YPR161C	SGV1,CRK1	c.1973_1974dupTC	p.Pro659fs	1975/3177	659/1058	(CORT_0A09350|CORT_0A09350|1|1.00)	protein kinase of the Cdc2 subfamily	;flocculation: increased;|;hyphal growth: abnormal;grows hyphally while wild type is yeast-form under these conditions|;hyphal growth: decreased;|;viable;one allele is deleted and the other is placed under repressible Tet promoter|;viable;|;viable;|;virulence: decreased;	Serine/threonine-protein kinase, active site|NULL|Protein kinase-like domain|Protein kinase, catalytic domain|Protein kinase, ATP binding site|Serine/threonine- / dual-specificity protein kinase, catalytic domain	Molecular Function: protein serine/threonine kinase activity (GO:0004674), Biological Process: protein phosphorylation (GO:0006468)||Molecular Function: transferase activity, transferring phosphorus-containing groups (GO:0016772)|Molecular Function: protein kinase activity (GO:0004672), Molecular Function: ATP binding (GO:0005524), Biological Process: protein phosphorylation (GO:0006468)|Molecula…	TRUE
1_2062544_CTT_C	0.120386	0.0932505	0.368605	0	0	0.466252	0.662122	0.208514	0.208514	0.724462	0.361158	0	0	0.377217	0.782609	0.147442	0.417029	0.417029	0.208514	0.472866	0.893819	0.208514	Sample_151:1/1;Sample_1540:0/1;Sample_1825:0/1;Sample_185:1/1;Sample_282:0/1;Sample_320:0/1;Sample_421:0/1;Sample_422:0/1;Sample_424:0/1;Sample_425:0/1;Sample_426:0/1;Sample_427:0/1;Sample_433:0/1;Sample_435:0/1;Sample_436:1/1;Sample_437:0/1;Sample_498:0/1;Sample_504:0/1;Sample_599:1/1;Sample_748:0/1;Sample_831:0/1;Sample_B-8274:0/1;Sample_B-8323:1/1	1	2062544	2062546	3	CTT	C	frameshift_variant	HIGH	CORT_0A09350	CPAR2_210090	orf19.3523	YPR161C	SGV1,CRK1	c.1977_1978delTT	p.Ser660fs	1977/3177	659/1058	(CORT_0A09350|CORT_0A09350|1|1.00)	protein kinase of the Cdc2 subfamily	;flocculation: increased;|;hyphal growth: abnormal;grows hyphally while wild type is yeast-form under these conditions|;hyphal growth: decreased;|;viable;one allele is deleted and the other is placed under repressible Tet promoter|;viable;|;viable;|;virulence: decreased;	Serine/threonine-protein kinase, active site|NULL|Protein kinase-like domain|Protein kinase, catalytic domain|Protein kinase, ATP binding site|Serine/threonine- / dual-specificity protein kinase, catalytic domain	Molecular Function: protein serine/threonine kinase activity (GO:0004674), Biological Process: protein phosphorylation (GO:0006468)||Molecular Function: transferase activity, transferring phosphorus-containing groups (GO:0016772)|Molecular Function: protein kinase activity (GO:0004672), Molecular Function: ATP binding (GO:0005524), Biological Process: protein phosphorylation (GO:0006468)|Molecula…	TRUE
1_2068231_T_TATCAA	0	0	0	0	0	0.447214	0.288675	0	1	0.267261	0	0	0	0.301511	0.208514	0	0	0	0	0	0	0	Sample_435:0/1	1	2068231	2068231	1	T	TATCAA	frameshift_variant	HIGH	CORT_0A09370	CPAR2_210110	---	---		c.605_606insATCAA	p.Leu204fs	606/2241	202/746	(CORT_0A09370|CORT_0A09370|1|1.00)	hypothetical protein	NA	Riboflavin synthase-like beta-barrel|Ferredoxin reductase-type FAD-binding domain|Ferric reductase, NAD binding|NULL|Ferric reductase transmembrane component-like domain|FAD-binding 8	Molecular Function: oxidoreductase activity (GO:0016491), Biological Process: oxidation-reduction process (GO:0055114)|	FALSE
1_2068773_GCC_G	0.333333	0.430331	0.544331	0.19245	0.19245	0.430331	0.611111	0.19245	0.19245	0.668648	0.333333	0.272166	0.333333	0.580259	0.88283	0.136083	0.3849	0.3849	0.19245	0.509175	0.942809	0.19245	Sample_151:0/1;Sample_1540:0/1;Sample_1799:0/1;Sample_1825:0/1;Sample_185:0/1;Sample_282:0/1;Sample_320:0/1;Sample_421:0/1;Sample_422:0/1;Sample_423:0/1;Sample_424:0/1;Sample_425:0/1;Sample_426:0/1;Sample_427:0/1;Sample_428:1/1;Sample_433:0/1;Sample_434:0/1;Sample_435:0/1;Sample_436:0/1;Sample_437:0/1;Sample_498:0/1;Sample_504:0/1;Sample_599:0/1;Sample_748:0/1;Sample_831:0/1;Sample_B-8274:0/1;Sam…	1	2068773	2068775	3	GCC	G	frameshift_variant	HIGH	CORT_0A09370	CPAR2_210110	---	---		c.1148_1149delCC	p.Ala383fs	1148/2241	383/746	(CORT_0A09370|CORT_0A09370|1|1.00)	hypothetical protein	NA	Riboflavin synthase-like beta-barrel|Ferredoxin reductase-type FAD-binding domain|Ferric reductase, NAD binding|NULL|Ferric reductase transmembrane component-like domain|FAD-binding 8	Molecular Function: oxidoreductase activity (GO:0016491), Biological Process: oxidation-reduction process (GO:0055114)|	TRUE
1_2068778_T_TTC	0.333333	0.430331	0.544331	0.19245	0.19245	0.430331	0.611111	0.19245	0.19245	0.668648	0.333333	0.272166	0.333333	0.580259	0.88283	0.136083	0.3849	0.3849	0.19245	0.509175	0.942809	0.19245	Sample_151:0/1;Sample_1540:0/1;Sample_1799:0/1;Sample_1825:0/1;Sample_185:0/1;Sample_282:0/1;Sample_320:0/1;Sample_421:0/1;Sample_422:0/1;Sample_423:0/1;Sample_424:0/1;Sample_425:0/1;Sample_426:0/1;Sample_427:0/1;Sample_428:1/1;Sample_433:0/1;Sample_434:0/1;Sample_435:0/1;Sample_436:0/1;Sample_437:0/1;Sample_498:0/1;Sample_504:0/1;Sample_599:0/1;Sample_748:0/1;Sample_831:0/1;Sample_B-8274:0/1;Sam…	1	2068778	2068778	1	T	TTC	frameshift_variant	HIGH	CORT_0A09370	CPAR2_210110	---	---		c.1153_1154insCT	p.Trp385fs	1154/2241	385/746	(CORT_0A09370|CORT_0A09370|1|1.00)	hypothetical protein	NA	Riboflavin synthase-like beta-barrel|Ferredoxin reductase-type FAD-binding domain|Ferric reductase, NAD binding|NULL|Ferric reductase transmembrane component-like domain|FAD-binding 8	Molecular Function: oxidoreductase activity (GO:0016491), Biological Process: oxidation-reduction process (GO:0055114)|	TRUE
1_2068783_C_CAA	0.333333	0.430331	0.544331	0.19245	0.19245	0.430331	0.611111	0.19245	0.19245	0.668648	0.333333	0.272166	0.333333	0.580259	0.88283	0.136083	0.3849	0.3849	0.19245	0.509175	0.942809	0.19245	Sample_151:0/1;Sample_1540:0/1;Sample_1799:0/1;Sample_1825:0/1;Sample_185:0/1;Sample_282:0/1;Sample_320:0/1;Sample_421:0/1;Sample_422:0/1;Sample_423:0/1;Sample_424:0/1;Sample_425:0/1;Sample_426:0/1;Sample_427:0/1;Sample_428:1/1;Sample_433:0/1;Sample_434:0/1;Sample_435:0/1;Sample_436:0/1;Sample_437:0/1;Sample_498:0/1;Sample_504:0/1;Sample_599:0/1;Sample_748:0/1;Sample_831:0/1;Sample_B-8274:0/1;Sam…	1	2068783	2068783	1	C	CAA	frameshift_variant	HIGH	CORT_0A09370	CPAR2_210110	---	---		c.1157_1158insAA	p.Ala387fs	1158/2241	386/746	(CORT_0A09370|CORT_0A09370|1|1.00)	hypothetical protein	NA	Riboflavin synthase-like beta-barrel|Ferredoxin reductase-type FAD-binding domain|Ferric reductase, NAD binding|NULL|Ferric reductase transmembrane component-like domain|FAD-binding 8	Molecular Function: oxidoreductase activity (GO:0016491), Biological Process: oxidation-reduction process (GO:0055114)|	TRUE
1_2068784_TGC_T	0.333333	0.430331	0.544331	0.19245	0.19245	0.430331	0.611111	0.19245	0.19245	0.668648	0.333333	0.272166	0.333333	0.580259	0.88283	0.136083	0.3849	0.3849	0.19245	0.509175	0.942809	0.19245	Sample_151:0/1;Sample_1540:0/1;Sample_1799:0/1;Sample_1825:0/1;Sample_185:0/1;Sample_282:0/1;Sample_320:0/1;Sample_421:0/1;Sample_422:0/1;Sample_423:0/1;Sample_424:0/1;Sample_425:0/1;Sample_426:0/1;Sample_427:0/1;Sample_428:1/1;Sample_433:0/1;Sample_434:0/1;Sample_435:0/1;Sample_436:0/1;Sample_437:0/1;Sample_498:0/1;Sample_504:0/1;Sample_599:0/1;Sample_748:0/1;Sample_831:0/1;Sample_B-8274:0/1;Sam…	1	2068784	2068786	3	TGC	T	frameshift_variant	HIGH	CORT_0A09370	CPAR2_210110	---	---		c.1159_1160delGC	p.Ala387fs	1159/2241	387/746	(CORT_0A09370|CORT_0A09370|1|1.00)	hypothetical protein	NA	Riboflavin synthase-like beta-barrel|Ferredoxin reductase-type FAD-binding domain|Ferric reductase, NAD binding|NULL|Ferric reductase transmembrane component-like domain|FAD-binding 8	Molecular Function: oxidoreductase activity (GO:0016491), Biological Process: oxidation-reduction process (GO:0055114)|	TRUE
1_2079113_AT_A	0.226455	0.350823	0.485363	0.196116	0.196116	0.438529	0.622752	0.196116	0.196116	0.681385	0.339683	0.138675	0.226455	0.532181	0.858754	0.138675	0.392232	0.392232	0.196116	0.518875	0.920737	0.196116	Sample_151:1/1;Sample_1540:1/1;Sample_1799:1/1;Sample_1825:1/1;Sample_185:1/1;Sample_282:0/1;Sample_320:0/1;Sample_421:1/1;Sample_422:1/1;Sample_423:1/1;Sample_424:1/1;Sample_425:1/1;Sample_426:1/1;Sample_427:1/1;Sample_433:1/1;Sample_434:1/1;Sample_435:1/1;Sample_436:1/1;Sample_437:1/1;Sample_498:0/1;Sample_504:1/1;Sample_599:1/1;Sample_748:0/1;Sample_831:1/1;Sample_B-8274:1/1;Sample_B-8323:1/1	1	2079113	2079114	2	AT	A	frameshift_variant	HIGH	CORT_0A09400	CPAR2_210120	---	---		c.26delT	p.Leu9fs	26/1014	9/337	character(0)	hypothetical protein	NA	NULL|Ferric reductase transmembrane component-like domain		FALSE
1_2080101_T_C	0.226455	0.350823	0.485363	0.196116	0.196116	0.438529	0.622752	0.196116	0.196116	0.681385	0.339683	0.138675	0.226455	0.532181	0.858754	0.138675	0.392232	0.392232	0.196116	0.518875	0.920737	0.196116	Sample_151:1/1;Sample_1540:1/1;Sample_1799:1/1;Sample_1825:1/1;Sample_185:1/1;Sample_282:0/1;Sample_320:0/1;Sample_421:1/1;Sample_422:1/1;Sample_423:1/1;Sample_424:1/1;Sample_425:1/1;Sample_426:1/1;Sample_427:1/1;Sample_433:1/1;Sample_434:1/1;Sample_435:1/1;Sample_436:1/1;Sample_437:1/1;Sample_498:0/1;Sample_504:1/1;Sample_599:1/1;Sample_748:0/1;Sample_831:1/1;Sample_B-8274:1/1;Sample_B-8323:1/1	1	2080101	2080101	1	T	C	stop_lost&splice_region_variant	HIGH	CORT_0A09400	CPAR2_210120	---	---		c.1012T>C	p.Ter338Glnext*?	1012/1014	338/337	character(0)	hypothetical protein	NA	NULL|Ferric reductase transmembrane component-like domain		TRUE
1_2080103_A_C	0.333333	0.430331	0.544331	0.19245	0.19245	0.430331	0.611111	0.19245	0.19245	0.668648	0.333333	0.272166	0.333333	0.580259	0.88283	0.136083	0.3849	0.3849	0.19245	0.509175	0.942809	0.19245	Sample_151:1/1;Sample_1540:1/1;Sample_1799:1/1;Sample_1825:1/1;Sample_185:1/1;Sample_282:0/1;Sample_320:0/1;Sample_421:1/1;Sample_422:1/1;Sample_423:1/1;Sample_424:1/1;Sample_425:1/1;Sample_426:1/1;Sample_427:1/1;Sample_428:1/1;Sample_433:1/1;Sample_434:1/1;Sample_435:1/1;Sample_436:1/1;Sample_437:1/1;Sample_498:0/1;Sample_504:1/1;Sample_599:1/1;Sample_748:0/1;Sample_831:1/1;Sample_B-8274:1/1;Sam…	1	2080103	2080103	1	A	C	stop_lost&splice_region_variant	HIGH	CORT_0A09400	CPAR2_210120	---	---		c.1014A>C	p.Ter338Tyrext*?	1014/1014	338/337	character(0)	hypothetical protein	NA	NULL|Ferric reductase transmembrane component-like domain		TRUE
1_2082981_C_CT	0.226455	0.350823	0.485363	0.196116	0.196116	0.438529	0.622752	0.196116	0.196116	0.681385	0.339683	0.138675	0.226455	0.532181	0.858754	0.138675	0.392232	0.392232	0.196116	0.518875	0.920737	0.196116	Sample_151:1/1;Sample_1540:1/1;Sample_1799:1/1;Sample_1825:1/1;Sample_185:1/1;Sample_282:0/1;Sample_320:0/1;Sample_421:1/1;Sample_422:1/1;Sample_423:1/1;Sample_424:1/1;Sample_425:1/1;Sample_426:1/1;Sample_427:1/1;Sample_433:1/1;Sample_434:1/1;Sample_435:1/1;Sample_436:1/1;Sample_437:1/1;Sample_498:0/1;Sample_504:1/1;Sample_599:1/1;Sample_748:0/1;Sample_831:1/1;Sample_B-8274:1/1;Sample_B-8323:1/1	1	2082981	2082981	1	C	CT	frameshift_variant	HIGH	CORT_0A09420	CPAR2_210140	orf19.3538	---		c.468dupT	p.Gln157fs	469/2268	157/755	(CORT_0A09420|CORT_0A09420|1|1.00)	protein similar to ferric reductase Fre10p	NA	Ferredoxin reductase-type FAD-binding domain|Ferric reductase, NAD binding|NULL|Ferric reductase transmembrane component-like domain|FAD-binding 8	Molecular Function: oxidoreductase activity (GO:0016491), Biological Process: oxidation-reduction process (GO:0055114)|	TRUE
1_2082986_AG_A	0.226455	0.350823	0.485363	0.196116	0.196116	0.438529	0.622752	0.196116	0.196116	0.681385	0.339683	0.138675	0.226455	0.532181	0.858754	0.138675	0.392232	0.392232	0.196116	0.518875	0.920737	0.196116	Sample_151:1/1;Sample_1540:1/1;Sample_1799:1/1;Sample_1825:1/1;Sample_185:1/1;Sample_282:0/1;Sample_320:0/1;Sample_421:1/1;Sample_422:1/1;Sample_423:1/1;Sample_424:1/1;Sample_425:1/1;Sample_426:1/1;Sample_427:1/1;Sample_433:1/1;Sample_434:1/1;Sample_435:1/1;Sample_436:1/1;Sample_437:1/1;Sample_498:0/1;Sample_504:1/1;Sample_599:1/1;Sample_748:0/1;Sample_831:1/1;Sample_B-8274:1/1;Sample_B-8323:1/1	1	2082986	2082987	2	AG	A	frameshift_variant	HIGH	CORT_0A09420	CPAR2_210140	orf19.3538	---		c.471delG	p.Gln157fs	471/2268	157/755	(CORT_0A09420|CORT_0A09420|1|1.00)	protein similar to ferric reductase Fre10p	NA	Ferredoxin reductase-type FAD-binding domain|Ferric reductase, NAD binding|NULL|Ferric reductase transmembrane component-like domain|FAD-binding 8	Molecular Function: oxidoreductase activity (GO:0016491), Biological Process: oxidation-reduction process (GO:0055114)|	TRUE
1_2093017_A_C	0.23094	0.357771	0.494975	0.2	0.2	0.447214	0.57735	0.2	0.2	0.694879	0.34641	0.141421	0.23094	0.54272	0.834058	0.141421	0.4	0.4	0.2	0.52915	0.898146	0.2	Sample_151:0/1;Sample_1540:0/1;Sample_1799:1/1;Sample_1825:0/1;Sample_185:0/1;Sample_282:0/1;Sample_320:0/1;Sample_421:0/1;Sample_422:0/1;Sample_423:1/1;Sample_425:1/1;Sample_426:1/1;Sample_427:1/1;Sample_433:0/1;Sample_434:1/1;Sample_435:1/1;Sample_436:1/1;Sample_437:0/1;Sample_498:0/1;Sample_504:1/1;Sample_599:0/1;Sample_748:0/1;Sample_831:1/1;Sample_B-8274:0/1;Sample_B-8323:1/1	1	2093017	2093017	1	A	C	stop_lost&splice_region_variant	HIGH	CORT_0A09470	CPAR2_210190	---	---		c.427T>G	p.Ter143Glyext*?	427/429	143/142	character(0)	hypothetical protein	NA	NULL		FALSE
1_2098921_C_CT	0.235702	0.365148	0.433013	0.204124	0.204124	0.365148	0.53033	0.204124	0.204124	0.654654	0.353553	0.144338	0.235702	0.553912	0.808694	0.144338	0.306186	0.306186	0.204124	0.46291	0.875	0.204124	Sample_151:0/1;Sample_1540:0/1;Sample_1799:0/1;Sample_1825:0/1;Sample_185:0/1;Sample_282:0/1;Sample_320:0/1;Sample_421:0/1;Sample_422:0/1;Sample_423:0/1;Sample_425:0/1;Sample_426:0/1;Sample_427:1/1;Sample_433:0/1;Sample_434:0/1;Sample_435:0/1;Sample_437:0/1;Sample_498:1/1;Sample_504:0/1;Sample_599:0/1;Sample_748:0/1;Sample_831:0/1;Sample_B-8274:0/1;Sample_B-8323:0/1	1	2098921	2098921	1	C	CT	frameshift_variant	HIGH	CORT_0A09500	CPAR2_210200	orf19.1499	---	CTF1	c.2296_2297insT	p.Arg766fs	2297/3267	766/1088	(CORT_0A09500|CORT_0A09500|1|1.00)	putative zinc-finger transcription factor, similar to A. nidulans FarA and FarB	extra-virgin olive oil;utilization of carbon source: absent;|polysorbate 20;utilization of carbon source: absent;|polysorbate 60;utilization of carbon source: normal;utilization of Tween 80 and Tween 85 is also wild-type|;viable;|;viable;|oleic acid;utilization of carbon source: absent;|linoleic acid;utilization of carbon source: absent;|;virulence: decreased;slight decrease	Zn(2)-C6 fungal-type DNA-binding domain|Transcription factor, fungi|NULL	Molecular Function: sequence-specific DNA binding RNA polymerase II transcription factor activity (GO:0000981), Cellular Component: nucleus (GO:0005634), Biological Process: regulation of transcription, DNA-dependent (GO:0006355), Molecular Function: zinc ion binding (GO:0008270)|Molecular Function: DNA binding (GO:0003677), Cellular Component: nucleus (GO:0005634), Biological Process: transcript…	TRUE
1_2098922_G_GCAACT	0.235702	0.365148	0.433013	0.204124	0.204124	0.365148	0.53033	0.204124	0.204124	0.654654	0.353553	0.144338	0.235702	0.553912	0.808694	0.144338	0.306186	0.306186	0.204124	0.46291	0.875	0.204124	Sample_151:0/1;Sample_1540:0/1;Sample_1799:0/1;Sample_1825:0/1;Sample_185:0/1;Sample_282:0/1;Sample_320:0/1;Sample_421:0/1;Sample_422:0/1;Sample_423:0/1;Sample_425:0/1;Sample_426:0/1;Sample_427:1/1;Sample_433:0/1;Sample_434:0/1;Sample_435:0/1;Sample_437:0/1;Sample_498:1/1;Sample_504:0/1;Sample_599:0/1;Sample_748:0/1;Sample_831:0/1;Sample_B-8274:0/1;Sample_B-8323:0/1	1	2098922	2098922	1	G	GCAACT	frameshift_variant	HIGH	CORT_0A09500	CPAR2_210200	orf19.1499	---	CTF1	c.2297_2298insCAACT	p.Gln767fs	2298/3267	766/1088	(CORT_0A09500|CORT_0A09500|1|1.00)	putative zinc-finger transcription factor, similar to A. nidulans FarA and FarB	extra-virgin olive oil;utilization of carbon source: absent;|polysorbate 20;utilization of carbon source: absent;|polysorbate 60;utilization of carbon source: normal;utilization of Tween 80 and Tween 85 is also wild-type|;viable;|;viable;|oleic acid;utilization of carbon source: absent;|linoleic acid;utilization of carbon source: absent;|;virulence: decreased;slight decrease	Zn(2)-C6 fungal-type DNA-binding domain|Transcription factor, fungi|NULL	Molecular Function: sequence-specific DNA binding RNA polymerase II transcription factor activity (GO:0000981), Cellular Component: nucleus (GO:0005634), Biological Process: regulation of transcription, DNA-dependent (GO:0006355), Molecular Function: zinc ion binding (GO:0008270)|Molecular Function: DNA binding (GO:0003677), Cellular Component: nucleus (GO:0005634), Biological Process: transcript…	TRUE
1_2112794_C_A	0.226455	0.350823	0.485363	0.196116	0.196116	0.438529	0.622752	0.196116	0.196116	0.681385	0.339683	0.138675	0.226455	0.532181	0.858754	0.138675	0.392232	0.392232	0.196116	0.518875	0.920737	0.196116	Sample_151:0/1;Sample_1540:0/1;Sample_1799:1/1;Sample_1825:0/1;Sample_185:0/1;Sample_282:0/1;Sample_320:0/1;Sample_421:0/1;Sample_422:0/1;Sample_423:1/1;Sample_424:0/1;Sample_425:0/1;Sample_426:0/1;Sample_427:0/1;Sample_433:0/1;Sample_434:1/1;Sample_435:0/1;Sample_436:1/1;Sample_437:0/1;Sample_498:0/1;Sample_504:0/1;Sample_599:0/1;Sample_748:0/1;Sample_831:0/1;Sample_B-8274:0/1;Sample_B-8323:0/1	1	2112794	2112794	1	C	A	stop_gained	HIGH	CORT_0A09580	CPAR2_210280	orf19.1491	YGR013W	SNU71,	c.272C>A	p.Ser91*	272/1710	91/569	character(0)	S. cerevisiae homolog SNU71 has RNA binding, has role in nuclear mRNA splicing, via spliceosome and localizes to U1 snRNP, U2-type prespliceosome	;viable;|clotrimazole (75 uM);resistance to chemicals: decreased;confirmation of mutant phenotypes for heterozygous transposon insertion strains showing sensitivity in a large-scale assay	Splicing factor PWI	Biological Process: mRNA processing (GO:0006397)	FALSE
1_2114042_G_GT	0.226455	0.350823	0.485363	0.196116	0.196116	0.438529	0.622752	0.196116	0.196116	0.681385	0.339683	0.138675	0.226455	0.532181	0.858754	0.138675	0.392232	0.392232	0.196116	0.518875	0.920737	0.196116	Sample_151:0/1;Sample_1540:0/1;Sample_1799:0/1;Sample_1825:0/1;Sample_185:0/1;Sample_282:0/1;Sample_320:0/1;Sample_421:0/1;Sample_422:0/1;Sample_423:0/1;Sample_424:0/1;Sample_425:0/1;Sample_426:0/1;Sample_427:0/1;Sample_433:0/1;Sample_434:0/1;Sample_435:0/1;Sample_436:1/1;Sample_437:0/1;Sample_498:0/1;Sample_504:0/1;Sample_599:0/1;Sample_748:0/1;Sample_831:0/1;Sample_B-8274:0/1;Sample_B-8323:0/1	1	2114042	2114042	1	G	GT	frameshift_variant	HIGH	CORT_0A09580	CPAR2_210280	orf19.1491	YGR013W	SNU71,	c.1520_1521insT	p.Asn508fs	1521/1710	507/569	(CORT_0A09580|CORT_0A09580|1|1.00)	S. cerevisiae homolog SNU71 has RNA binding, has role in nuclear mRNA splicing, via spliceosome and localizes to U1 snRNP, U2-type prespliceosome	;viable;|clotrimazole (75 uM);resistance to chemicals: decreased;confirmation of mutant phenotypes for heterozygous transposon insertion strains showing sensitivity in a large-scale assay	Splicing factor PWI	Biological Process: mRNA processing (GO:0006397)	TRUE
1_2114045_AC_A	0.226455	0.350823	0.485363	0.196116	0.196116	0.438529	0.622752	0.196116	0.196116	0.681385	0.339683	0.138675	0.226455	0.532181	0.858754	0.138675	0.392232	0.392232	0.196116	0.518875	0.920737	0.196116	Sample_151:0/1;Sample_1540:0/1;Sample_1799:0/1;Sample_1825:0/1;Sample_185:0/1;Sample_282:0/1;Sample_320:0/1;Sample_421:0/1;Sample_422:0/1;Sample_423:0/1;Sample_424:0/1;Sample_425:0/1;Sample_426:0/1;Sample_427:0/1;Sample_433:0/1;Sample_434:0/1;Sample_435:0/1;Sample_436:1/1;Sample_437:0/1;Sample_498:0/1;Sample_504:0/1;Sample_599:0/1;Sample_748:0/1;Sample_831:0/1;Sample_B-8274:0/1;Sample_B-8323:0/1	1	2114045	2114046	2	AC	A	frameshift_variant	HIGH	CORT_0A09580	CPAR2_210280	orf19.1491	YGR013W	SNU71,	c.1524delC	p.Leu509fs	1524/1710	508/569	(CORT_0A09580|CORT_0A09580|1|1.00)	S. cerevisiae homolog SNU71 has RNA binding, has role in nuclear mRNA splicing, via spliceosome and localizes to U1 snRNP, U2-type prespliceosome	;viable;|clotrimazole (75 uM);resistance to chemicals: decreased;confirmation of mutant phenotypes for heterozygous transposon insertion strains showing sensitivity in a large-scale assay	Splicing factor PWI	Biological Process: mRNA processing (GO:0006397)	TRUE
1_2114967_G_T	0.226455	0.350823	0.485363	0.196116	0.196116	0.438529	0.622752	0.196116	0.196116	0.681385	0.339683	0.138675	0.226455	0.532181	0.858754	0.138675	0.392232	0.392232	0.196116	0.518875	0.920737	0.196116	Sample_151:0/1;Sample_1540:0/1;Sample_1799:0/1;Sample_1825:0/1;Sample_185:0/1;Sample_282:0/1;Sample_320:0/1;Sample_421:0/1;Sample_422:0/1;Sample_423:0/1;Sample_424:0/1;Sample_425:0/1;Sample_426:0/1;Sample_427:0/1;Sample_433:0/1;Sample_434:0/1;Sample_435:0/1;Sample_436:1/1;Sample_437:0/1;Sample_498:0/1;Sample_504:0/1;Sample_599:0/1;Sample_748:0/1;Sample_831:0/1;Sample_B-8274:0/1;Sample_B-8323:0/1	1	2114967	2114967	1	G	T	start_lost	HIGH	CORT_0A09590	---	---	---		c.3G>T	p.Met1?	3/510	1/169	(CORT_0A09590|CORT_0A09590|1|1.00)	hypothetical protein	NA	NULL		FALSE
1_2115270_GT_G	0.226455	0.350823	0.485363	0.196116	0.196116	0.438529	0.622752	0.196116	0.196116	0.681385	0.339683	0.138675	0.226455	0.532181	0.858754	0.138675	0.392232	0.392232	0.196116	0.518875	0.920737	0.196116	Sample_151:0/1;Sample_1540:0/1;Sample_1799:0/1;Sample_1825:0/1;Sample_185:0/1;Sample_282:0/1;Sample_320:0/1;Sample_421:0/1;Sample_422:0/1;Sample_423:0/1;Sample_424:0/1;Sample_425:0/1;Sample_426:0/1;Sample_427:0/1;Sample_433:0/1;Sample_434:0/1;Sample_435:0/1;Sample_436:1/1;Sample_437:0/1;Sample_498:0/1;Sample_504:0/1;Sample_599:0/1;Sample_748:0/1;Sample_831:0/1;Sample_B-8274:0/1;Sample_B-8323:0/1	1	2115270	2115271	2	GT	G	frameshift_variant	HIGH	CORT_0A09590	---	---	---		c.311delT	p.Leu104fs	311/510	104/169	(CORT_0A09590|CORT_0A09590|1|1.00)	hypothetical protein	NA	NULL		FALSE
1_2115302_AT_A	0.226455	0.350823	0.485363	0.196116	0.196116	0.438529	0.622752	0.196116	0.196116	0.681385	0.339683	0.138675	0.226455	0.532181	0.858754	0.138675	0.392232	0.392232	0.196116	0.518875	0.920737	0.196116	Sample_151:0/1;Sample_1540:0/1;Sample_1799:0/1;Sample_1825:0/1;Sample_185:0/1;Sample_282:0/1;Sample_320:0/1;Sample_421:0/1;Sample_422:0/1;Sample_423:0/1;Sample_424:0/1;Sample_425:0/1;Sample_426:0/1;Sample_427:0/1;Sample_433:0/1;Sample_434:0/1;Sample_435:0/1;Sample_436:1/1;Sample_437:0/1;Sample_498:0/1;Sample_504:0/1;Sample_599:0/1;Sample_748:0/1;Sample_831:0/1;Sample_B-8274:0/1;Sample_B-8323:0/1	1	2115302	2115303	2	AT	A	frameshift_variant	HIGH	CORT_0A09590	---	---	---		c.339delT	p.Pro114fs	339/510	113/169	(CORT_0A09590|CORT_0A09590|1|1.00)	hypothetical protein	NA	NULL		TRUE
1_2115306_T_TC	0.226455	0.350823	0.485363	0.196116	0.196116	0.438529	0.622752	0.196116	0.196116	0.681385	0.339683	0.138675	0.226455	0.532181	0.858754	0.138675	0.392232	0.392232	0.196116	0.518875	0.920737	0.196116	Sample_151:0/1;Sample_1540:0/1;Sample_1799:0/1;Sample_1825:0/1;Sample_185:0/1;Sample_282:0/1;Sample_320:0/1;Sample_421:0/1;Sample_422:0/1;Sample_423:0/1;Sample_424:0/1;Sample_425:0/1;Sample_426:0/1;Sample_427:0/1;Sample_433:0/1;Sample_434:0/1;Sample_435:0/1;Sample_436:1/1;Sample_437:0/1;Sample_498:0/1;Sample_504:0/1;Sample_599:0/1;Sample_748:0/1;Sample_831:0/1;Sample_B-8274:0/1;Sample_B-8323:0/1	1	2115306	2115306	1	T	TC	frameshift_variant	HIGH	CORT_0A09590	---	---	---		c.342_343insC	p.Ile116fs	343/510	115/169	(CORT_0A09590|CORT_0A09590|1|1.00)	hypothetical protein	NA	NULL		TRUE
1_2115421_G_T	0.226455	0.350823	0.485363	0.196116	0.196116	0.438529	0.622752	0.196116	0.196116	0.681385	0.339683	0.138675	0.226455	0.532181	0.858754	0.138675	0.392232	0.392232	0.196116	0.518875	0.920737	0.196116	Sample_151:0/1;Sample_1540:0/1;Sample_1799:0/1;Sample_1825:0/1;Sample_185:0/1;Sample_282:0/1;Sample_320:0/1;Sample_421:0/1;Sample_422:0/1;Sample_423:0/1;Sample_424:0/1;Sample_425:0/1;Sample_426:0/1;Sample_427:0/1;Sample_433:0/1;Sample_434:0/1;Sample_435:0/1;Sample_436:1/1;Sample_437:0/1;Sample_498:0/1;Sample_504:0/1;Sample_599:0/1;Sample_748:0/1;Sample_831:0/1;Sample_B-8274:0/1;Sample_B-8323:0/1	1	2115421	2115421	1	G	T	stop_gained	HIGH	CORT_0A09590	---	---	---		c.457G>T	p.Glu153*	457/510	153/169	character(0)	hypothetical protein	NA	NULL		FALSE
1_2115446_CTT_C	0.226455	0.350823	0.485363	0.196116	0.196116	0.438529	0.622752	0.196116	0.196116	0.681385	0.339683	0.138675	0.226455	0.532181	0.858754	0.138675	0.392232	0.392232	0.196116	0.518875	0.920737	0.196116	Sample_151:0/1;Sample_1540:0/1;Sample_1799:0/1;Sample_1825:0/1;Sample_185:0/1;Sample_282:0/1;Sample_320:0/1;Sample_421:0/1;Sample_422:0/1;Sample_423:0/1;Sample_424:0/1;Sample_425:0/1;Sample_426:0/1;Sample_427:0/1;Sample_433:0/1;Sample_434:0/1;Sample_435:0/1;Sample_436:1/1;Sample_437:0/1;Sample_498:0/1;Sample_504:0/1;Sample_599:0/1;Sample_748:0/1;Sample_831:0/1;Sample_B-8274:0/1;Sample_B-8323:0/1	1	2115446	2115448	3	CTT	C	frameshift_variant	HIGH	CORT_0A09590	---	---	---		c.484_485delTT	p.Leu162fs	484/510	162/169	character(0)	hypothetical protein	NA	NULL		FALSE
1_2133377_CTTTT_CTT	0.57735	0.894427	0.53033	0.5	0.5	0	0	0	0	0	0	0.707107	0.866025	0.603023	0.417029	0	0	0	0	0.188982	0.306186	0	Sample_1799:0/1;Sample_423:0/1;Sample_428:1/1;Sample_434:0/1	1	2133377	2133381	5	CTTTT	CTT	frameshift_variant	HIGH	CORT_0A09660	CPAR2_210345	orf19.1482	---		c.48_49delAA	p.Lys17fs	49/435	16/144	(CORT_0A09660|CORT_0A09660|1|1.00)	putative subunit of the Dam1 (DASH) complex, which acts in chromosome segregation by coupling kinetochores to spindle microtubules	NA	Protein of unknown function DUF1721, fungi		FALSE
1_2151392_GAA_G	0.23094	0.357771	0.494975	0.2	0.2	0.447214	0.57735	0.2	0.2	0.641427	0.34641	0.141421	0.23094	0.482418	0.834058	0.141421	0.4	0.4	0.2	0.52915	0.898146	0.2	Sample_151:0/1;Sample_1540:0/1;Sample_1799:0/1;Sample_1825:0/1;Sample_185:0/1;Sample_282:0/1;Sample_320:0/1;Sample_421:0/1;Sample_422:0/1;Sample_423:0/1;Sample_424:0/1;Sample_425:1/1;Sample_426:0/1;Sample_427:0/1;Sample_433:1/1;Sample_434:0/1;Sample_435:0/1;Sample_436:1/1;Sample_437:0/1;Sample_498:0/1;Sample_504:1/1;Sample_599:0/1;Sample_748:0/1;Sample_831:1/1;Sample_B-8323:1/1	1	2151392	2151394	3	GAA	G	frameshift_variant	HIGH	CORT_0A09740	CPAR2_210420	orf19.1541	---		c.2032_2033delAA	p.Lys678fs	2032/2628	678/875	(CORT_0A09740|CORT_0A09740|1|1.00)	hypothetical protein	;viable;	Globin, structural domain|Globin-like|Globin	Molecular Function: iron ion binding (GO:0005506), Biological Process: oxygen transport (GO:0015671), Molecular Function: oxygen binding (GO:0019825), Molecular Function: heme binding (GO:0020037)||Molecular Function: iron ion binding (GO:0005506), Molecular Function: heme binding (GO:0020037)	TRUE
1_2151396_G_GGA	0.23094	0.357771	0.494975	0.2	0.2	0.447214	0.57735	0.2	0.2	0.641427	0.34641	0.141421	0.23094	0.482418	0.834058	0.141421	0.4	0.4	0.2	0.52915	0.898146	0.2	Sample_151:0/1;Sample_1540:0/1;Sample_1799:0/1;Sample_1825:0/1;Sample_185:0/1;Sample_282:0/1;Sample_320:0/1;Sample_421:0/1;Sample_422:0/1;Sample_423:0/1;Sample_424:0/1;Sample_425:1/1;Sample_426:0/1;Sample_427:0/1;Sample_433:1/1;Sample_434:0/1;Sample_435:0/1;Sample_436:1/1;Sample_437:0/1;Sample_498:0/1;Sample_504:1/1;Sample_599:0/1;Sample_748:0/1;Sample_831:1/1;Sample_B-8323:1/1	1	2151396	2151396	1	G	GGA	frameshift_variant	HIGH	CORT_0A09740	CPAR2_210420	orf19.1541	---		c.2034_2035insGA	p.Gln679fs	2035/2628	679/875	(CORT_0A09740|CORT_0A09740|1|1.00)	hypothetical protein	;viable;	Globin, structural domain|Globin-like|Globin	Molecular Function: iron ion binding (GO:0005506), Biological Process: oxygen transport (GO:0015671), Molecular Function: oxygen binding (GO:0019825), Molecular Function: heme binding (GO:0020037)||Molecular Function: iron ion binding (GO:0005506), Molecular Function: heme binding (GO:0020037)	TRUE
1_2154678_A_AG	0.226455	0.350823	0.485363	0.196116	0.196116	0.438529	0.622752	0.196116	0.196116	0.681385	0.339683	0.138675	0.226455	0.532181	0.858754	0.138675	0.392232	0.392232	0.196116	0.518875	0.920737	0.196116	Sample_151:0/1;Sample_1540:0/1;Sample_1799:1/1;Sample_1825:0/1;Sample_185:0/1;Sample_282:0/1;Sample_320:0/1;Sample_421:0/1;Sample_422:0/1;Sample_423:1/1;Sample_424:0/1;Sample_425:1/1;Sample_426:0/1;Sample_427:0/1;Sample_433:1/1;Sample_434:1/1;Sample_435:0/1;Sample_436:1/1;Sample_437:0/1;Sample_498:0/1;Sample_504:1/1;Sample_599:0/1;Sample_748:0/1;Sample_831:1/1;Sample_B-8274:0/1;Sample_B-8323:1/1	1	2154678	2154678	1	A	AG	frameshift_variant	HIGH	CORT_0A09750	CPAR2_210430	orf19.896	---	CHK1	c.132_133insG	p.Ser45fs	133/7638	45/2545	character(0)	histidine kinase involved in a two-component signaling pathway that regulates cell wall biosynthesis	fluconazole;resistance to chemicals: decreased;|;flocculation: increased;flocculence is less severe than that of homozygous null mutant|;flocculation: increased;|;flocculation: increased;|Calcofluor White;resistance to chemicals: decreased;|;germ tube formation: abnormal;defect in farnesol-mediated inhibition of germination|;germ tube formation: abnormal;defect in farnesol-mediated inhibition of …	NULL|Signal transduction histidine kinase, homodimeric|Signal transduction response regulator, receiver domain|ATPase-like, ATP-binding domain|Protein kinase, catalytic domain|Signal transduction histidine kinase, subgroup 1, dimerisation/phosphoacceptor domain|Signal transduction histidine kinase, core|Protein kinase-like domain|CheY-like superfamily|GAF domain|Signal transduction histidine kina…	|Molecular Function: signal transducer activity (GO:0004871), Biological Process: signal transduction (GO:0007165)|Molecular Function: two-component response regulator activity (GO:0000156), Biological Process: two-component signal transduction system (phosphorelay) (GO:0000160), Biological Process: regulation of transcription, DNA-dependent (GO:0006355)|Molecular Function: ATP binding (GO:000552…	TRUE
1_2154680_GC_G	0.226455	0.350823	0.485363	0.196116	0.196116	0.438529	0.622752	0.196116	0.196116	0.681385	0.339683	0.138675	0.226455	0.532181	0.858754	0.138675	0.392232	0.392232	0.196116	0.518875	0.920737	0.196116	Sample_151:0/1;Sample_1540:0/1;Sample_1799:1/1;Sample_1825:0/1;Sample_185:0/1;Sample_282:0/1;Sample_320:0/1;Sample_421:0/1;Sample_422:0/1;Sample_423:1/1;Sample_424:0/1;Sample_425:1/1;Sample_426:0/1;Sample_427:0/1;Sample_433:1/1;Sample_434:1/1;Sample_435:0/1;Sample_436:1/1;Sample_437:0/1;Sample_498:0/1;Sample_504:1/1;Sample_599:0/1;Sample_748:0/1;Sample_831:1/1;Sample_B-8274:0/1;Sample_B-8323:1/1	1	2154680	2154681	2	GC	G	frameshift_variant	HIGH	CORT_0A09750	CPAR2_210430	orf19.896	---	CHK1	c.136delC	p.Arg46fs	136/7638	46/2545	character(0)	histidine kinase involved in a two-component signaling pathway that regulates cell wall biosynthesis	fluconazole;resistance to chemicals: decreased;|;flocculation: increased;flocculence is less severe than that of homozygous null mutant|;flocculation: increased;|;flocculation: increased;|Calcofluor White;resistance to chemicals: decreased;|;germ tube formation: abnormal;defect in farnesol-mediated inhibition of germination|;germ tube formation: abnormal;defect in farnesol-mediated inhibition of …	NULL|Signal transduction histidine kinase, homodimeric|Signal transduction response regulator, receiver domain|ATPase-like, ATP-binding domain|Protein kinase, catalytic domain|Signal transduction histidine kinase, subgroup 1, dimerisation/phosphoacceptor domain|Signal transduction histidine kinase, core|Protein kinase-like domain|CheY-like superfamily|GAF domain|Signal transduction histidine kina…	|Molecular Function: signal transducer activity (GO:0004871), Biological Process: signal transduction (GO:0007165)|Molecular Function: two-component response regulator activity (GO:0000156), Biological Process: two-component signal transduction system (phosphorelay) (GO:0000160), Biological Process: regulation of transcription, DNA-dependent (GO:0006355)|Molecular Function: ATP binding (GO:000552…	TRUE
1_2159086_AACACC_A	0.23094	0.357771	0.494975	0.2	0.2	0.447214	0.57735	0.2	0.2	0.641427	0.34641	0.141421	0.23094	0.482418	0.834058	0.141421	0.4	0.4	0.2	0.52915	0.898146	0.2	Sample_151:0/1;Sample_1540:0/1;Sample_1799:1/1;Sample_1825:0/1;Sample_185:0/1;Sample_282:0/1;Sample_320:0/1;Sample_421:0/1;Sample_422:0/1;Sample_423:1/1;Sample_424:0/1;Sample_425:1/1;Sample_426:1/1;Sample_427:1/1;Sample_433:0/1;Sample_434:1/1;Sample_435:1/1;Sample_436:1/1;Sample_437:0/1;Sample_498:0/1;Sample_504:1/1;Sample_599:0/1;Sample_748:0/1;Sample_831:1/1;Sample_B-8323:1/1	1	2159086	2159091	6	AACACC	A	frameshift_variant	HIGH	CORT_0A09750	CPAR2_210430	orf19.896	---	CHK1	c.4541_4545delACACC	p.Asn1514fs	4541/7638	1514/2545	(CORT_0A09750|CORT_0A09750|1|1.00)	histidine kinase involved in a two-component signaling pathway that regulates cell wall biosynthesis	fluconazole;resistance to chemicals: decreased;|;flocculation: increased;flocculence is less severe than that of homozygous null mutant|;flocculation: increased;|;flocculation: increased;|Calcofluor White;resistance to chemicals: decreased;|;germ tube formation: abnormal;defect in farnesol-mediated inhibition of germination|;germ tube formation: abnormal;defect in farnesol-mediated inhibition of …	NULL|Signal transduction histidine kinase, homodimeric|Signal transduction response regulator, receiver domain|ATPase-like, ATP-binding domain|Protein kinase, catalytic domain|Signal transduction histidine kinase, subgroup 1, dimerisation/phosphoacceptor domain|Signal transduction histidine kinase, core|Protein kinase-like domain|CheY-like superfamily|GAF domain|Signal transduction histidine kina…	|Molecular Function: signal transducer activity (GO:0004871), Biological Process: signal transduction (GO:0007165)|Molecular Function: two-component response regulator activity (GO:0000156), Biological Process: two-component signal transduction system (phosphorelay) (GO:0000160), Biological Process: regulation of transcription, DNA-dependent (GO:0006355)|Molecular Function: ATP binding (GO:000552…	TRUE
1_2159091_C_CGT	0.23094	0.357771	0.494975	0.2	0.2	0.447214	0.57735	0.2	0.2	0.641427	0.34641	0.141421	0.23094	0.482418	0.834058	0.141421	0.4	0.4	0.2	0.52915	0.898146	0.2	Sample_151:0/1;Sample_1540:0/1;Sample_1799:1/1;Sample_1825:0/1;Sample_185:0/1;Sample_282:0/1;Sample_320:0/1;Sample_421:0/1;Sample_422:0/1;Sample_423:1/1;Sample_424:0/1;Sample_425:1/1;Sample_426:1/1;Sample_427:1/1;Sample_433:0/1;Sample_434:1/1;Sample_435:1/1;Sample_436:1/1;Sample_437:0/1;Sample_498:0/1;Sample_504:1/1;Sample_599:0/1;Sample_748:0/1;Sample_831:1/1;Sample_B-8323:1/1	1	2159091	2159091	1	C	CGT	frameshift_variant	HIGH	CORT_0A09750	CPAR2_210430	orf19.896	---	CHK1	c.4545_4546insGT	p.Gln1516fs	4546/7638	1516/2545	(CORT_0A09750|CORT_0A09750|1|1.00)	histidine kinase involved in a two-component signaling pathway that regulates cell wall biosynthesis	fluconazole;resistance to chemicals: decreased;|;flocculation: increased;flocculence is less severe than that of homozygous null mutant|;flocculation: increased;|;flocculation: increased;|Calcofluor White;resistance to chemicals: decreased;|;germ tube formation: abnormal;defect in farnesol-mediated inhibition of germination|;germ tube formation: abnormal;defect in farnesol-mediated inhibition of …	NULL|Signal transduction histidine kinase, homodimeric|Signal transduction response regulator, receiver domain|ATPase-like, ATP-binding domain|Protein kinase, catalytic domain|Signal transduction histidine kinase, subgroup 1, dimerisation/phosphoacceptor domain|Signal transduction histidine kinase, core|Protein kinase-like domain|CheY-like superfamily|GAF domain|Signal transduction histidine kina…	|Molecular Function: signal transducer activity (GO:0004871), Biological Process: signal transduction (GO:0007165)|Molecular Function: two-component response regulator activity (GO:0000156), Biological Process: two-component signal transduction system (phosphorelay) (GO:0000160), Biological Process: regulation of transcription, DNA-dependent (GO:0006355)|Molecular Function: ATP binding (GO:000552…	TRUE
1_2166686_AT_A	0.226455	0.350823	0.485363	0.196116	0.196116	0.438529	0.622752	0.196116	0.196116	0.681385	0.339683	0.138675	0.226455	0.532181	0.858754	0.138675	0.392232	0.392232	0.196116	0.518875	0.920737	0.196116	Sample_151:0/1;Sample_1540:0/1;Sample_1799:1/1;Sample_1825:0/1;Sample_185:0/1;Sample_282:0/1;Sample_320:0/1;Sample_421:0/1;Sample_422:0/1;Sample_423:1/1;Sample_424:0/1;Sample_425:1/1;Sample_426:1/1;Sample_427:1/1;Sample_433:0/1;Sample_434:1/1;Sample_435:1/1;Sample_436:1/1;Sample_437:0/1;Sample_498:0/1;Sample_504:1/1;Sample_599:1/1;Sample_748:0/1;Sample_831:1/1;Sample_B-8274:0/1;Sample_B-8323:1/1	1	2166686	2166687	2	AT	A	frameshift_variant	HIGH	CORT_0A09780	CPAR2_210460	orf19.403	YDL127W	PCL2,PCL2	c.160delA	p.Met54fs	160/1083	54/360	(CORT_0A09780|CORT_0A09780|1|1.00)	cyclin homolog	;viable;|;competitive fitness: normal;R\I score is the median log2(R/I) value representing abundance of the mutant in recovered pool relative to inoculum|;colony appearance: normal;Morphology (M) score represents relative sizes of central and peripheral regions of colony|;vegetative growth: normal rate;|;viable;	Cyclin Pcl, fungi|Cyclin-like|Cyclin PHO80-like|NULL	Biological Process: regulation of cyclin-dependent protein kinase activity (GO:0000079), Molecular Function: protein kinase binding (GO:0019901), Biological Process: regulation of cell cycle (GO:0051726)||Biological Process: regulation of cyclin-dependent protein kinase activity (GO:0000079), Molecular Function: protein kinase binding (GO:0019901)	TRUE
1_2166688_CAG_C	0.226455	0.350823	0.485363	0.196116	0.196116	0.438529	0.622752	0.196116	0.196116	0.681385	0.339683	0.138675	0.226455	0.532181	0.858754	0.138675	0.392232	0.392232	0.196116	0.518875	0.920737	0.196116	Sample_151:0/1;Sample_1540:0/1;Sample_1799:1/1;Sample_1825:0/1;Sample_185:0/1;Sample_282:0/1;Sample_320:0/1;Sample_421:0/1;Sample_422:0/1;Sample_423:1/1;Sample_424:0/1;Sample_425:1/1;Sample_426:1/1;Sample_427:1/1;Sample_433:0/1;Sample_434:1/1;Sample_435:1/1;Sample_436:1/1;Sample_437:0/1;Sample_498:0/1;Sample_504:1/1;Sample_599:1/1;Sample_748:0/1;Sample_831:1/1;Sample_B-8274:0/1;Sample_B-8323:1/1	1	2166688	2166690	3	CAG	C	frameshift_variant	HIGH	CORT_0A09780	CPAR2_210460	orf19.403	YDL127W	PCL2,PCL2	c.157_158delCT	p.Leu53fs	158/1083	53/360	(CORT_0A09780|CORT_0A09780|1|1.00)	cyclin homolog	;viable;|;competitive fitness: normal;R\I score is the median log2(R/I) value representing abundance of the mutant in recovered pool relative to inoculum|;colony appearance: normal;Morphology (M) score represents relative sizes of central and peripheral regions of colony|;vegetative growth: normal rate;|;viable;	Cyclin Pcl, fungi|Cyclin-like|Cyclin PHO80-like|NULL	Biological Process: regulation of cyclin-dependent protein kinase activity (GO:0000079), Molecular Function: protein kinase binding (GO:0019901), Biological Process: regulation of cell cycle (GO:0051726)||Biological Process: regulation of cyclin-dependent protein kinase activity (GO:0000079), Molecular Function: protein kinase binding (GO:0019901)	TRUE
1_2173373_G_A	0.226455	0.350823	0.485363	0.196116	0.196116	0.438529	0.622752	0.196116	0.196116	0.681385	0.339683	0.138675	0.226455	0.532181	0.858754	0.138675	0.392232	0.392232	0.196116	0.518875	0.920737	0.196116	Sample_151:0/1;Sample_1540:0/1;Sample_1799:1/1;Sample_1825:0/1;Sample_185:0/1;Sample_282:0/1;Sample_320:0/1;Sample_421:0/1;Sample_422:0/1;Sample_423:1/1;Sample_424:0/1;Sample_425:1/1;Sample_426:1/1;Sample_427:1/1;Sample_433:0/1;Sample_434:1/1;Sample_435:1/1;Sample_436:1/1;Sample_437:0/1;Sample_498:0/1;Sample_504:1/1;Sample_599:0/1;Sample_748:0/1;Sample_831:1/1;Sample_B-8274:0/1;Sample_B-8323:1/1	1	2173373	2173373	1	G	A	stop_gained	HIGH	CORT_0A09810	---	---	---		c.118C>T	p.Gln40*	118/552	40/183	character(0)	hypothetical protein	NA	CsbD-like		FALSE
1_2212025_C_CTT	0.57735	0.447214	0	1	1	0	0	0	0	0	0	0	0.57735	0.301511	0.208514	0	0	0	0	0	0.204124	0	Sample_423:0/1	1	2212025	2212025	1	C	CTT	frameshift_variant	HIGH	CORT_0A10050	CPAR2_210750	orf19.1584	---		c.1275_1276insTT	p.Thr426fs	1276/1626	426/541	(CORT_0A10050|CORT_0A10050|1|1.00)	predicted membrane transporter, member of the monocarboxylate porter (MCP) family, major facilitator superfamily (MFS)	;viable;|;invasive growth: decreased;	Major facilitator superfamily|NULL|Major facilitator superfamily domain|Major facilitator superfamily domain, general substrate transporter	Cellular Component: integral to membrane (GO:0016021), Biological Process: transmembrane transport (GO:0055085)|	FALSE
1_2229394_AT_A	0.235702	0.365148	0.360844	0.204124	0.204124	0.365148	0.589256	0.204124	0.204124	0.654654	0.353553	0.144338	0.235702	0.553912	0.808694	0.144338	0.204124	0.204124	0.204124	0.385758	0.875	0.204124	Sample_151:0/1;Sample_1540:0/1;Sample_1799:1/1;Sample_1825:0/1;Sample_185:0/1;Sample_282:0/1;Sample_320:0/1;Sample_421:0/1;Sample_422:0/1;Sample_423:1/1;Sample_424:0/1;Sample_425:0/1;Sample_426:0/1;Sample_427:0/1;Sample_433:0/1;Sample_434:1/1;Sample_435:0/1;Sample_437:0/1;Sample_498:0/1;Sample_599:0/1;Sample_748:0/1;Sample_831:0/1;Sample_B-8274:0/1;Sample_B-8323:0/1	1	2229394	2229395	2	AT	A	frameshift_variant	HIGH	CORT_0A10170	CPAR2_210820	orf19.1552	YML078W	,CPR3	c.56delA	p.Asn19fs	56/684	19/227	(CORT_0A10170|CORT_0A10170|1|1.00)	putative peptidyl-prolyl cis-trans isomerase	NA	Cyclophilin-like peptidyl-prolyl cis-trans isomerase domain|NULL|Cyclophilin-type peptidyl-prolyl cis-trans isomerase, conserved site	Molecular Function: peptidyl-prolyl cis-trans isomerase activity (GO:0003755), Biological Process: protein folding (GO:0006457)|	FALSE
1_2233026_T_TC	0.235702	0.365148	0.360844	0.204124	0.204124	0.365148	0.589256	0.204124	0.204124	0.654654	0.353553	0.144338	0.235702	0.553912	0.808694	0.144338	0.204124	0.204124	0.204124	0.385758	0.875	0.204124	Sample_151:0/1;Sample_1540:0/1;Sample_1799:1/1;Sample_1825:0/1;Sample_185:0/1;Sample_282:0/1;Sample_320:0/1;Sample_421:0/1;Sample_422:0/1;Sample_423:1/1;Sample_424:0/1;Sample_425:0/1;Sample_426:0/1;Sample_427:0/1;Sample_433:0/1;Sample_434:1/1;Sample_435:0/1;Sample_437:0/1;Sample_498:0/1;Sample_599:0/1;Sample_748:0/1;Sample_831:0/1;Sample_B-8274:0/1;Sample_B-8323:0/1	1	2233026	2233026	1	T	TC	frameshift_variant	HIGH	CORT_0A10190	CPAR2_210840	orf19.1555	YDR159W	SAC3,SAC3	c.2292_2293insG	p.Lys765fs	2292/3897	764/1298	(CORT_0A10190|CORT_0A10190|1|1.00)	putative nuclear pore-associated protein, required for small ribosomal subunit biogenesis	;viable;	mRNA export factor Sac3|NULL|CID domain|SAC3/GANP/Nin1/mts3/eIF-3 p25		TRUE
1_2233028_TCA_T	0.235702	0.365148	0.360844	0.204124	0.204124	0.365148	0.589256	0.204124	0.204124	0.654654	0.353553	0.144338	0.235702	0.553912	0.808694	0.144338	0.204124	0.204124	0.204124	0.385758	0.875	0.204124	Sample_151:0/1;Sample_1540:0/1;Sample_1799:1/1;Sample_1825:0/1;Sample_185:0/1;Sample_282:0/1;Sample_320:0/1;Sample_421:0/1;Sample_422:0/1;Sample_423:1/1;Sample_424:0/1;Sample_425:0/1;Sample_426:0/1;Sample_427:0/1;Sample_433:0/1;Sample_434:1/1;Sample_435:0/1;Sample_437:0/1;Sample_498:0/1;Sample_599:0/1;Sample_748:0/1;Sample_831:0/1;Sample_B-8274:0/1;Sample_B-8323:0/1	1	2233028	2233030	3	TCA	T	frameshift_variant	HIGH	CORT_0A10190	CPAR2_210840	orf19.1555	YDR159W	SAC3,SAC3	c.2289_2290delTG	p.Glu764fs	2290/3897	763/1298	(CORT_0A10190|CORT_0A10190|1|1.00)	putative nuclear pore-associated protein, required for small ribosomal subunit biogenesis	;viable;	mRNA export factor Sac3|NULL|CID domain|SAC3/GANP/Nin1/mts3/eIF-3 p25		TRUE
1_2233135_T_TTC	0.235702	0.365148	0.360844	0.204124	0.204124	0.365148	0.589256	0.204124	0.204124	0.654654	0.353553	0.144338	0.235702	0.553912	0.808694	0.144338	0.204124	0.204124	0.204124	0.385758	0.875	0.204124	Sample_151:0/1;Sample_1540:0/1;Sample_1799:1/1;Sample_1825:0/1;Sample_185:0/1;Sample_282:0/1;Sample_320:0/1;Sample_421:0/1;Sample_422:0/1;Sample_423:1/1;Sample_424:0/1;Sample_425:0/1;Sample_426:0/1;Sample_427:0/1;Sample_433:0/1;Sample_434:1/1;Sample_435:0/1;Sample_437:0/1;Sample_498:0/1;Sample_599:0/1;Sample_748:0/1;Sample_831:0/1;Sample_B-8274:0/1;Sample_B-8323:0/1	1	2233135	2233135	1	T	TTC	frameshift_variant	HIGH	CORT_0A10190	CPAR2_210840	orf19.1555	YDR159W	SAC3,SAC3	c.2183_2184insGA	p.Gln729fs	2183/3897	728/1298	(CORT_0A10190|CORT_0A10190|1|1.00)	putative nuclear pore-associated protein, required for small ribosomal subunit biogenesis	;viable;	mRNA export factor Sac3|NULL|CID domain|SAC3/GANP/Nin1/mts3/eIF-3 p25		TRUE
1_2233136_GTA_G	0.235702	0.365148	0.360844	0.204124	0.204124	0.365148	0.589256	0.204124	0.204124	0.654654	0.353553	0.144338	0.235702	0.553912	0.808694	0.144338	0.204124	0.204124	0.204124	0.385758	0.875	0.204124	Sample_151:0/1;Sample_1540:0/1;Sample_1799:1/1;Sample_1825:0/1;Sample_185:0/1;Sample_282:0/1;Sample_320:0/1;Sample_421:0/1;Sample_422:0/1;Sample_423:1/1;Sample_424:0/1;Sample_425:0/1;Sample_426:0/1;Sample_427:0/1;Sample_433:0/1;Sample_434:1/1;Sample_435:0/1;Sample_437:0/1;Sample_498:0/1;Sample_599:0/1;Sample_748:0/1;Sample_831:0/1;Sample_B-8274:0/1;Sample_B-8323:0/1	1	2233136	2233138	3	GTA	G	frameshift_variant	HIGH	CORT_0A10190	CPAR2_210840	orf19.1555	YDR159W	SAC3,SAC3	c.2181_2182delTA	p.Gln729fs	2182/3897	727/1298	(CORT_0A10190|CORT_0A10190|1|1.00)	putative nuclear pore-associated protein, required for small ribosomal subunit biogenesis	;viable;	mRNA export factor Sac3|NULL|CID domain|SAC3/GANP/Nin1/mts3/eIF-3 p25		TRUE
[truncated: 1,086 more rows]
